# Supplementary material for: Shrimp Plasma CREG Is a Hemocyte Activation Factor
Source: Front Immunol. 2021 Aug 16;12:707770. doi: 10.3389/fimmu.2021.707770 (PMC8415475; doi:10.3389/fimmu.2021.707770)
Supplement: Supplementary Table 1 — Differentially expressed genes between rEGFP- and rCREG-treated shrimp hemocytes. [file DataSheet_1.csv]

Gene ID	rEGFP_3h FPKM	rCREG1_3h FPKM	log2(rCREG1_3h/rEGFP_3h)	FDR(rEGFP_3h-vs-rCREG1_3h)	Pvalue(rEGFP_3h-vs-rCREG1_3h)	TFs	Kegg Orthology	Nt	Nr	Pfam	Kog	Swissprot	GO
CL455.Contig3_All	0	18.19	10.82892983	6.38E-20	1.74E-21
CL561.Contig2_All	0	12.92	10.33539035	8.72E-06	7.79E-07			XR_003475714.1 PREDICTED: Penaeus vannamei uncharacterized LOC113805784 (LOC113805784), transcript variant X4, misc_RNA
CL3657.Contig2_All	0	11.78	10.20212382	4.50E-06	3.86E-07			XM_027380214.1 PREDICTED: Penaeus vannamei prefoldin subunit 4-like (LOC113827328), mRNA
CL524.Contig4_All	0	11.15	10.12282799	8.43E-08	5.69E-09			XM_027370114.1 PREDICTED: Penaeus vannamei superoxide dismutase [Cu-Zn]-like (LOC113817999), mRNA
CL11.Contig9_All	0	11.08	10.11374217	5.72E-134	1.50E-136		K02930//large subunit ribosomal protein L4e+ko03010//Ribosome;K02930//large subunit ribosomal protein L4e+ko03010//Ribosome;K02930//large subunit ribosomal protein L4e+ko03010//Ribosome;K02930//large subunit ribosomal protein L4e+ko03010//Ribosome;K02930//large subunit ribosomal protein L4e+ko03010//Ribosome	XM_027350820.1 PREDICTED: Penaeus vannamei 60S ribosomal protein L4-A-like (LOC113800097), transcript variant X1, mRNA	hypothetical protein C7M84_023806 [Penaeus vannamei]	Ribosomal protein L4/L1 family	[A] KOG1475 Ribosomal protein RPL1/RPL2/RL4L4	60S ribosomal protein L4-B OS=Xenopus laevis OX=8355 GN=rpl4-b PE=2 SV=2	GO:0003735//structural constituent of ribosome;GO:0005840//ribosome;GO:0006412//translation;GO:0005840//ribosome;GO:0006412//translation
Unigene21740_All	0	10.9	10.09011242	2.09E-62	1.61E-64			XM_027368486.1 PREDICTED: Penaeus vannamei tubulin alpha-1D chain-like (LOC113816410), mRNA	putative tubulin alpha-1A chain-like [Penaeus vannamei]				GO:0007017//microtubule-based process;GO:0005874//microtubule;GO:0005525//GTP binding;GO:0005200//structural constituent of cytoskeleton;GO:0005874//microtubule
CL44.Contig1_All	0	9.88	9.948367232	2.58E-242	3.32E-245		K10955//mucin-2+ko05226//Gastric cancer+ko05146//Amoebiasis;K13909//mucin-7+ko04970//Salivary secretion;K10955//mucin-2+ko05226//Gastric cancer+ko05146//Amoebiasis;K10955//mucin-2+ko05226//Gastric cancer+ko05146//Amoebiasis;K10955//mucin-2+ko05226//Gastric cancer+ko05146//Amoebiasis	XM_027364442.1 PREDICTED: Penaeus vannamei Golgi reassembly-stacking protein 2-like (LOC113812534), mRNA	Golgi reassembly-stacking protein 2-like [Penaeus vannamei] >ROT71163.1 putative Golgi reassembly-stacking protein 2 [Penaeus vannamei]	GRASP55/65 PDZ-like domain	[U] KOG3834 Golgi reassembly stacking protein GRASP65, contains PDZ domain	Golgi reassembly-stacking protein 1 OS=Rattus norvegicus OX=10116 GN=Gorasp1 PE=1 SV=4
Unigene7563_All	0	8.5	9.731319031	1.20E-06	9.46E-08
Unigene18866_All	0	8.48	9.727920455	2.40E-16	8.02E-18
CL1196.Contig4_All	0	8.11	9.663558104	1.11E-126	3.17E-129	zf-C2H2	K18749//protein LSM14;K18749//protein LSM14;K13999//cytoskeleton-associated protein 4+ko04141//Protein processing in endoplasmic reticulum;K11305//histone acetyltransferase MYST3 [EC:2.3.1.48]+ko04550//Signaling pathways regulating pluripotency of stem cells;K15157//mediator of RNA polymerase II transcription subunit 15	XM_027356243.1 PREDICTED: Penaeus vannamei protein LSM14 homolog A-like (LOC113805265), transcript variant X3, mRNA	hypothetical protein EPH_0004880 [Eimeria praecox]	FDF domain	[K] KOG3598 Thyroid hormone receptor-associated protein complex, subunit TRAP230	Adenylate cyclase, terminal-differentiation specific OS=Dictyostelium discoideum OX=44689 GN=acrA PE=1 SV=1
CL895.Contig2_All	0	8.03	9.649256178	2.17E-49	2.14E-51		K09565//peptidyl-prolyl isomerase F (cyclophilin D) [EC:5.2.1.8]+ko04022//cGMP-PKG signaling pathway+ko04020//Calcium signaling pathway+ko05145//Toxoplasmosis+ko05012//Parkinson disease+ko05016//Huntington disease;K09565//peptidyl-prolyl isomerase F (cyclophilin D) [EC:5.2.1.8]+ko04022//cGMP-PKG signaling pathway+ko04020//Calcium signaling pathway+ko05145//Toxoplasmosis+ko05012//Parkinson disease…	XM_027365771.1 PREDICTED: Penaeus vannamei peptidyl-prolyl cis-trans isomerase-like (LOC113813722), mRNA	peptidyl-prolyl cis-trans isomerase-like [Penaeus vannamei] >ROT70207.1 Peptidyl-prolyl cis-trans isomerase [Penaeus vannamei]	Cyclophilin type peptidyl-prolyl cis-trans isomerase/CLD	[O] KOG0865 Cyclophilin type peptidyl-prolyl cis-trans isomerase	Peptidyl-prolyl cis-trans isomerase OS=Drosophila melanogaster OX=7227 GN=Cyp1 PE=1 SV=2	GO:0003755//peptidyl-prolyl cis-trans isomerase activity;GO:0006457//protein folding
CL1288.Contig3_All	0	7.14	9.479780264	2.59E-31	4.40E-33			XR_003476672.1 PREDICTED: Penaeus vannamei uncharacterized LOC113816019 (LOC113816019), transcript variant X2, misc_RNA	uncharacterized protein LOC113816019 [Penaeus vannamei]
CL1787.Contig3_All	0	7.06	9.463524373	4.79E-40	6.20E-42			XM_027367743.1 PREDICTED: Penaeus vannamei DNA damage-inducible transcript 4-like protein (LOC113815721), mRNA
CL150.Contig2_All	0	6.77	9.403012024	3.23E-05	3.18E-06		K12040//solute carrier family 9 (sodium/hydrogen exchanger), member 3+ko04978//Mineral absorption+ko04974//Protein digestion and absorption+ko04976//Bile secretion+ko04964//Proximal tubule bicarbonate reclamation;K12495//IQ motif and SEC7 domain-containing protein+ko04144//Endocytosis;K07604//type I keratin, acidic+ko04915//Estrogen signaling pathway	AP022689.1 Epinephelus fuscoguttatus DNA, LG15, complete sequence	Uncharacterized protein APZ42_022249 [Daphnia magna]			Histidine-rich glycoprotein OS=Homo sapiens OX=9606 GN=HRG PE=1 SV=1	GO:0003677//DNA binding
CL1230.Contig5_All	0	6.73	9.394462695	2.33E-06	1.91E-07		K07374//tubulin alpha+ko04145//Phagosome+ko05130//Pathogenic Escherichia coli infection+ko04210//Apoptosis+ko04540//Gap junction+ko04530//Tight junction;K07374//tubulin alpha+ko04145//Phagosome+ko05130//Pathogenic Escherichia coli infection+ko04210//Apoptosis+ko04540//Gap junction+ko04530//Tight junction	XM_027368486.1 PREDICTED: Penaeus vannamei tubulin alpha-1D chain-like (LOC113816410), mRNA	Tubulin alpha-1C chain [Armadillidium nasatum]		[Z] KOG1376 Alpha tubulin	Tubulin alpha-1D chain OS=Bos taurus OX=9913 GN=TUBA1D PE=1 SV=1	GO:0005200//structural constituent of cytoskeleton;GO:0005874//microtubule;GO:0005874//microtubule;GO:0005737//cytoplasm;GO:0003924//GTPase activity;GO:0005737//cytoplasm;GO:0005525//GTP binding;GO:0007017//microtubule-based process
Unigene20940_All	0	6.4	9.321928095	8.71E-06	7.79E-07
CL2439.Contig1_All	0	6.28	9.294620749	5.18E-53	4.66E-55			XM_027351227.1 PREDICTED: Penaeus vannamei importin subunit beta-1-like (LOC113800451), transcript variant X2, mRNA
CL2433.Contig7_All	0	6.14	9.262094845	9.68E-79	5.31E-81		K13184//ATP-dependent RNA helicase A [EC:3.6.4.13];K13184//ATP-dependent RNA helicase A [EC:3.6.4.13];K13184//ATP-dependent RNA helicase A [EC:3.6.4.13];K13184//ATP-dependent RNA helicase A [EC:3.6.4.13];K13184//ATP-dependent RNA helicase A [EC:3.6.4.13]	XM_027352733.1 PREDICTED: Penaeus vannamei ATP-dependent RNA helicase A-like (LOC113802200), transcript variant X2, mRNA	Dosage compensation regulator [Penaeus vannamei]	Helicase conserved C-terminal domain	[K] KOG0921 Dosage compensation complex, subunit MLE	ATP-dependent RNA helicase A OS=Bos taurus OX=9913 GN=DHX9 PE=1 SV=1	GO:0003723//RNA binding;GO:0005524//ATP binding;GO:0004386//helicase activity
Unigene24794_All	0	5.93	9.211888295	1.63E-23	3.79E-25			XM_027383026.1 PREDICTED: Penaeus vannamei myosuppressin-like (LOC113829851), mRNA	myosuppressin-like [Penaeus vannamei]			Myosuppressin OS=Apis mellifera OX=7460 PE=1 SV=1	GO:0007218//neuropeptide signaling pathway;GO:0007218//neuropeptide signaling pathway;GO:0007218//neuropeptide signaling pathway;GO:0007218//neuropeptide signaling pathway;GO:0007218//neuropeptide signaling pathway
CL276.Contig8_All	0	5.4	9.076815597	3.83E-88	1.83E-90	bHLH	K12842//U2-associated protein SR140+ko03040//Spliceosome;K12842//U2-associated protein SR140+ko03040//Spliceosome;K12842//U2-associated protein SR140+ko03040//Spliceosome;K12842//U2-associated protein SR140+ko03040//Spliceosome;K12842//U2-associated protein SR140+ko03040//Spliceosome	XM_027352156.1 PREDICTED: Penaeus vannamei U2 snRNP-associated SURP motif-containing protein-like (LOC113801328), mRNA	U2 snRNP-associated SURP motif-containing protein-like [Penaeus vannamei]	RNA recognition motif. (a.k.a. RRM, RBD, or RNP domain)	[R] KOG0151 Predicted splicing regulator, contains RRM, SWAP and RPR domains	U2 snRNP-associated SURP motif-containing protein OS=Pongo abelii OX=9601 GN=U2SURP PE=2 SV=1	GO:0003723//RNA binding;GO:0006396//RNA processing;GO:0006396//RNA processing
CL1707.Contig3_All	0	5.32	9.055282436	5.14E-22	1.27E-23			XM_027363540.1 PREDICTED: Penaeus vannamei uncharacterized LOC113811741 (LOC113811741), transcript variant X1, mRNA	uncharacterized protein LOC113811741 isoform X1 [Penaeus vannamei] >XP_027219342.1 uncharacterized protein LOC113811741 isoform X1 [Penaeus vannamei] >XP_027219343.1 uncharacterized protein LOC113811741 isoform X1 [Penaeus vannamei] >XP_027219344.1 uncharacterized protein LOC113811741 isoform X1 [Penaeus vannamei] >ROT71767.1 hypothetical protein C7M84_009898 [Penaeus vannamei]	Domain of unknown function (DUF4728)			GO:0016021//integral component of membrane
CL320.Contig2_All	0	5.29	9.047123912	3.70E-42	4.53E-44		K16340//PH domain and leucine-rich repeat-containing protein phosphatase [EC:3.1.3.16]+ko04151//PI3K-Akt signaling pathway	XM_027354948.1 PREDICTED: Penaeus vannamei uncharacterized LOC113804113 (LOC113804113), mRNA	uncharacterized protein LOC113804113 [Penaeus vannamei]	Domain of unknown function (DUF4612)	[R] KOG1995 Conserved Zn-finger protein	Putative protein TPRXL OS=Homo sapiens OX=9606 GN=TPRXL PE=5 SV=2
CL2308.Contig3_All	0	5.26	9.038918989	3.35E-74	2.01E-76		K01874//methionyl-tRNA synthetase [EC:6.1.1.10]+ko00970//Aminoacyl-tRNA biosynthesis+ko00450//Selenocompound metabolism;K01874//methionyl-tRNA synthetase [EC:6.1.1.10]+ko00970//Aminoacyl-tRNA biosynthesis+ko00450//Selenocompound metabolism;K01874//methionyl-tRNA synthetase [EC:6.1.1.10]+ko00970//Aminoacyl-tRNA biosynthesis+ko00450//Selenocompound metabolism;K01874//methionyl-tRNA synthetase [EC:6…	XM_027374811.1 PREDICTED: Penaeus vannamei methionine--tRNA ligase, cytoplasmic-like (LOC113822264), mRNA	methionine--tRNA ligase, cytoplasmic-like [Penaeus vannamei]	tRNA synthetases class I (M)	[J] KOG1247 Methionyl-tRNA synthetase	Methionine--tRNA ligase, cytoplasmic OS=Xenopus laevis OX=8355 GN=mars1 PE=2 SV=1	GO:0004825//methionine-tRNA ligase activity;GO:0005524//ATP binding;GO:0006431//methionyl-tRNA aminoacylation;GO:0006431//methionyl-tRNA aminoacylation
CL529.Contig1_All	0	5.24	9.033423002	1.24E-291	1.19E-294		K10691//E3 ubiquitin-protein ligase UBR4 [EC:2.3.2.27]+ko05203//Viral carcinogenesis+ko05165//Human papillomavirus infection;K10691//E3 ubiquitin-protein ligase UBR4 [EC:2.3.2.27]+ko05203//Viral carcinogenesis+ko05165//Human papillomavirus infection;K10691//E3 ubiquitin-protein ligase UBR4 [EC:2.3.2.27]+ko05203//Viral carcinogenesis+ko05165//Human papillomavirus infection;K10691//E3 ubiquitin-pro…	XM_027358795.1 PREDICTED: Penaeus vannamei E3 ubiquitin-protein ligase UBR4-like (LOC113807524), mRNA	LOW QUALITY PROTEIN: E3 ubiquitin-protein ligase UBR4-like [Penaeus vannamei]	E3 ubiquitin-protein ligase UBR4	[T] KOG1776 Zn-binding protein Push	E3 ubiquitin-protein ligase UBR4 OS=Homo sapiens OX=9606 GN=UBR4 PE=1 SV=1	GO:0008270//zinc ion binding
Unigene23519_All	0	4.99	8.962896005	0.00081281	0.000106675		K10373//tropomyosin 1+ko05414//Dilated cardiomyopathy (DCM)+ko05410//Hypertrophic cardiomyopathy (HCM)+ko04261//Adrenergic signaling in cardiomyocytes+ko04260//Cardiac muscle contraction+ko05206//MicroRNAs in cancer;K10373//tropomyosin 1+ko05414//Dilated cardiomyopathy (DCM)+ko05410//Hypertrophic cardiomyopathy (HCM)+ko04261//Adrenergic signaling in cardiomyocytes+ko04260//Cardiac muscle contract…	XM_027373336.1 PREDICTED: Penaeus vannamei tropomyosin (LOC113820940), transcript variant X24, mRNA	tropomyosin isoform X17 [Penaeus vannamei] >XP_027229138.1 tropomyosin isoform X17 [Penaeus vannamei] >A1KYZ2.1 RecName: Full=Tropomyosin; AltName: Full=Tropomyosin, fast isoform; Short=Tm-Penm-fast [Penaeus monodon] >Q3Y8M6.1 RecName: Full=Tropomyosin Pen a 1.0102; AltName: Full=Allergen Pen a 1; AltName: Full=Tropomyosin Pen a 1; AltName: Allergen=Pen a 1.0102 [Penaeus aztecus] >ADA70137.1 trop…		[Z] KOG1003 Actin filament-coating protein tropomyosin	Tropomyosin OS=Penaeus monodon OX=6687 GN=TM1 PE=1 SV=1	GO:0042803//protein homodimerization activity;GO:0006937//regulation of muscle contraction;GO:0006937//regulation of muscle contraction;GO:0019863//IgE binding;GO:0006937//regulation of muscle contraction
Unigene17193_All	0	4.87	8.927777962	4.59E-43	5.50E-45	zf-C2H2	K06106//cortactin+ko05130//Pathogenic Escherichia coli infection+ko05131//Shigellosis+ko05100//Bacterial invasion of epithelial cells+ko04530//Tight junction+ko05205//Proteoglycans in cancer;K06106//cortactin+ko05130//Pathogenic Escherichia coli infection+ko05131//Shigellosis+ko05100//Bacterial invasion of epithelial cells+ko04530//Tight junction+ko05205//Proteoglycans in cancer;K06106//cortactin…	XM_027358268.1 PREDICTED: Penaeus vannamei src substrate cortactin-like (LOC113807069), transcript variant X5, mRNA	src substrate cortactin-like isoform X1 [Penaeus vannamei] >XP_027214048.1 src substrate cortactin-like isoform X1 [Penaeus vannamei]	Repeat in HS1/Cortactin	[W] LSE0345 A 12S cruciferin seed storage protein/vicilin-like seed storage protein	Src substrate protein p85 OS=Gallus gallus OX=9031 GN=CTTN1 PE=1 SV=1
CL534.Contig12_All	0	4.86	8.924812504	8.32E-27	1.67E-28		K15456//protein KTI12;K15456//protein KTI12;K15456//protein KTI12;K15456//protein KTI12;K15456//protein KTI12	XM_027377121.1 PREDICTED: Penaeus vannamei protein KTI12 homolog (LOC113824379), transcript variant X2, mRNA	protein KTI12 homolog [Seriola dumerili]	Chromatin associated protein KTI12	[R] KOG3062 RNA polymerase II elongator associated protein	Protein KTI12 homolog OS=Danio rerio OX=7955 GN=kti12 PE=2 SV=2	GO:0006357//regulation of transcription by RNA polymerase II;GO:0033588//Elongator holoenzyme complex;GO:0006357//regulation of transcription by RNA polymerase II;GO:0006357//regulation of transcription by RNA polymerase II;GO:0006357//regulation of transcription by RNA polymerase II;GO:0002098//tRNA wobble uridine modification;GO:0033588//Elongator holoenzyme complex;GO:0002098//tRNA wobble urid…
CL3832.Contig2_All	0	4.82	8.912889336	0.000812691	0.000106675			XM_027370921.1 PREDICTED: Penaeus vannamei fatty-acid amide hydrolase 2-like (LOC113818729), mRNA
CL515.Contig7_All	0	4.8	8.906890596	1.80E-45	1.99E-47	bHLH	K13161//heterogeneous nuclear ribonucleoprotein R;K13161//heterogeneous nuclear ribonucleoprotein R;K13161//heterogeneous nuclear ribonucleoprotein R;K13161//heterogeneous nuclear ribonucleoprotein R;K13161//heterogeneous nuclear ribonucleoprotein R	XM_027361774.1 PREDICTED: Penaeus vannamei heterogeneous nuclear ribonucleoprotein R-like (LOC113810089), mRNA	HnRNP R/Q splicing factor [Trinorchestia longiramus]	RNA recognition motif. (a.k.a. RRM, RBD, or RNP domain)	[A] KOG0117 Heterogeneous nuclear ribonucleoprotein R (RRM superfamily)	Heterogeneous nuclear ribonucleoprotein R OS=Homo sapiens OX=9606 GN=HNRNPR PE=1 SV=1
CL2073.Contig3_All	0	4.66	8.864186145	3.20E-07	2.32E-08			LR778259.1 Coregonus sp. 'balchen' genome assembly, chromosome: 7
CL2941.Contig4_All	0	4.55	8.829722735	6.11E-67	4.25E-69	TF_bZIP	K09050//cAMP response element-binding protein, invertebrate;K09050//cAMP response element-binding protein, invertebrate;K09050//cAMP response element-binding protein, invertebrate;K09050//cAMP response element-binding protein, invertebrate;K09050//cAMP response element-binding protein, invertebrate	XM_027358934.1 PREDICTED: Penaeus vannamei cyclic AMP-responsive element-binding protein 1-like (LOC113807625), mRNA	cAMP-responsive element binding protein, partial [Procambarus clarkii]	bZIP transcription factor	[K] KOG3584 cAMP response element binding protein and related transcription factors		GO:0005634//nucleus;GO:0003700//DNA-binding transcription factor activity;GO:0003677//DNA binding;GO:0005634//nucleus
Unigene19970_All	0	4.52	8.820178962	7.44E-15	2.69E-16		K08606//meprin B [EC:3.4.24.63]+ko04974//Protein digestion and absorption;K10955//mucin-2+ko05226//Gastric cancer+ko05146//Amoebiasis;K10955//mucin-2+ko05226//Gastric cancer+ko05146//Amoebiasis;K10955//mucin-2+ko05226//Gastric cancer+ko05146//Amoebiasis;K21125//mucin-5AC+ko04657//IL-17 signaling pathway	XM_027363723.1 PREDICTED: Penaeus vannamei uncharacterized LOC113811880 (LOC113811880), mRNA	uncharacterized protein LOC113811880 [Penaeus vannamei]	Nucleoporin Nup214 phenylalanine-glycine (FG) domain	[PT] KOG3599 Ca2+-modulated nonselective cation channel polycystin	Location of vulva defective 1 OS=Caenorhabditis elegans OX=6239 GN=lov-1 PE=1 SV=4
CL312.Contig3_All	0	4.37	8.77148947	3.25E-23	7.66E-25			XM_027380182.1 PREDICTED: Penaeus vannamei B-cell CLL/lymphoma 7 protein family member A-like (LOC113827288), mRNA	B-cell CLL/lymphoma 7 protein family member A-like [Penaeus vannamei]	BCL7, N-terminal conserver region	[R] KOG4095 Uncharacterized conserved protein (tumor-specific protein BCL7 in humans)	B-cell CLL/lymphoma 7 protein family member A OS=Danio rerio OX=7955 GN=bcl7a PE=2 SV=1
CL454.Contig6_All	0	4.34	8.761551232	4.50E-06	3.86E-07				hypothetical protein LOTGIDRAFT_148645 [Lottia gigantea] >ESP04082.1 hypothetical protein LOTGIDRAFT_148645 [Lottia gigantea]				GO:0033063//Rad51B-Rad51C-Rad51D-XRCC2 complex;GO:0003677//DNA binding;GO:0033063//Rad51B-Rad51C-Rad51D-XRCC2 complex;GO:0000724//double-strand break repair via homologous recombination;GO:0005524//ATP binding;GO:0008094//DNA-dependent ATPase activity;GO:0000724//double-strand break repair via homologous recombination;GO:0033063//Rad51B-Rad51C-Rad51D-XRCC2 complex;GO:0000724//double-strand break …
Unigene18246_All	0	4.27	8.73809226	6.75E-12	3.03E-13			XM_027379116.1 PREDICTED: Penaeus vannamei U8-agatoxin-Ao1a-like (LOC113826242), mRNA
CL124.Contig4_All	0	4.24	8.727920455	7.05E-135	1.82E-137		K15712//E3 ubiquitin-protein ligase TTC3 [EC:2.3.2.27];K15712//E3 ubiquitin-protein ligase TTC3 [EC:2.3.2.27];K15712//E3 ubiquitin-protein ligase TTC3 [EC:2.3.2.27];K15712//E3 ubiquitin-protein ligase TTC3 [EC:2.3.2.27];K15712//E3 ubiquitin-protein ligase TTC3 [EC:2.3.2.27]	XM_027375465.1 PREDICTED: Penaeus vannamei uncharacterized LOC113822926 (LOC113822926), mRNA	uncharacterized protein LOC113822926 [Penaeus vannamei]	Family of unknown function (DUF5861)	[O] KOG0548 Molecular co-chaperone STI1	E3 ubiquitin-protein ligase TTC3 OS=Mus musculus OX=10090 GN=Ttc3 PE=1 SV=2	GO:0003723//RNA binding
Unigene21031_All	0	4.2	8.714245518	8.71E-06	7.79E-07			XM_027359278.1 PREDICTED: Penaeus vannamei transferrin-like (LOC113807950), mRNA	LOW QUALITY PROTEIN: transferrin-like [Penaeus vannamei]				GO:0005576//extracellular region;GO:0005615//extracellular space
Unigene20849_All	0	4.11	8.682994584	5.77E-09	3.42E-10			LR597478.1 Sphaeramia orbicularis genome assembly, chromosome: 21
Unigene22369_All	0	4.01	8.647458426	0.000118699	1.30E-05			XM_027364653.1 PREDICTED: Penaeus vannamei tubulin alpha-1A chain (LOC113812727), mRNA
Unigene21332_All	0	3.91	8.611024797	4.50E-06	3.86E-07			XM_027365551.1 PREDICTED: Penaeus vannamei uncharacterized LOC113813542 (LOC113813542), mRNA	uncharacterized protein LOC113813542 [Penaeus vannamei]		[R] LSE0026 A Ripening-related protein
CL208.Contig1_All	0.04	15.51	8.598982971	3.07E-227	4.17E-230		K03257//translation initiation factor 4A+ko03013//RNA transport;K03257//translation initiation factor 4A+ko03013//RNA transport;K03257//translation initiation factor 4A+ko03013//RNA transport;K03257//translation initiation factor 4A+ko03013//RNA transport	XM_027364393.1 PREDICTED: Penaeus vannamei eukaryotic initiation factor 4A-II-like (LOC113812494), transcript variant X1, mRNA	eukaryotic initiation factor 4A [Penaeus vannamei]	Helicase conserved C-terminal domain	[J] KOG0327 Translation initiation factor 4F, helicase subunit (eIF-4A) and related helicases	Eukaryotic initiation factor 4A-II OS=Gallus gallus OX=9031 GN=EIF4A2 PE=2 SV=1	GO:0003743//translation initiation factor activity;GO:0004386//helicase activity;GO:0005524//ATP binding;GO:0003743//translation initiation factor activity
CL1081.Contig3_All	0	3.75	8.550746785	2.59E-63	1.95E-65		K14000//ribosome-binding protein 1+ko04141//Protein processing in endoplasmic reticulum;K14000//ribosome-binding protein 1+ko04141//Protein processing in endoplasmic reticulum;K14000//ribosome-binding protein 1+ko04141//Protein processing in endoplasmic reticulum;K14000//ribosome-binding protein 1+ko04141//Protein processing in endoplasmic reticulum;K14000//ribosome-binding protein 1+ko04141//Pro…	XM_027367075.1 PREDICTED: Penaeus vannamei ribosome-binding protein 1-like (LOC113814996), transcript variant X1, mRNA	ribosome-binding protein 1-like isoform X1 [Penaeus vannamei]	Apg6 coiled-coil region	[Z] KOG0161 Myosin class II heavy chain	Ribosome-binding protein 1 OS=Canis lupus familiaris OX=9615 GN=RRBP1 PE=2 SV=1	GO:0030176//integral component of endoplasmic reticulum membrane
CL960.Contig10_All	0	3.74	8.54689446	1.67E-51	1.56E-53			XR_003476060.1 PREDICTED: Penaeus vannamei uncharacterized LOC113809342 (LOC113809342), ncRNA	uncharacterized protein LOC113809438 isoform X1 [Penaeus vannamei] >ROT80414.1 hypothetical protein C7M84_000864 [Penaeus vannamei]
CL378.Contig5_All	0	3.71	8.535275377	5.42E-50	5.25E-52		K09173//regulatory factor X 1/2/3;K05287//phosphatidylinositol glycan, class F [EC:2.7.-.-]+ko00563//Glycosylphosphatidylinositol (GPI)-anchor biosynthesis+ko01100//Metabolic pathways	XM_027378747.1 PREDICTED: Penaeus vannamei methyltransferase-like protein 25 (LOC113825890), transcript variant X12, mRNA	methyltransferase-like protein 25 isoform X2 [Penaeus vannamei] >XP_027234538.1 methyltransferase-like protein 25 isoform X2 [Penaeus vannamei] >XP_027234540.1 methyltransferase-like protein 25 isoform X2 [Penaeus vannamei] >XP_027234541.1 methyltransferase-like protein 25 isoform X2 [Penaeus vannamei] >XP_027234542.1 methyltransferase-like protein 25 isoform X2 [Penaeus vannamei] >XP_027234543.1…	Methyltransferase domain	[A] KOG2651 rRNA adenine N-6-methyltransferase
CL1553.Contig2_All	0	3.67	8.519636253	7.79E-18	2.39E-19			XM_027352829.1 PREDICTED: Penaeus vannamei uncharacterized LOC113802284 (LOC113802284), mRNA	LOW QUALITY PROTEIN: spectrin alpha chain, non-erythrocytic 1-like, partial [Penaeus vannamei]				GO:0003779//actin binding;GO:0005543//phospholipid binding
Unigene25733_All	0	3.66	8.515699838	2.21E-08	1.40E-09			XM_027366194.1 PREDICTED: Penaeus vannamei uncharacterized LOC113814172 (LOC113814172), mRNA	uncharacterized protein LOC113814172 [Penaeus vannamei]	Domain of unknown function (DUF4728)
Unigene17652_All	0	3.63	8.503825738	2.00E-10	1.02E-11			XM_027367781.1 PREDICTED: Penaeus vannamei molt-inhibiting hormone-like (LOC113815764), transcript variant X2, mRNA
Unigene19131_All	0	3.61	8.495855027	7.44E-15	2.69E-16			XM_027361568.1 PREDICTED: Penaeus vannamei uncharacterized LOC113809894 (LOC113809894), mRNA
Unigene21671_All	0	3.5	8.451211112	1.68E-05	1.57E-06			XM_027360926.1 PREDICTED: Penaeus vannamei golgin subfamily A member 6-like protein 22 (LOC113809357), transcript variant X2, mRNA	golgin subfamily A member 6-like protein 22 isoform X1 [Penaeus vannamei]	Coiled-coil domain containing 32			GO:0019900//kinase binding;GO:0008017//microtubule binding;GO:0016301//kinase activity
CL3598.Contig1_All	0	3.5	8.451211112	3.93E-36	5.75E-38			XM_027376623.1 PREDICTED: Penaeus vannamei probable RNA-binding protein 18 (LOC113823897), transcript variant X2, mRNA	probable RNA-binding protein 18 isoform X2 [Penaeus vannamei]	RNA recognition motif. (a.k.a. RRM, RBD, or RNP domain)		Probable RNA-binding protein 18 OS=Xenopus laevis OX=8355 GN=rbm18 PE=2 SV=1	GO:0003723//RNA binding
Unigene19851_All	0	3.48	8.442943496	1.20E-06	9.46E-08			XM_027359910.1 PREDICTED: Penaeus vannamei translation initiation factor IF-2-like (LOC113808493), mRNA	uncharacterized protein LOC113808493 [Penaeus vannamei]	Microtubule-associated protein CRIPT
Unigene18249_All	0	3.47	8.438791853	1.51E-09	8.39E-11		K06485//integrin alpha 6+ko05414//Dilated cardiomyopathy (DCM)+ko05410//Hypertrophic cardiomyopathy (HCM)+ko05412//Arrhythmogenic right ventricular cardiomyopathy (ARVC)+ko04640//Hematopoietic cell lineage+ko04810//Regulation of actin cytoskeleton+ko05222//Small cell lung cancer+ko04512//ECM-receptor interaction+ko04510//Focal adhesion+ko04514//Cell adhesion molecules (CAMs)+ko05145//Toxoplasmosi…	XM_027380316.1 PREDICTED: Penaeus vannamei integrin alpha-PS3-like (LOC113827435), mRNA	integrin alpha-PS3-like [Penaeus vannamei]	Lysine-rich CEACAM1 co-isolated protein family	[W] KOG3637 Vitronectin receptor, alpha subunit	Integrin alpha-5 OS=Mus musculus OX=10090 GN=Itga5 PE=1 SV=3	GO:0008305//integrin complex;GO:0007229//integrin-mediated signaling pathway;GO:0007229//integrin-mediated signaling pathway;GO:0007155//cell adhesion;GO:0007155//cell adhesion;GO:0007229//integrin-mediated signaling pathway;GO:0008305//integrin complex;GO:0007229//integrin-mediated signaling pathway;GO:0007229//integrin-mediated signaling pathway
CL1668.Contig3_All	0	3.43	8.422064766	0.000118804	1.30E-05			XM_027355520.1 PREDICTED: Penaeus vannamei uncharacterized LOC113804631 (LOC113804631), mRNA
Unigene23492_All	0	3.36	8.392317423	0.000812217	0.000106675			XM_027358709.1 PREDICTED: Penaeus vannamei solute carrier family 28 member 3-like (LOC113807443), transcript variant X2, mRNA
CL1204.Contig9_All	0	3.3	8.366322214	6.12E-67	4.25E-69		K20641//Rho GTPase-activating protein 20;K20641//Rho GTPase-activating protein 20;K20641//Rho GTPase-activating protein 20;K20641//Rho GTPase-activating protein 20;K20641//Rho GTPase-activating protein 20	XM_027362608.1 PREDICTED: Penaeus vannamei uncharacterized LOC113810935 (LOC113810935), transcript variant X3, mRNA	uncharacterized protein LOC113810923 [Penaeus vannamei]	RhoGAP domain	[R] KOG3564 GTPase-activating protein	Rho GTPase-activating protein 20 OS=Homo sapiens OX=9606 GN=ARHGAP20 PE=1 SV=2
CL2291.Contig2_All	0	3.22	8.330916878	1.73E-12	7.44E-14	zf-C2H2	K10388//plectin;K17751//myosin heavy chain 6/7+ko05416//Viral myocarditis+ko04261//Adrenergic signaling in cardiomyocytes+ko04260//Cardiac muscle contraction;K16481//pericentrin;K16464//centrosomal protein CEP250;K10388//plectin	XM_027359388.1 PREDICTED: Penaeus vannamei microtubule-associated tumor suppressor 1 homolog A-like (LOC113808071), mRNA	microtubule-associated tumor suppressor 1 homolog A-like [Penaeus vannamei]	Bacterial protein of unknown function (DUF948)	[Z] KOG0516 Dystonin, GAS (Growth-arrest-specific protein), and related proteins	Microtubule-associated tumor suppressor candidate 2 OS=Homo sapiens OX=9606 GN=MTUS2 PE=1 SV=3
CL51.Contig3_All	0	3.21	8.326429487	8.43E-08	5.69E-09		K13149//integrator complex subunit 12;K13149//integrator complex subunit 12;K13149//integrator complex subunit 12;K13149//integrator complex subunit 12;K13149//integrator complex subunit 12	XM_027366176.1 PREDICTED: Penaeus vannamei integrator complex subunit 12-like (LOC113814106), transcript variant X4, mRNA	integrator complex subunit 12-like isoform X3 [Penaeus vannamei]	PHD-finger	[R] KOG4323 Polycomb-like PHD Zn-finger protein	Integrator complex subunit 12 OS=Mus musculus OX=10090 GN=Ints12 PE=1 SV=1	GO:0016180//snRNA processing;GO:0046872//metal ion binding;GO:0016180//snRNA processing
Unigene22424_All	0	3.21	8.326429487	0.000429754	5.28E-05			XM_027376102.1 PREDICTED: Penaeus vannamei centrosomal protein of 290 kDa-like (LOC113823453), mRNA	centrosomal protein of 290 kDa-like [Penaeus vannamei]
CL1463.Contig4_All	0	3.2	8.321928095	0.000225441	2.62E-05			LN590718.1 Cyprinus carpio genome assembly common carp genome, scaffold: LG9, chromosome: 9	kazal type protease inhibitor [Penaeus monodon]			Ovomucoid OS=Dromaius novaehollandiae OX=8790 PE=1 SV=3
Unigene23561_All	0	3.2	8.321928095	0.000429955	5.28E-05			XM_027365709.1 PREDICTED: Penaeus vannamei protein hairy-like (LOC113813678), mRNA	protein hairy-like [Penaeus vannamei] >ROT85574.1 putative protein hairy [Penaeus vannamei]				GO:0046983//protein dimerization activity
CL3654.Contig1_All	0	3.18	8.312882955	8.43E-08	5.69E-09		K16055//trehalose 6-phosphate synthase/phosphatase [EC:2.4.1.15 3.1.3.12]+ko00500//Starch and sucrose metabolism+ko01100//Metabolic pathways;K16055//trehalose 6-phosphate synthase/phosphatase [EC:2.4.1.15 3.1.3.12]+ko00500//Starch and sucrose metabolism+ko01100//Metabolic pathways;K16055//trehalose 6-phosphate synthase/phosphatase [EC:2.4.1.15 3.1.3.12]+ko00500//Starch and sucrose metabolism+ko01…	EU555435.1 Fenneropenaeus chinensis trehalose-6-phosphate synthase (TPS) mRNA, complete cds	trehalose-6-phosphate synthase [Penaeus chinensis]	Glycosyltransferase family 20	[G] KOG1050 Trehalose-6-phosphate synthase component TPS1 and related subunits	Alpha,alpha-trehalose-phosphate synthase [UDP-forming] B OS=Dictyostelium discoideum OX=44689 GN=tpsB PE=3 SV=1	GO:0003825//alpha,alpha-trehalose-phosphate synthase (UDP-forming) activity;GO:0005992//trehalose biosynthetic process;GO:0005992//trehalose biosynthetic process;GO:0003824//catalytic activity
CL1490.Contig3_All	0	3.16	8.303780748	7.80E-18	2.39E-19		K13172//serine/arginine repetitive matrix protein 2;K13172//serine/arginine repetitive matrix protein 2;K13172//serine/arginine repetitive matrix protein 2;K13172//serine/arginine repetitive matrix protein 2;K13172//serine/arginine repetitive matrix protein 2	XM_027350869.1 PREDICTED: Penaeus vannamei uncharacterized LOC113800144 (LOC113800144), transcript variant X2, mRNA	uncharacterized protein LOC113800144 isoform X2 [Penaeus vannamei]	Domain of unknown function (DUF4789)	[A] KOG4676 Splicing factor, arginine/serine-rich	Protamine OS=Phorcus turbinatus OX=43341 PE=1 SV=1
CL241.Contig1_All	0	3.15	8.299208018	8.77E-13	3.69E-14		K13171//serine/arginine repetitive matrix protein 1+ko03013//RNA transport+ko03015//mRNA surveillance pathway;K13169//splicing factor, arginine/serine-rich 17;K13171//serine/arginine repetitive matrix protein 1+ko03013//RNA transport+ko03015//mRNA surveillance pathway;K13172//serine/arginine repetitive matrix protein 2	XM_027360714.1 PREDICTED: Penaeus vannamei uncharacterized LOC113809189 (LOC113809189), transcript variant X1, mRNA	hypothetical protein C7M84_007831 [Penaeus vannamei]		[A] KOG4676 Splicing factor, arginine/serine-rich	Uncharacterized protein DDB_G0287625 OS=Dictyostelium discoideum OX=44689 GN=DDB_G0287625 PE=4 SV=1
Unigene19133_All	0	3.14	8.294620749	2.90E-14	1.10E-15			XM_027361568.1 PREDICTED: Penaeus vannamei uncharacterized LOC113809894 (LOC113809894), mRNA	uncharacterized protein LOC113809894 [Penaeus vannamei]
CL3627.Contig1_All	0	3.11	8.28077077	1.90E-39	2.53E-41		K01490//AMP deaminase [EC:3.5.4.6]+ko00230//Purine metabolism+ko01100//Metabolic pathways;K01490//AMP deaminase [EC:3.5.4.6]+ko00230//Purine metabolism+ko01100//Metabolic pathways;K01490//AMP deaminase [EC:3.5.4.6]+ko00230//Purine metabolism+ko01100//Metabolic pathways;K01490//AMP deaminase [EC:3.5.4.6]+ko00230//Purine metabolism+ko01100//Metabolic pathways;K01490//AMP deaminase [EC:3.5.4.6]+ko00…	XM_027357533.1 PREDICTED: Penaeus vannamei AMP deaminase 2-like (LOC113806421), mRNA	AMP deaminase 2-like isoform X4 [Ctenocephalides felis]	Adenosine/AMP deaminase	[F] KOG1096 Adenosine monophosphate deaminase	AMP deaminase 2 OS=Mus musculus OX=10090 GN=Ampd2 PE=1 SV=1
CL959.Contig1_All	0	3.07	8.262094845	2.89E-70	1.87E-72		K15690//RING finger and CCCH-type zinc finger domain-containing protein;K15690//RING finger and CCCH-type zinc finger domain-containing protein;K15690//RING finger and CCCH-type zinc finger domain-containing protein;K15690//RING finger and CCCH-type zinc finger domain-containing protein;K15690//RING finger and CCCH-type zinc finger domain-containing protein		Roquin-1 [Armadillidium vulgare]				GO:0046872//metal ion binding
CL21.Contig1_All	0	3.05	8.252665432	5.20E-31	8.88E-33	zf-C2HC	K14791//periodic tryptophan protein 1;K14791//periodic tryptophan protein 1;K18462//WASH complex subunit FAM21+ko04144//Endocytosis;K14791//periodic tryptophan protein 1;K14791//periodic tryptophan protein 1	XM_027374542.1 PREDICTED: Penaeus vannamei periodic tryptophan protein 1 homolog (LOC113822031), transcript variant X2, mRNA	periodic tryptophan protein 1 homolog isoform X1 [Penaeus vannamei]	WD domain, G-beta repeat	[Y] KOG2992 Nucleolar GTPase/ATPase p130	Retrotransposon-like protein 1 OS=Mus musculus OX=10090 GN=Rtl1 PE=2 SV=1
Unigene25672_All	0	3.03	8.243173983	6.18E-05	6.42E-06
Unigene24082_All	0	3.02	8.238404739	0.000118616	1.30E-05			XM_027379116.1 PREDICTED: Penaeus vannamei U8-agatoxin-Ao1a-like (LOC113826242), mRNA	U8-agatoxin-Ao1a-like [Penaeus vannamei]	Spider toxin		U8-agatoxin-Ao1a OS=Agelena orientalis OX=293813 PE=2 SV=1
Unigene25728_All	0	3.02	8.238404739	6.18E-05	6.42E-06			XM_027368000.1 PREDICTED: Penaeus vannamei diuretic hormone class 2-like (LOC113815982), mRNA	diuretic hormone class 2-like [Penaeus vannamei]			Diuretic hormone class 2 OS=Camponotus floridanus OX=104421 GN=EAG_12746 PE=1 SV=2	GO:0007589//body fluid secretion;GO:0007589//body fluid secretion;GO:0008613//diuretic hormone activity;GO:0008613//diuretic hormone activity
Unigene20553_All	0	3	8.22881869	3.94E-10	2.06E-11			XM_027378426.1 PREDICTED: Penaeus vannamei tubulin alpha-2/alpha-4 chain-like (LOC113825593), mRNA	putative tubulin alpha chain, testis-specific isoform X1 [Penaeus vannamei]			Tubulin alpha-2/alpha-4 chain OS=Patella vulgata OX=6465 GN=TUB2 PE=2 SV=1	GO:0005200//structural constituent of cytoskeleton;GO:0005737//cytoplasm;GO:0005737//cytoplasm;GO:0005874//microtubule;GO:0007017//microtubule-based process;GO:0005874//microtubule;GO:0005525//GTP binding;GO:0003924//GTPase activity
Unigene24765_All	0	2.93	8.194756854	2.25E-13	9.04E-15
Unigene23845_All	0	2.92	8.189824559	8.72E-06	7.79E-07			XM_027353790.1 PREDICTED: Penaeus vannamei uncharacterized LOC113803083 (LOC113803083), mRNA
Unigene24182_All	0	2.86	8.159871337	2.21E-08	1.40E-09			XM_027355747.1 PREDICTED: Penaeus vannamei tolloid-like protein 2 (LOC113804838), mRNA	hypothetical protein C7M84_004288 [Penaeus vannamei]				GO:0008270//zinc ion binding;GO:0004222//metalloendopeptidase activity
Unigene18402_All	0	2.84	8.14974712	2.33E-06	1.91E-07		K13172//serine/arginine repetitive matrix protein 2;K13172//serine/arginine repetitive matrix protein 2;K13172//serine/arginine repetitive matrix protein 2;K13172//serine/arginine repetitive matrix protein 2;K13172//serine/arginine repetitive matrix protein 2	XM_027355985.1 PREDICTED: Penaeus vannamei uncharacterized LOC113805073 (LOC113805073), mRNA	uncharacterized protein LOC113805073 [Penaeus vannamei]	PBP/GOBP family			GO:0005549//odorant binding
CL970.Contig4_All	0	2.83	8.144658243	1.53E-38	2.08E-40		K17512//tyrosine-protein kinase shark [EC:2.7.10.2]+ko04013//MAPK signaling pathway - fly;K17512//tyrosine-protein kinase shark [EC:2.7.10.2]+ko04013//MAPK signaling pathway - fly;K17512//tyrosine-protein kinase shark [EC:2.7.10.2]+ko04013//MAPK signaling pathway - fly;K17512//tyrosine-protein kinase shark [EC:2.7.10.2]+ko04013//MAPK signaling pathway - fly;K17512//tyrosine-protein kinase shark […	XM_027364144.1 PREDICTED: Penaeus vannamei tyrosine-protein kinase Shark-like (LOC113812277), transcript variant X4, mRNA	tyrosine-protein kinase Shark-like isoform X1 [Penaeus vannamei]	Protein tyrosine and serine/threonine kinase	[T] KOG0197 Tyrosine kinases	Tyrosine-protein kinase HTK16 OS=Hydra vulgaris OX=6087 GN=HTK16 PE=2 SV=1	GO:0005524//ATP binding;GO:0004715//non-membrane spanning protein tyrosine kinase activity
CL311.Contig2_All	0	2.77	8.113742166	2.61E-28	4.96E-30		K00326//cytochrome-b5 reductase [EC:1.6.2.2]+ko00520//Amino sugar and nucleotide sugar metabolism;K00326//cytochrome-b5 reductase [EC:1.6.2.2]+ko00520//Amino sugar and nucleotide sugar metabolism;K00326//cytochrome-b5 reductase [EC:1.6.2.2]+ko00520//Amino sugar and nucleotide sugar metabolism;K00326//cytochrome-b5 reductase [EC:1.6.2.2]+ko00520//Amino sugar and nucleotide sugar metabolism;K00326/…	XM_027375434.1 PREDICTED: Penaeus vannamei cytochrome b5 reductase 4-like (LOC113822903), transcript variant X3, mRNA	cytochrome b5 reductase 4-like isoform X3 [Penaeus vannamei]	Cytochrome b5-like Heme/Steroid binding domain	[C] KOG0536 Flavohemoprotein b5+b5R	Cytochrome b5 reductase 4 OS=Rattus norvegicus OX=10116 GN=Cyb5r4 PE=1 SV=2
Unigene17509_All	0	2.73	8.092757141	1.51E-09	8.39E-11			XM_027354298.1 PREDICTED: Penaeus vannamei uncharacterized LOC113803510 (LOC113803510), mRNA	hypothetical protein C7M84_022304 [Penaeus vannamei]
Unigene25160_All	0	2.72	8.087462841	1.68E-05	1.57E-06
CL1833.Contig2_All	0	2.69	8.071462363	4.45E-13	1.83E-14		K13510//lysophosphatidylcholine acyltransferase / lyso-PAF acetyltransferase [EC:2.3.1.23 2.3.1.67]+ko00564//Glycerophospholipid metabolism+ko00565//Ether lipid metabolism+ko01100//Metabolic pathways;K13510//lysophosphatidylcholine acyltransferase / lyso-PAF acetyltransferase [EC:2.3.1.23 2.3.1.67]+ko00564//Glycerophospholipid metabolism+ko00565//Ether lipid metabolism+ko01100//Metabolic pathways…	XM_027380853.1 PREDICTED: Penaeus vannamei lysophosphatidylcholine acyltransferase 1-like (LOC113827909), transcript variant X1, mRNA	lysophosphatidylcholine acyltransferase 1-like isoform X1 [Penaeus vannamei]	EF hand		Lysophosphatidylcholine acyltransferase 2 OS=Mus musculus OX=10090 GN=Lpcat2 PE=1 SV=1	GO:0016021//integral component of membrane;GO:0016746//transferase activity, transferring acyl groups;GO:0005509//calcium ion binding
Unigene22642_All	0	2.69	8.071462363	3.20E-07	2.32E-08			XM_027372302.1 PREDICTED: Penaeus vannamei retinitis pigmentosa 1-like 1 protein (LOC113820048), mRNA	retinitis pigmentosa 1-like 1 protein [Penaeus vannamei]
Unigene17340_All	0	2.68	8.06608919	0.000813285	0.000106675		K03250//translation initiation factor 3 subunit E+ko03013//RNA transport+ko05160//Hepatitis C;K08184//MFS transporter, MCP family, solute carrier family 16 (monocarboxylic acid transporters), member 7	LR131932.1 Cottoperca gobio genome assembly, chromosome: 24	hypothetical protein EAI_14909, partial [Harpegnathos saltator]				GO:0016021//integral component of membrane
Unigene20497_All	0	2.65	8.049848549	3.22E-05	3.18E-06			XM_027366429.1 PREDICTED: Penaeus vannamei uncharacterized LOC113814380 (LOC113814380), mRNA
CL2675.Contig2_All	0	2.6	8.022367813	1.27E-19	3.52E-21		K09498//T-complex protein 1 subunit zeta;K09498//T-complex protein 1 subunit zeta;K09498//T-complex protein 1 subunit zeta	XM_027353803.1 PREDICTED: Penaeus vannamei T-complex protein 1 subunit zeta-like (LOC113803092), mRNA	T-complex protein 1 subunit zeta-like [Penaeus vannamei]	TCP-1/cpn60 chaperonin family	[O] KOG0359 Chaperonin complex component, TCP-1 zeta subunit (CCT6)	T-complex protein 1 subunit zeta OS=Bos taurus OX=9913 GN=CCT6A PE=1 SV=3	GO:0005524//ATP binding;GO:0005737//cytoplasm;GO:0051082//unfolded protein binding;GO:0006457//protein folding;GO:0005737//cytoplasm
Unigene21360_All	0	2.6	8.022367813	0.000118595	1.30E-05		K22984//odorant receptor;K01273//membrane dipeptidase [EC:3.4.13.19];K22984//odorant receptor	EU180977.1 Litopenaeus stylirostris non-LTR retrotransposon RTE-like degenerate, partial sequence	reverse transcriptase, partial [Penaeus monodon]		[R] KOG1075 FOG: Reverse transcriptase		GO:0003964//RNA-directed DNA polymerase activity
Unigene24399_All	0	2.56	8	6.19E-07	4.69E-08		K15290//synaptotagmin-1+ko04721//Synaptic vesicle cycle;K15290//synaptotagmin-1+ko04721//Synaptic vesicle cycle;K15290//synaptotagmin-1+ko04721//Synaptic vesicle cycle;K15290//synaptotagmin-1+ko04721//Synaptic vesicle cycle;K15290//synaptotagmin-1+ko04721//Synaptic vesicle cycle	XM_027360426.1 PREDICTED: Penaeus vannamei synaptotagmin 1-like (LOC113808922), mRNA	synaptotagmin 1-like [Penaeus vannamei]	C2 domain	[TU] KOG1028 Ca2+-dependent phospholipid-binding protein Synaptotagmin, required for synaptic vesicle and secretory granule exocytosis	Synaptotagmin 1 OS=Drosophila melanogaster OX=7227 GN=Syt1 PE=1 SV=3	GO:0005544//calcium-dependent phospholipid binding;GO:0007269//neurotransmitter secretion;GO:0016020//membrane;GO:0008021//synaptic vesicle;GO:0007269//neurotransmitter secretion;GO:0007269//neurotransmitter secretion;GO:0007269//neurotransmitter secretion;GO:0008021//synaptic vesicle
CL87.Contig2_All	0	2.54	7.988684687	1.88E-15	6.60E-17		K14855//ribosome assembly protein 4;K14855//ribosome assembly protein 4;K14855//ribosome assembly protein 4;K14855//ribosome assembly protein 4;K14855//ribosome assembly protein 4	XM_027364715.1 PREDICTED: Penaeus vannamei notchless protein homolog 1-like (LOC113812799), mRNA	putative notchless protein-like 1 [Penaeus vannamei]	WD domain, G-beta repeat	[S] KOG0271 Notchless-like WD40 repeat-containing protein	Notchless protein homolog 1 OS=Homo sapiens OX=9606 GN=NLE1 PE=1 SV=4	GO:0005730//nucleolus;GO:0005730//nucleolus
CL2031.Contig1_All	0	2.52	7.977279923	4.09E-24	9.30E-26		K04403//TAK1-binding protein 1+ko05170//Human immunodeficiency virus 1 infection+ko04380//Osteoclast differentiation+ko04668//TNF signaling pathway+ko05145//Toxoplasmosis+ko05140//Leishmaniasis+ko04621//NOD-like receptor signaling pathway+ko04620//Toll-like receptor signaling pathway+ko04010//MAPK signaling pathway+ko04064//NF-kappa B signaling pathway+ko05161//Hepatitis B+ko05169//Epstein-Barr v…	XM_027369184.1 PREDICTED: Penaeus vannamei TGF-beta-activated kinase 1 and MAP3K7-binding protein 1-like (LOC113817175), transcript variant X1, mRNA	TGF-beta-activated kinase 1 and MAP3K7-binding protein 1-like [Penaeus vannamei] >XP_027224986.1 TGF-beta-activated kinase 1 and MAP3K7-binding protein 1-like [Penaeus vannamei] >XP_027224987.1 TGF-beta-activated kinase 1 and MAP3K7-binding protein 1-like [Penaeus vannamei] >AQY45916.1 TAK1 binding protein 1 [Penaeus vannamei] >ROT67702.1 Mitogen-activated protein kinase kinase kinase 7-interacti…	Protein phosphatase 2C	[T] KOG0698 Serine/threonine protein phosphatase	Protein phosphatase 2C 1 OS=Paramecium tetraurelia OX=5888 GN=GSPATT00029903001 PE=1 SV=2	GO:0016301//kinase activity;GO:0004722//protein serine/threonine phosphatase activity
Unigene20911_All	0	2.52	7.977279923	1.21E-16	3.97E-18			XM_027360426.1 PREDICTED: Penaeus vannamei synaptotagmin 1-like (LOC113808922), mRNA
CL3962.Contig1_All	0	2.51	7.971543554	2.40E-16	8.02E-18	Tub	K04650//nuclear receptor co-repressor 1+ko01522//Endocrine resistance+ko04919//Thyroid hormone signaling pathway+ko05202//Transcriptional misregulation in cancer;K09188//histone-lysine N-methyltransferase MLL3 [EC:2.1.1.43]+ko00310//Lysine degradation;K14972//PAX-interacting protein 1;K04498//E1A/CREB-binding protein [EC:2.3.1.48]+ko04024//cAMP signaling pathway+ko04630//Jak-STAT signaling pathwa…	XM_027380256.1 PREDICTED: Penaeus vannamei protein split ends-like (LOC113827377), mRNA	hypothetical protein EPH_0054360 [Eimeria praecox]		[R] KOG1721 FOG: Zn-finger	Adenylate cyclase, terminal-differentiation specific OS=Dictyostelium discoideum OX=44689 GN=acrA PE=1 SV=1	GO:0016301//kinase activity
CL9.Contig6_All	0	2.5	7.965784285	8.44E-08	5.69E-09			XM_027368280.1 PREDICTED: Penaeus vannamei uncharacterized LOC113816240 (LOC113816240), mRNA	uncharacterized protein LOC113816240 [Penaeus vannamei]	Spindle and kinetochore-associated protein 2
Unigene17391_All	0	2.45	7.936637939	3.20E-20	8.63E-22			XM_027371507.1 PREDICTED: Penaeus vannamei uncharacterized LOC113819274 (LOC113819274), mRNA	hypothetical protein C7M84_015902 [Penaeus vannamei]	YbbR-like protein
Unigene19134_All	0	2.43	7.924812504	0.000118825	1.30E-05		K10955//mucin-2+ko05226//Gastric cancer+ko05146//Amoebiasis;K10955//mucin-2+ko05226//Gastric cancer+ko05146//Amoebiasis;K10955//mucin-2+ko05226//Gastric cancer+ko05146//Amoebiasis;K10955//mucin-2+ko05226//Gastric cancer+ko05146//Amoebiasis;K10955//mucin-2+ko05226//Gastric cancer+ko05146//Amoebiasis	XM_027361568.1 PREDICTED: Penaeus vannamei uncharacterized LOC113809894 (LOC113809894), mRNA	mucin-2, partial [Oreochromis niloticus]		[M] LSE0601 A Pollen extensin-like protein (Pex)	Basic salivary proline-rich protein 1 OS=Homo sapiens OX=9606 GN=PRB1 PE=1 SV=3	GO:0030246//carbohydrate binding
CL9.Contig2_All	0	2.43	7.924812504	0.000225367	2.62E-05			XM_027365251.1 PREDICTED: Penaeus vannamei uncharacterized LOC113813284 (LOC113813284), transcript variant X1, mRNA	uncharacterized protein LOC113813284 isoform X1 [Penaeus vannamei] >ROT70534.1 hypothetical protein C7M84_011141 [Penaeus vannamei]	Spindle and kinetochore-associated protein 2
CL3763.Contig2_All	0	2.42	7.918863237	1.13E-08	6.91E-10			XM_027351250.1 PREDICTED: Penaeus vannamei uncharacterized LOC113800473 (LOC113800473), mRNA	uncharacterized protein LOC113800473 [Penaeus vannamei]				GO:0016021//integral component of membrane
CL2087.Contig2_All	0	2.41	7.912889336	1.68E-05	1.57E-06		K02881//large subunit ribosomal protein L18+ko03010//Ribosome	XM_027357161.1 PREDICTED: Penaeus vannamei proton channel OtopLc-like (LOC113806055), mRNA	proton channel OtopLc-like [Penaeus vannamei]	Otopetrin	[S] KOG4740 Uncharacterized conserved protein	Proton channel OTOP1 OS=Danio rerio OX=7955 GN=otop1 PE=1 SV=2	GO:0016021//integral component of membrane
Unigene11634_All	0	2.4	7.906890596	2.90E-14	1.10E-15		K20293//conserved oligomeric Golgi complex subunit 6;K20293//conserved oligomeric Golgi complex subunit 6;K20293//conserved oligomeric Golgi complex subunit 6;K20293//conserved oligomeric Golgi complex subunit 6;K20293//conserved oligomeric Golgi complex subunit 6	XM_027370002.1 PREDICTED: Penaeus vannamei conserved oligomeric Golgi complex subunit 6-like (LOC113817889), mRNA	putative conserved oligomeric Golgi complex subunit 6 [Penaeus vannamei]	Conserved oligomeric complex COG6	[S] KOG3758 Uncharacterized conserved protein	Conserved oligomeric Golgi complex subunit 6 OS=Rattus norvegicus OX=10116 GN=Cog6 PE=2 SV=1	GO:0015031//protein transport;GO:0017119//Golgi transport complex;GO:0000139//Golgi membrane;GO:0006891//intra-Golgi vesicle-mediated transport;GO:0017119//Golgi transport complex;GO:0017119//Golgi transport complex;GO:0000139//Golgi membrane;GO:0006891//intra-Golgi vesicle-mediated transport
CL3916.Contig1_All	0	2.36	7.882643049	1.14E-13	4.48E-15		K09597//signal peptide peptidase-like 2B [EC:3.4.23.-];K09597//signal peptide peptidase-like 2B [EC:3.4.23.-];K09597//signal peptide peptidase-like 2B [EC:3.4.23.-];K09597//signal peptide peptidase-like 2B [EC:3.4.23.-]	XM_027359307.1 PREDICTED: Penaeus vannamei signal peptide peptidase-like 2A (LOC113807988), transcript variant X1, mRNA	signal peptide peptidase-like 2A [Penaeus vannamei]	Signal peptide peptidase	[R] KOG2442 Uncharacterized conserved protein, contains PA domain	Signal peptide peptidase-like 2B OS=Mus musculus OX=10090 GN=Sppl2b PE=1 SV=2	GO:0004190//aspartic-type endopeptidase activity;GO:0031293//membrane protein intracellular domain proteolysis;GO:0016021//integral component of membrane;GO:0042500//aspartic endopeptidase activity, intramembrane cleaving
Unigene18247_All	0	2.31	7.851749041	1.68E-05	1.57E-06		K06483//integrin alpha 4+ko05414//Dilated cardiomyopathy (DCM)+ko05410//Hypertrophic cardiomyopathy (HCM)+ko05412//Arrhythmogenic right ventricular cardiomyopathy (ARVC)+ko04640//Hematopoietic cell lineage+ko04810//Regulation of actin cytoskeleton+ko04512//ECM-receptor interaction+ko04510//Focal adhesion+ko04514//Cell adhesion molecules (CAMs)+ko05140//Leishmaniasis+ko04672//Intestinal immune net…	XM_027380316.1 PREDICTED: Penaeus vannamei integrin alpha-PS3-like (LOC113827435), mRNA	integrin alpha-PS3-like [Penaeus vannamei]	Integrin alpha			GO:0008305//integrin complex;GO:0007155//cell adhesion;GO:0008305//integrin complex;GO:0007229//integrin-mediated signaling pathway;GO:0007229//integrin-mediated signaling pathway;GO:0007229//integrin-mediated signaling pathway;GO:0007229//integrin-mediated signaling pathway;GO:0007229//integrin-mediated signaling pathway;GO:0007155//cell adhesion
CL1401.Contig3_All	0	2.3	7.845490051	2.95E-09	1.69E-10		K12862//pleiotropic regulator 1+ko03040//Spliceosome;K12862//pleiotropic regulator 1+ko03040//Spliceosome;K12862//pleiotropic regulator 1+ko03040//Spliceosome;K12862//pleiotropic regulator 1+ko03040//Spliceosome;K12862//pleiotropic regulator 1+ko03040//Spliceosome	XM_027364001.1 PREDICTED: Penaeus vannamei pleiotropic regulator 1-like (LOC113812169), mRNA	pleiotropic regulator 1-like [Penaeus vannamei]		[A] KOG0285 Pleiotropic regulator 1	Pleiotropic regulator 1 OS=Bos taurus OX=9913 GN=PLRG1 PE=2 SV=1
CL1783.Contig2_All	0	2.29	7.839203788	0.000812573	0.000106675
CL534.Contig9_All	0	2.28	7.832890014	8.76E-13	3.69E-14		K15456//protein KTI12;K15456//protein KTI12;K15456//protein KTI12;K15456//protein KTI12;K15456//protein KTI12	XM_027377121.1 PREDICTED: Penaeus vannamei protein KTI12 homolog (LOC113824379), transcript variant X2, mRNA	KTI12-like protein, partial [Procambarus clarkii]	Chromatin associated protein KTI12	[R] KOG3062 RNA polymerase II elongator associated protein	Protein KTI12 homolog OS=Xenopus laevis OX=8355 GN=kti12 PE=2 SV=1	GO:0006357//regulation of transcription by RNA polymerase II;GO:0006357//regulation of transcription by RNA polymerase II;GO:0033588//Elongator holoenzyme complex;GO:0002098//tRNA wobble uridine modification;GO:0033588//Elongator holoenzyme complex;GO:0002098//tRNA wobble uridine modification;GO:0006357//regulation of transcription by RNA polymerase II;GO:0006357//regulation of transcription by R…
CL156.Contig4_All	0	2.26	7.820178962	1.90E-39	2.53E-41		K09228//KRAB domain-containing zinc finger protein;K09228//KRAB domain-containing zinc finger protein;K09228//KRAB domain-containing zinc finger protein;K09228//KRAB domain-containing zinc finger protein;K09228//KRAB domain-containing zinc finger protein	XM_027366442.1 PREDICTED: Penaeus vannamei zinc finger protein 467-like (LOC113814386), mRNA	zinc finger protein 710-like [Penaeus vannamei]	Zinc-finger double domain	[R] KOG1721 FOG: Zn-finger	Zinc finger protein 629 OS=Homo sapiens OX=9606 GN=ZNF629 PE=1 SV=2
CL2506.Contig4_All	0	2.26	7.820178962	7.44E-15	2.69E-16		K13216//nuclear inhibitor of protein phosphatase 1 [EC:3.1.4.-];K13216//nuclear inhibitor of protein phosphatase 1 [EC:3.1.4.-];K13216//nuclear inhibitor of protein phosphatase 1 [EC:3.1.4.-];K13216//nuclear inhibitor of protein phosphatase 1 [EC:3.1.4.-];K13216//nuclear inhibitor of protein phosphatase 1 [EC:3.1.4.-]	XM_027367582.1 PREDICTED: Penaeus vannamei nuclear inhibitor of protein phosphatase 1-like (LOC113815519), transcript variant X2, mRNA	nuclear inhibitor of protein phosphatase 1-like isoform X2 [Penaeus vannamei]	FHA domain	[R] KOG1880 Nuclear inhibitor of phosphatase-1	Nuclear inhibitor of protein phosphatase 1 OS=Bos taurus OX=9913 GN=PPP1R8 PE=1 SV=1
Unigene20978_All	0	2.21	7.787902559	3.22E-05	3.18E-06			XM_027360426.1 PREDICTED: Penaeus vannamei synaptotagmin 1-like (LOC113808922), mRNA
CL2207.Contig4_All	0	2.18	7.768184325	1.13E-08	6.91E-10
CL1201.Contig2_All	0	2.16	7.754887502	1.28E-53	1.14E-55		K12484//Rab11 family-interacting protein 1/2/5+ko04144//Endocytosis;K12484//Rab11 family-interacting protein 1/2/5+ko04144//Endocytosis;K12484//Rab11 family-interacting protein 1/2/5+ko04144//Endocytosis;K12484//Rab11 family-interacting protein 1/2/5+ko04144//Endocytosis	XM_027365423.1 PREDICTED: Penaeus vannamei rab11 family-interacting protein 1-like (LOC113813444), transcript variant X1, mRNA	rab11 family-interacting protein 1-like isoform X1 [Penaeus vannamei] >ROT85588.1 putative rab11 family-interacting protein 2 [Penaeus vannamei]	C2 domain	[T] TWOG0552 Rab-interacting recycling protein	Proteoglycan 4 OS=Mus musculus OX=10090 GN=Prg4 PE=1 SV=2	GO:0017137//Rab GTPase binding
Unigene21459_All	0	2.15	7.74819285	8.71E-06	7.79E-07
Unigene25636_All	0	2.15	7.74819285	0.000812336	0.000106675
CL571.Contig2_All	0	2.13	7.73470962	2.09E-27	4.08E-29		K10777//DNA ligase 4 [EC:6.5.1.1]+ko03450//Non-homologous end-joining;K10777//DNA ligase 4 [EC:6.5.1.1]+ko03450//Non-homologous end-joining;K10777//DNA ligase 4 [EC:6.5.1.1]+ko03450//Non-homologous end-joining;K10777//DNA ligase 4 [EC:6.5.1.1]+ko03450//Non-homologous end-joining	XM_027380919.1 PREDICTED: Penaeus vannamei DNA ligase 4-like (LOC113827965), mRNA	DNA ligase 4-like [Penaeus vannamei]	ATP dependent DNA ligase domain	[L] KOG0966 ATP-dependent DNA ligase IV	DNA ligase 4 OS=Gallus gallus OX=9031 GN=LIG4 PE=2 SV=2	GO:0051103//DNA ligation involved in DNA repair;GO:0005524//ATP binding;GO:0051103//DNA ligation involved in DNA repair;GO:0051103//DNA ligation involved in DNA repair;GO:0003677//DNA binding;GO:0003910//DNA ligase (ATP) activity;GO:0071897//DNA biosynthetic process;GO:0006310//DNA recombination;GO:0006310//DNA recombination;GO:0071897//DNA biosynthetic process
CL3477.Contig2_All	0	2.11	7.721099189	1.34E-11	6.13E-13		K21844//protein FAM126;K21844//protein FAM126;K21844//protein FAM126;K21844//protein FAM126;K21844//protein FAM126	XM_027366806.1 PREDICTED: Penaeus vannamei uncharacterized LOC113814747 (LOC113814747), mRNA	uncharacterized protein LOC113814747 [Penaeus vannamei]	Hyccin	[A] KOG4676 Splicing factor, arginine/serine-rich	Splicing regulatory glutamine/lysine-rich protein 1 OS=Homo sapiens OX=9606 GN=SREK1 PE=1 SV=1	GO:0046854//phosphatidylinositol phosphorylation;GO:0046854//phosphatidylinositol phosphorylation;GO:0005886//plasma membrane;GO:0072659//protein localization to plasma membrane;GO:0072659//protein localization to plasma membrane
Unigene20850_All	0	2.1	7.714245518	3.94E-10	2.06E-11
CL43.Contig2_All	0	2.06	7.686500527	1.88E-15	6.60E-17		K01540//sodium/potassium-transporting ATPase subunit beta+ko04024//cAMP signaling pathway+ko04022//cGMP-PKG signaling pathway+ko04919//Thyroid hormone signaling pathway+ko04918//Thyroid hormone synthesis+ko04911//Insulin secretion+ko04261//Adrenergic signaling in cardiomyocytes+ko04260//Cardiac muscle contraction+ko04978//Mineral absorption+ko04974//Protein digestion and absorption+ko04976//Bile …	XM_027380572.1 PREDICTED: Penaeus vannamei sodium/potassium-transporting ATPase subunit beta-like (LOC113827695), transcript variant X1, mRNA	sodium/potassium-transporting ATPase subunit beta-like [Penaeus vannamei] >XP_027236374.1 sodium/potassium-transporting ATPase subunit beta-like [Penaeus vannamei] >XP_027236375.1 sodium/potassium-transporting ATPase subunit beta-like [Penaeus vannamei]	Sodium / potassium ATPase beta chain	[P] KOG3927 Na+/K+ ATPase, beta subunit	Sodium/potassium-transporting ATPase subunit beta OS=Artemia franciscana OX=6661 PE=2 SV=1	GO:0006814//sodium ion transport;GO:0005890//sodium:potassium-exchanging ATPase complex;GO:0006813//potassium ion transport;GO:0005890//sodium:potassium-exchanging ATPase complex
CL3120.Contig2_All	0	2.05	7.6794801	4.09E-24	9.30E-26		K17529//uncharacterized serine/threonine-protein kinase SgK494 [EC:2.7.11.1]	XM_027357878.1 PREDICTED: Penaeus vannamei protein KIAA0100-like (LOC113806712), mRNA	protein KIAA0100-like [Penaeus vannamei]	Golgi-body localisation protein domain	[S] KOG1910 Uncharacterized conserved protein	Protein KIAA0100 OS=Homo sapiens OX=9606 GN=KIAA0100 PE=1 SV=3	GO:0016021//integral component of membrane
CL879.Contig1_All	0	2.05	7.6794801	6.75E-12	3.03E-13		K20314//arfaptin;K20314//arfaptin;K20314//arfaptin;K20314//arfaptin;K20314//arfaptin	XM_019483777.1 PREDICTED: Alligator mississippiensis ADP ribosylation factor interacting protein 2 (ARFIP2), partial mRNA	Arfaptin-2 [Armadillidium vulgare]	Arfaptin-like domain	[T] KOG3876 Arfaptin and related proteins	Arfaptin-2 OS=Bos taurus OX=9913 GN=ARFIP2 PE=2 SV=1	GO:0019904//protein domain specific binding
Unigene24963_All	0	2.04	7.672425342	6.18E-05	6.42E-06			XM_027362461.1 PREDICTED: Penaeus vannamei uncharacterized LOC113810814 (LOC113810814), mRNA
CL1081.Contig13_All	0	1.99	7.636624621	2.60E-31	4.40E-33		K14000//ribosome-binding protein 1+ko04141//Protein processing in endoplasmic reticulum;K14000//ribosome-binding protein 1+ko04141//Protein processing in endoplasmic reticulum;K14000//ribosome-binding protein 1+ko04141//Protein processing in endoplasmic reticulum;K14000//ribosome-binding protein 1+ko04141//Protein processing in endoplasmic reticulum;K14000//ribosome-binding protein 1+ko04141//Pro…	XM_027379782.1 PREDICTED: Penaeus vannamei intracellular protein transport protein USO1-like (LOC113826878), mRNA	myosin heavy chain, non-muscle-like isoform X2 [Penaeus vannamei]	Ribosome receptor lysine/proline rich region	[J] LSE3605 H Ribosome binding protein	Uncharacterized abhydrolase domain-containing protein DDB_G0269086 OS=Dictyostelium discoideum OX=44689 GN=DDB_G0269086 PE=1 SV=2	GO:0030176//integral component of endoplasmic reticulum membrane
CL2525.Contig4_All	0	1.99	7.636624621	9.49E-16	3.27E-17		K23151//methyltransferase-like protein 23 [EC:2.1.1.-];K23151//methyltransferase-like protein 23 [EC:2.1.1.-];K23151//methyltransferase-like protein 23 [EC:2.1.1.-];K23151//methyltransferase-like protein 23 [EC:2.1.1.-];K23151//methyltransferase-like protein 23 [EC:2.1.1.-]	XM_027360976.1 PREDICTED: Penaeus vannamei acyl-CoA-binding domain-containing protein 6-like (LOC113809399), mRNA	acyl-CoA-binding domain-containing protein 6-like [Penaeus vannamei]	Acyl CoA binding protein	[I] KOG0817 Acyl-CoA-binding protein	Methyltransferase-like protein 23 OS=Xenopus laevis OX=8355 GN=mettl23 PE=2 SV=1	GO:0008168//methyltransferase activity;GO:0032259//methylation;GO:0000062//fatty-acyl-CoA binding;GO:0003723//RNA binding
CL1141.Contig3_All	0	1.97	7.622051819	3.73E-15	1.33E-16		K14313//nuclear pore complex protein Nup53+ko03013//RNA transport;K14313//nuclear pore complex protein Nup53+ko03013//RNA transport;K14313//nuclear pore complex protein Nup53+ko03013//RNA transport;K14313//nuclear pore complex protein Nup53+ko03013//RNA transport;K14313//nuclear pore complex protein Nup53+ko03013//RNA transport	XM_027351435.1 PREDICTED: Penaeus vannamei nucleoporin NUP35-like (LOC113800639), transcript variant X1, mRNA	putative nucleoporin NUP53 isoform X2 [Penaeus vannamei]	Nup53/35/40-type RNA recognition motif	[D] KOG4285 Mitotic phosphoprotein	Nucleoporin NUP35 OS=Danio rerio OX=7955 GN=nup35 PE=1 SV=1	GO:0006913//nucleocytoplasmic transport;GO:0031965//nuclear membrane;GO:0003676//nucleic acid binding;GO:0006913//nucleocytoplasmic transport;GO:0005643//nuclear pore;GO:0015031//protein transport;GO:0005643//nuclear pore;GO:0051028//mRNA transport;GO:0031965//nuclear membrane;GO:0005643//nuclear pore
CL294.Contig3_All	0	1.95	7.607330314	0.000813404	0.000106675	ETS	K04376//ETS domain-containing protein Elk-4+ko05202//Transcriptional misregulation in cancer+ko04010//MAPK signaling pathway+ko05166//Human T-cell leukemia virus 1 infection;K09430//ETS domain-containing protein Elk-3 (SRF accessory protein 2);K09430//ETS domain-containing protein Elk-3 (SRF accessory protein 2);K09430//ETS domain-containing protein Elk-3 (SRF accessory protein 2)	XM_027368081.1 PREDICTED: Penaeus vannamei ETS domain-containing protein Elk-4-like (LOC113816059), mRNA	ETS domain-containing protein Elk-3 [Penaeus vannamei]	Ets-domain	[K] KOG3806 Predicted transcription factor	ETS domain-containing protein Elk-3 OS=Homo sapiens OX=9606 GN=ELK3 PE=1 SV=2	GO:0003700//DNA-binding transcription factor activity;GO:0043565//sequence-specific DNA binding;GO:0005634//nucleus;GO:0005634//nucleus
Unigene24879_All	0	1.94	7.599912842	0.000118637	1.30E-05		K06721//C-type lectin domain family 10 member A;K06560//mannose receptor, C type+ko04145//Phagosome+ko05152//Tuberculosis;K17513//C-type lectin superfamily 17 member A;K06468//low affinity immunoglobulin epsilon Fc receptor+ko04640//Hematopoietic cell lineage+ko05169//Epstein-Barr virus infection;K06560//mannose receptor, C type+ko04145//Phagosome+ko05152//Tuberculosis	XM_027373260.1 PREDICTED: Penaeus vannamei perlucin-like (LOC113820874), mRNA	perlucin-like [Penaeus vannamei]	Lectin C-type domain	[TV] KOG4297 C-type lectin	C-type lectin domain family 4 member F OS=Rattus norvegicus OX=10116 GN=Clec4f PE=1 SV=1	GO:0030246//carbohydrate binding
CL1466.Contig5_All	0.11	21.12	7.584962501	0	0		K12495//IQ motif and SEC7 domain-containing protein+ko04144//Endocytosis;K12495//IQ motif and SEC7 domain-containing protein+ko04144//Endocytosis;K12495//IQ motif and SEC7 domain-containing protein+ko04144//Endocytosis;K12495//IQ motif and SEC7 domain-containing protein+ko04144//Endocytosis;K12495//IQ motif and SEC7 domain-containing protein+ko04144//Endocytosis	XM_027358941.1 PREDICTED: Penaeus vannamei IQ motif and SEC7 domain-containing protein 1-like (LOC113807635), transcript variant X4, mRNA	IQ motif and SEC7 domain-containing protein 1-like isoform X3 [Penaeus vannamei]	Sec7 domain	[U] KOG0931 Predicted guanine nucleotide exchange factor, contains Sec7 domain	IQ motif and SEC7 domain-containing protein 3 OS=Homo sapiens OX=9606 GN=IQSEC3 PE=2 SV=3
CL1285.Contig12_All	0	1.92	7.584962501	3.07E-17	9.73E-19		K16175//protein scribble+ko04391//Hippo signaling pathway - fly+ko04390//Hippo signaling pathway+ko04530//Tight junction+ko05203//Viral carcinogenesis+ko05165//Human papillomavirus infection;K16175//protein scribble+ko04391//Hippo signaling pathway - fly+ko04390//Hippo signaling pathway+ko04530//Tight junction+ko05203//Viral carcinogenesis+ko05165//Human papillomavirus infection;K16175//protein s…	XM_027369920.1 PREDICTED: Penaeus vannamei protein lap4-like (LOC113817812), mRNA	protein lap4-like [Penaeus vannamei]	PDZ domain	[F] KOG0708 Membrane-associated guanylate kinase MAGUK (contains PDZ, SH3, HOOK and GUK domains)	Protein lap4 OS=Drosophila melanogaster OX=7227 GN=scrib PE=1 SV=1
CL1215.Contig2_All	0	1.9	7.569855608	1.14E-13	4.48E-15		K10341//WD repeat and SOCS box-containing protein 1;K10341//WD repeat and SOCS box-containing protein 1;K10341//WD repeat and SOCS box-containing protein 1;K10341//WD repeat and SOCS box-containing protein 1	XM_027376910.1 PREDICTED: Penaeus vannamei WD repeat and SOCS box-containing protein 1-like (LOC113824161), transcript variant X3, mRNA	WD repeat and SOCS box-containing protein 1-like isoform X1 [Penaeus vannamei]	WD domain, G-beta repeat	[R] KOG0266 WD40 repeat-containing protein	WD repeat and SOCS box-containing protein 1 OS=Homo sapiens OX=9606 GN=WSB1 PE=1 SV=1	GO:0035556//intracellular signal transduction;GO:0035556//intracellular signal transduction;GO:0035556//intracellular signal transduction;GO:0035556//intracellular signal transduction;GO:0035556//intracellular signal transduction
CL2230.Contig1_All	0	1.9	7.569855608	0.00042962	5.28E-05			AP022705.1 Plectropomus leopardus DNA, chromosome 6, nearly complete sequence
Unigene17269_All	0	1.89	7.562242424	7.45E-15	2.69E-16	CP2	K09275//transcription factor CP2 and related proteins;K09275//transcription factor CP2 and related proteins;K09275//transcription factor CP2 and related proteins;K09275//transcription factor CP2 and related proteins;K09275//transcription factor CP2 and related proteins	XM_027351232.1 PREDICTED: Penaeus vannamei uncharacterized LOC113800456 (LOC113800456), mRNA	uncharacterized protein LOC113800456 [Penaeus vannamei]	CP2 transcription factor	[K] KOG4091 Transcription factor	Transcription factor CP2 OS=Gallus gallus OX=9031 GN=TFCP2 PE=2 SV=1	GO:0003700//DNA-binding transcription factor activity;GO:0006357//regulation of transcription by RNA polymerase II;GO:0006357//regulation of transcription by RNA polymerase II;GO:0006357//regulation of transcription by RNA polymerase II;GO:0006357//regulation of transcription by RNA polymerase II
CL78.Contig6_All	0	1.89	7.562242424	3.26E-23	7.66E-25			XM_027352565.1 PREDICTED: Penaeus vannamei uncharacterized LOC113802101 (LOC113802101), mRNA	putative Fanconi anemia group G protein [Penaeus vannamei]				GO:0043240//Fanconi anaemia nuclear complex;GO:0036297//interstrand cross-link repair;GO:0043240//Fanconi anaemia nuclear complex;GO:0043240//Fanconi anaemia nuclear complex;GO:0036297//interstrand cross-link repair;GO:0036297//interstrand cross-link repair
CL4109.Contig1_All	0	1.89	7.562242424	0.000813048	0.000106675
CL677.Contig1_All	0	1.88	7.554588852	7.45E-15	2.69E-16		K00555//tRNA (guanine26-N2/guanine27-N2)-dimethyltransferase [EC:2.1.1.215 2.1.1.216];K00555//tRNA (guanine26-N2/guanine27-N2)-dimethyltransferase [EC:2.1.1.215 2.1.1.216];K00555//tRNA (guanine26-N2/guanine27-N2)-dimethyltransferase [EC:2.1.1.215 2.1.1.216];K00555//tRNA (guanine26-N2/guanine27-N2)-dimethyltransferase [EC:2.1.1.215 2.1.1.216];K00555//tRNA (guanine26-N2/guanine27-N2)-dimethyltransf…	XM_027356231.1 PREDICTED: Penaeus vannamei probable tRNA (guanine(26)-N(2))-dimethyltransferase (LOC113805256), transcript variant X2, mRNA	probable tRNA (guanine(26)-N(2))-dimethyltransferase isoform X1 [Penaeus vannamei]	N2,N2-dimethylguanosine tRNA methyltransferase	[J] KOG1253 tRNA methyltransferase	Probable tRNA (guanine(26)-N(2))-dimethyltransferase OS=Drosophila melanogaster OX=7227 GN=CG6388 PE=2 SV=1
Unigene18504_All	0	1.88	7.554588852	0.000813167	0.000106675		K19607//X-linked retinitis pigmentosa GTPase regulator;K19607//X-linked retinitis pigmentosa GTPase regulator;K19607//X-linked retinitis pigmentosa GTPase regulator;K19607//X-linked retinitis pigmentosa GTPase regulator;K19607//X-linked retinitis pigmentosa GTPase regulator	XM_027372302.1 PREDICTED: Penaeus vannamei retinitis pigmentosa 1-like 1 protein (LOC113820048), mRNA	retinitis pigmentosa 1-like 1 protein [Penaeus vannamei]	Family of unknown function (DUF5381)	[D] KOG1525 Sister chromatid cohesion complex Cohesin, subunit PDS5	Cilia- and flagella-associated protein 251 OS=Mus musculus OX=10090 GN=Wdr66 PE=1 SV=1
CL2916.Contig2_All	0	1.88	7.554588852	0.000429553	5.28E-05		K16830//aurora kinase A-interacting protein;K16830//aurora kinase A-interacting protein;K00162//pyruvate dehydrogenase E1 component beta subunit [EC:1.2.4.1]+ko01200//Carbon metabolism+ko00010//Glycolysis / Gluconeogenesis+ko00020//Citrate cycle (TCA cycle)+ko00620//Pyruvate metabolism+ko05230//Central carbon metabolism in cancer+ko01100//Metabolic pathways+ko04066//HIF-1 signaling pathway+ko0492…	XM_027377337.1 PREDICTED: Penaeus vannamei uncharacterized LOC113824584 (LOC113824584), mRNA	uncharacterized protein LOC113824584 [Penaeus vannamei]	Mitochondrial domain of unknown function (DUF1713)	[C] KOG0524 Pyruvate dehydrogenase E1, beta subunit
CL593.Contig3_All	0	1.87	7.54689446	4.50E-06	3.86E-07			XR_003476111.1 PREDICTED: Penaeus vannamei uncharacterized LOC113810151 (LOC113810151), ncRNA
CL1753.Contig3_All	0	1.85	7.531381461	6.09E-17	1.97E-18		K03131//transcription initiation factor TFIID subunit 6+ko03022//Basal transcription factors+ko05168//Herpes simplex infection;K03131//transcription initiation factor TFIID subunit 6+ko03022//Basal transcription factors+ko05168//Herpes simplex infection;K03131//transcription initiation factor TFIID subunit 6+ko03022//Basal transcription factors+ko05168//Herpes simplex infection;K03131//transcript…	LR584423.1 Salmo trutta genome assembly, chromosome: 31	TAF6-like RNA polymerase II factor subunit 6L [Armadillidium nasatum]	TATA box binding protein associated factor (TAF)	[K] KOG2549 Transcription initiation factor TFIID, subunit TAF6 (also component of histone acetyltransferase SAGA)	Transcription initiation factor TFIID subunit 6 OS=Xenopus laevis OX=8355 GN=taf6 PE=2 SV=3	GO:0006367//transcription initiation from RNA polymerase II promoter;GO:0046695//SLIK (SAGA-like) complex;GO:0006357//regulation of transcription by RNA polymerase II;GO:0005669//transcription factor TFIID complex;GO:0006357//regulation of transcription by RNA polymerase II;GO:0006367//transcription initiation from RNA polymerase II promoter;GO:0000124//SAGA complex;GO:0000124//SAGA complex;GO:00…
CL2966.Contig2_All	0	1.84	7.523561956	3.23E-05	3.18E-06			CP050567.1 Canis lupus familiaris breed Labrador retriever chromosome 08a
CL2421.Contig2_All	0	1.83	7.515699838	0.000812454	0.000106675		K21882//PDZ domain-containing protein 7	XM_027357161.1 PREDICTED: Penaeus vannamei proton channel OtopLc-like (LOC113806055), mRNA	hypothetical protein C7M84_005297 [Penaeus vannamei]	Otopetrin	[S] KOG4740 Uncharacterized conserved protein	Proton channel OtopLc OS=Drosophila melanogaster OX=7227 GN=OtopLc PE=3 SV=2	GO:0016021//integral component of membrane
CL904.Contig3_All	0	1.82	7.50779464	0.000225181	2.62E-05			XM_027362110.1 PREDICTED: Penaeus vannamei uncharacterized LOC113810422 (LOC113810422), mRNA	uncharacterized protein LOC113810422 [Penaeus vannamei]
CL2279.Contig1_All	0	1.81	7.499845887	2.60E-31	4.40E-33		K20478//golgin subfamily B member 1;K20478//golgin subfamily B member 1;K12478//early endosome antigen 1+ko04144//Endocytosis+ko04145//Phagosome+ko05152//Tuberculosis;K20478//golgin subfamily B member 1;K20283//golgin subfamily A member 4	XM_027382986.1 PREDICTED: Penaeus vannamei myosin-9-like (LOC113829812), mRNA	hypothetical protein C7M84_023090 [Penaeus vannamei]	Herpesvirus UL56 protein	[Z] KOG0161 Myosin class II heavy chain	Myosin-14 OS=Mus musculus OX=10090 GN=Myh14 PE=1 SV=1
CL378.Contig2_All	0	1.79	7.483815777	6.39E-20	1.74E-21		K09173//regulatory factor X 1/2/3;K05287//phosphatidylinositol glycan, class F [EC:2.7.-.-]+ko00563//Glycosylphosphatidylinositol (GPI)-anchor biosynthesis+ko01100//Metabolic pathways	XM_027378740.1 PREDICTED: Penaeus vannamei methyltransferase-like protein 25 (LOC113825890), transcript variant X5, mRNA	methyltransferase-like protein 25 isoform X2 [Penaeus vannamei] >XP_027234538.1 methyltransferase-like protein 25 isoform X2 [Penaeus vannamei] >XP_027234540.1 methyltransferase-like protein 25 isoform X2 [Penaeus vannamei] >XP_027234541.1 methyltransferase-like protein 25 isoform X2 [Penaeus vannamei] >XP_027234542.1 methyltransferase-like protein 25 isoform X2 [Penaeus vannamei] >XP_027234543.1…	Methyltransferase domain	[A] KOG2651 rRNA adenine N-6-methyltransferase	Methyltransferase-like protein 25 OS=Homo sapiens OX=9606 GN=METTL25 PE=2 SV=2	GO:0008168//methyltransferase activity;GO:0032259//methylation
CL147.Contig2_All	0	1.78	7.475733431	8.72E-06	7.79E-07		K03877//beta-1,3-galactosyltransferase 5 [EC:2.4.1.-]+ko00603//Glycosphingolipid biosynthesis - globo and isoglobo series+ko00601//Glycosphingolipid biosynthesis - lacto and neolacto series+ko01100//Metabolic pathways;K07820//beta-1,3-galactosyltransferase 2 [EC:2.4.1.86]+ko00601//Glycosphingolipid biosynthesis - lacto and neolacto series+ko01100//Metabolic pathways	XM_027369087.1 PREDICTED: Penaeus vannamei beta-1,3-galactosyltransferase 5-like (LOC113817088), transcript variant X2, mRNA	beta-1,3-galactosyltransferase 5-like isoform X2 [Penaeus vannamei]	Galactosyltransferase	[G] KOG2287 Galactosyltransferases	Beta-1,3-galactosyltransferase 5 OS=Homo sapiens OX=9606 GN=B3GALT5 PE=1 SV=1	GO:0016021//integral component of membrane;GO:0016757//transferase activity, transferring glycosyl groups;GO:0006486//protein glycosylation;GO:0000139//Golgi membrane;GO:0006486//protein glycosylation;GO:0000139//Golgi membrane
CL933.Contig8_All	0	1.78	7.475733431	2.33E-06	1.91E-07				hypothetical protein EAI_13357, partial [Harpegnathos saltator]	D1 dopamine receptor-interacting protein (calcyon)			GO:0016021//integral component of membrane
CL991.Contig1_All	0	1.76	7.459431619	3.23E-05	3.18E-06			XM_027379708.1 PREDICTED: Penaeus vannamei CBP80/20-dependent translation initiation factor-like (LOC113826818), transcript variant X1, mRNA		pinin/SDK conserved region		Uncharacterized membrane protein DDB_G0293934 OS=Dictyostelium discoideum OX=44689 GN=DDB_G0293934 PE=4 SV=1
Unigene17770_All	0	1.7	7.409390936	2.33E-06	1.91E-07			XM_027368227.1 PREDICTED: Penaeus vannamei uncharacterized LOC113816186 (LOC113816186), mRNA	uncharacterized protein LOC113816186 [Penaeus vannamei]	Viral RNA-directed RNA polymerase
CL354.Contig5_All	0	1.69	7.400879436	1.98E-36	2.85E-38	ARID	K07874//Ras-related protein Rab-1A+ko05134//Legionellosis;K07874//Ras-related protein Rab-1A+ko05134//Legionellosis;K07874//Ras-related protein Rab-1A+ko05134//Legionellosis;K07874//Ras-related protein Rab-1A+ko05134//Legionellosis;K07874//Ras-related protein Rab-1A+ko05134//Legionellosis	XM_027380256.1 PREDICTED: Penaeus vannamei protein split ends-like (LOC113827377), mRNA	protein split ends-like [Penaeus vannamei]	RBB1NT (NUC162) domain	[K] KOG2744 DNA-binding proteins Bright/BRCAA1/RBP1 and related proteins containing BRIGHT domain	AT-rich interactive domain-containing protein 4B OS=Mus musculus OX=10090 GN=Arid4b PE=1 SV=1	GO:0003677//DNA binding;GO:0005634//nucleus;GO:0005634//nucleus
CL1285.Contig13_All	0	1.68	7.392317423	1.88E-15	6.60E-17		K16175//protein scribble+ko04391//Hippo signaling pathway - fly+ko04390//Hippo signaling pathway+ko04530//Tight junction+ko05203//Viral carcinogenesis+ko05165//Human papillomavirus infection;K16175//protein scribble+ko04391//Hippo signaling pathway - fly+ko04390//Hippo signaling pathway+ko04530//Tight junction+ko05203//Viral carcinogenesis+ko05165//Human papillomavirus infection;K16175//protein s…	XM_027369920.1 PREDICTED: Penaeus vannamei protein lap4-like (LOC113817812), mRNA	protein lap4-like [Penaeus vannamei]	PDZ domain	[F] KOG0708 Membrane-associated guanylate kinase MAGUK (contains PDZ, SH3, HOOK and GUK domains)	Protein lap4 OS=Drosophila melanogaster OX=7227 GN=scrib PE=1 SV=1
CL2097.Contig6_All	0	1.67	7.383704292	3.06E-17	9.73E-19		K20362//protein transport protein YIF1;K20362//protein transport protein YIF1;K20362//protein transport protein YIF1	XM_027366780.1 PREDICTED: Penaeus vannamei protein YIF1B-B-like (LOC113814726), transcript variant X4, mRNA	protein YIF1B-B-like isoform X4 [Penaeus vannamei]	YIF1	[S] KOG3094 Predicted membrane protein	Protein YIF1B OS=Mus musculus OX=10090 GN=Yif1b PE=1 SV=2	GO:0006888//endoplasmic reticulum to Golgi vesicle-mediated transport;GO:0006888//endoplasmic reticulum to Golgi vesicle-mediated transport;GO:0016021//integral component of membrane;GO:0005789//endoplasmic reticulum membrane
Unigene23814_All	0	1.66	7.375039431	1.20E-06	9.46E-08			XM_027360426.1 PREDICTED: Penaeus vannamei synaptotagmin 1-like (LOC113808922), mRNA
CL1425.Contig3_All	0	1.65	7.366322214	2.33E-06	1.91E-07		K14713//solute carrier family 39 (zinc transporter), member 7;K22614//NLR family CARD domain-containing protein 3;K06467//CD22 antigen+ko04640//Hematopoietic cell lineage+ko04514//Cell adhesion molecules (CAMs)+ko04662//B cell receptor signaling pathway;K20804//E3 ubiquitin-protein ligase RNF34 [EC:2.3.2.31]	JN963355.1 Mus musculus targeted KO-first, conditional ready, lacZ-tagged mutant allele Dpcd:tm1a(EUCOMM)Wtsi; transgenic	hypothetical protein AMELA_G00184770, partial [Ameiurus melas]			Putative uncharacterized protein FLJ46204 OS=Homo sapiens OX=9606 PE=5 SV=2
CL1716.Contig1_All	0	1.62	7.339850003	3.42E-12	1.50E-13			XM_027351945.1 PREDICTED: Penaeus vannamei uncharacterized LOC113801102 (LOC113801102), transcript variant X5, mRNA	uncharacterized protein LOC113801102 [Penaeus vannamei] >XP_027207726.1 uncharacterized protein LOC113801102 [Penaeus vannamei] >XP_027207733.1 uncharacterized protein LOC113801102 [Penaeus vannamei] >XP_027207739.1 uncharacterized protein LOC113801102 [Penaeus vannamei] >XP_027207746.1 uncharacterized protein LOC113801102 [Penaeus vannamei] >ROT78760.1 hypothetical protein C7M84_002526 [Penaeus …	Protein of unknown function (DUF229)			GO:0003824//catalytic activity
CL78.Contig2_All	0	1.62	7.339850003	6.50E-23	1.55E-24			XM_027352565.1 PREDICTED: Penaeus vannamei uncharacterized LOC113802101 (LOC113802101), mRNA	putative Fanconi anemia group G protein [Penaeus vannamei]				GO:0043240//Fanconi anaemia nuclear complex;GO:0043240//Fanconi anaemia nuclear complex;GO:0036297//interstrand cross-link repair;GO:0043240//Fanconi anaemia nuclear complex;GO:0036297//interstrand cross-link repair;GO:0036297//interstrand cross-link repair
Unigene21889_All	0	1.61	7.330916878	0.000225404	2.62E-05
CL1141.Contig4_All	0	1.6	7.321928095	5.77E-09	3.42E-10		K14313//nuclear pore complex protein Nup53+ko03013//RNA transport;K14313//nuclear pore complex protein Nup53+ko03013//RNA transport;K14313//nuclear pore complex protein Nup53+ko03013//RNA transport;K14313//nuclear pore complex protein Nup53+ko03013//RNA transport;K14313//nuclear pore complex protein Nup53+ko03013//RNA transport	XM_027351437.1 PREDICTED: Penaeus vannamei nucleoporin NUP35-like (LOC113800639), transcript variant X2, mRNA	nucleoporin NUP35-like [Penaeus vannamei] >XP_027207238.1 nucleoporin NUP35-like [Penaeus vannamei]	Nup53/35/40-type RNA recognition motif	[D] KOG4285 Mitotic phosphoprotein	Nucleoporin NUP35 OS=Xenopus tropicalis OX=8364 GN=nup35 PE=2 SV=1	GO:0031965//nuclear membrane;GO:0051028//mRNA transport;GO:0003676//nucleic acid binding;GO:0005643//nuclear pore;GO:0005643//nuclear pore;GO:0006913//nucleocytoplasmic transport;GO:0006913//nucleocytoplasmic transport;GO:0031965//nuclear membrane;GO:0005643//nuclear pore;GO:0015031//protein transport
CL306.Contig2_All	0	1.6	7.321928095	4.77E-16	1.62E-17		K14856//protein SDA1;K14856//protein SDA1;K14856//protein SDA1;K14856//protein SDA1;K14856//protein SDA1	XM_027377050.1 PREDICTED: Penaeus vannamei protein SDA1 homolog (LOC113824302), transcript variant X2, mRNA	protein SDA1 homolog [Penaeus vannamei] >XP_027232851.1 protein SDA1 homolog [Penaeus vannamei]	SDA1	[DZ] KOG2229 Protein required for actin cytoskeleton organization and cell cycle progression	Protein SDA1 homolog OS=Bos taurus OX=9913 GN=SDAD1 PE=2 SV=1	GO:0042273//ribosomal large subunit biogenesis;GO:0000055//ribosomal large subunit export from nucleus;GO:0005634//nucleus;GO:0005730//nucleolus;GO:0005634//nucleus;GO:0030036//actin cytoskeleton organization;GO:0000055//ribosomal large subunit export from nucleus;GO:0005730//nucleolus
CL658.Contig4_All	0	1.6	7.321928095	7.17E-45	8.11E-47		K20478//golgin subfamily B member 1;K20478//golgin subfamily B member 1;K11499//centromere protein F;K20283//golgin subfamily A member 4;K20478//golgin subfamily B member 1	XM_027358561.1 PREDICTED: Penaeus vannamei golgin subfamily B member 1-like (LOC113807321), mRNA	golgin subfamily B member 1-like [Penaeus vannamei]	Crescentin protein	[D] LSE0198 H Nuclear/mitotic apparatus protein NuMA	Centrosome-associated protein CEP250 OS=Mus musculus OX=10090 GN=Cep250 PE=1 SV=4
CL276.Contig2_All	0.03	4.78	7.315904307	6.64E-90	3.09E-92		K12842//U2-associated protein SR140+ko03040//Spliceosome;K12842//U2-associated protein SR140+ko03040//Spliceosome;K12842//U2-associated protein SR140+ko03040//Spliceosome;K12842//U2-associated protein SR140+ko03040//Spliceosome;K12842//U2-associated protein SR140+ko03040//Spliceosome	XM_027352156.1 PREDICTED: Penaeus vannamei U2 snRNP-associated SURP motif-containing protein-like (LOC113801328), mRNA	U2 snRNP-associated SURP motif-containing protein-like [Penaeus vannamei]	RNA recognition motif. (a.k.a. RRM, RBD, or RNP domain)	[R] KOG0151 Predicted splicing regulator, contains RRM, SWAP and RPR domains	U2 snRNP-associated SURP motif-containing protein OS=Mus musculus OX=10090 GN=U2surp PE=1 SV=3	GO:0006396//RNA processing;GO:0006396//RNA processing;GO:0003723//RNA binding
CL105.Contig7_All	0	1.59	7.312882955	3.73E-15	1.33E-16		K12172//E3 SUMO-protein ligase RanBP2 [EC:2.3.2.-]+ko03013//RNA transport;K12172//E3 SUMO-protein ligase RanBP2 [EC:2.3.2.-]+ko03013//RNA transport;K12172//E3 SUMO-protein ligase RanBP2 [EC:2.3.2.-]+ko03013//RNA transport;K12172//E3 SUMO-protein ligase RanBP2 [EC:2.3.2.-]+ko03013//RNA transport	XM_027360642.1 PREDICTED: Penaeus vannamei RNA-binding protein cabeza-like (LOC113809143), transcript variant X3, mRNA	RNA-binding protein cabeza-like isoform X1 [Penaeus vannamei] >XP_027216442.1 RNA-binding protein cabeza-like isoform X1 [Penaeus vannamei]	Zn-finger in Ran binding protein and others	[R] KOG1995 Conserved Zn-finger protein	RNA-binding protein cabeza OS=Drosophila melanogaster OX=7227 GN=caz PE=2 SV=2	GO:0046872//metal ion binding
Unigene25910_All	0.05	7.91	7.30560579	1.11E-48	1.12E-50	zf-C2HC	K19538//retinitis pigmentosa 1;K19538//retinitis pigmentosa 1;K19607//X-linked retinitis pigmentosa GTPase regulator;K19607//X-linked retinitis pigmentosa GTPase regulator;K19607//X-linked retinitis pigmentosa GTPase regulator	XM_027358246.1 PREDICTED: Penaeus vannamei putative uncharacterized protein DDB_G0271606 (LOC113807079), mRNA	putative uncharacterized protein DDB_G0271606 [Penaeus vannamei] >ROT75384.1 hypothetical protein C7M84_006077 [Penaeus vannamei]		[GO] KOG4157 beta-1,6-N-acetylglucosaminyltransferase, contains WSC domain	Retinitis pigmentosa 1-like 1 protein OS=Homo sapiens OX=9606 GN=RP1L1 PE=1 SV=5
CL534.Contig13_All	0	1.56	7.285402219	6.19E-07	4.69E-08		K15456//protein KTI12;K15456//protein KTI12;K15456//protein KTI12;K15456//protein KTI12;K15456//protein KTI12	XM_027377121.1 PREDICTED: Penaeus vannamei protein KTI12 homolog (LOC113824379), transcript variant X2, mRNA	protein KTI12 homolog [Penaeus vannamei] >XP_027232922.1 protein KTI12 homolog [Penaeus vannamei]	Chromatin associated protein KTI12	[R] KOG3062 RNA polymerase II elongator associated protein	Protein KTI12 homolog OS=Xenopus laevis OX=8355 GN=kti12 PE=2 SV=1	GO:0033588//Elongator holoenzyme complex;GO:0006357//regulation of transcription by RNA polymerase II;GO:0002098//tRNA wobble uridine modification;GO:0006357//regulation of transcription by RNA polymerase II;GO:0006357//regulation of transcription by RNA polymerase II;GO:0006357//regulation of transcription by RNA polymerase II;GO:0002098//tRNA wobble uridine modification;GO:0033588//Elongator ho…
CL318.Contig3_All	0	1.56	7.285402219	2.60E-22	6.31E-24	Homeobox	K19538//retinitis pigmentosa 1;K19607//X-linked retinitis pigmentosa GTPase regulator;K19538//retinitis pigmentosa 1;K19607//X-linked retinitis pigmentosa GTPase regulator;K19607//X-linked retinitis pigmentosa GTPase regulator	XM_027381946.1 PREDICTED: Penaeus vannamei serrate RNA effector molecule homolog (LOC113828887), transcript variant X2, mRNA	serrate RNA effector molecule homolog isoform X2 [Penaeus vannamei] >AEI83215.1 arsenite-resistance protein 2-like protein [Penaeus vannamei]	Arsenite-resistance protein 2	[R] KOG2295 C2H2 Zn-finger protein	Serrate RNA effector molecule homolog OS=Aedes aegypti OX=7159 GN=Ars2 PE=3 SV=1	GO:0003676//nucleic acid binding;GO:0006397//mRNA processing;GO:0006397//mRNA processing
CL3924.Contig2_All	0	1.55	7.276124405	0.000118679	1.30E-05			XM_027353691.1 PREDICTED: Penaeus vannamei mpv17-like protein 2 (LOC113802994), mRNA
CL3747.Contig2_All	0	1.53	7.257387843	1.14E-13	4.48E-15			XM_027382466.1 PREDICTED: Penaeus vannamei tetratricopeptide repeat protein 5-like (LOC113829320), transcript variant X1, mRNA	tetratricopeptide repeat protein 5-like isoform X1 [Penaeus vannamei]	Tetratricopeptide repeat protein 5 OB fold domain	[R] TWOG0032 Uncharacterized conserved protein, contains TPR repeat	Tetratricopeptide repeat protein 5 OS=Homo sapiens OX=9606 GN=TTC5 PE=1 SV=2
CL515.Contig9_All	0	1.51	7.238404739	2.00E-10	1.02E-11	bHLH	K13161//heterogeneous nuclear ribonucleoprotein R;K13161//heterogeneous nuclear ribonucleoprotein R;K13161//heterogeneous nuclear ribonucleoprotein R;K13161//heterogeneous nuclear ribonucleoprotein R;K13161//heterogeneous nuclear ribonucleoprotein R	XM_027361774.1 PREDICTED: Penaeus vannamei heterogeneous nuclear ribonucleoprotein R-like (LOC113810089), mRNA	HnRNP R/Q splicing factor [Trinorchestia longiramus]	RNA recognition motif. (a.k.a. RRM, RBD, or RNP domain)	[A] KOG0117 Heterogeneous nuclear ribonucleoprotein R (RRM superfamily)	Heterogeneous nuclear ribonucleoprotein R OS=Homo sapiens OX=9606 GN=HNRNPR PE=1 SV=1
CL347.Contig6_All	0.02	2.95	7.204571144	5.22E-28	1.00E-29	zf-C2H2	K13094//RNA-binding protein 5/10;K22641//protein tweety;K13094//RNA-binding protein 5/10;K10624//E3 ubiquitin-protein ligase RBBP6 [EC:2.3.2.27]	XM_027362825.1 PREDICTED: Penaeus vannamei RNA-binding protein 5-like (LOC113811154), mRNA	RNA-binding protein 5-like [Penaeus vannamei]	Insecticidal Crystal Toxin, P42	[R] KOG3263 Nucleic acid binding protein	Uncharacterized protein DDB_G0284459 OS=Dictyostelium discoideum OX=44689 GN=DDB_G0284459 PE=4 SV=1
CL1081.Contig7_All	0	1.43	7.159871337	1.61E-20	4.28E-22		K14000//ribosome-binding protein 1+ko04141//Protein processing in endoplasmic reticulum;K14000//ribosome-binding protein 1+ko04141//Protein processing in endoplasmic reticulum;K14000//ribosome-binding protein 1+ko04141//Protein processing in endoplasmic reticulum;K14000//ribosome-binding protein 1+ko04141//Protein processing in endoplasmic reticulum;K14000//ribosome-binding protein 1+ko04141//Pro…	XM_027367075.1 PREDICTED: Penaeus vannamei ribosome-binding protein 1-like (LOC113814996), transcript variant X1, mRNA	ribosome-binding protein 1-like isoform X1 [Penaeus vannamei]	Apg6 coiled-coil region	[Z] KOG0161 Myosin class II heavy chain	Ribosome-binding protein 1 OS=Canis lupus familiaris OX=9615 GN=RRBP1 PE=2 SV=1	GO:0030176//integral component of endoplasmic reticulum membrane
CL37.Contig11_All	0	1.36	7.087462841	4.33E-08	2.82E-09		K07413//cytochrome P450 family 2 subfamily C [EC:1.14.14.1]+ko04726//Serotonergic synapse+ko00590//Arachidonic acid metabolism+ko00830//Retinol metabolism+ko04750//Inflammatory mediator regulation of TRP channels+ko05204//Chemical carcinogenesis+ko00140//Steroid hormone biosynthesis+ko00591//Linoleic acid metabolism+ko01100//Metabolic pathways;K14937//methyl farnesoate epoxidase / farnesoate epox…	XM_027375528.1 PREDICTED: Penaeus vannamei methyl farnesoate epoxidase-like (LOC113822977), mRNA	cytochrome P450 monooxygenase [Penaeus vannamei]	Cytochrome P450	[Q] KOG0156 Cytochrome P450 CYP2 subfamily	Cytochrome P450 2C11 OS=Rattus norvegicus OX=10116 GN=Cyp2c11 PE=1 SV=1	GO:0016705//oxidoreductase activity, acting on paired donors, with incorporation or reduction of molecular oxygen;GO:0020037//heme binding;GO:0005506//iron ion binding;GO:0004497//monooxygenase activity;GO:0016021//integral component of membrane
CL1081.Contig5_All	0	1.35	7.076815597	2.00E-18	5.85E-20		K14000//ribosome-binding protein 1+ko04141//Protein processing in endoplasmic reticulum;K14000//ribosome-binding protein 1+ko04141//Protein processing in endoplasmic reticulum;K14000//ribosome-binding protein 1+ko04141//Protein processing in endoplasmic reticulum;K14000//ribosome-binding protein 1+ko04141//Protein processing in endoplasmic reticulum;K14000//ribosome-binding protein 1+ko04141//Pro…	XM_027379782.1 PREDICTED: Penaeus vannamei intracellular protein transport protein USO1-like (LOC113826878), mRNA	myosin heavy chain, non-muscle-like isoform X2 [Penaeus vannamei]	Ribosome receptor lysine/proline rich region	[Z] LSE0280 A Cytoskeleton-associated protein	Ribosome-binding protein 1 OS=Canis lupus familiaris OX=9615 GN=RRBP1 PE=2 SV=1	GO:0030176//integral component of endoplasmic reticulum membrane
CL346.Contig1_All	0	1.35	7.076815597	1.47E-14	5.44E-16	zf-C2H2	K04381//stathmin+ko05206//MicroRNAs in cancer+ko04010//MAPK signaling pathway;K10955//mucin-2+ko05226//Gastric cancer+ko05146//Amoebiasis;K10955//mucin-2+ko05226//Gastric cancer+ko05146//Amoebiasis;K10955//mucin-2+ko05226//Gastric cancer+ko05146//Amoebiasis;K10955//mucin-2+ko05226//Gastric cancer+ko05146//Amoebiasis	XM_027351349.1 PREDICTED: Penaeus vannamei axoneme-associated protein mst101(2)-like (LOC113800559), mRNA	putative stathmin isoform X3 [Penaeus vannamei]	Stathmin family	[R] LSE0026 A Ripening-related protein	Acanthoscurrin-1 OS=Acanthoscurria gomesiana OX=115339 GN=acantho1 PE=1 SV=1	GO:0016021//integral component of membrane;GO:0031110//regulation of microtubule polymerization or depolymerization;GO:0031110//regulation of microtubule polymerization or depolymerization;GO:0031110//regulation of microtubule polymerization or depolymerization
CL3735.Contig2_All	0	1.34	7.06608919	2.33E-06	1.91E-07		K22380//E3 ubiquitin-protein ligase TM129 [EC:2.3.2.27];K22380//E3 ubiquitin-protein ligase TM129 [EC:2.3.2.27];K22380//E3 ubiquitin-protein ligase TM129 [EC:2.3.2.27];K22380//E3 ubiquitin-protein ligase TM129 [EC:2.3.2.27];K22380//E3 ubiquitin-protein ligase TM129 [EC:2.3.2.27]	XM_027355699.1 PREDICTED: Penaeus vannamei mycophenolic acid acyl-glucuronide esterase, mitochondrial-like (LOC113804794), transcript variant X6, mRNA	PREDICTED: E3 ubiquitin-protein ligase TM129 [Sorex araneus]	Putative transmembrane protein precursor	[S] KOG3899 Uncharacterized conserved protein	Transmembrane protein 129 OS=Gallus gallus OX=9031 GN=TMEM129 PE=2 SV=1	GO:0016021//integral component of membrane;GO:0061630//ubiquitin protein ligase activity
CL1012.Contig3_All	0	1.34	7.06608919	5.76E-09	3.42E-10			XM_027380338.1 PREDICTED: Penaeus vannamei uncharacterized LOC113827456 (LOC113827456), mRNA	uncharacterized protein LOC113827456 [Penaeus vannamei]	Helix-turn-helix of DDE superfamily endonuclease		Transcription termination factor 5, mitochondrial OS=Drosophila melanogaster OX=7227 GN=mTerf5 PE=1 SV=1
CL534.Contig15_All	0	1.32	7.044394119	6.19E-07	4.69E-08		K15456//protein KTI12;K15456//protein KTI12;K15456//protein KTI12;K15456//protein KTI12;K15456//protein KTI12	XM_027377121.1 PREDICTED: Penaeus vannamei protein KTI12 homolog (LOC113824379), transcript variant X2, mRNA	KTI12-like protein, partial [Procambarus clarkii]	Chromatin associated protein KTI12	[R] KOG3062 RNA polymerase II elongator associated protein	Protein KTI12 homolog OS=Xenopus laevis OX=8355 GN=kti12 PE=2 SV=1
CL1143.Contig3_All	0	1.32	7.044394119	2.33E-06	1.91E-07		K13218//polypyrimidine tract-binding protein 1;K13218//polypyrimidine tract-binding protein 1;K13218//polypyrimidine tract-binding protein 1;K13218//polypyrimidine tract-binding protein 1	XM_027372626.1 PREDICTED: Penaeus vannamei polypyrimidine tract-binding protein 1-like (LOC113820296), transcript variant X3, mRNA	polypyrimidine tract-binding protein 1-like isoform X3 [Penaeus vannamei]	RNA recognition motif. (a.k.a. RRM, RBD, or RNP domain)	[A] KOG1190 Polypyrimidine tract-binding protein	Polypyrimidine tract-binding protein 1 OS=Sus scrofa OX=9823 GN=PTBP1 PE=2 SV=1
CL1134.Contig4_All	0	1.32	7.044394119	2.21E-08	1.40E-09		K11432//histone-lysine N-methyltransferase PRDM2 [EC:2.1.1.43]+ko00310//Lysine degradation	XM_027373787.1 PREDICTED: Penaeus vannamei MOG interacting and ectopic P-granules protein 1-like (LOC113821291), mRNA	LOW QUALITY PROTEIN: MOG interacting and ectopic P-granules protein 1-like [Penaeus vannamei]	C2H2-type zinc finger		MOG interacting and ectopic P-granules protein 1 OS=Caenorhabditis briggsae OX=6238 GN=mep-1 PE=3 SV=2	GO:0003676//nucleic acid binding
CL379.Contig5_All	0	1.28	7	3.20E-07	2.32E-08		K00512//steroid 17alpha-monooxygenase / 17alpha-hydroxyprogesterone deacetylase [EC:1.14.14.19 1.14.14.32]+ko04917//Prolactin signaling pathway+ko04913//Ovarian steroidogenesis+ko04934//Cushing syndrome+ko00140//Steroid hormone biosynthesis+ko01100//Metabolic pathways+ko04927//Cortisol synthesis and secretion;K17854//cytochrome P450 family 2 subfamily K;K07408//cytochrome P450 family 1 subfamily …	XM_027369748.1 PREDICTED: Penaeus vannamei cytochrome P450 2L1-like (LOC113817668), mRNA	cytochrome P450 2L1-like [Penaeus vannamei]	Cytochrome P450	[Q] KOG0156 Cytochrome P450 CYP2 subfamily	Cytochrome P450 2L1 OS=Panulirus argus OX=6737 GN=CYP2L1 PE=1 SV=1	GO:0005506//iron ion binding;GO:0016705//oxidoreductase activity, acting on paired donors, with incorporation or reduction of molecular oxygen;GO:0004497//monooxygenase activity;GO:0020037//heme binding
Unigene17111_All	0	1.24	6.95419631	1.61E-20	4.28E-22		K05096//FMS-like tyrosine kinase 1 [EC:2.7.10.1]+ko04510//Focal adhesion+ko05323//Rheumatoid arthritis+ko05202//Transcriptional misregulation in cancer+ko04151//PI3K-Akt signaling pathway+ko04010//MAPK signaling pathway+ko04014//Ras signaling pathway+ko04015//Rap1 signaling pathway+ko04066//HIF-1 signaling pathway;K05096//FMS-like tyrosine kinase 1 [EC:2.7.10.1]+ko04510//Focal adhesion+ko05323//R…	XM_027351569.1 PREDICTED: Penaeus vannamei platelet-derived growth factor receptor alpha-like (LOC113800792), transcript variant X1, mRNA	putative vascular endothelial growth factor receptor 1-like isoform X1 [Penaeus vannamei]	Protein tyrosine and serine/threonine kinase	[T] KOG0200 Fibroblast/platelet-derived growth factor receptor and related receptor tyrosine kinases	Vascular endothelial growth factor receptor 2 OS=Coturnix japonica OX=93934 GN=KDR PE=1 SV=1	GO:0005524//ATP binding;GO:0004713//protein tyrosine kinase activity;GO:0016021//integral component of membrane
CL3330.Contig1_All	0	1.23	6.942514505	2.40E-16	8.02E-18		K16502//cadherin-related family member 2;K12740//NK-tumor recognition protein;K13168//splicing factor, arginine/serine-rich 16;K13172//serine/arginine repetitive matrix protein 2;K10955//mucin-2+ko05226//Gastric cancer+ko05146//Amoebiasis	XM_027356729.1 PREDICTED: Penaeus vannamei nucleolar protein dao-5-like (LOC113805683), mRNA	LOW QUALITY PROTEIN: nucleolar protein dao-5-like [Penaeus vannamei]	FEZ-like protein	[U] KOG3919 Kinesin-associated fasciculation and elongation protein involved in axonal transport	Fasciculation and elongation protein zeta-2 OS=Homo sapiens OX=9606 GN=FEZ2 PE=1 SV=2
CL364.Contig3_All	0	1.22	6.930737338	5.14E-22	1.27E-23		K17551//neurabin;K17551//neurabin;K17551//neurabin;K17551//neurabin	XM_027359677.1 PREDICTED: Penaeus vannamei uncharacterized LOC113808305 (LOC113808305), mRNA	uncharacterized protein LOC113808305 [Penaeus vannamei]	PDZ domain	[T] KOG1945 Protein phosphatase 1 binding protein spinophilin/neurabin II	Neurabin-1 OS=Homo sapiens OX=9606 GN=PPP1R9A PE=1 SV=2	GO:0016021//integral component of membrane
CL2216.Contig1_All	0	1.2	6.906890596	2.95E-09	1.69E-10			XM_027362319.1 PREDICTED: Penaeus vannamei uncharacterized LOC113810684 (LOC113810684), transcript variant X1, mRNA	uncharacterized protein LOC113810684 isoform X1 [Penaeus vannamei]
Unigene8895_All	0	1.19	6.894817763	2.21E-08	1.40E-09		K17569//G patch domain-containing protein 2;K17569//G patch domain-containing protein 2;K17569//G patch domain-containing protein 2;K17569//G patch domain-containing protein 2;K17569//G patch domain-containing protein 2	XM_027373270.1 PREDICTED: Penaeus vannamei G patch domain-containing protein 2-like (LOC113820886), mRNA	G patch domain-containing protein 2-like [Penaeus vannamei]				GO:0003676//nucleic acid binding
CL67.Contig4_All	0	1.18	6.882643049	2.01E-10	1.02E-11		K22653//neuroplastin;K22653//neuroplastin;K22653//neuroplastin	XM_027351839.1 PREDICTED: Penaeus vannamei hemicentin-2-like (LOC113801036), mRNA	hemicentin-2-like [Penaeus vannamei]	Immunoglobulin domain	[T] KOG3510 FOG: Immunoglobulin C-2 Type/fibronectin type III domains	Basigin OS=Homo sapiens OX=9606 GN=BSG PE=1 SV=2	GO:0016021//integral component of membrane;GO:0005886//plasma membrane;GO:0007155//cell adhesion;GO:0007411//axon guidance;GO:0007411//axon guidance;GO:0007155//cell adhesion;GO:0007411//axon guidance;GO:0007411//axon guidance;GO:0007411//axon guidance
CL1345.Contig2_All	0	1.17	6.87036472	0.000118658	1.30E-05			XM_027374162.1 PREDICTED: Penaeus vannamei uncharacterized LOC113821647 (LOC113821647), mRNA	hypothetical protein C7M84_001781 [Penaeus vannamei]	Domain of unknown function (DUF4728)			GO:0016021//integral component of membrane
CL799.Contig1_All	0	1.13	6.820178962	6.18E-05	6.42E-06		K16812//targeting protein for Xklp2;K16812//targeting protein for Xklp2;K16812//targeting protein for Xklp2;K16812//targeting protein for Xklp2;K16812//targeting protein for Xklp2	XM_027378441.1 PREDICTED: Penaeus vannamei targeting protein for Xklp2-like (LOC113825603), transcript variant X2, mRNA	targeting protein for Xklp2-like isoform X2 [Penaeus vannamei]	Cell cycle regulated microtubule associated protein		Targeting protein for Xklp2 homolog OS=Patiria pectinifera OX=7594 GN=TPX2 PE=2 SV=1	GO:0005819//spindle;GO:0060236//regulation of mitotic spindle organization;GO:0005874//microtubule;GO:0060236//regulation of mitotic spindle organization;GO:0005819//spindle;GO:0032147//activation of protein kinase activity;GO:0032147//activation of protein kinase activity;GO:0005874//microtubule;GO:0032147//activation of protein kinase activity;GO:0032147//activation of protein kinase activity;G…
CL3429.Contig2_All	0	1.13	6.820178962	0.000225292	2.62E-05		K09640//transmembrane protease serine 9 [EC:3.4.21.-];K01362//ovochymase [EC:3.4.21.-];K09640//transmembrane protease serine 9 [EC:3.4.21.-];K09640//transmembrane protease serine 9 [EC:3.4.21.-];K09628//serine protease 27 [EC:3.4.21.-]	XM_027369721.1 PREDICTED: Penaeus vannamei chymotrypsin A-like (LOC113817651), transcript variant X3, mRNA	chymotrypsin A-like isoform X2 [Penaeus vannamei] >XP_027225523.1 chymotrypsin A-like isoform X2 [Penaeus vannamei]	Trypsin	[E] KOG3627 Trypsin	Venom serine protease Bi-VSP OS=Bombus ignitus OX=130704 PE=1 SV=1	GO:0004252//serine-type endopeptidase activity
CL1949.Contig1_All	0	1.12	6.807354922	3.42E-12	1.50E-13	bHLH	K21841//TBC1 domain family member 24;K10532//heparan-alpha-glucosaminide N-acetyltransferase [EC:2.3.1.78]+ko04142//Lysosome+ko00531//Glycosaminoglycan degradation+ko01100//Metabolic pathways;K03650//tRNA modification GTPase [EC:3.6.-.-];K01540//sodium/potassium-transporting ATPase subunit beta+ko04024//cAMP signaling pathway+ko04022//cGMP-PKG signaling pathway+ko04919//Thyroid hormone signaling …	XM_027365289.1 PREDICTED: Penaeus vannamei nuclear receptor coactivator 7-like (LOC113813310), mRNA	TLD domain-containing protein 2 [Armadillidium nasatum]	TLD	[L] KOG2372 Oxidation resistance protein	Oxidation resistance protein 1 OS=Xenopus tropicalis OX=8364 GN=oxr1 PE=2 SV=2
CL1949.Contig3_All	0	1.12	6.807354922	1.88E-15	6.60E-17	bHLH	K21841//TBC1 domain family member 24;K10532//heparan-alpha-glucosaminide N-acetyltransferase [EC:2.3.1.78]+ko04142//Lysosome+ko00531//Glycosaminoglycan degradation+ko01100//Metabolic pathways;K03650//tRNA modification GTPase [EC:3.6.-.-];K01540//sodium/potassium-transporting ATPase subunit beta+ko04024//cAMP signaling pathway+ko04022//cGMP-PKG signaling pathway+ko04919//Thyroid hormone signaling …	XM_027365289.1 PREDICTED: Penaeus vannamei nuclear receptor coactivator 7-like (LOC113813310), mRNA	TLD domain-containing protein 2 [Armadillidium nasatum]	TLD	[L] KOG2372 Oxidation resistance protein	Oxidation resistance protein 1 OS=Xenopus tropicalis OX=8364 GN=oxr1 PE=2 SV=2
CL286.Contig4_All	0	1.11	6.794415866	3.41E-12	1.50E-13		K18161//NADH dehydrogenase [ubiquinone] 1 alpha subcomplex assembly factor 4+ko04714//Thermogenesis;K18161//NADH dehydrogenase [ubiquinone] 1 alpha subcomplex assembly factor 4+ko04714//Thermogenesis;K18161//NADH dehydrogenase [ubiquinone] 1 alpha subcomplex assembly factor 4+ko04714//Thermogenesis;K18161//NADH dehydrogenase [ubiquinone] 1 alpha subcomplex assembly factor 4+ko04714//Thermogenesis…	XM_027353416.1 PREDICTED: Penaeus vannamei NADH dehydrogenase [ubiquinone] 1 alpha subcomplex assembly factor 4-like (LOC113802798), transcript variant X2, mRNA	NADH dehydrogenase [ubiquinone] 1 alpha subcomplex assembly factor 4-like [Penaeus vannamei] >XP_027209217.1 NADH dehydrogenase [ubiquinone] 1 alpha subcomplex assembly factor 4-like [Penaeus vannamei] >ROT81339.1 putative protein NDUFAF4-like [Penaeus vannamei]	Uncharacterised protein family (UPF0240)	[S] KOG4481 Uncharacterized conserved protein	Protein NDUFAF4 homolog OS=Drosophila melanogaster OX=7227 GN=CG11722 PE=2 SV=1	GO:0032981//mitochondrial respiratory chain complex I assembly
CL937.Contig5_All	0	1.06	6.727920455	4.77E-16	1.62E-17		K17338//receptor expression-enhancing protein 1/2/3/4;K17338//receptor expression-enhancing protein 1/2/3/4;K17338//receptor expression-enhancing protein 1/2/3/4;K17338//receptor expression-enhancing protein 1/2/3/4;K17338//receptor expression-enhancing protein 1/2/3/4	XM_027380960.1 PREDICTED: Penaeus vannamei uncharacterized LOC113828009 (LOC113828009), transcript variant X2, mRNA	TB2/DP1/HVA22-related protein [Trinorchestia longiramus]	TB2/DP1, HVA22 family	[V] KOG1726 HVA22/DP1 gene product-related proteins	Receptor expression-enhancing protein 1 OS=Mus musculus OX=10090 GN=Reep1 PE=1 SV=1
CL3875.Contig1_All	0	1.06	6.727920455	6.18E-05	6.42E-06		K13172//serine/arginine repetitive matrix protein 2		proteophosphoglycan 5 [Leishmania major strain Friedlin] >CBZ12682.1 proteophosphoglycan 5 [Leishmania major strain Friedlin]		[Y] KOG2992 Nucleolar GTPase/ATPase p130	Putative protein TPRXL OS=Homo sapiens OX=9606 GN=TPRXL PE=5 SV=2
Unigene3491_All	0	1.03	6.686500527	3.94E-10	2.06E-11		K13172//serine/arginine repetitive matrix protein 2;K13172//serine/arginine repetitive matrix protein 2;K13172//serine/arginine repetitive matrix protein 2;K13172//serine/arginine repetitive matrix protein 2;K13172//serine/arginine repetitive matrix protein 2	XM_027370746.1 PREDICTED: Penaeus vannamei mucin-5AC-like (LOC113818555), mRNA	hypothetical protein C7M84_015317 [Penaeus vannamei]		[A] KOG1869 Splicing coactivator SRm160/300, subunit SRm300	Serine/arginine repetitive matrix protein 2 OS=Homo sapiens OX=9606 GN=SRRM2 PE=1 SV=2
CL347.Contig2_All	0	1.02	6.672425342	1.14E-13	4.48E-15	zf-C2H2	K13094//RNA-binding protein 5/10;K13094//RNA-binding protein 5/10;K13094//RNA-binding protein 5/10;K13094//RNA-binding protein 5/10;K13094//RNA-binding protein 5/10	XM_027362825.1 PREDICTED: Penaeus vannamei RNA-binding protein 5-like (LOC113811154), mRNA	RNA-binding protein 5-like [Penaeus vannamei]	OCRE domain	[K] KOG1874 KEKE-like motif-containing transcription regulator (Rlr1)/suppressor of sin4	RNA-binding protein 5 OS=Mus musculus OX=10090 GN=Rbm5 PE=1 SV=1	GO:0046872//metal ion binding;GO:0003676//nucleic acid binding
CL173.Contig1_All	0	1.02	6.672425342	2.90E-14	1.10E-15		K02602//cytoplasmic polyadenylation element-binding protein+ko04320//Dorso-ventral axis formation+ko04914//Progesterone-mediated oocyte maturation+ko04114//Oocyte meiosis;K02602//cytoplasmic polyadenylation element-binding protein+ko04320//Dorso-ventral axis formation+ko04914//Progesterone-mediated oocyte maturation+ko04114//Oocyte meiosis;K02602//cytoplasmic polyadenylation element-binding prote…	XM_027383712.1 PREDICTED: Penaeus vannamei protein numb-like (LOC113830504), transcript variant X1, mRNA	protein numb-like isoform X2 [Penaeus vannamei]	RNA recognition motif	[T] KOG3537 Adaptor protein NUMB	Translational regulator orb2 OS=Drosophila melanogaster OX=7227 GN=orb2 PE=1 SV=1
CL276.Contig6_All	0	1.02	6.672425342	6.51E-23	1.55E-24		K12842//U2-associated protein SR140+ko03040//Spliceosome;K12842//U2-associated protein SR140+ko03040//Spliceosome;K12842//U2-associated protein SR140+ko03040//Spliceosome;K12842//U2-associated protein SR140+ko03040//Spliceosome;K12842//U2-associated protein SR140+ko03040//Spliceosome	XM_027352156.1 PREDICTED: Penaeus vannamei U2 snRNP-associated SURP motif-containing protein-like (LOC113801328), mRNA	U2 snRNP-associated SURP motif-containing protein-like [Penaeus vannamei]	RNA recognition motif. (a.k.a. RRM, RBD, or RNP domain)	[R] KOG0151 Predicted splicing regulator, contains RRM, SWAP and RPR domains	U2 snRNP-associated SURP motif-containing protein OS=Mus musculus OX=10090 GN=U2surp PE=1 SV=3	GO:0006396//RNA processing;GO:0006396//RNA processing;GO:0003723//RNA binding
Unigene3672_All	0	0.99	6.62935662	4.32E-08	2.82E-09		K10317//F-box protein 42;K10317//F-box protein 42	XM_027362987.1 PREDICTED: Penaeus vannamei kelch domain-containing protein 2-like (LOC113811274), mRNA	kelch domain-containing protein 2-like [Penaeus vannamei]	Galactose oxidase, central domain	[R] KOG0379 Kelch repeat-containing proteins	Kelch domain-containing protein 2 OS=Mus musculus OX=10090 GN=Klhdc2 PE=2 SV=3
CL1993.Contig4_All	0	0.99	6.62935662	1.13E-08	6.91E-10			XM_027358676.1 PREDICTED: Penaeus vannamei uncharacterized LOC113807424 (LOC113807424), mRNA	uncharacterized protein LOC113807424 [Penaeus vannamei]	AhpC/TSA antioxidant enzyme			GO:0007229//integrin-mediated signaling pathway;GO:0007229//integrin-mediated signaling pathway;GO:0007229//integrin-mediated signaling pathway;GO:0007229//integrin-mediated signaling pathway;GO:0055114//oxidation-reduction process;GO:0007229//integrin-mediated signaling pathway
CL331.Contig1_All	0	0.96	6.584962501	2.25E-13	9.04E-15		K12836//splicing factor U2AF 35 kDa subunit+ko03040//Spliceosome+ko05131//Shigellosis;K12836//splicing factor U2AF 35 kDa subunit+ko03040//Spliceosome+ko05131//Shigellosis;K12836//splicing factor U2AF 35 kDa subunit+ko03040//Spliceosome+ko05131//Shigellosis;K12836//splicing factor U2AF 35 kDa subunit+ko03040//Spliceosome+ko05131//Shigellosis;K12836//splicing factor U2AF 35 kDa subunit+ko03040//Sp…	XM_027369172.1 PREDICTED: Penaeus vannamei splicing factor U2AF 26 kDa subunit-like (LOC113817162), mRNA	splicing factor U2AF 26 kDa subunit-like [Penaeus vannamei]	RNA recognition motif. (a.k.a. RRM, RBD, or RNP domain)	[A] KOG2202 U2 snRNP splicing factor, small subunit, and related proteins	Splicing factor U2af 38 kDa subunit OS=Drosophila melanogaster OX=7227 GN=U2af38 PE=1 SV=2	GO:0089701//U2AF complex;GO:0000398//mRNA splicing, via spliceosome;GO:0046872//metal ion binding;GO:0000398//mRNA splicing, via spliceosome;GO:0089701//U2AF complex;GO:0089701//U2AF complex;GO:0003723//RNA binding
Unigene17250_All	0	0.95	6.569855608	1.02E-10	5.05E-12		K04441//p38 MAP kinase [EC:2.7.11.24]+ko05014//Amyotrophic lateral sclerosis (ALS)+ko05132//Salmonella infection+ko05133//Pertussis+ko05131//Shigellosis+ko04933//AGE-RAGE signaling pathway in diabetic complications+ko04212//Longevity regulating pathway - worm+ko04218//Cellular senescence+ko04071//Sphingolipid signaling pathway+ko01522//Endocrine resistance+ko04917//Prolactin signaling pathway+ko0…	XM_027367739.1 PREDICTED: Penaeus vannamei mitogen-activated protein kinase p38b-like (LOC113815719), transcript variant X1, mRNA	P38 mitogen-activated protein kinase [Penaeus vannamei]	Protein kinase domain	[T] KOG0660 Mitogen-activated protein kinase	Mitogen-activated protein kinase 14 OS=Canis lupus familiaris OX=9615 GN=MAPK14 PE=2 SV=3	GO:0004707//MAP kinase activity;GO:0005524//ATP binding
CL413.Contig2_All	0	0.94	6.554588852	0.000812929	0.000106675		K14845//RAT1-interacting protein;K14845//RAT1-interacting protein;K14845//RAT1-interacting protein;K14845//RAT1-interacting protein	XM_027383360.1 PREDICTED: Penaeus vannamei decapping and exoribonuclease protein-like (LOC113830154), mRNA	decapping and exoribonuclease protein-like [Penaeus vannamei]	RAI1 like PD-(D/E)XK nuclease	[L] KOG1982 Nuclear 5'-3' exoribonuclease-interacting protein, Rai1p	Decapping and exoribonuclease protein OS=Mus musculus OX=10090 GN=Dxo PE=1 SV=2
CL1180.Contig6_All	0	0.92	6.523561956	1.31E-25	2.77E-27		K11348//bromodomain and PHD finger-containing protein 1;K11348//bromodomain and PHD finger-containing protein 1;K11348//bromodomain and PHD finger-containing protein 1;K11348//bromodomain and PHD finger-containing protein 1	XM_027362382.1 PREDICTED: Penaeus vannamei peregrin-like (LOC113810736), transcript variant X10, mRNA	peregrin-like isoform X9 [Penaeus vannamei]	PHD-zinc-finger like domain	[R] KOG0955 PHD finger protein BR140/LIN-49	Bromodomain-containing protein 1 OS=Mus musculus OX=10090 GN=Brd1 PE=1 SV=1
CL354.Contig6_All	0	0.92	6.523561956	1.27E-19	3.52E-21	ARID	K07874//Ras-related protein Rab-1A+ko05134//Legionellosis;K07874//Ras-related protein Rab-1A+ko05134//Legionellosis;K07874//Ras-related protein Rab-1A+ko05134//Legionellosis;K07874//Ras-related protein Rab-1A+ko05134//Legionellosis;K07874//Ras-related protein Rab-1A+ko05134//Legionellosis	XM_027380256.1 PREDICTED: Penaeus vannamei protein split ends-like (LOC113827377), mRNA	protein split ends-like [Penaeus vannamei]	RBB1NT (NUC162) domain	[K] KOG2744 DNA-binding proteins Bright/BRCAA1/RBP1 and related proteins containing BRIGHT domain	AT-rich interactive domain-containing protein 4B OS=Mus musculus OX=10090 GN=Arid4b PE=1 SV=1	GO:0003677//DNA binding;GO:0005634//nucleus;GO:0005634//nucleus
Unigene25824_All	0.05	4.51	6.495055528	8.78E-55	7.57E-57	zf-C2H2	K09452//homeobox protein aristaless-related;K09332//retina and anterior neural fold homeobox protein;K09452//homeobox protein aristaless-related;K09452//homeobox protein aristaless-related	XM_027371408.1 PREDICTED: Penaeus vannamei retinal homeobox protein Rx-like (LOC113819166), partial mRNA	putative retinal homeobox protein Rx2-like [Penaeus vannamei]	Homeodomain	[R] KOG0490 Transcription factor, contains HOX domain	Short stature homeobox protein 2 OS=Homo sapiens OX=9606 GN=SHOX2 PE=2 SV=4	GO:0006355//regulation of transcription, DNA-templated;GO:0043565//sequence-specific DNA binding;GO:0005634//nucleus;GO:0006355//regulation of transcription, DNA-templated;GO:0006355//regulation of transcription, DNA-templated;GO:0006355//regulation of transcription, DNA-templated;GO:0005634//nucleus
CL2909.Contig3_All	0	0.9	6.491853096	4.50E-06	3.86E-07		K14376//poly(A) polymerase [EC:2.7.7.19]+ko03015//mRNA surveillance pathway;K14376//poly(A) polymerase [EC:2.7.7.19]+ko03015//mRNA surveillance pathway;K14376//poly(A) polymerase [EC:2.7.7.19]+ko03015//mRNA surveillance pathway;K14376//poly(A) polymerase [EC:2.7.7.19]+ko03015//mRNA surveillance pathway;K14376//poly(A) polymerase [EC:2.7.7.19]+ko03015//mRNA surveillance pathway	XM_027377163.1 PREDICTED: Penaeus vannamei poly(A) polymerase type 3-like (LOC113824423), transcript variant X3, mRNA	poly(A) polymerase type 3-like isoform X1 [Penaeus vannamei]	Poly(A) polymerase central domain	[A] KOG2245 Poly(A) polymerase and related nucleotidyltransferases	Poly(A) polymerase gamma OS=Homo sapiens OX=9606 GN=PAPOLG PE=1 SV=2	GO:0031123//RNA 3'-end processing;GO:0043631//RNA polyadenylation;GO:0005634//nucleus;GO:0003723//RNA binding;GO:0046872//metal ion binding;GO:0005524//ATP binding;GO:0043631//RNA polyadenylation;GO:0005634//nucleus;GO:0006397//mRNA processing;GO:0031123//RNA 3'-end processing;GO:0006397//mRNA processing;GO:0004652//polynucleotide adenylyltransferase activity
Unigene26033_All	0	0.9	6.491853096	2.33E-06	1.91E-07			XM_027352565.1 PREDICTED: Penaeus vannamei uncharacterized LOC113802101 (LOC113802101), mRNA	putative Fanconi anemia group G protein [Penaeus vannamei]				GO:0036297//interstrand cross-link repair;GO:0043240//Fanconi anaemia nuclear complex;GO:0036297//interstrand cross-link repair;GO:0043240//Fanconi anaemia nuclear complex;GO:0043240//Fanconi anaemia nuclear complex;GO:0036297//interstrand cross-link repair
Unigene26042_All	0.02	1.79	6.483815777	0.000225255	2.62E-05			XM_027367190.1 PREDICTED: Penaeus vannamei sphingomyelin phosphodiesterase 5-like (LOC113815109), mRNA
CL2285.Contig1_All	0	0.89	6.475733431	1.47E-14	5.44E-16		K13866//solute carrier family 7 (cationic amino acid transporter), member 4;K13866//solute carrier family 7 (cationic amino acid transporter), member 4;K13866//solute carrier family 7 (cationic amino acid transporter), member 4;K13866//solute carrier family 7 (cationic amino acid transporter), member 4;K13866//solute carrier family 7 (cationic amino acid transporter), member 4	XM_027372783.1 PREDICTED: Penaeus vannamei cationic amino acid transporter 4-like (LOC113820467), mRNA	cationic amino acid transporter 4-like [Penaeus vannamei]	C-terminus of AA_permease	[E] KOG1286 Amino acid transporters	Cationic amino acid transporter 4 OS=Mus musculus OX=10090 GN=Slc7a4 PE=1 SV=1	GO:0016021//integral component of membrane;GO:1902475//L-alpha-amino acid transmembrane transport;GO:0022857//transmembrane transporter activity;GO:1902475//L-alpha-amino acid transmembrane transport
CL1332.Contig2_All	0	0.86	6.426264755	6.19E-07	4.69E-08		K05849//solute carrier family 8 (sodium/calcium exchanger)+ko04022//cGMP-PKG signaling pathway+ko04020//Calcium signaling pathway+ko04974//Protein digestion and absorption+ko04371//Apelin signaling pathway+ko04740//Olfactory transduction	XM_027356989.1 PREDICTED: Penaeus vannamei uncharacterized LOC113805919 (LOC113805919), transcript variant X3, mRNA	PREDICTED: uncharacterized protein LOC106814924 [Priapulus caudatus]
CL1330.Contig4_All	0	0.85	6.409390936	5.76E-09	3.42E-10		K14944//RNA-binding protein Nova;K14944//RNA-binding protein Nova;K14944//RNA-binding protein Nova;K14944//RNA-binding protein Nova;K14944//RNA-binding protein Nova	XR_003475844.1 PREDICTED: Penaeus vannamei RNA-binding protein Nova-1 pseudogene (LOC113806934), transcript variant X3, misc_RNA	RNA-binding protein Nova-1 [Armadillidium nasatum]	KH domain	[AR] KOG2191 RNA-binding protein NOVA1/PASILLA and related KH domain proteins	RNA-binding protein Nova-1 OS=Macaca fascicularis OX=9541 GN=NOVA1 PE=2 SV=1	GO:0003723//RNA binding
Unigene17387_All	0	0.84	6.392317423	5.76E-09	3.42E-10		K13219//splicing factor, proline- and glutamine-rich;K13219//splicing factor, proline- and glutamine-rich;K13219//splicing factor, proline- and glutamine-rich;K13219//splicing factor, proline- and glutamine-rich;K13219//splicing factor, proline- and glutamine-rich	XM_027378892.1 PREDICTED: Penaeus vannamei hrp65 protein-like (LOC113826030), mRNA	hrp65 protein-like [Penaeus vannamei]	RNA recognition motif. (a.k.a. RRM, RBD, or RNP domain)	[A] KOG0115 RNA-binding protein p54nrb (RRM superfamily)	Protein no-on-transient A OS=Drosophila virilis OX=7244 GN=nonA PE=2 SV=1	GO:0003723//RNA binding
CL20.Contig24_All	0	0.83	6.375039431	0.000429687	5.28E-05			XR_003476126.1 PREDICTED: Penaeus vannamei splicing factor, proline- and glutamine-rich-like (LOC113810363), transcript variant X2, misc_RNA	epsin-2-like [Penaeus vannamei]
CL503.Contig14_All	0	0.81	6.339850003	5.77E-09	3.42E-10	bHLH	K22526//myocardin;K22282//fatty acid hydroxylase domain-containing protein 2;K21958//extracellular serine/threonine protein kinase FAM20C [EC:2.7.11.1];K08741//DNA mismatch repair protein MSH5;K16340//PH domain and leucine-rich repeat-containing protein phosphatase [EC:3.1.3.16]+ko04151//PI3K-Akt signaling pathway	XM_027360688.1 PREDICTED: Penaeus vannamei uncharacterized LOC113809172 (LOC113809172), transcript variant X8, mRNA	hypothetical protein F7725_021765 [Dissostichus mawsoni]				GO:0016787//hydrolase activity;GO:0016021//integral component of membrane;GO:0005524//ATP binding
Unigene17384_All	0	0.81	6.339850003	2.33E-06	1.91E-07		K04398//caspase 8 [EC:3.4.22.61]+ko05416//Viral myocarditis+ko05134//Legionellosis+ko04214//Apoptosis - fly+ko04215//Apoptosis - multiple species+ko04217//Necroptosis+ko04210//Apoptosis+ko01524//Platinum drug resistance+ko05170//Human immunodeficiency virus 1 infection+ko04657//IL-17 signaling pathway+ko04625//C-type lectin receptor signaling pathway+ko04668//TNF signaling pathway+ko05145//Toxopl…	XM_027375132.1 PREDICTED: Penaeus vannamei uncharacterized LOC113822604 (LOC113822604), mRNA	uncharacterized protein LOC113822604 [Penaeus vannamei]	Caspase domain	[D] KOG3573 Caspase, apoptotic cysteine protease	Caspase-8 OS=Drosophila melanogaster OX=7227 GN=Dredd PE=1 SV=3	GO:0004197//cysteine-type endopeptidase activity
CL1136.Contig1_All	0	0.81	6.339850003	1.51E-09	8.39E-11		K13708//dedicator of cytokinesis protein 1+ko05131//Shigellosis+ko04810//Regulation of actin cytoskeleton+ko04510//Focal adhesion+ko05100//Bacterial invasion of epithelial cells;K13708//dedicator of cytokinesis protein 1+ko05131//Shigellosis+ko04810//Regulation of actin cytoskeleton+ko04510//Focal adhesion+ko05100//Bacterial invasion of epithelial cells;K13708//dedicator of cytokinesis protein 1+…	XM_027365513.1 PREDICTED: Penaeus vannamei dedicator of cytokinesis protein 2-like (LOC113813518), mRNA	LOW QUALITY PROTEIN: dedicator of cytokinesis protein 2-like [Penaeus vannamei]	Dock homology region 2	[T] KOG1998 Signaling protein DOCK180	Dedicator of cytokinesis protein 5 OS=Homo sapiens OX=9606 GN=DOCK5 PE=1 SV=3	GO:0007264//small GTPase mediated signal transduction;GO:0007264//small GTPase mediated signal transduction;GO:0007264//small GTPase mediated signal transduction;GO:0005085//guanyl-nucleotide exchange factor activity;GO:0007264//small GTPase mediated signal transduction;GO:0007264//small GTPase mediated signal transduction;GO:0005085//guanyl-nucleotide exchange factor activity
CL830.Contig2_All	0	0.81	6.339850003	1.68E-05	1.57E-06		K10589//ubiquitin-protein ligase E3 C [EC:2.3.2.26]+ko04120//Ubiquitin mediated proteolysis;K10589//ubiquitin-protein ligase E3 C [EC:2.3.2.26]+ko04120//Ubiquitin mediated proteolysis;K10589//ubiquitin-protein ligase E3 C [EC:2.3.2.26]+ko04120//Ubiquitin mediated proteolysis;K10589//ubiquitin-protein ligase E3 C [EC:2.3.2.26]+ko04120//Ubiquitin mediated proteolysis;K10589//ubiquitin-protein ligas…	XM_027365285.1 PREDICTED: Penaeus vannamei ubiquitin-protein ligase E3C-like (LOC113813306), mRNA	ubiquitin-protein ligase E3C-like [Penaeus vannamei] >ROT70559.1 putative ubiquitin-protein ligase E3C [Penaeus vannamei]	YfhG lipoprotein	[O] KOG0942 E3 ubiquitin protein ligase	Ubiquitin-protein ligase E3B OS=Mus musculus OX=10090 GN=Ube3b PE=1 SV=3	GO:0016874//ligase activity;GO:0004842//ubiquitin-protein transferase activity
CL277.Contig3_All	0	0.79	6.303780748	6.18E-05	6.42E-06			XR_003477275.1 PREDICTED: Penaeus vannamei uncharacterized LOC113822179 (LOC113822179), ncRNA	hypothetical protein C7M84_001087 [Penaeus vannamei]
Unigene17255_All	0	0.78	6.285402219	0.000429888	5.28E-05		K06070//protein kinase D [EC:2.7.11.13]+ko04015//Rap1 signaling pathway+ko04925//Aldosterone synthesis and secretion;K06070//protein kinase D [EC:2.7.11.13]+ko04015//Rap1 signaling pathway+ko04925//Aldosterone synthesis and secretion;K06070//protein kinase D [EC:2.7.11.13]+ko04015//Rap1 signaling pathway+ko04925//Aldosterone synthesis and secretion	XM_027358213.1 PREDICTED: Penaeus vannamei serine/threonine-protein kinase D1-like (LOC113807049), mRNA	putative serine/threonine-protein kinase D3 isoform X2, partial [Penaeus vannamei]	Protein kinase domain	[T] KOG4236 Serine/threonine protein kinase PKC mu/PKD and related proteins	Serine/threonine-protein kinase D1 OS=Rattus norvegicus OX=10116 GN=Prkd1 PE=1 SV=2	GO:0035556//intracellular signal transduction;GO:0046872//metal ion binding;GO:0004697//protein kinase C activity;GO:0005524//ATP binding;GO:0004698//calcium-dependent protein kinase C activity;GO:0035556//intracellular signal transduction;GO:0035556//intracellular signal transduction;GO:0035556//intracellular signal transduction;GO:0035556//intracellular signal transduction
CL585.Contig4_All	0	0.76	6.247927513	1.00E-18	2.90E-20		K18460//exportin-7;K18460//exportin-7;K18460//exportin-7;K18460//exportin-7;K18460//exportin-7	XM_027382949.1 PREDICTED: Penaeus vannamei exportin-7-like (LOC113829773), transcript variant X4, mRNA	exportin-7-like isoform X5 [Penaeus vannamei] >ROT83774.1 putative exportin-7 isoform X2 [Penaeus vannamei]	Importin-beta N-terminal domain	[YU] KOG1410 Nuclear transport receptor RanBP16 (importin beta superfamily)	Exportin-7 OS=Gallus gallus OX=9031 GN=XPO7 PE=2 SV=1	GO:0005634//nucleus;GO:0008536//Ran GTPase binding;GO:0006886//intracellular protein transport;GO:0051169//nuclear transport;GO:0006886//intracellular protein transport;GO:0051169//nuclear transport;GO:0005634//nucleus
CL37.Contig10_All	0	0.76	6.247927513	3.20E-07	2.32E-08		K14937//methyl farnesoate epoxidase / farnesoate epoxidase [EC:1.14.14.127 1.14.14.128]+ko00981//Insect hormone biosynthesis;K14937//methyl farnesoate epoxidase / farnesoate epoxidase [EC:1.14.14.127 1.14.14.128]+ko00981//Insect hormone biosynthesis;K14937//methyl farnesoate epoxidase / farnesoate epoxidase [EC:1.14.14.127 1.14.14.128]+ko00981//Insect hormone biosynthesis;K07418//cytochrome P450 …	XM_027375528.1 PREDICTED: Penaeus vannamei methyl farnesoate epoxidase-like (LOC113822977), mRNA	cytochrome P450 monooxygenase [Penaeus vannamei]	Cytochrome P450	[Q] KOG0156 Cytochrome P450 CYP2 subfamily	Cytochrome P450 2B4 OS=Oryctolagus cuniculus OX=9986 GN=CYP2B4 PE=1 SV=1	GO:0016021//integral component of membrane;GO:0016705//oxidoreductase activity, acting on paired donors, with incorporation or reduction of molecular oxygen;GO:0005506//iron ion binding;GO:0020037//heme binding;GO:0004497//monooxygenase activity
CL1333.Contig7_All	0.05	3.78	6.240314329	9.18E-93	4.03E-95	zf-C2H2	K05096//FMS-like tyrosine kinase 1 [EC:2.7.10.1]+ko04510//Focal adhesion+ko05323//Rheumatoid arthritis+ko05202//Transcriptional misregulation in cancer+ko04151//PI3K-Akt signaling pathway+ko04010//MAPK signaling pathway+ko04014//Ras signaling pathway+ko04015//Rap1 signaling pathway+ko04066//HIF-1 signaling pathway;K05096//FMS-like tyrosine kinase 1 [EC:2.7.10.1]+ko04510//Focal adhesion+ko05323//R…	XM_027357268.1 PREDICTED: Penaeus vannamei platelet-derived growth factor receptor beta-like (LOC113806152), transcript variant X1, mRNA	putative vascular endothelial growth factor receptor 1 isoform X3 [Penaeus vannamei]	Protein tyrosine and serine/threonine kinase	[T] KOG0200 Fibroblast/platelet-derived growth factor receptor and related receptor tyrosine kinases	Mast/stem cell growth factor receptor Kit OS=Takifugu rubripes OX=31033 GN=kit PE=3 SV=1	GO:0016021//integral component of membrane;GO:0005524//ATP binding;GO:0004714//transmembrane receptor protein tyrosine kinase activity;GO:0004714//transmembrane receptor protein tyrosine kinase activity
CL961.Contig12_All	0	0.75	6.22881869	8.76E-13	3.69E-14			XR_003475538.1 PREDICTED: Penaeus vannamei uncharacterized LOC113803657 (LOC113803657), transcript variant X2, ncRNA
CL3430.Contig1_All	0	0.74	6.209453366	4.50E-06	3.86E-07			XM_027377571.1 PREDICTED: Penaeus vannamei uncharacterized LOC113824784 (LOC113824784), mRNA	uncharacterized protein LOC113824784 [Penaeus vannamei]	P53 DNA-binding domain
CL241.Contig6_All	0	0.73	6.189824559	1.20E-06	9.46E-08		K13171//serine/arginine repetitive matrix protein 1+ko03013//RNA transport+ko03015//mRNA surveillance pathway;K13169//splicing factor, arginine/serine-rich 17;K13165//splicing factor, arginine/serine-rich 12;K13171//serine/arginine repetitive matrix protein 1+ko03013//RNA transport+ko03015//mRNA surveillance pathway	XM_027360714.1 PREDICTED: Penaeus vannamei uncharacterized LOC113809189 (LOC113809189), transcript variant X1, mRNA	uncharacterized protein LOC113809189 isoform X1 [Penaeus vannamei]	Golgi-body localisation protein domain	[A] KOG4676 Splicing factor, arginine/serine-rich	Uncharacterized protein DDB_G0287625 OS=Dictyostelium discoideum OX=44689 GN=DDB_G0287625 PE=4 SV=1
CL346.Contig2_All	0	0.73	6.189824559	5.77E-09	3.42E-10	zf-C2H2	K04381//stathmin+ko05206//MicroRNAs in cancer+ko04010//MAPK signaling pathway;K10955//mucin-2+ko05226//Gastric cancer+ko05146//Amoebiasis;K10955//mucin-2+ko05226//Gastric cancer+ko05146//Amoebiasis;K10955//mucin-2+ko05226//Gastric cancer+ko05146//Amoebiasis;K13909//mucin-7+ko04970//Salivary secretion	XM_027351349.1 PREDICTED: Penaeus vannamei axoneme-associated protein mst101(2)-like (LOC113800559), mRNA	axoneme-associated protein mst101(2)-like [Penaeus vannamei]	Stathmin family	[R] LSE0026 A Ripening-related protein	Proline-rich protein 2 OS=Mus musculus OX=10090 GN=Prp2 PE=2 SV=2	GO:0031110//regulation of microtubule polymerization or depolymerization;GO:0031110//regulation of microtubule polymerization or depolymerization;GO:0031110//regulation of microtubule polymerization or depolymerization;GO:0016021//integral component of membrane
CL1327.Contig4_All	0	0.72	6.169925001	0.000429821	5.28E-05			XR_003475686.1 PREDICTED: Penaeus vannamei uncharacterized LOC113805494 (LOC113805494), transcript variant X2, ncRNA	hypothetical protein C7M84_004848 [Penaeus vannamei]				GO:0000049//tRNA binding;GO:0004809//tRNA (guanine-N2-)-methyltransferase activity
CL1230.Contig6_All	0	0.7	6.129283017	0.000225329	2.62E-05		K07374//tubulin alpha+ko04145//Phagosome+ko05130//Pathogenic Escherichia coli infection+ko04210//Apoptosis+ko04540//Gap junction+ko04530//Tight junction;K07374//tubulin alpha+ko04145//Phagosome+ko05130//Pathogenic Escherichia coli infection+ko04210//Apoptosis+ko04540//Gap junction+ko04530//Tight junction;K07374//tubulin alpha+ko04145//Phagosome+ko05130//Pathogenic Escherichia coli infection+ko042…	XM_027380687.1 PREDICTED: Penaeus vannamei tubulin alpha-3 chain (LOC113827788), mRNA	tubulin alpha-1B chain isoform X1 [Cricetulus griseus]	Tubulin/FtsZ family, GTPase domain	[Z] KOG1376 Alpha tubulin	Tubulin alpha-8 chain OS=Mus musculus OX=10090 GN=Tuba8 PE=1 SV=1	GO:0005525//GTP binding;GO:0005874//microtubule;GO:0007017//microtubule-based process;GO:0005874//microtubule;GO:0005200//structural constituent of cytoskeleton;GO:0005737//cytoplasm;GO:0003924//GTPase activity;GO:0005737//cytoplasm
Unigene14840_All	0	0.69	6.108524457	6.18E-05	6.42E-06			XM_027369470.1 PREDICTED: Penaeus vannamei uncharacterized LOC113817412 (LOC113817412), transcript variant X3, mRNA	uncharacterized protein LOC113817412 isoform X2 [Penaeus vannamei]				GO:0016021//integral component of membrane
Unigene25210_All	0.12	7.87	6.035257325	6.04E-17	1.95E-18		K10357//myosin V	XM_027353756.1 PREDICTED: Penaeus vannamei single insulin-like growth factor-binding domain protein-2 (LOC113803051), mRNA	single insulin-like growth factor-binding domain protein-2 [Penaeus vannamei] >ROT78501.1 crustacean hematopoietic factor-like protein [Penaeus vannamei]			Venom protein 302 OS=Lychas mucronatus OX=172552 PE=2 SV=1	GO:0001558//regulation of cell growth;GO:0001558//regulation of cell growth;GO:0001558//regulation of cell growth;GO:0005520//insulin-like growth factor binding;GO:0001558//regulation of cell growth;GO:0005576//extracellular region
Unigene25409_All	0.1	6.36	5.99095486	1.58E-17	4.93E-19			XM_027382986.1 PREDICTED: Penaeus vannamei myosin-9-like (LOC113829812), mRNA	hypothetical protein C7M84_023090 [Penaeus vannamei]	Flagellar Assembly Protein A		Unconventional myosin-XVIIIa OS=Rattus norvegicus OX=10116 GN=Myo18a PE=1 SV=2
CL2.Contig2_All	0	0.63	5.977279923	4.50E-06	3.86E-07			XM_027380644.1 PREDICTED: Penaeus vannamei putative glutathione-specific gamma-glutamylcyclotransferase 2 (LOC113827743), transcript variant X7, mRNA	putative glutathione-specific gamma-glutamylcyclotransferase 2 isoform X2 [Penaeus vannamei]
CL503.Contig7_All	0	0.63	5.977279923	2.33E-06	1.91E-07	bHLH	K22526//myocardin;K22282//fatty acid hydroxylase domain-containing protein 2;K21958//extracellular serine/threonine protein kinase FAM20C [EC:2.7.11.1];K08741//DNA mismatch repair protein MSH5;K16340//PH domain and leucine-rich repeat-containing protein phosphatase [EC:3.1.3.16]+ko04151//PI3K-Akt signaling pathway	XM_027360689.1 PREDICTED: Penaeus vannamei uncharacterized LOC113809172 (LOC113809172), transcript variant X9, mRNA	hypothetical protein F7725_004109 [Dissostichus mawsoni]				GO:0071011//precatalytic spliceosome;GO:0016021//integral component of membrane;GO:0071011//precatalytic spliceosome;GO:0071011//precatalytic spliceosome
Unigene17337_All	0.12	7.51	5.967706597	9.40E-34	1.47E-35			XM_027357358.1 PREDICTED: Penaeus vannamei histidine-rich glycoprotein-like (LOC113806234), mRNA
CL3074.Contig1_All	0	0.61	5.930737338	7.69E-10	4.16E-11		K04678//E3 ubiquitin ligase SMURF1/2 [EC:2.3.2.26]+ko04144//Endocytosis+ko04350//TGF-beta signaling pathway+ko04341//Hedgehog signaling pathway - fly+ko04340//Hedgehog signaling pathway+ko04120//Ubiquitin mediated proteolysis;K04678//E3 ubiquitin ligase SMURF1/2 [EC:2.3.2.26]+ko04144//Endocytosis+ko04350//TGF-beta signaling pathway+ko04341//Hedgehog signaling pathway - fly+ko04340//Hedgehog signa…	XM_027363611.1 PREDICTED: Penaeus vannamei E3 ubiquitin-protein ligase SMURF1-like (LOC113811782), transcript variant X2, mRNA	E3 ubiquitin-protein ligase SMURF2-like isoform X2 [Penaeus vannamei]	HECT-domain (ubiquitin-transferase)	[O] KOG0940 Ubiquitin protein ligase RSP5/NEDD4	E3 ubiquitin-protein ligase SMURF2 OS=Homo sapiens OX=9606 GN=SMURF2 PE=1 SV=1	GO:0061630//ubiquitin protein ligase activity;GO:0006511//ubiquitin-dependent protein catabolic process;GO:0006511//ubiquitin-dependent protein catabolic process
CL1081.Contig9_All	0	0.61	5.930737338	2.21E-08	1.40E-09		K14000//ribosome-binding protein 1+ko04141//Protein processing in endoplasmic reticulum;K14000//ribosome-binding protein 1+ko04141//Protein processing in endoplasmic reticulum;K14000//ribosome-binding protein 1+ko04141//Protein processing in endoplasmic reticulum;K14000//ribosome-binding protein 1+ko04141//Protein processing in endoplasmic reticulum;K17975//kinectin	XM_027379782.1 PREDICTED: Penaeus vannamei intracellular protein transport protein USO1-like (LOC113826878), mRNA	myosin heavy chain, non-muscle-like isoform X2 [Penaeus vannamei]	Ribosome receptor lysine/proline rich region	[Z] LSE0280 A Cytoskeleton-associated protein	Myosin-10 OS=Mus musculus OX=10090 GN=Myh10 PE=1 SV=2	GO:0030176//integral component of endoplasmic reticulum membrane
Unigene25942_All	0	0.59	5.882643049	5.76E-09	3.42E-10		K02870//large subunit ribosomal protein L12e+ko03010//Ribosome;K02870//large subunit ribosomal protein L12e+ko03010//Ribosome;K02870//large subunit ribosomal protein L12e+ko03010//Ribosome;K02870//large subunit ribosomal protein L12e+ko03010//Ribosome;K02870//large subunit ribosomal protein L12e+ko03010//Ribosome	XM_027382845.1 PREDICTED: Penaeus vannamei calcium-responsive transcription factor-like (LOC113829640), mRNA	calcium-responsive transcription factor-like [Penaeus vannamei]	Amyotrophic lateral sclerosis 2 chromosomal region candidate gene 8	[J] KOG0886 40S ribosomal protein S2	60S ribosomal protein L12 OS=Caenorhabditis elegans OX=6239 GN=rpl-12 PE=3 SV=1
CL2374.Contig4_All	0	0.58	5.857980995	4.33E-08	2.82E-09		K22017//mucin-4;K22017//mucin-4;K10955//mucin-2+ko05226//Gastric cancer+ko05146//Amoebiasis;K22017//mucin-4;K22016//mucin-3/17	XM_027355712.1 PREDICTED: Penaeus vannamei aftiphilin-like (LOC113804805), transcript variant X2, mRNA	aftiphilin-like isoform X2 [Penaeus vannamei]	Clathrin-binding box of Aftiphilin, vesicle trafficking	[GO] KOG4157 beta-1,6-N-acetylglucosaminyltransferase, contains WSC domain	Spore coat protein SP96 OS=Dictyostelium discoideum OX=44689 GN=cotA PE=4 SV=2
CL2499.Contig2_All	0	0.57	5.832890014	1.73E-12	7.44E-14		K06104//angiomotin like+ko04530//Tight junction;K06104//angiomotin like+ko04530//Tight junction;K06104//angiomotin like+ko04530//Tight junction;K06104//angiomotin like+ko04530//Tight junction;K06104//angiomotin like+ko04530//Tight junction	XM_027381593.1 PREDICTED: Penaeus vannamei angiomotin-like protein 1 (LOC113828587), mRNA	angiomotin [Physeter catodon]	Angiomotin C terminal		Histone-lysine N-methyltransferase, H3 lysine-79 specific OS=Dictyostelium discoideum OX=44689 GN=dotA PE=2 SV=2	GO:0035329//hippo signaling;GO:0034260//negative regulation of GTPase activity;GO:0043534//blood vessel endothelial cell migration;GO:0030027//lamellipodium;GO:0001726//ruffle;GO:0051056//regulation of small GTPase mediated signal transduction;GO:0051056//regulation of small GTPase mediated signal transduction;GO:0001702//gastrulation with mouth forming second;GO:0035329//hippo signaling;GO:00420…
Unigene21972_All	0.06	3.26	5.763765654	3.56E-13	1.45E-14		K09884//aquaporin rerated protein, invertebrate;K09884//aquaporin rerated protein, invertebrate	JF838196.1 Penaeus monodon aquaporin 1 (AQP1) mRNA, complete cds	aquaporin 1 [Penaeus monodon]	Major intrinsic protein	[G] KOG0223 Aquaporin (major intrinsic protein family)	Aquaporin AQPAe.a OS=Aedes aegypti OX=7159 GN=AAEL003512 PE=2 SV=2	GO:0016021//integral component of membrane;GO:0015267//channel activity
CL107.Contig2_All	0	0.54	5.754887502	1.68E-05	1.57E-06		K12867//pre-mRNA-splicing factor SYF1+ko03040//Spliceosome;K12867//pre-mRNA-splicing factor SYF1+ko03040//Spliceosome;K12867//pre-mRNA-splicing factor SYF1+ko03040//Spliceosome;K12867//pre-mRNA-splicing factor SYF1+ko03040//Spliceosome	XM_027366829.1 PREDICTED: Penaeus vannamei pre-mRNA-splicing factor SYF1-like (LOC113814774), transcript variant X2, mRNA	Pre-mRNA-splicing factor SYF1 [Armadillidium nasatum]	Tetratricopeptide repeat	[A] KOG2047 mRNA splicing factor	Pre-mRNA-splicing factor syf1 homolog OS=Drosophila melanogaster OX=7227 GN=fand PE=1 SV=1	GO:0006396//RNA processing;GO:0006396//RNA processing
CL934.Contig2_All	0	0.54	5.754887502	0.000118762	1.30E-05	TF_bZIP	K04450//cyclic AMP-dependent transcription factor ATF-2+ko04022//cGMP-PKG signaling pathway+ko04211//Longevity regulating pathway+ko04918//Thyroid hormone synthesis+ko04915//Estrogen signaling pathway+ko04911//Insulin secretion+ko04728//Dopaminergic synapse+ko05034//Alcoholism+ko05031//Amphetamine addiction+ko05030//Cocaine addiction+ko04668//TNF signaling pathway+ko04261//Adrenergic signaling in…	XM_027374678.1 PREDICTED: Penaeus vannamei cyclic AMP-dependent transcription factor ATF-2-like (LOC113822147), mRNA	cyclic AMP-dependent transcription factor ATF-2-like [Penaeus vannamei] >APZ76510.1 ATF-2 [Penaeus vannamei]	bZIP transcription factor	[K] KOG1414 Transcriptional activator FOSB/c-Fos and related bZIP transcription factors	Cyclic AMP-dependent transcription factor ATF-2 OS=Rattus norvegicus OX=10116 GN=Atf2 PE=1 SV=2	GO:0003676//nucleic acid binding;GO:0003700//DNA-binding transcription factor activity
CL553.Contig6_All	0	0.54	5.754887502	0.000225218	2.62E-05		K00699//glucuronosyltransferase [EC:2.4.1.17]+ko00980//Metabolism of xenobiotics by cytochrome P450+ko00982//Drug metabolism - cytochrome P450+ko00983//Drug metabolism - other enzymes+ko00040//Pentose and glucuronate interconversions+ko00860//Porphyrin and chlorophyll metabolism+ko00053//Ascorbate and aldarate metabolism+ko00830//Retinol metabolism+ko05204//Chemical carcinogenesis+ko00140//Steroi…	XM_027357445.1 PREDICTED: Penaeus vannamei UDP-glucuronosyltransferase 2B14-like (LOC113806325), transcript variant X2, mRNA	UDP-glucuronosyltransferase 2B14-like isoform X2 [Penaeus vannamei]	UDP-glucoronosyl and UDP-glucosyl transferase	[GC] KOG1192 UDP-glucuronosyl and UDP-glucosyl transferase	UDP-glucuronosyltransferase 2B14 OS=Oryctolagus cuniculus OX=9986 GN=UGT2B14 PE=2 SV=1
CL961.Contig11_All	0	0.53	5.727920455	4.50E-06	3.86E-07			XR_003475538.1 PREDICTED: Penaeus vannamei uncharacterized LOC113803657 (LOC113803657), transcript variant X2, ncRNA
CL1406.Contig7_All	0	0.53	5.727920455	1.13E-08	6.91E-10		K17569//G patch domain-containing protein 2;K17569//G patch domain-containing protein 2;K17569//G patch domain-containing protein 2;K17569//G patch domain-containing protein 2;K17569//G patch domain-containing protein 2	XM_027373270.1 PREDICTED: Penaeus vannamei G patch domain-containing protein 2-like (LOC113820886), mRNA	G patch domain-containing protein 2-like [Penaeus vannamei]		[R] KOG0154 RNA-binding protein RBM5 and related proteins, contain G-patch and RRM domains		GO:0003676//nucleic acid binding
CL1062.Contig1_All	0.29	15.14	5.706168495	8.85E-298	8.31E-301			XM_027359460.1 PREDICTED: Penaeus vannamei chondroitin proteoglycan 2-like (LOC113808124), mRNA	hypothetical protein C7M84_009346 [Penaeus vannamei]	Nucleocapsid protein N			GO:0016020//membrane
Unigene17936_All	0.08	3.95	5.625708843	3.56E-13	1.45E-14			XM_027367648.1 PREDICTED: Penaeus vannamei crustacean calcium-binding protein 23-like (LOC113815627), mRNA	olfactory enriched transcipt 17.17, partial [Homarus americanus]		[T] KOG0032 Ca2+/calmodulin-dependent protein kinase, EF-Hand protein superfamily	Crustacean calcium-binding protein 23 OS=Faxonius limosus OX=28379 PE=1 SV=1	GO:0005509//calcium ion binding
CL3518.Contig2_All	0.55	27.11	5.623249684	7.53E-109	2.68E-111		K04636//guanine nucleotide-binding protein subunit alpha-14+ko04020//Calcium signaling pathway+ko05146//Amoebiasis+ko05142//Chagas disease (American trypanosomiasis);K04636//guanine nucleotide-binding protein subunit alpha-14+ko04020//Calcium signaling pathway+ko05146//Amoebiasis+ko05142//Chagas disease (American trypanosomiasis);K04636//guanine nucleotide-binding protein subunit alpha-14+ko04020…	LR597476.1 Sphaeramia orbicularis genome assembly, chromosome: 19	guanine nucleotide-binding protein subunit alpha-14 [Ornithorhynchus anatinus] >XP_028912172.1 guanine nucleotide-binding protein subunit alpha-14 [Ornithorhynchus anatinus]	G-protein alpha subunit	[T] KOG0085 G protein subunit Galphaq/Galphay, small G protein superfamily	Guanine nucleotide-binding protein subunit alpha-11 OS=Meleagris gallopavo OX=9103 GN=GNA11 PE=1 SV=1	GO:0001664//G protein-coupled receptor binding;GO:0005525//GTP binding;GO:0060158//phospholipase C-activating dopamine receptor signaling pathway;GO:0007188//adenylate cyclase-modulating G protein-coupled receptor signaling pathway;GO:0007186//G protein-coupled receptor signaling pathway;GO:0007186//G protein-coupled receptor signaling pathway;GO:0060158//phospholipase C-activating dopamine recep…
CL22.Contig2_All	0	0.47	5.554588852	6.18E-05	6.42E-06		K10955//mucin-2+ko05226//Gastric cancer+ko05146//Amoebiasis;K10955//mucin-2+ko05226//Gastric cancer+ko05146//Amoebiasis;K06265//dystroglycan 1+ko05414//Dilated cardiomyopathy (DCM)+ko05416//Viral myocarditis+ko05410//Hypertrophic cardiomyopathy (HCM)+ko05412//Arrhythmogenic right ventricular cardiomyopathy (ARVC)+ko04512//ECM-receptor interaction;K14971//nuclear receptor coactivator 6	XM_027376445.1 PREDICTED: Penaeus vannamei uncharacterized LOC113823757 (LOC113823757), mRNA	LOW QUALITY PROTEIN: mucin-2 [Fukomys damarensis]		[WV] KOG1216 von Willebrand factor and related coagulation proteins	Platelet glycoprotein Ib alpha chain OS=Homo sapiens OX=9606 GN=GP1BA PE=1 SV=2
CL1406.Contig1_All	0	0.45	5.491853096	3.20E-07	2.32E-08		K17569//G patch domain-containing protein 2;K17569//G patch domain-containing protein 2;K17569//G patch domain-containing protein 2;K17569//G patch domain-containing protein 2;K17569//G patch domain-containing protein 2	XM_027373270.1 PREDICTED: Penaeus vannamei G patch domain-containing protein 2-like (LOC113820886), mRNA	G patch domain-containing protein 2-like [Penaeus vannamei]		[R] KOG0154 RNA-binding protein RBM5 and related proteins, contain G-patch and RRM domains		GO:0003676//nucleic acid binding
CL2433.Contig6_All	0.12	5.37	5.483815777	7.96E-66	5.69E-68		K13184//ATP-dependent RNA helicase A [EC:3.6.4.13];K13184//ATP-dependent RNA helicase A [EC:3.6.4.13];K13184//ATP-dependent RNA helicase A [EC:3.6.4.13];K13184//ATP-dependent RNA helicase A [EC:3.6.4.13];K13184//ATP-dependent RNA helicase A [EC:3.6.4.13]	XM_027352733.1 PREDICTED: Penaeus vannamei ATP-dependent RNA helicase A-like (LOC113802200), transcript variant X2, mRNA	Dosage compensation regulator [Penaeus vannamei]	Helicase conserved C-terminal domain	[K] KOG0921 Dosage compensation complex, subunit MLE	ATP-dependent RNA helicase A OS=Bos taurus OX=9913 GN=DHX9 PE=1 SV=1	GO:0003723//RNA binding;GO:0004386//helicase activity;GO:0005524//ATP binding
Unigene18248_All	0.08	3.37	5.396604781	3.63E-11	1.73E-12		K06483//integrin alpha 4+ko05414//Dilated cardiomyopathy (DCM)+ko05410//Hypertrophic cardiomyopathy (HCM)+ko05412//Arrhythmogenic right ventricular cardiomyopathy (ARVC)+ko04640//Hematopoietic cell lineage+ko04810//Regulation of actin cytoskeleton+ko04512//ECM-receptor interaction+ko04510//Focal adhesion+ko04514//Cell adhesion molecules (CAMs)+ko05140//Leishmaniasis+ko04672//Intestinal immune net…	XM_027380316.1 PREDICTED: Penaeus vannamei integrin alpha-PS3-like (LOC113827435), mRNA	integrin alpha 4 [Penaeus vannamei]	Integrin alpha	[W] KOG3637 Vitronectin receptor, alpha subunit	Integrin alpha-4 OS=Mus musculus OX=10090 GN=Itga4 PE=1 SV=1	GO:0007229//integrin-mediated signaling pathway;GO:0007155//cell adhesion;GO:0008305//integrin complex;GO:0007229//integrin-mediated signaling pathway;GO:0007229//integrin-mediated signaling pathway;GO:0007229//integrin-mediated signaling pathway;GO:0007229//integrin-mediated signaling pathway;GO:0008305//integrin complex;GO:0007155//cell adhesion
CL2246.Contig3_All	0.03	1.16	5.273018494	3.37E-15	1.20E-16	zf-C2H2	K00753//glycoprotein 3-alpha-L-fucosyltransferase [EC:2.4.1.214]+ko01100//Metabolic pathways;K18626//trichohyalin;K12484//Rab11 family-interacting protein 1/2/5+ko04144//Endocytosis;K18626//trichohyalin;K18626//trichohyalin	XM_027354404.1 PREDICTED: Penaeus vannamei SAFB-like transcription modulator (LOC113803611), transcript variant X4, mRNA	SAFB-like transcription modulator isoform X4 [Penaeus vannamei]	RNA recognition motif. (a.k.a. RRM, RBD, or RNP domain)	[K] KOG4661 Hsp27-ERE-TATA-binding protein/Scaffold attachment factor (SAF-B)	SAFB-like transcription modulator OS=Xenopus laevis OX=8355 GN=sltm PE=2 SV=1
Unigene17450_All	0.13	4.96	5.253756592	1.58E-29	2.85E-31			XM_027354653.1 PREDICTED: Penaeus vannamei uncharacterized LOC113803839 (LOC113803839), mRNA	hypothetical protein C7M84_003454 [Penaeus vannamei]	Domain of unknown function (DUF4619)
Unigene17636_All	0.1	3.71	5.213347282	9.48E-10	5.17E-11		K20473//neuroblastoma-amplified sequence	XM_027353530.1 PREDICTED: Penaeus vannamei uncharacterized LOC113802880 (LOC113802880), mRNA	uncharacterized protein LOC113802890 [Penaeus vannamei]	Domain of unknown function (DUF3898)
Unigene24639_All	0.24	8.89	5.211077108	1.81E-09	1.02E-10		K10955//mucin-2+ko05226//Gastric cancer+ko05146//Amoebiasis;K10955//mucin-2+ko05226//Gastric cancer+ko05146//Amoebiasis;K01183//chitinase [EC:3.2.1.14]+ko00520//Amino sugar and nucleotide sugar metabolism+ko01100//Metabolic pathways;K10955//mucin-2+ko05226//Gastric cancer+ko05146//Amoebiasis;K10955//mucin-2+ko05226//Gastric cancer+ko05146//Amoebiasis	XM_027357358.1 PREDICTED: Penaeus vannamei histidine-rich glycoprotein-like (LOC113806234), mRNA	mucin-2-like [Oreochromis niloticus]	Gene regulated by oestrogen in breast cancer	[T] LSE0513 C 7-transmembrane receptor	Mucin-5AC OS=Homo sapiens OX=9606 GN=MUC5AC PE=1 SV=4	GO:0016021//integral component of membrane
CL937.Contig4_All	0	0.36	5.169925001	0.00011872	1.30E-05		K17338//receptor expression-enhancing protein 1/2/3/4;K17338//receptor expression-enhancing protein 1/2/3/4;K17338//receptor expression-enhancing protein 1/2/3/4;K17338//receptor expression-enhancing protein 1/2/3/4;K17338//receptor expression-enhancing protein 1/2/3/4	XM_027380953.1 PREDICTED: Penaeus vannamei uncharacterized LOC113828009 (LOC113828009), transcript variant X1, mRNA	hypothetical protein C7M84_002230 [Penaeus vannamei]	TB2/DP1, HVA22 family	[V] KOG1726 HVA22/DP1 gene product-related proteins	Receptor expression-enhancing protein 1 OS=Mus musculus OX=10090 GN=Reep1 PE=1 SV=1	GO:0016021//integral component of membrane
CL263.Contig4_All	0	0.36	5.169925001	8.43E-08	5.69E-09		K09667//protein O-GlcNAc transferase [EC:2.4.1.255]+ko00514//Other types of O-glycan biosynthesis+ko04931//Insulin resistance;K09667//protein O-GlcNAc transferase [EC:2.4.1.255]+ko00514//Other types of O-glycan biosynthesis+ko04931//Insulin resistance;K09667//protein O-GlcNAc transferase [EC:2.4.1.255]+ko00514//Other types of O-glycan biosynthesis+ko04931//Insulin resistance;K09667//protein O-Glc…	XM_027377828.1 PREDICTED: Penaeus vannamei UDP-N-acetylglucosamine--peptide N-acetylglucosaminyltransferase 110 kDa subunit-like (LOC113825049), transcript variant X5, mRNA	UDP-N-acetylglucosamine--peptide N-acetylglucosaminyltransferase 110 kDa subunit-like isoform X2 [Penaeus vannamei]	Glycosyl transferase family 41	[GOT] KOG4626 O-linked N-acetylglucosamine transferase OGT	UDP-N-acetylglucosamine--peptide N-acetylglucosaminyltransferase 110 kDa subunit OS=Homo sapiens OX=9606 GN=OGT PE=1 SV=3	GO:0006493//protein O-linked glycosylation;GO:0016757//transferase activity, transferring glycosyl groups;GO:0006493//protein O-linked glycosylation
Unigene24527_All	0.13	4.61	5.148183222	6.60E-09	3.95E-10
CL58.Contig2_All	0.02	0.69	5.108524457	4.33E-08	2.82E-09		K04679//MAD, mothers against decapentaplegic interacting protein+ko04144//Endocytosis+ko04350//TGF-beta signaling pathway;K04679//MAD, mothers against decapentaplegic interacting protein+ko04144//Endocytosis+ko04350//TGF-beta signaling pathway;K17603//zinc finger FYVE domain-containing protein 1+ko04140//Autophagy - animal;K04679//MAD, mothers against decapentaplegic interacting protein+ko04144//…	XM_027375801.1 PREDICTED: Penaeus vannamei zinc finger FYVE domain-containing protein 21-like (LOC113823149), mRNA	zinc finger FYVE domain-containing protein 21-like [Penaeus vannamei] >ROT81073.1 hypothetical protein C7M84_000178 [Penaeus vannamei]	Zinc finger FYVE domain-containing protein 21 C-terminus	[R] KOG1729 FYVE finger containing protein	Myotubularin-related protein 4 OS=Xenopus laevis OX=8355 GN=mtmr4 PE=2 SV=1	GO:0046872//metal ion binding
Unigene23181_All	0.08	2.67	5.060695932	4.58E-08	2.99E-09		K23014//inactive dipeptidyl peptidase 10;K08796//BR serine/threonine kinase [EC:2.7.11.1];K17388//Rho-associated protein kinase 2 [EC:2.7.11.1]+ko04360//Axon guidance+ko04024//cAMP signaling pathway+ko04022//cGMP-PKG signaling pathway+ko05132//Salmonella infection+ko05130//Pathogenic Escherichia coli infection+ko05131//Shigellosis+ko04810//Regulation of actin cytoskeleton+ko04510//Focal adhesion+…	XM_027351693.1 PREDICTED: Penaeus vannamei uncharacterized LOC113800889 (LOC113800889), mRNA	PREDICTED: uncharacterized protein LOC109462259 [Branchiostoma belcheri]	Type-A lantibiotic
CL1549.Contig5_All	0.09	2.9	5.009984089	1.55E-33	2.44E-35		K01227//mannosyl-glycoprotein endo-beta-N-acetylglucosaminidase [EC:3.2.1.96]+ko00511//Other glycan degradation;K01227//mannosyl-glycoprotein endo-beta-N-acetylglucosaminidase [EC:3.2.1.96]+ko00511//Other glycan degradation;K01227//mannosyl-glycoprotein endo-beta-N-acetylglucosaminidase [EC:3.2.1.96]+ko00511//Other glycan degradation;K01227//mannosyl-glycoprotein endo-beta-N-acetylglucosaminidase…	XM_027359511.1 PREDICTED: Penaeus vannamei cytosolic endo-beta-N-acetylglucosaminidase-like (LOC113808174), transcript variant X6, mRNA	Cytosolic endo-beta-N-acetylglucosaminidase [Penaeus vannamei]	Glycosyl hydrolase family 85	[R] KOG2331 Predicted glycosylhydrolase	Cytosolic endo-beta-N-acetylglucosaminidase OS=Homo sapiens OX=9606 GN=ENGASE PE=1 SV=1	GO:0033925//mannosyl-glycoprotein endo-beta-N-acetylglucosaminidase activity;GO:0005737//cytoplasm;GO:0005737//cytoplasm
CL692.Contig3_All	0	0.31	4.95419631	0.000118783	1.30E-05		K05704//tyrosine-protein kinase Src [EC:2.7.10.2]+ko04360//Axon guidance+ko04144//Endocytosis+ko05131//Shigellosis+ko04810//Regulation of actin cytoskeleton+ko04510//Focal adhesion+ko01521//EGFR tyrosine kinase inhibitor resistance+ko01522//Endocrine resistance+ko04919//Thyroid hormone signaling pathway+ko04917//Prolactin signaling pathway+ko04915//Estrogen signaling pathway+ko04912//GnRH signali…	XM_027354175.1 PREDICTED: Penaeus vannamei tyrosine-protein kinase Src64B-like (LOC113803399), mRNA	tyrosine-protein kinase Src64B-like [Penaeus vannamei]	Protein tyrosine and serine/threonine kinase	[T] KOG0197 Tyrosine kinases	Tyrosine-protein kinase Src64B OS=Drosophila melanogaster OX=7227 GN=Src64B PE=1 SV=3	GO:0004715//non-membrane spanning protein tyrosine kinase activity;GO:0005524//ATP binding
CL102.Contig4_All	0	0.31	4.95419631	1.68E-05	1.57E-06		K00889//1-phosphatidylinositol-4-phosphate 5-kinase [EC:2.7.1.68]+ko04144//Endocytosis+ko04810//Regulation of actin cytoskeleton+ko04070//Phosphatidylinositol signaling system+ko04072//Phospholipase D signaling pathway+ko04666//Fc gamma R-mediated phagocytosis+ko00562//Inositol phosphate metabolism+ko05231//Choline metabolism in cancer+ko01100//Metabolic pathways;K00889//1-phosphatidylinositol-4-…	XM_027379030.1 PREDICTED: Penaeus vannamei phosphatidylinositol 4-phosphate 5-kinase type-1 beta-like (LOC113826159), mRNA	phosphatidylinositol 4-phosphate 5-kinase type-1 beta-like [Penaeus vannamei]	Phosphatidylinositol-4-phosphate 5-Kinase	[T] KOG0229 Phosphatidylinositol-4-phosphate 5-kinase	Phosphatidylinositol 4-phosphate 5-kinase type-1 alpha OS=Rattus norvegicus OX=10116 GN=Pip5k1a PE=1 SV=1	GO:0016307//phosphatidylinositol phosphate kinase activity;GO:0005524//ATP binding
Unigene17850_All	0.07	2.13	4.927354698	5.84E-07	4.41E-08			XR_003475586.1 PREDICTED: Penaeus vannamei uncharacterized LOC113804324 (LOC113804324), ncRNA	calponin homology domain-containing protein DDB_G0272472-like isoform X2 [Penaeus vannamei]	JAKMIP CC3 domain			GO:0008017//microtubule binding;GO:0019900//kinase binding;GO:0016301//kinase activity
Unigene22022_All	0.3	8.46	4.817623258	3.20E-27	6.31E-29		K21125//mucin-5AC+ko04657//IL-17 signaling pathway;K10955//mucin-2+ko05226//Gastric cancer+ko05146//Amoebiasis;K21125//mucin-5AC+ko04657//IL-17 signaling pathway;K10955//mucin-2+ko05226//Gastric cancer+ko05146//Amoebiasis;K10955//mucin-2+ko05226//Gastric cancer+ko05146//Amoebiasis	XM_027362049.1 PREDICTED: Penaeus vannamei sarcoplasmic calcium-binding protein, beta chain (LOC113810364), mRNA	sarcoplasmic calcium-binding protein, beta chain [Penaeus vannamei] >ROT72773.1 Sarcoplasmic calcium-binding protein, beta chain [Penaeus vannamei]	EF hand	[GO] KOG4157 beta-1,6-N-acetylglucosaminyltransferase, contains WSC domain	Sarcoplasmic calcium-binding protein, beta chain OS=Penaeus sp. OX=6688 PE=1 SV=1	GO:0005509//calcium ion binding
Unigene18767_All	0.12	3.18	4.727920455	1.10E-06	8.61E-08				hypothetical protein C7M84_018826 [Penaeus vannamei]
Unigene17431_All	0.1	2.55	4.672425342	3.86E-06	3.28E-07
Unigene20445_All	0.21	5.3	4.657531127	4.47E-12	1.98E-13
Unigene22994_All	0.14	3.47	4.631436931	7.19E-06	6.38E-07			XR_003476281.1 PREDICTED: Penaeus vannamei uncharacterized LOC113812040 (LOC113812040), ncRNA	hypothetical protein C7M84_010145 [Penaeus vannamei]
Unigene20522_All	0.22	5.42	4.622717423	8.49E-12	3.85E-13			XM_027351045.1 PREDICTED: Penaeus vannamei flightin-like (LOC113800295), mRNA	mucin-2-like, partial [Oncorhynchus kisutch]
CL483.Contig5_All	0.15	3.61	4.588964431	1.62E-11	7.49E-13			XR_003476117.1 PREDICTED: Penaeus vannamei uncharacterized LOC113810233 (LOC113810233), ncRNA
Unigene24789_All	0.21	4.98	4.567684509	1.34E-05	1.24E-06			XR_003475811.1 PREDICTED: Penaeus vannamei uncharacterized LOC113806576 (LOC113806576), ncRNA	uncharacterized protein LOC111418016 [Onthophagus taurus]	Ion channel inhibitory toxin		U-scoloptoxin(19)-Tl1a (Fragment) OS=Thereuopoda longicornis OX=353555 PE=2 SV=1
Unigene17445_All	0.62	14.55	4.552607127	8.99E-56	7.53E-58		K10955//mucin-2+ko05226//Gastric cancer+ko05146//Amoebiasis;K05465//angiopoietin 1+ko05323//Rheumatoid arthritis+ko04151//PI3K-Akt signaling pathway+ko04010//MAPK signaling pathway+ko04014//Ras signaling pathway+ko04015//Rap1 signaling pathway+ko04066//HIF-1 signaling pathway;K10955//mucin-2+ko05226//Gastric cancer+ko05146//Amoebiasis;K10104//ficolin;K18400//KAT8 regulatory NSL complex subunit 1	XR_003477565.1 PREDICTED: Penaeus vannamei techylectin-5A-like (LOC113824943), transcript variant X2, misc_RNA	Techylectin-5B [Armadillidium nasatum]	Fibrinogen beta and gamma chains, C-terminal globular domain	[A] KOG1869 Splicing coactivator SRm160/300, subunit SRm300	Mucin-5AC OS=Homo sapiens OX=9606 GN=MUC5AC PE=1 SV=4
CL1194.Contig7_All	0.3	6.96	4.5360529	1.63E-25	3.46E-27			XM_027378419.1 PREDICTED: Penaeus vannamei uncharacterized LOC113825584 (LOC113825584), mRNA	uncharacterized protein LOC113825584 [Penaeus vannamei] >ROT85214.1 hypothetical protein C7M84_020035 [Penaeus vannamei]	Alcohol dehydrogenase transcription factor Myb/SANT-like	[K] TWOG0493 Transcription factor		GO:0003677//DNA binding;GO:0005634//nucleus;GO:0005634//nucleus
Unigene22359_All	0.2	4.64	4.5360529	1.10E-10	5.47E-12				hypothetical protein C7M84_024736 [Penaeus vannamei]				GO:0016021//integral component of membrane
Unigene20042_All	0.16	3.7	4.531381461	1.10E-10	5.47E-12	TF_bZIP	K04955//hyperpolarization activated cyclic nucleotide-gated potassium channel 2+ko04024//cAMP signaling pathway;K08187//MFS transporter, MCP family, solute carrier family 16 (monocarboxylic acid transporters), member 10+ko04919//Thyroid hormone signaling pathway+ko04974//Protein digestion and absorption;K14832//ribosome biogenesis protein MAK21;K04352//Ras GTPase-activating protein 1+ko04360//Axo…	XM_027365824.1 PREDICTED: Penaeus vannamei uncharacterized LOC113813764 (LOC113813764), mRNA	putative RNA-directed DNA polymerase from transposon X-element [Anabarilius grahami]	Reverse transcriptase (RNA-dependent DNA polymerase)	[R] KOG1075 FOG: Reverse transcriptase	RNA-directed DNA polymerase from mobile element jockey OS=Drosophila melanogaster OX=7227 GN=pol PE=1 SV=1	GO:0003964//RNA-directed DNA polymerase activity
Unigene17516_All	0.07	1.58	4.496425826	2.47E-05	2.41E-06	Homeobox	K06237//collagen, type IV, alpha+ko05222//Small cell lung cancer+ko04512//ECM-receptor interaction+ko04510//Focal adhesion+ko04933//AGE-RAGE signaling pathway in diabetic complications+ko05146//Amoebiasis+ko04974//Protein digestion and absorption+ko05200//Pathways in cancer+ko04151//PI3K-Akt signaling pathway+ko04926//Relaxin signaling pathway+ko05165//Human papillomavirus infection;K06237//colla…	XM_027361437.1 PREDICTED: Penaeus vannamei neuroblast differentiation-associated protein AHNAK-like (LOC113809767), mRNA	neuroblast differentiation-associated protein AHNAK-like [Penaeus vannamei]	Plasmodium histidine-rich protein (HRPII/III)	[W] KOG3544 Collagens (type IV and type XIII), and related proteins	Collagen alpha-5(IV) chain OS=Canis lupus familiaris OX=9615 GN=COL4A5 PE=2 SV=2	GO:0016021//integral component of membrane
Unigene21460_All	0.19	4.28	4.493539473	2.47E-05	2.41E-06
CL569.Contig1_All	0.1	2.25	4.491853096	2.08E-10	1.06E-11		K08843//leucine-rich repeat kinase 1 [EC:2.7.11.1];K22656//immunoglobulin superfamily member 9B;K06065//nuclear receptor co-repressor 2+ko04330//Notch signaling pathway+ko05169//Epstein-Barr virus infection;K16803//cytoskeleton-associated protein 5;K14401//cleavage and polyadenylation specificity factor subunit 1+ko03015//mRNA surveillance pathway	XM_027377039.1 PREDICTED: Penaeus vannamei uncharacterized LOC113824300 (LOC113824300), mRNA	uncharacterized protein LOC113824300 [Penaeus vannamei]	RNase H-like domain found in reverse transcriptase	[R] KOG0017 FOG: Transposon-encoded proteins with TYA, reverse transcriptase, integrase domains in various combinations	Retrovirus-related Pol polyprotein from transposon 412 OS=Drosophila melanogaster OX=7227 GN=POL PE=4 SV=1
Unigene21973_All	0.17	3.75	4.463283944	1.50E-15	5.23E-17			JF838196.1 Penaeus monodon aquaporin 1 (AQP1) mRNA, complete cds
CL2834.Contig2_All	0	0.22	4.459431619	0.000118741	1.30E-05		K12169//Kip1 ubiquitination-promoting complex protein 1 [EC:2.3.2.27];K12169//Kip1 ubiquitination-promoting complex protein 1 [EC:2.3.2.27];K12169//Kip1 ubiquitination-promoting complex protein 1 [EC:2.3.2.27];K12169//Kip1 ubiquitination-promoting complex protein 1 [EC:2.3.2.27]	XM_027360860.1 PREDICTED: Penaeus vannamei E3 ubiquitin-protein ligase RNF123-like (LOC113809315), transcript variant X2, mRNA	E3 ubiquitin-protein ligase RNF123-like [Penaeus vannamei] >XP_027216661.1 E3 ubiquitin-protein ligase RNF123-like [Penaeus vannamei] >ROT73610.1 E3 ubiquitin-protein ligase [Penaeus vannamei]	SPRY domain	[A] KOG2242 Scaffold/matrix specific factor hnRNP-U/SAF-A, contains SPRY domain	RING finger and SPRY domain-containing protein 1 OS=Mus musculus OX=10090 GN=Rspry1 PE=1 SV=1	GO:0046872//metal ion binding
Unigene12136_All	0.24	5.22	4.442943496	3.32E-19	9.39E-21			CP050644.1 Canis lupus familiaris breed Labrador retriever chromosome 13b
Unigene17482_All	0.3	6.42	4.419538892	4.57E-05	4.67E-06		K15009//SH3 and multiple ankyrin repeat domains protein+ko04724//Glutamatergic synapse		hypothetical protein KP79_PYT10267 [Mizuhopecten yessoensis]	D domain of beta-TrCP
Unigene25658_All	0.25	5.29	4.403267722	2.19E-50	2.09E-52		K06237//collagen, type IV, alpha+ko05222//Small cell lung cancer+ko04512//ECM-receptor interaction+ko04510//Focal adhesion+ko04933//AGE-RAGE signaling pathway in diabetic complications+ko05146//Amoebiasis+ko04974//Protein digestion and absorption+ko05200//Pathways in cancer+ko04151//PI3K-Akt signaling pathway+ko04926//Relaxin signaling pathway+ko05165//Human papillomavirus infection;K06237//colla…	XM_027363538.1 PREDICTED: Penaeus vannamei collagen alpha-1(XV) chain-like (LOC113811738), mRNA	uncharacterized protein LOC116289639 [Actinia tenebrosa]	Collagen triple helix repeat (20 copies)	[W] KOG3544 Collagens (type IV and type XIII), and related proteins	Collagen alpha-1(I) chain (Fragments) OS=Megalonyx jeffersonii OX=2576014 PE=1 SV=1	GO:0005581//collagen trimer
CL2270.Contig4_All	0.22	4.43	4.33173127	9.11E-45	1.04E-46	Homeobox	K14713//solute carrier family 39 (zinc transporter), member 7;K14713//solute carrier family 39 (zinc transporter), member 7;K14713//solute carrier family 39 (zinc transporter), member 7;K14713//solute carrier family 39 (zinc transporter), member 7;K14713//solute carrier family 39 (zinc transporter), member 7	XM_027366445.1 PREDICTED: Penaeus vannamei protein catecholamines up-like (LOC113814389), mRNA	protein catecholamines up-like [Penaeus vannamei]	ZIP Zinc transporter	[S] KOG4725 Uncharacterized conserved protein	Zinc transporter zipt-7.2 OS=Caenorhabditis briggsae OX=6238 GN=zipt-7.2 PE=3 SV=2	GO:0016021//integral component of membrane;GO:0046873//metal ion transmembrane transporter activity
CL2161.Contig1_All	0.34	6.81	4.324048147	5.85E-82	3.03E-84		K18080//tensin;K18080//tensin;K18080//tensin	XM_027374841.1 PREDICTED: Penaeus vannamei tensin-1-like (LOC113822306), mRNA	Tensin [Penaeus vannamei]	Phosphotyrosine-binding domain	[TZ] KOG1930 Focal adhesion protein Tensin, contains PTB domain	Tensin-3 OS=Homo sapiens OX=9606 GN=TNS3 PE=1 SV=2
Unigene21669_All	0.13	2.56	4.299560282	2.49E-13	1.00E-14		K20478//golgin subfamily B member 1;K20478//golgin subfamily B member 1;K20478//golgin subfamily B member 1;K20478//golgin subfamily B member 1;K18626//trichohyalin	XM_027360925.1 PREDICTED: Penaeus vannamei golgin subfamily A member 6-like protein 22 (LOC113809357), transcript variant X1, mRNA	putative janus kinase and microtubule-interacting protein 3 isoform X7 [Penaeus vannamei]	Protein of unknown function (DUF4022)	[S] LSE0506 C Uncharacterized protein with conserved cysteine	Janus kinase and microtubule-interacting protein 1 OS=Bos taurus OX=9913 GN=JAKMIP1 PE=2 SV=1	GO:0019900//kinase binding;GO:0016301//kinase activity;GO:0008017//microtubule binding
Unigene11006_All	0.13	2.55	4.293913719	0.000156402	1.75E-05		K16351//netrin-G2 ligand+ko04360//Axon guidance+ko04514//Cell adhesion molecules (CAMs)	XM_029791226.1 PREDICTED: Octopus vulgaris GATA zinc finger domain-containing protein 14-like (LOC115221009), partial mRNA	putative sodium-coupled monocarboxylate transporter 1 [Apostichopus japonicus]				GO:0005524//ATP binding;GO:0022857//transmembrane transporter activity;GO:0042626//ATPase-coupled transmembrane transporter activity;GO:0016021//integral component of membrane
Unigene24638_All	0.27	5.23	4.275779634	0.000156429	1.75E-05	zf-C2H2	K10955//mucin-2+ko05226//Gastric cancer+ko05146//Amoebiasis;K10955//mucin-2+ko05226//Gastric cancer+ko05146//Amoebiasis;K10955//mucin-2+ko05226//Gastric cancer+ko05146//Amoebiasis;K10955//mucin-2+ko05226//Gastric cancer+ko05146//Amoebiasis;K10955//mucin-2+ko05226//Gastric cancer+ko05146//Amoebiasis	XM_027357358.1 PREDICTED: Penaeus vannamei histidine-rich glycoprotein-like (LOC113806234), mRNA	LOW QUALITY PROTEIN: mucin-2-like [Folsomia candida]	PIN domain	[T] LSE0513 C 7-transmembrane receptor	Salivary glue protein Sgs-3 OS=Drosophila yakuba OX=7245 GN=Sgs3 PE=2 SV=3
Unigene17480_All	0.67	12.86	4.262585737	0.000156456	1.75E-05			XM_027356695.1 PREDICTED: Penaeus vannamei uncharacterized LOC113805641 (LOC113805641), transcript variant X2, mRNA
Unigene23797_All	0.11	2.11	4.26166757	1.34E-05	1.24E-06			XM_027355087.1 PREDICTED: Penaeus vannamei uncharacterized LOC113804245 (LOC113804245), mRNA	uncharacterized protein LOC113809645 [Penaeus vannamei]
CL2540.Contig1_All	0.17	3.26	4.261265313	3.46E-09	2.01E-10		K00820//glucosamine---fructose-6-phosphate aminotransferase (isomerizing) [EC:2.6.1.16]+ko00250//Alanine, aspartate and glutamate metabolism+ko04931//Insulin resistance+ko00520//Amino sugar and nucleotide sugar metabolism+ko01100//Metabolic pathways;K00820//glucosamine---fructose-6-phosphate aminotransferase (isomerizing) [EC:2.6.1.16]+ko00250//Alanine, aspartate and glutamate metabolism+ko04931/…	XM_027353456.1 PREDICTED: Penaeus vannamei glutamine--fructose-6-phosphate aminotransferase [isomerizing] 2-like (LOC113802825), transcript variant X1, mRNA	glutamine--fructose-6-phosphate aminotransferase [isomerizing] 2-like isoform X1 [Penaeus vannamei] >XP_027209258.1 glutamine--fructose-6-phosphate aminotransferase [isomerizing] 2-like isoform X2 [Penaeus vannamei]	Glutamine amidotransferase domain	[M] KOG1268 Glucosamine 6-phosphate synthetases, contain amidotransferase and phosphosugar isomerase domains	Glutamine--fructose-6-phosphate aminotransferase [isomerizing] 1 OS=Rattus norvegicus OX=10116 GN=Gfpt1 PE=1 SV=3
Unigene17681_All	0.21	3.97	4.240677774	9.09E-09	5.48E-10		K10955//mucin-2+ko05226//Gastric cancer+ko05146//Amoebiasis;K10955//mucin-2+ko05226//Gastric cancer+ko05146//Amoebiasis;K10955//mucin-2+ko05226//Gastric cancer+ko05146//Amoebiasis;K10955//mucin-2+ko05226//Gastric cancer+ko05146//Amoebiasis;K10955//mucin-2+ko05226//Gastric cancer+ko05146//Amoebiasis	XM_027350715.1 PREDICTED: Penaeus vannamei uncharacterized LOC113799997 (LOC113799997), mRNA	uncharacterized protein LOC113799997 [Penaeus vannamei] >ROT83073.1 peritrophic membrane chitin binding protein [Penaeus vannamei]				GO:0005975//carbohydrate metabolic process;GO:0003824//catalytic activity
Unigene17913_All	0.13	2.45	4.236198221	0.000156483	1.75E-05			XM_027353530.1 PREDICTED: Penaeus vannamei uncharacterized LOC113802880 (LOC113802880), mRNA	Protein NYNRIN [Penaeus vannamei]	DNA polymerase type B, organellar and viral			GO:0000166//nucleotide binding;GO:0003887//DNA-directed DNA polymerase activity;GO:0006260//DNA replication;GO:0003677//DNA binding;GO:0006260//DNA replication
CL1000.Contig4_All	1.19	22.03	4.210436016	0	0		K14290//exportin-1+ko03013//RNA transport+ko04013//MAPK signaling pathway - fly+ko03008//Ribosome biogenesis in eukaryotes+ko05164//Influenza A+ko05166//Human T-cell leukemia virus 1 infection;K14290//exportin-1+ko03013//RNA transport+ko04013//MAPK signaling pathway - fly+ko03008//Ribosome biogenesis in eukaryotes+ko05164//Influenza A+ko05166//Human T-cell leukemia virus 1 infection;K14290//expor…	XM_027379117.1 PREDICTED: Penaeus vannamei exportin-1-like (LOC113826243), mRNA	Exportin-1 [Armadillidium nasatum]	CRM1 C terminal	[YU] KOG2020 Nuclear transport receptor CRM1/MSN5 (importin beta superfamily)	Exportin-1 OS=Mus musculus OX=10090 GN=Xpo1 PE=1 SV=1	GO:0006886//intracellular protein transport;GO:0006886//intracellular protein transport;GO:0005049//nuclear export signal receptor activity;GO:0005634//nucleus;GO:0008536//Ran GTPase binding;GO:0005634//nucleus
CL3095.Contig3_All	0.1	1.85	4.209453366	1.77E-13	7.06E-15			XM_027380880.1 PREDICTED: Penaeus vannamei uncharacterized LOC113827929 (LOC113827929), mRNA	uncharacterized protein LOC113827929 [Penaeus vannamei]	P21-Rho-binding domain
Unigene17421_All	0.32	5.71	4.157346935	1.03E-15	3.57E-17			XM_027360834.1 PREDICTED: Penaeus vannamei uncharacterized LOC113809297 (LOC113809297), mRNA	putative mucolipin-3 [Penaeus vannamei]	PDGF/VEGF domain			GO:0005261//cation channel activity
CL2581.Contig2_All	0.53	9.12	4.10496956	6.56E-26	1.36E-27
Unigene22129_All	0.18	3.04	4.078002512	2.01E-07	1.42E-08			XM_027377238.1 PREDICTED: Penaeus vannamei microtubule-associated protein tau-like (LOC113824507), mRNA
CL197.Contig2_All	0.36	6.07	4.075627705	2.26E-18	6.64E-20		K04498//E1A/CREB-binding protein [EC:2.3.1.48]+ko04024//cAMP signaling pathway+ko04630//Jak-STAT signaling pathway+ko04350//TGF-beta signaling pathway+ko04919//Thyroid hormone signaling pathway+ko04916//Melanogenesis+ko04310//Wnt signaling pathway+ko04720//Long-term potentiation+ko05215//Prostate cancer+ko05211//Renal cell carcinoma+ko05200//Pathways in cancer+ko05203//Viral carcinogenesis+ko0520…	XM_027360331.1 PREDICTED: Penaeus vannamei CREB-binding protein-like (LOC113808837), mRNA	LOW QUALITY PROTEIN: CREB-binding protein-like [Penaeus vannamei]	TAZ zinc finger	[K] KOG1778 CREB binding protein/P300 and related TAZ Zn-finger proteins	Histone acetyltransferase p300 OS=Mus musculus OX=10090 GN=Ep300 PE=1 SV=2	GO:0000123//histone acetyltransferase complex;GO:0004402//histone acetyltransferase activity;GO:0006355//regulation of transcription, DNA-templated;GO:0003713//transcription coactivator activity;GO:0000123//histone acetyltransferase complex;GO:0006355//regulation of transcription, DNA-templated;GO:0042025//host cell nucleus;GO:0000123//histone acetyltransferase complex;GO:0006355//regulation of t…
CL793.Contig5_All	0.17	2.82	4.052088511	3.93E-10	2.05E-11			XM_027369037.1 PREDICTED: Penaeus vannamei extended synaptotagmin-2-like (LOC113817041), mRNA	extended synaptotagmin-2-like [Penaeus vannamei]	C2 domain	[R] KOG1012 Ca2+-dependent lipid-binding protein CLB1/vesicle protein vp115/Granuphilin A, contains C2 domain
CL1215.Contig3_All	0.35	5.74	4.03562391	2.09E-29	3.79E-31		K10341//WD repeat and SOCS box-containing protein 1;K10341//WD repeat and SOCS box-containing protein 1;K10341//WD repeat and SOCS box-containing protein 1;K10341//WD repeat and SOCS box-containing protein 1	XM_027376910.1 PREDICTED: Penaeus vannamei WD repeat and SOCS box-containing protein 1-like (LOC113824161), transcript variant X3, mRNA	WD repeat and SOCS box-containing protein 1-like isoform X3 [Penaeus vannamei]	WD domain, G-beta repeat	[R] KOG0266 WD40 repeat-containing protein	WD repeat and SOCS box-containing protein 1 OS=Danio rerio OX=7955 GN=wsb1 PE=2 SV=1	GO:0035556//intracellular signal transduction;GO:0035556//intracellular signal transduction;GO:0035556//intracellular signal transduction;GO:0035556//intracellular signal transduction;GO:0035556//intracellular signal transduction
Unigene12960_All	0.69	11.17	4.016889014	1.33E-10	6.69E-12		K03250//translation initiation factor 3 subunit E+ko03013//RNA transport+ko05160//Hepatitis C	AP022685.1 Epinephelus fuscoguttatus DNA, LG11, complete sequence	hypothetical protein M959_06980, partial [Chaetura pelagica]				GO:0008237//metallopeptidase activity;GO:0045901//positive regulation of translational elongation;GO:0003746//translation elongation factor activity;GO:0045905//positive regulation of translational termination;GO:0051056//regulation of small GTPase mediated signal transduction;GO:0045901//positive regulation of translational elongation;GO:0008270//zinc ion binding;GO:0045905//positive regulation …
CL1509.Contig2_All	2.25	35.51	3.980228454	1.53E-24	3.43E-26			XR_003477586.1 PREDICTED: Penaeus vannamei uncharacterized LOC113825375 (LOC113825375), ncRNA
Unigene20281_All	0.33	5.09	3.947127727	8.49E-10	4.61E-11			XM_027357870.1 PREDICTED: Penaeus vannamei uncharacterized LOC113806701 (LOC113806701), mRNA	Microtubule-associated tumor suppressor candidate 2 [Penaeus vannamei]
Unigene17919_All	0.33	4.93	3.901049717	7.26E-48	7.48E-50			XR_003476545.1 PREDICTED: Penaeus vannamei CBP80/20-dependent translation initiation factor-like (LOC113814660), misc_RNA	CBP80/20-dependent translation initiation factor-like isoform X2 [Penaeus vannamei]	MIF4G domain	[J] KOG3942 MIF4G domain-containing protein	CBP80/20-dependent translation initiation factor OS=Xenopus tropicalis OX=8364 GN=ctif PE=2 SV=1	GO:0003743//translation initiation factor activity;GO:0003743//translation initiation factor activity;GO:0003723//RNA binding
CL933.Contig6_All	0.32	4.75	3.891783703	4.18E-06	3.56E-07		K19464//pleckstrin homology domain-containing family G member 5+ko05200//Pathways in cancer		uncharacterized histidine-rich protein DDB_G0274557-like, partial [Strongylocentrotus purpuratus]
CL964.Contig2_All	0.52	7.62	3.873207469	1.84E-52	1.67E-54		K07376//cGMP-dependent protein kinase 1 [EC:2.7.11.12]+ko04022//cGMP-PKG signaling pathway+ko04730//Long-term depression+ko04611//Platelet activation+ko04714//Thermogenesis+ko04713//Circadian entrainment+ko04540//Gap junction+ko04970//Salivary secretion+ko04270//Vascular smooth muscle contraction+ko04740//Olfactory transduction+ko04923//Regulation of lipolysis in adipocytes;K07376//cGMP-dependent…	XM_027365870.1 PREDICTED: Penaeus vannamei cGMP-dependent protein kinase, isozyme 2 forms cD5/T2-like (LOC113813818), transcript variant X1, mRNA	cGMP-dependent protein kinase, isozyme 2 forms cD5/T2-like isoform X1 [Penaeus vannamei]	Protein kinase domain	[T] KOG0614 cGMP-dependent protein kinase	cGMP-dependent protein kinase, isozyme 2 forms cD5/T2 OS=Drosophila melanogaster OX=7227 GN=for PE=2 SV=3	GO:0004692//cGMP-dependent protein kinase activity;GO:0005524//ATP binding
CL220.Contig2_All	0.33	4.75	3.847389584	8.31E-22	2.08E-23		K05605//3-hydroxyisobutyryl-CoA hydrolase [EC:3.1.2.4]+ko00410//beta-Alanine metabolism+ko01200//Carbon metabolism+ko00640//Propanoate metabolism+ko00280//Valine, leucine and isoleucine degradation+ko01100//Metabolic pathways;K05605//3-hydroxyisobutyryl-CoA hydrolase [EC:3.1.2.4]+ko00410//beta-Alanine metabolism+ko01200//Carbon metabolism+ko00640//Propanoate metabolism+ko00280//Valine, leucine an…	XM_027353261.1 PREDICTED: Penaeus vannamei 3-hydroxyisobutyryl-CoA hydrolase, mitochondrial-like (LOC113802658), transcript variant X2, mRNA	3-hydroxyisobutyryl-CoA hydrolase, mitochondrial-like isoform X1 [Penaeus vannamei] >XP_027209062.1 3-hydroxyisobutyryl-CoA hydrolase, mitochondrial-like isoform X1 [Penaeus vannamei]	Enoyl-CoA hydratase/isomerase	[I] KOG1684 Enoyl-CoA hydratase	3-hydroxyisobutyryl-CoA hydrolase, mitochondrial OS=Homo sapiens OX=9606 GN=HIBCH PE=1 SV=2	GO:0006574//valine catabolic process;GO:0006574//valine catabolic process;GO:0005739//mitochondrion;GO:0003860//3-hydroxyisobutyryl-CoA hydrolase activity;GO:0005739//mitochondrion
Unigene20870_All	0.17	2.4	3.819427754	4.17E-06	3.56E-07			BX005363.6 Zebrafish DNA sequence from clone CH211-243H4 in linkage group 5, complete sequence
CL2501.Contig4_All	0	0.14	3.807354922	4.50E-06	3.86E-07		K06115//spectrin beta;K06115//spectrin beta;K06115//spectrin beta;K06115//spectrin beta	XM_027352175.1 PREDICTED: Penaeus vannamei spectrin beta chain-like (LOC113801627), transcript variant X1, mRNA	Spectrin beta chain [Armadillidium nasatum]	Spectrin repeat	[Z] KOG0517 Beta-spectrin	Spectrin beta chain OS=Drosophila melanogaster OX=7227 GN=beta-Spec PE=1 SV=2	GO:0005200//structural constituent of cytoskeleton;GO:0003779//actin binding;GO:0005543//phospholipid binding;GO:0051693//actin filament capping;GO:0051693//actin filament capping;GO:0008091//spectrin;GO:0008091//spectrin;GO:0051693//actin filament capping;GO:0008091//spectrin;GO:0051693//actin filament capping
Unigene24698_All	0.2	2.79	3.802193217	4.18E-06	3.56E-07			XM_027354033.1 PREDICTED: Penaeus vannamei G2/mitotic-specific cyclin-B-like (LOC113803283), mRNA
CL122.Contig5_All	0.15	2.09	3.800468536	2.41E-14	9.07E-16		K13702//abhydrolase domain-containing protein 10 [EC:3.1.1.93];K13702//abhydrolase domain-containing protein 10 [EC:3.1.1.93];K13702//abhydrolase domain-containing protein 10 [EC:3.1.1.93];K13702//abhydrolase domain-containing protein 10 [EC:3.1.1.93]	XM_027355700.1 PREDICTED: Penaeus vannamei mycophenolic acid acyl-glucuronide esterase, mitochondrial-like (LOC113804794), transcript variant X7, mRNA	mycophenolic acid acyl-glucuronide esterase, mitochondrial-like isoform X3 [Penaeus vannamei] >XP_027211501.1 mycophenolic acid acyl-glucuronide esterase, mitochondrial-like isoform X3 [Penaeus vannamei]	Serine aminopeptidase, S33		Mycophenolic acid acyl-glucuronide esterase, mitochondrial OS=Pongo abelii OX=9601 GN=ABHD10 PE=2 SV=1
CL515.Contig1_All	0.19	2.63	3.790991476	9.60E-29	1.79E-30	bHLH	K13161//heterogeneous nuclear ribonucleoprotein R;K13161//heterogeneous nuclear ribonucleoprotein R;K13161//heterogeneous nuclear ribonucleoprotein R;K13161//heterogeneous nuclear ribonucleoprotein R	XM_027361774.1 PREDICTED: Penaeus vannamei heterogeneous nuclear ribonucleoprotein R-like (LOC113810089), mRNA	PREDICTED: heterogeneous nuclear ribonucleoprotein Q-like isoform X8 [Hyalella azteca]	RNA recognition motif. (a.k.a. RRM, RBD, or RNP domain)	[A] KOG0117 Heterogeneous nuclear ribonucleoprotein R (RRM superfamily)	Heterogeneous nuclear ribonucleoprotein R OS=Homo sapiens OX=9606 GN=HNRNPR PE=1 SV=1
Unigene9385_All	0.66	9.08	3.782154368	2.22E-11	1.04E-12
CL4179.Contig1_All	1.56	21.46	3.782032142	2.30E-41	2.86E-43			XM_027358637.1 PREDICTED: Penaeus vannamei uncharacterized LOC113807392 (LOC113807392), transcript variant X1, mRNA	uncharacterized protein LOC113807392 isoform X1 [Penaeus vannamei]	WAP-type (Whey Acidic Protein) 'four-disulfide core'			GO:0005576//extracellular region;GO:0030414//peptidase inhibitor activity
Unigene21733_All	0.34	4.66	3.776723303	7.59E-06	6.75E-07			XR_003476630.1 PREDICTED: Penaeus vannamei uncharacterized LOC113815836 (LOC113815836), ncRNA	hypothetical protein C7M84_013172 [Penaeus vannamei]	Domain of unknown function (DUF4728)			GO:0016021//integral component of membrane
Unigene9255_All	1.31	17.59	3.747116766	1.09E-46	1.16E-48		K10955//mucin-2+ko05226//Gastric cancer+ko05146//Amoebiasis;K21125//mucin-5AC+ko04657//IL-17 signaling pathway;K08458//adhesion G-protein coupled receptor F5;K10955//mucin-2+ko05226//Gastric cancer+ko05146//Amoebiasis;K06824//nephronectin	XM_027366660.1 PREDICTED: Penaeus vannamei sarcoplasmic calcium-binding protein, alpha-B and -A chains (LOC113814611), mRNA	sarcoplasmic calcium-binding protein, alpha-B and -A chains [Penaeus vannamei] >ACM89179.1 sarcoplasmic calcium-binding protein [Penaeus vannamei] >ADV17343.1 sarcoplasmic calcium binding protein [Penaeus monodon]	EF hand	[T] LSE0513 C 7-transmembrane receptor	Sarcoplasmic calcium-binding protein, alpha-B and -A chains OS=Penaeus sp. OX=6688 PE=1 SV=1	GO:0005509//calcium ion binding
CL498.Contig1_All	1.74	23.29	3.742551428	1.44E-178	2.74E-181		K06277//Rap guanine nucleotide exchange factor 1+ko04510//Focal adhesion+ko04910//Insulin signaling pathway+ko04722//Neurotrophin signaling pathway+ko05211//Renal cell carcinoma+ko04015//Rap1 signaling pathway	XM_027380835.1 PREDICTED: Penaeus vannamei glutenin, low molecular weight subunit-like (LOC113827891), mRNA	glutenin, low molecular weight subunit-like [Penaeus vannamei]	DAZ associated protein 2 (DAZAP2)	[A] LSE0207 H Protein associated with germ-cell-specific RNA-binding protein DAZ	DAZ-associated protein 2 OS=Rattus norvegicus OX=10116 GN=Dazap2 PE=3 SV=1
CL781.Contig2_All	0.28	3.72	3.731803889	3.85E-06	3.28E-07
CL2506.Contig3_All	0.23	3.02	3.714842783	7.66E-15	2.78E-16		K13216//nuclear inhibitor of protein phosphatase 1 [EC:3.1.4.-];K13216//nuclear inhibitor of protein phosphatase 1 [EC:3.1.4.-];K13216//nuclear inhibitor of protein phosphatase 1 [EC:3.1.4.-];K13216//nuclear inhibitor of protein phosphatase 1 [EC:3.1.4.-];K13216//nuclear inhibitor of protein phosphatase 1 [EC:3.1.4.-]	XM_027367581.1 PREDICTED: Penaeus vannamei nuclear inhibitor of protein phosphatase 1-like (LOC113815519), transcript variant X1, mRNA	nuclear inhibitor of protein phosphatase 1-like isoform X1 [Penaeus vannamei] >ROT68930.1 putative nuclear inhibitor of protein phosphatase 1 [Penaeus vannamei]		[R] KOG1880 Nuclear inhibitor of phosphatase-1	Nuclear inhibitor of protein phosphatase 1 OS=Bos taurus OX=9913 GN=PPP1R8 PE=1 SV=1
CL882.Contig2_All	1.62	21.02	3.697696951	3.01E-98	1.21E-100			XM_027355723.1 PREDICTED: Penaeus vannamei uncharacterized LOC113804814 (LOC113804814), mRNA	uncharacterized protein LOC113804817 [Penaeus vannamei] >ROT77124.1 hypothetical protein C7M84_004286 [Penaeus vannamei]
CL1288.Contig5_All	0.49	6.32	3.689070904	8.86E-22	2.22E-23			XR_003476672.1 PREDICTED: Penaeus vannamei uncharacterized LOC113816019 (LOC113816019), transcript variant X2, misc_RNA	hypothetical protein C7M84_013312 [Penaeus vannamei]	Domain of unknwon function (DUF3824)
CL20.Contig19_All	0.06	0.77	3.68182404	3.86E-06	3.28E-07		K12471//epsin+ko04144//Endocytosis;K12471//epsin+ko04144//Endocytosis;K12471//epsin+ko04144//Endocytosis;K12471//epsin+ko04144//Endocytosis;K12471//epsin+ko04144//Endocytosis	XM_027365646.1 PREDICTED: Penaeus vannamei epsin-2-like (LOC113813622), transcript variant X7, mRNA	epsin-2-like isoform X1 [Penaeus vannamei] >XP_027221442.1 epsin-2-like isoform X1 [Penaeus vannamei] >XP_027221443.1 epsin-2-like isoform X1 [Penaeus vannamei] >XP_027221444.1 epsin-2-like isoform X1 [Penaeus vannamei] >XP_027221445.1 epsin-2-like isoform X1 [Penaeus vannamei] >XP_027221446.1 epsin-2-like isoform X1 [Penaeus vannamei] >XP_027221447.1 epsin-2-like isoform X1 [Penaeus vannamei]		[F] KOG2056 Equilibrative nucleoside transporter protein	Epsin-2 OS=Homo sapiens OX=9606 GN=EPN2 PE=1 SV=3	GO:0030128//clathrin coat of endocytic vesicle;GO:0006897//endocytosis;GO:0030128//clathrin coat of endocytic vesicle;GO:0006897//endocytosis;GO:0030128//clathrin coat of endocytic vesicle
CL932.Contig2_All	0.69	8.77	3.667908576	4.41E-49	4.42E-51		K03927//carboxylesterase 2 [EC:3.1.1.1 3.1.1.84 3.1.1.56]+ko00983//Drug metabolism - other enzymes;K01049//acetylcholinesterase [EC:3.1.1.7]+ko04725//Cholinergic synapse+ko00564//Glycerophospholipid metabolism;K03927//carboxylesterase 2 [EC:3.1.1.1 3.1.1.84 3.1.1.56]+ko00983//Drug metabolism - other enzymes;K03927//carboxylesterase 2 [EC:3.1.1.1 3.1.1.84 3.1.1.56]+ko00983//Drug metabolism - other…	XM_027382397.1 PREDICTED: Penaeus vannamei liver carboxylesterase 2-like (LOC113829277), transcript variant X1, mRNA	liver carboxylesterase 2-like isoform X1 [Penaeus vannamei] >XP_027238199.1 liver carboxylesterase 2-like isoform X1 [Penaeus vannamei] >ROT84189.1 putative esterase E4-like [Penaeus vannamei]	Carboxylesterase family	[R] KOG1516 Carboxylesterase and related proteins	Pyrethroid hydrolase Ces2e OS=Mus musculus OX=10090 GN=Ces2e PE=1 SV=1
CL2837.Contig2_All	0.17	2.12	3.640457613	0.000519111	6.47E-05			XM_027359003.1 PREDICTED: Penaeus vannamei uncharacterized LOC113807686 (LOC113807686), mRNA	uncharacterized protein LOC113807686 [Penaeus vannamei]				GO:0016021//integral component of membrane
CL78.Contig3_All	0.57	6.96	3.610053482	1.53E-33	2.42E-35		K10894//fanconi anemia group G protein+ko03460//Fanconi anemia pathway;K10894//fanconi anemia group G protein+ko03460//Fanconi anemia pathway;K10894//fanconi anemia group G protein+ko03460//Fanconi anemia pathway;K10894//fanconi anemia group G protein+ko03460//Fanconi anemia pathway;K10894//fanconi anemia group G protein+ko03460//Fanconi anemia pathway	XM_027352565.1 PREDICTED: Penaeus vannamei uncharacterized LOC113802101 (LOC113802101), mRNA	putative Fanconi anemia group G protein [Penaeus vannamei]				GO:0036297//interstrand cross-link repair;GO:0036297//interstrand cross-link repair;GO:0036297//interstrand cross-link repair;GO:0043240//Fanconi anaemia nuclear complex;GO:0043240//Fanconi anaemia nuclear complex;GO:0043240//Fanconi anaemia nuclear complex
CL1003.Contig1_All	0.3	3.65	3.604862058	7.98E-05	8.47E-06		K12484//Rab11 family-interacting protein 1/2/5+ko04144//Endocytosis;K11093//U1 small nuclear ribonucleoprotein 70kDa+ko03040//Spliceosome;K12850//pre-mRNA-splicing factor 38B+ko03040//Spliceosome;K22909//zinc finger CCCH domain-containing protein 13;K22909//zinc finger CCCH domain-containing protein 13	XM_027381886.1 PREDICTED: Penaeus vannamei octapeptide-repeat protein T2-like (LOC113828834), transcript variant X14, mRNA	vicilin-like seed storage protein At2g18540 isoform X12 [Penaeus vannamei]		[S] KOG4415 Uncharacterized conserved protein	Histone-lysine N-methyltransferase, H3 lysine-79 specific OS=Dictyostelium discoideum OX=44689 GN=dotA PE=2 SV=2
CL3008.Contig2_All	0.29	3.52	3.601450624	4.46E-05	4.52E-06		K13704//abhydrolase domain-containing protein 12 [EC:3.1.1.23];K13704//abhydrolase domain-containing protein 12 [EC:3.1.1.23];K13704//abhydrolase domain-containing protein 12 [EC:3.1.1.23];K13704//abhydrolase domain-containing protein 12 [EC:3.1.1.23];K13704//abhydrolase domain-containing protein 12 [EC:3.1.1.23]	XM_027363773.1 PREDICTED: Penaeus vannamei monoacylglycerol lipase ABHD12-like (LOC113811919), mRNA	monoacylglycerol lipase ABHD12-like [Penaeus vannamei]	alpha/beta hydrolase fold	[R] KOG1552 Predicted alpha/beta hydrolase	Lysophosphatidylserine lipase ABHD12 OS=Xenopus tropicalis OX=8364 GN=abhd12 PE=2 SV=1	GO:0016021//integral component of membrane;GO:0004622//lysophospholipase activity
CL659.Contig3_All	0.07	0.84	3.584962501	5.63E-13	2.33E-14		K13170//splicing factor, arginine/serine-rich 18;K13170//splicing factor, arginine/serine-rich 18;K15176//RNA polymerase-associated protein CTR9;K13170//splicing factor, arginine/serine-rich 18;K13170//splicing factor, arginine/serine-rich 18	XM_027351711.1 PREDICTED: Penaeus vannamei arginine/serine-rich protein PNISR-like (LOC113800907), transcript variant X2, mRNA	arginine/serine-rich protein PNISR-like isoform X2 [Penaeus vannamei] >XP_027207513.1 arginine/serine-rich protein PNISR-like isoform X2 [Penaeus vannamei]	Arginine/serine-rich protein PNISR	[A] KOG0106 Alternative splicing factor SRp55/B52/SRp75 (RRM superfamily)	Serine/threonine-protein kinase fray2 OS=Dictyostelium discoideum OX=44689 GN=fray2 PE=3 SV=1
Unigene18424_All	0.47	5.52	3.553935605	1.60E-25	3.40E-27		K22016//mucin-3/17;K22022//mucin-21;K10955//mucin-2+ko05226//Gastric cancer+ko05146//Amoebiasis;K22016//mucin-3/17	XM_027365001.1 PREDICTED: Penaeus vannamei uncharacterized LOC113813062 (LOC113813062), mRNA	DNA mismatch repair protein, C-terminal domain-containing protein [Toxoplasma gondii TgCATBr9]		[GO] KOG4157 beta-1,6-N-acetylglucosaminyltransferase, contains WSC domain	Mucin-19 OS=Mus musculus OX=10090 GN=Muc19 PE=2 SV=2	GO:0005524//ATP binding;GO:0016887//ATPase activity;GO:0006298//mismatch repair;GO:0016021//integral component of membrane;GO:0030983//mismatched DNA binding;GO:0032300//mismatch repair complex;GO:0032300//mismatch repair complex;GO:0006298//mismatch repair;GO:0006298//mismatch repair
CL2850.Contig1_All	0.3	3.5	3.544320516	1.53E-09	8.54E-11		K00799//glutathione S-transferase [EC:2.5.1.18]+ko00980//Metabolism of xenobiotics by cytochrome P450+ko00982//Drug metabolism - cytochrome P450+ko00983//Drug metabolism - other enzymes+ko05225//Hepatocellular carcinoma+ko01524//Platinum drug resistance+ko05418//Fluid shear stress and atherosclerosis+ko00480//Glutathione metabolism+ko05200//Pathways in cancer+ko05204//Chemical carcinogenesis;K007…	XM_027375170.1 PREDICTED: Penaeus vannamei microsomal glutathione S-transferase 1-like (LOC113822637), transcript variant X2, mRNA	microsomal glutathione S-transferase 1-like [Penaeus vannamei] >XP_027230971.1 microsomal glutathione S-transferase 1-like [Penaeus vannamei]	MAPEG family	[O] TWOG0269 Microsomal glutathione S-transferase	Microsomal glutathione S-transferase 1 OS=Mus musculus OX=10090 GN=Mgst1 PE=1 SV=3	GO:0016021//integral component of membrane;GO:0016740//transferase activity
Unigene24773_All	0.37	4.29	3.535380472	5.07E-09	2.97E-10			XM_027381501.1 PREDICTED: Penaeus vannamei innexin inx1-like (LOC113828516), mRNA
Unigene21631_All	0.34	3.83	3.493737741	0.000142585	1.58E-05
CL3090.Contig2_All	0.5	5.61	3.488000771	1.16E-06	9.13E-08			CP048846.1 Crassostrea gigas strain QD chromosome 8
CL2040.Contig3_All	0.17	1.87	3.459431619	5.07E-09	2.97E-10		K04681//retinoblastoma-like protein 1+ko04350//TGF-beta signaling pathway+ko04218//Cellular senescence+ko05203//Viral carcinogenesis+ko04110//Cell cycle+ko05165//Human papillomavirus infection;K04681//retinoblastoma-like protein 1+ko04350//TGF-beta signaling pathway+ko04218//Cellular senescence+ko05203//Viral carcinogenesis+ko04110//Cell cycle+ko05165//Human papillomavirus infection;K04681//retin…	XM_027371019.1 PREDICTED: Penaeus vannamei retinoblastoma-like protein 1 (LOC113818827), mRNA	retinoblastoma-like protein 1 [Penaeus vannamei]		[D] KOG1010 Rb (Retinoblastoma tumor suppressor)-related protein	Retinoblastoma-like protein 2 OS=Homo sapiens OX=9606 GN=RBL2 PE=1 SV=3	GO:0005667//transcription regulator complex;GO:0051302//regulation of cell division;GO:0006357//regulation of transcription by RNA polymerase II;GO:0051302//regulation of cell division;GO:0005634//nucleus;GO:0005634//nucleus;GO:0051726//regulation of cell cycle;GO:0051726//regulation of cell cycle;GO:0051726//regulation of cell cycle;GO:0006357//regulation of transcription by RNA polymerase II;GO…
Unigene17453_All	0.24	2.64	3.459431619	0.00014256	1.58E-05
CL834.Contig5_All	0.7	7.68	3.455679484	1.75E-83	8.90E-86		K04984//transient receptor potential cation channel subfamily A member 1+ko04750//Inflammatory mediator regulation of TRP channels;K04984//transient receptor potential cation channel subfamily A member 1+ko04750//Inflammatory mediator regulation of TRP channels;K04984//transient receptor potential cation channel subfamily A member 1+ko04750//Inflammatory mediator regulation of TRP channels;K04984…	XM_027366274.1 PREDICTED: Penaeus vannamei uncharacterized LOC113814241 (LOC113814241), partial mRNA	uncharacterized protein LOC113814241, partial [Penaeus vannamei]	Ankyrin repeats (3 copies)	[M] KOG4177 Ankyrin	Ankyrin-1 OS=Homo sapiens OX=9606 GN=ANK1 PE=1 SV=3	GO:0016021//integral component of membrane;GO:0005216//ion channel activity
CL4002.Contig2_All	0.21	2.29	3.446886365	0.000142536	1.58E-05				putative leupaxin isoform X1 [Penaeus vannamei]				GO:0046872//metal ion binding
CL2345.Contig3_All	0.18	1.96	3.444784843	1.53E-09	8.54E-11		K22016//mucin-3/17;K10955//mucin-2+ko05226//Gastric cancer+ko05146//Amoebiasis;K21125//mucin-5AC+ko04657//IL-17 signaling pathway;K01185//lysozyme [EC:3.2.1.17];K10955//mucin-2+ko05226//Gastric cancer+ko05146//Amoebiasis	XM_027356482.1 PREDICTED: Penaeus vannamei uncharacterized LOC113805478 (LOC113805478), mRNA	mucin-19-like [Octopus vulgaris]		[GO] KOG4157 beta-1,6-N-acetylglucosaminyltransferase, contains WSC domain	Mucin-19 OS=Mus musculus OX=10090 GN=Muc19 PE=2 SV=2	GO:0007594//puparial adhesion;GO:0007594//puparial adhesion;GO:0031012//extracellular matrix;GO:0005201//extracellular matrix structural constituent;GO:0062130//adhesive extracellular matrix
CL797.Contig5_All	1.63	17.7	3.440805491	2.11E-96	8.64E-99		K07913//Ras-related protein Rab-26;K07914//Ras-related protein Rab-37;K07913//Ras-related protein Rab-26;K07913//Ras-related protein Rab-26	XM_027368326.1 PREDICTED: Penaeus vannamei ras-related protein Rab-26-like (LOC113816283), transcript variant X5, mRNA	ras-related protein Rab-26-like isoform X2 [Penaeus vannamei]	Ras family	[R] KOG0083 GTPase Rab26/Rab37, small G protein superfamily	Ras-related protein Rab-37 OS=Mus musculus OX=10090 GN=Rab37 PE=1 SV=2	GO:0003924//GTPase activity;GO:0005525//GTP binding
Unigene21261_All	0.39	4.19	3.425404215	0.000252834	2.95E-05			XM_027369498.1 PREDICTED: Penaeus vannamei carboxy-terminal kinesin 2-like (LOC113817430), mRNA
Unigene13055_All	0.59	6.31	3.418853146	3.08E-24	6.94E-26		K16055//trehalose 6-phosphate synthase/phosphatase [EC:2.4.1.15 3.1.3.12]+ko00500//Starch and sucrose metabolism+ko01100//Metabolic pathways;K16055//trehalose 6-phosphate synthase/phosphatase [EC:2.4.1.15 3.1.3.12]+ko00500//Starch and sucrose metabolism+ko01100//Metabolic pathways;K16055//trehalose 6-phosphate synthase/phosphatase [EC:2.4.1.15 3.1.3.12]+ko00500//Starch and sucrose metabolism+ko01…	XM_027358351.1 PREDICTED: Penaeus vannamei alpha,alpha-trehalose-phosphate synthase [UDP-forming]-like (LOC113807145), mRNA	LOW QUALITY PROTEIN: alpha,alpha-trehalose-phosphate synthase [UDP-forming]-like [Penaeus vannamei]	Trehalose-phosphatase	[G] KOG1050 Trehalose-6-phosphate synthase component TPS1 and related subunits		GO:0003824//catalytic activity;GO:0005992//trehalose biosynthetic process;GO:0005992//trehalose biosynthetic process;GO:0003825//alpha,alpha-trehalose-phosphate synthase (UDP-forming) activity
CL1142.Contig3_All	0.18	1.89	3.392317423	0.000445131	5.49E-05			XM_027372315.1 PREDICTED: Penaeus vannamei uncharacterized LOC113820060 (LOC113820060), mRNA	hypothetical protein C7M84_016516 [Penaeus vannamei]				GO:0003676//nucleic acid binding
Unigene22520_All	0.23	2.41	3.38932738	0.000252792	2.95E-05		K03910//alpha-2-macroglobulin+ko04610//Complement and coagulation cascades;K03910//alpha-2-macroglobulin+ko04610//Complement and coagulation cascades;K03910//alpha-2-macroglobulin+ko04610//Complement and coagulation cascades;K03910//alpha-2-macroglobulin+ko04610//Complement and coagulation cascades;K03910//alpha-2-macroglobulin+ko04610//Complement and coagulation cascades	XM_027375296.1 PREDICTED: Penaeus vannamei alpha-2-macroglobulin-like protein 1 (LOC113822757), mRNA	LOW QUALITY PROTEIN: alpha-2-macroglobulin-like protein 1 [Penaeus vannamei]	A-macroglobulin receptor binding domain	[O] KOG1366 Alpha-macroglobulin	C3 and PZP-like alpha-2-macroglobulin domain-containing protein 8 OS=Homo sapiens OX=9606 GN=CPAMD8 PE=1 SV=2	GO:0005615//extracellular space
CL3136.Contig1_All	0.19	1.97	3.374124306	3.59E-07	2.62E-08			LR597561.1 Myripristis murdjan genome assembly, chromosome: 12
Unigene22663_All	0.25	2.59	3.372952098	3.72E-06	3.15E-07			XM_027383283.1 PREDICTED: Penaeus vannamei uncharacterized LOC113830093 (LOC113830093), mRNA	hypothetical protein C7M84_023312 [Penaeus vannamei]
CL1229.Contig7_All	0.27	2.79	3.36923381	3.79E-23	8.94E-25		K00948//ribose-phosphate pyrophosphokinase [EC:2.7.6.1]+ko00230//Purine metabolism+ko01200//Carbon metabolism+ko01230//Biosynthesis of amino acids+ko00030//Pentose phosphate pathway+ko01100//Metabolic pathways;K00948//ribose-phosphate pyrophosphokinase [EC:2.7.6.1]+ko00230//Purine metabolism+ko01200//Carbon metabolism+ko01230//Biosynthesis of amino acids+ko00030//Pentose phosphate pathway+ko01100…	XM_027377956.1 PREDICTED: Penaeus vannamei phosphoribosyl pyrophosphate synthase-associated protein 2-like (LOC113825157), transcript variant X2, mRNA	PREDICTED: phosphoribosyl pyrophosphate synthase-associated protein 2-like [Hyalella azteca]	Phosphoribosyl synthetase-associated domain	[EF] KOG1503 Phosphoribosylpyrophosphate synthetase-associated protein	Phosphoribosyl pyrophosphate synthase-associated protein 2 OS=Rattus norvegicus OX=10116 GN=Prpsap2 PE=1 SV=1	GO:0009165//nucleotide biosynthetic process;GO:0009165//nucleotide biosynthetic process;GO:0009116//nucleoside metabolic process;GO:0004749//ribose phosphate diphosphokinase activity;GO:0000287//magnesium ion binding;GO:0009116//nucleoside metabolic process
CL1653.Contig2_All	0.55	5.66	3.363298529	6.66E-06	5.84E-07
Unigene10667_All	0.35	3.59	3.358557017	6.66E-06	5.84E-07			LR697120.1 Chanos chanos genome assembly, chromosome: 15
Unigene5329_All	0.93	9.43	3.34195515	1.39E-78	7.65E-81		K05692//actin beta/gamma 1+ko04391//Hippo signaling pathway - fly+ko04390//Hippo signaling pathway+ko05414//Dilated cardiomyopathy (DCM)+ko05416//Viral myocarditis+ko05410//Hypertrophic cardiomyopathy (HCM)+ko05412//Arrhythmogenic right ventricular cardiomyopathy (ARVC)+ko04145//Phagosome+ko05132//Salmonella infection+ko05130//Pathogenic Escherichia coli infection+ko05131//Shigellosis+ko04810//Re…	XM_027383441.1 PREDICTED: Penaeus vannamei actin-like (LOC113830236), mRNA	Actin, cytoplasmic [Penaeus vannamei]	Actin	[Z] KOG0676 Actin and related proteins	Mucin-2 OS=Homo sapiens OX=9606 GN=MUC2 PE=1 SV=2
Unigene19593_All	0.26	2.62	3.332983283	0.000444924	5.49E-05
CL483.Contig3_All	0.5	5	3.321928095	1.71E-07	1.20E-08			XR_003476117.1 PREDICTED: Penaeus vannamei uncharacterized LOC113810233 (LOC113810233), ncRNA
CL3837.Contig2_All	0.14	1.39	3.311586151	0.000938367	0.000124125		K13403//methylenetetrahydrofolate dehydrogenase(NAD+) / 5,10-methenyltetrahydrofolate cyclohydrolase [EC:1.5.1.15 3.5.4.9]+ko00670//One carbon pool by folate+ko01100//Metabolic pathways;K13403//methylenetetrahydrofolate dehydrogenase(NAD+) / 5,10-methenyltetrahydrofolate cyclohydrolase [EC:1.5.1.15 3.5.4.9]+ko00670//One carbon pool by folate+ko01100//Metabolic pathways;K13403//methylenetetrahydro…	XM_027365370.1 PREDICTED: Penaeus vannamei probable bifunctional methylenetetrahydrofolate dehydrogenase/cyclohydrolase 2 (LOC113813400), mRNA	probable bifunctional methylenetetrahydrofolate dehydrogenase/cyclohydrolase 2 [Penaeus vannamei]	Tetrahydrofolate dehydrogenase/cyclohydrolase, catalytic domain	[H] KOG0089 Methylenetetrahydrofolate dehydrogenase/methylenetetrahydrofolate cyclohydrolase	Probable bifunctional methylenetetrahydrofolate dehydrogenase/cyclohydrolase 2 OS=Homo sapiens OX=9606 GN=MTHFD2L PE=1 SV=3
Unigene5886_All	0.39	3.85	3.303312417	4.35E-09	2.54E-10			XM_027357161.1 PREDICTED: Penaeus vannamei proton channel OtopLc-like (LOC113806055), mRNA
CL111.Contig1_All	0.29	2.83	3.286677248	0.000777294	0.000101641			XM_027363397.1 PREDICTED: Penaeus vannamei uncharacterized LOC113811614 (LOC113811614), mRNA	hypothetical protein C7M84_009751 [Penaeus vannamei]
Unigene20498_All	0.36	3.5	3.28128611	0.000777636	0.000101641			XM_027366429.1 PREDICTED: Penaeus vannamei uncharacterized LOC113814380 (LOC113814380), mRNA
CL2544.Contig2_All	0.18	1.73	3.264703226	0.000938231	0.000124125			XM_027366897.1 PREDICTED: Penaeus vannamei uncharacterized LOC113814833 (LOC113814833), mRNA
Unigene16409_All	0.46	4.39	3.254515173	4.89E-12	2.17E-13			XM_027363538.1 PREDICTED: Penaeus vannamei collagen alpha-1(XV) chain-like (LOC113811738), mRNA
Unigene19250_All	0.28	2.66	3.247927513	2.07E-05	1.99E-06		K22037//innexin;K22037//innexin;K22037//innexin;K22037//innexin;K22037//innexin	XM_027362127.1 PREDICTED: Penaeus vannamei innexin inx2-like (LOC113810444), mRNA	innexin inx2-like [Penaeus vannamei]	Innexin	[W] TWOG0193 Innexin-type channels	Innexin inx2 OS=Drosophila melanogaster OX=7227 GN=Inx2 PE=1 SV=1	GO:0016021//integral component of membrane;GO:0005886//plasma membrane;GO:0006811//ion transport;GO:0005921//gap junction
CL961.Contig8_All	0.12	1.12	3.222392421	0.000519191	6.47E-05			XR_003475537.1 PREDICTED: Penaeus vannamei uncharacterized LOC113803657 (LOC113803657), transcript variant X1, ncRNA
CL4179.Contig2_All	5.45	50.46	3.210812071	2.87E-90	1.32E-92			XM_027358638.1 PREDICTED: Penaeus vannamei uncharacterized LOC113807392 (LOC113807392), transcript variant X2, mRNA	antimicrobial peptide type 2 precursor IIb [Penaeus vannamei]				GO:0005576//extracellular region;GO:0030414//peptidase inhibitor activity
CL3527.Contig1_All	0.31	2.87	3.210710616	1.63E-23	3.81E-25		K10478//BTB/POZ domain-containing protein 3/6;K10478//BTB/POZ domain-containing protein 3/6;K10478//BTB/POZ domain-containing protein 3/6;K10478//BTB/POZ domain-containing protein 3/6;K10478//BTB/POZ domain-containing protein 3/6	XM_027382696.1 PREDICTED: Penaeus vannamei BTB/POZ domain-containing protein 6-B-like (LOC113829510), transcript variant X6, mRNA	BTB/POZ domain-containing protein 6-B-like isoform X2 [Penaeus vannamei]	PHR domain	[S] KOG2075 Topoisomerase TOP1-interacting protein BTBD1	BTB/POZ domain-containing protein 3 OS=Mustela putorius furo OX=9669 GN=BTBD3 PE=2 SV=2
Unigene23890_All	0.29	2.65	3.191867554	3.68E-05	3.65E-06		K16727//Rho guanine nucleotide exchange factor 10;K16727//Rho guanine nucleotide exchange factor 10;K16727//Rho guanine nucleotide exchange factor 10;K16727//Rho guanine nucleotide exchange factor 10	XM_027352220.1 PREDICTED: Penaeus vannamei rho guanine nucleotide exchange factor 10-like (LOC113801789), transcript variant X5, mRNA	rho guanine nucleotide exchange factor 10-like isoform X1 [Penaeus vannamei]	RhoGEF domain	[T] KOG3522 Predicted guanine nucleotide exchange factor	Rho guanine nucleotide exchange factor 10-like protein OS=Homo sapiens OX=9606 GN=ARHGEF10L PE=1 SV=4	GO:0005089//Rho guanyl-nucleotide exchange factor activity;GO:0005089//Rho guanyl-nucleotide exchange factor activity
CL378.Contig1_All	0.59	5.34	3.178052882	7.81E-54	6.91E-56		K09173//regulatory factor X 1/2/3;K05287//phosphatidylinositol glycan, class F [EC:2.7.-.-]+ko00563//Glycosylphosphatidylinositol (GPI)-anchor biosynthesis+ko01100//Metabolic pathways	XM_027378735.1 PREDICTED: Penaeus vannamei methyltransferase-like protein 25 (LOC113825890), transcript variant X1, mRNA	methyltransferase-like protein 25 isoform X1 [Penaeus vannamei]	Methyltransferase domain	[A] KOG2651 rRNA adenine N-6-methyltransferase	Methyltransferase-like protein 25 OS=Homo sapiens OX=9606 GN=METTL25 PE=2 SV=2	GO:0008168//methyltransferase activity;GO:0032259//methylation
CL277.Contig5_All	0.16	1.44	3.169925001	2.07E-05	1.99E-06			XR_003477275.1 PREDICTED: Penaeus vannamei uncharacterized LOC113822179 (LOC113822179), ncRNA	hypothetical protein C7M84_001087 [Penaeus vannamei]
CL20.Contig20_All	0.1	0.9	3.169925001	3.59E-07	2.62E-08		K12471//epsin+ko04144//Endocytosis;K12471//epsin+ko04144//Endocytosis;K12471//epsin+ko04144//Endocytosis;K12471//epsin+ko04144//Endocytosis;K12471//epsin+ko04144//Endocytosis	XM_027376415.1 PREDICTED: Penaeus vannamei epsin-2-like (LOC113823725), mRNA	epsin-2-like isoform X1 [Penaeus vannamei] >XP_027221442.1 epsin-2-like isoform X1 [Penaeus vannamei] >XP_027221443.1 epsin-2-like isoform X1 [Penaeus vannamei] >XP_027221444.1 epsin-2-like isoform X1 [Penaeus vannamei] >XP_027221445.1 epsin-2-like isoform X1 [Penaeus vannamei] >XP_027221446.1 epsin-2-like isoform X1 [Penaeus vannamei] >XP_027221447.1 epsin-2-like isoform X1 [Penaeus vannamei]	ENTH domain	[F] KOG2056 Equilibrative nucleoside transporter protein	Epsin-2 OS=Mus musculus OX=10090 GN=Epn2 PE=1 SV=1	GO:0030128//clathrin coat of endocytic vesicle;GO:0006897//endocytosis;GO:0030128//clathrin coat of endocytic vesicle;GO:0006897//endocytosis;GO:0030128//clathrin coat of endocytic vesicle
Unigene17531_All	0.43	3.87	3.169925001	4.38E-08	2.86E-09			XM_027354693.1 PREDICTED: Penaeus vannamei 2-oxoglutarate and iron-dependent oxygenase domain-containing protein 2-like (LOC113803882), mRNA	2-oxoglutarate and iron-dependent oxygenase domain-containing protein 2-like [Penaeus vannamei]		[O] KOG1971 Lysyl hydroxylase	2-oxoglutarate and iron-dependent oxygenase domain-containing protein 2 OS=Danio rerio OX=7955 GN=ogfod2 PE=2 SV=1	GO:0031418//L-ascorbic acid binding;GO:0016705//oxidoreductase activity, acting on paired donors, with incorporation or reduction of molecular oxygen;GO:0005506//iron ion binding
Unigene4415_All	0.64	5.65	3.142107057	1.70E-06	1.36E-07			XR_003476134.1 PREDICTED: Penaeus vannamei uncharacterized LOC113810502 (LOC113810502), ncRNA
CL1406.Contig4_All	0.32	2.82	3.139551352	5.28E-28	1.01E-29		K17569//G patch domain-containing protein 2;K17569//G patch domain-containing protein 2;K17569//G patch domain-containing protein 2;K17569//G patch domain-containing protein 2;K17569//G patch domain-containing protein 2	XM_027373270.1 PREDICTED: Penaeus vannamei G patch domain-containing protein 2-like (LOC113820886), mRNA	G patch domain-containing protein 2-like [Penaeus vannamei]		[R] KOG0154 RNA-binding protein RBM5 and related proteins, contain G-patch and RRM domains		GO:0003676//nucleic acid binding
CL3211.Contig3_All	0.5	4.38	3.13093087	6.41E-05	6.68E-06		K11253//histone H3+ko05322//Systemic lupus erythematosus+ko05034//Alcoholism+ko05202//Transcriptional misregulation in cancer;K11253//histone H3+ko05322//Systemic lupus erythematosus+ko05034//Alcoholism+ko05202//Transcriptional misregulation in cancer;K11253//histone H3+ko05322//Systemic lupus erythematosus+ko05034//Alcoholism+ko05202//Transcriptional misregulation in cancer;K11253//histone H3+ko…	XM_027358694.1 PREDICTED: Penaeus vannamei histone H3 (LOC113807432), mRNA	uncharacterized protein LOC114667611 [Erpetoichthys calabaricus]	Core histone H2A/H2B/H3/H4	[B] KOG1745 Histones H3 and H4	Histone H3 OS=Urechis caupo OX=6431 PE=1 SV=2
Unigene29415_All	0.98	8.58	3.130123993	2.99E-06	2.48E-07			LR738607.1 Sciurus carolinensis genome assembly, chromosome: 17
CL2153.Contig5_All	1.4	12.15	3.117457582	1.46E-76	8.41E-79		K01513//ectonucleotide pyrophosphatase/phosphodiesterase family member 1/3 [EC:3.1.4.1 3.6.1.9]+ko00230//Purine metabolism+ko00770//Pantothenate and CoA biosynthesis+ko00240//Pyrimidine metabolism+ko00760//Nicotinate and nicotinamide metabolism+ko00500//Starch and sucrose metabolism+ko00740//Riboflavin metabolism+ko01100//Metabolic pathways;K01513//ectonucleotide pyrophosphatase/phosphodiesterase…	XM_027358129.1 PREDICTED: Penaeus vannamei venom phosphodiesterase 2-like (LOC113806994), transcript variant X5, mRNA	venom phosphodiesterase 2-like isoform X1 [Penaeus vannamei]	Type I phosphodiesterase / nucleotide pyrophosphatase	[R] KOG2645 Type I phosphodiesterase/nucleotide pyrophosphatase	Venom phosphodiesterase OS=Naja atra OX=8656 PE=1 SV=1	GO:0016787//hydrolase activity;GO:0046872//metal ion binding;GO:0003676//nucleic acid binding
CL414.Contig4_All	0.14	1.21	3.111508315	1.71E-07	1.20E-08		K12811//ATP-dependent RNA helicase DDX46/PRP5 [EC:3.6.4.13]+ko03040//Spliceosome;K13171//serine/arginine repetitive matrix protein 1+ko03013//RNA transport+ko03015//mRNA surveillance pathway;K17498//transcription factor SPN1;K17498//transcription factor SPN1;K12893//splicing factor, arginine/serine-rich 4/5/6+ko03040//Spliceosome+ko05168//Herpes simplex infection	XM_027878659.1 PREDICTED: Empidonax traillii arginine and serine rich coiled-coil 2 (RSRC2), transcript variant X3, mRNA	Arginine/serine-rich coiled-coil protein 2 [Armadillidium nasatum]	Small acidic protein family	[A] KOG0119 Splicing factor 1/branch point binding protein (RRM superfamily)	Arginine/serine-rich coiled-coil protein 2 OS=Rattus norvegicus OX=10116 GN=Rsrc2 PE=2 SV=1
Unigene21705_All	0.28	2.39	3.093511886	0.000112012	1.22E-05
CL2707.Contig2_All	0.65	5.53	3.088767857	2.99E-06	2.48E-07	HMG	K18626//trichohyalin;K18626//trichohyalin;K13165//splicing factor, arginine/serine-rich 12		unnamed protein product [Schistocephalus solidus]		[W] LSE0516 C Uncharacterized protein, contains major sperm protein (MSP) domain	Glutamic acid-rich protein OS=Plasmodium falciparum (isolate FC27 / Papua New Guinea) OX=5837 GN=GARP PE=4 SV=1	GO:0016021//integral component of membrane
CL133.Contig8_All	0.52	4.41	3.084195127	5.86E-17	1.89E-18	zf-C2H2	K17902//TBC1 domain family member 4+ko04919//Thyroid hormone signaling pathway+ko04931//Insulin resistance;K17902//TBC1 domain family member 4+ko04919//Thyroid hormone signaling pathway+ko04931//Insulin resistance;K17902//TBC1 domain family member 4+ko04919//Thyroid hormone signaling pathway+ko04931//Insulin resistance;K17902//TBC1 domain family member 4+ko04919//Thyroid hormone signaling pathway…	XM_027368641.1 PREDICTED: Penaeus vannamei TBC1 domain family member 1-like (LOC113816599), transcript variant X3, mRNA	TBC1 domain family member 1-like isoform X2 [Penaeus vannamei]	Rab-GTPase-TBC domain	[R] KOG1102 Rab6 GTPase activator GAPCenA and related TBC domain proteins	TBC1 domain family member 1 OS=Homo sapiens OX=9606 GN=TBC1D1 PE=1 SV=2
CL4087.Contig1_All	0.17	1.44	3.08246216	0.000777408	0.000101641	TF_bZIP	K09382//paired box protein 1/9;K09382//paired box protein 1/9;K09366//POU domain transcription factor, class 4;K09382//paired box protein 1/9	AP022690.1 Epinephelus fuscoguttatus DNA, LG16, complete sequence	hypothetical protein DICPUDRAFT_146516 [Dictyostelium purpureum] >EGC40544.1 hypothetical protein DICPUDRAFT_146516 [Dictyostelium purpureum]	N-terminal domain of cytochrome oxidase-cbb3, FixP		Uncharacterized histidine-rich protein DDB_G0274557 OS=Dictyostelium discoideum OX=44689 GN=DDB_G0274557 PE=3 SV=1	GO:0016500//protein-hormone receptor activity;GO:0004930//G protein-coupled receptor activity;GO:0016021//integral component of membrane
Unigene18597_All	0.45	3.79	3.074200942	6.15E-09	3.67E-10			XM_027359519.1 PREDICTED: Penaeus vannamei uncharacterized LOC113808183 (LOC113808183), mRNA
CL1463.Contig6_All	1.12	9.41	3.070695991	1.71E-07	1.20E-08			LR633956.1 Gadus morhua genome assembly, chromosome: 14		Kazal-type serine protease inhibitor domain		Ovomucoid OS=Dromaius novaehollandiae OX=8790 PE=1 SV=3
Unigene25840_All	0.38	3.19	3.0694851	3.72E-06	3.15E-07			XM_027369722.1 PREDICTED: Penaeus vannamei chymotrypsin A-like (LOC113817651), transcript variant X4, mRNA	chymotrypsin A-like isoform X2 [Penaeus vannamei] >XP_027225523.1 chymotrypsin A-like isoform X2 [Penaeus vannamei]				GO:0004252//serine-type endopeptidase activity
Unigene17318_All	0.27	2.26	3.06529146	6.41E-05	6.68E-06		K00326//cytochrome-b5 reductase [EC:1.6.2.2]+ko00520//Amino sugar and nucleotide sugar metabolism;K00326//cytochrome-b5 reductase [EC:1.6.2.2]+ko00520//Amino sugar and nucleotide sugar metabolism;K00326//cytochrome-b5 reductase [EC:1.6.2.2]+ko00520//Amino sugar and nucleotide sugar metabolism;K00326//cytochrome-b5 reductase [EC:1.6.2.2]+ko00520//Amino sugar and nucleotide sugar metabolism	XM_027375434.1 PREDICTED: Penaeus vannamei cytochrome b5 reductase 4-like (LOC113822903), transcript variant X3, mRNA	cytochrome b5 reductase 4-like isoform X3 [Penaeus vannamei]	Cytochrome b5-like Heme/Steroid binding domain	[C] KOG0536 Flavohemoprotein b5+b5R	Cytochrome b5 reductase 4 OS=Bos taurus OX=9913 GN=CYB5R4 PE=2 SV=1
CL4142.Contig1_All	0.9	7.53	3.064652958	5.23E-06	4.51E-07
CL3286.Contig1_All	0.28	2.29	3.031848866	2.99E-06	2.48E-07		K19326//nesprin-1;K19326//nesprin-1;K19326//nesprin-1;K19326//nesprin-1;K19326//nesprin-1	XM_027354376.1 PREDICTED: Penaeus vannamei titin-like (LOC113803567), transcript variant X3, mRNA	titin-like isoform X2 [Penaeus vannamei]	Spectrin repeat	[D] KOG0964 Structural maintenance of chromosome protein 3 (sister chromatid cohesion complex Cohesin, subunit SMC3)	Nesprin-1 OS=Mus musculus OX=10090 GN=Syne1 PE=1 SV=2	GO:0016021//integral component of membrane
CL592.Contig2_All	0.59	4.81	3.027250034	8.19E-30	1.47E-31		K08430//G protein-coupled receptor 142;K08430//G protein-coupled receptor 142;K08430//G protein-coupled receptor 142;K13172//serine/arginine repetitive matrix protein 2;K13172//serine/arginine repetitive matrix protein 2	XM_027369744.1 PREDICTED: Penaeus vannamei probable G-protein coupled receptor B0563.6 (LOC113817667), transcript variant X7, mRNA	probable G-protein coupled receptor B0563.6 isoform X1 [Penaeus vannamei] >XP_027225539.1 probable G-protein coupled receptor B0563.6 isoform X1 [Penaeus vannamei] >XP_027225540.1 probable G-protein coupled receptor B0563.6 isoform X1 [Penaeus vannamei] >XP_027225541.1 probable G-protein coupled receptor B0563.6 isoform X1 [Penaeus vannamei]	7 transmembrane receptor (rhodopsin family)	[R] KOG3656 FOG: 7 transmembrane receptor	Probable G-protein coupled receptor B0563.6 OS=Caenorhabditis elegans OX=6239 GN=B0563.6 PE=3 SV=2	GO:0004930//G protein-coupled receptor activity;GO:0016021//integral component of membrane
CL1442.Contig6_All	0.27	2.18	3.013296823	7.18E-25	1.58E-26		K11643//chromodomain-helicase-DNA-binding protein 4 [EC:3.6.4.12]+ko05203//Viral carcinogenesis+ko05165//Human papillomavirus infection;K11643//chromodomain-helicase-DNA-binding protein 4 [EC:3.6.4.12]+ko05203//Viral carcinogenesis+ko05165//Human papillomavirus infection;K11643//chromodomain-helicase-DNA-binding protein 4 [EC:3.6.4.12]+ko05203//Viral carcinogenesis+ko05165//Human papillomavirus i…	XR_003477384.1 PREDICTED: Penaeus vannamei chromodomain-helicase-DNA-binding protein Mi-2 homolog (LOC113823341), misc_RNA	LOW QUALITY PROTEIN: chromodomain-helicase-DNA-binding protein Mi-2 homolog [Penaeus vannamei]	SNF2 family N-terminal domain	[R] KOG0383 Predicted helicase	Chromodomain-helicase-DNA-binding protein Mi-2 homolog OS=Drosophila melanogaster OX=7227 GN=Mi-2 PE=1 SV=2
Unigene21726_All	0.4	3.22	3.008988783	0.000193889	2.21E-05			LR792561.1 Pseudochaenichthys georgianus genome assembly, chromosome: 16
CL238.Contig4_All	0.23	1.85	3.007819504	0.000333945	4.01E-05		K14753//guanine nucleotide-binding protein subunit beta-2-like 1 protein+ko05162//Measles;K14753//guanine nucleotide-binding protein subunit beta-2-like 1 protein+ko05162//Measles;K14753//guanine nucleotide-binding protein subunit beta-2-like 1 protein+ko05162//Measles;K14753//guanine nucleotide-binding protein subunit beta-2-like 1 protein+ko05162//Measles	XM_027376960.1 PREDICTED: Penaeus vannamei receptor of activated protein C kinase 1-like (LOC113824223), transcript variant X1, mRNA	receptor of activated protein C kinase 1-like [Penaeus vannamei] >XP_027232762.1 receptor of activated protein C kinase 1-like [Penaeus vannamei] >ABU49887.1 receptor for activated protein kinase c1 [Penaeus monodon] >AHF21001.1 activated C kinase 1 receptor [Penaeus japonicus] >ROT62986.1 receptor for activated protein kinase c1 [Penaeus vannamei]	WD domain, G-beta repeat	[T] KOG0279 G protein beta subunit-like protein	Guanine nucleotide-binding protein subunit beta-like protein OS=Drosophila melanogaster OX=7227 GN=Rack1 PE=1 SV=2	GO:0016301//kinase activity
CL20.Contig11_All	0.08	0.63	2.977279923	0.000445062	5.49E-05		K12471//epsin+ko04144//Endocytosis;K12471//epsin+ko04144//Endocytosis;K12471//epsin+ko04144//Endocytosis;K12471//epsin+ko04144//Endocytosis;K12471//epsin+ko04144//Endocytosis	XM_027365646.1 PREDICTED: Penaeus vannamei epsin-2-like (LOC113813622), transcript variant X7, mRNA	epsin-2-like isoform X1 [Penaeus vannamei] >XP_027221442.1 epsin-2-like isoform X1 [Penaeus vannamei] >XP_027221443.1 epsin-2-like isoform X1 [Penaeus vannamei] >XP_027221444.1 epsin-2-like isoform X1 [Penaeus vannamei] >XP_027221445.1 epsin-2-like isoform X1 [Penaeus vannamei] >XP_027221446.1 epsin-2-like isoform X1 [Penaeus vannamei] >XP_027221447.1 epsin-2-like isoform X1 [Penaeus vannamei]		[F] KOG2056 Equilibrative nucleoside transporter protein	Epsin-2 OS=Homo sapiens OX=9606 GN=EPN2 PE=1 SV=3	GO:0030128//clathrin coat of endocytic vesicle;GO:0006897//endocytosis;GO:0030128//clathrin coat of endocytic vesicle;GO:0030128//clathrin coat of endocytic vesicle;GO:0006897//endocytosis
CL2051.Contig2_All	0.14	1.09	2.960829403	7.00E-12	3.15E-13			XM_027367662.1 PREDICTED: Penaeus vannamei vacuolar protein sorting-associated protein 13-like (LOC113815638), mRNA
CL1406.Contig12_All	0.13	1.01	2.957771765	0.000444993	5.49E-05		K17569//G patch domain-containing protein 2;K17569//G patch domain-containing protein 2;K17569//G patch domain-containing protein 2;K17569//G patch domain-containing protein 2;K17569//G patch domain-containing protein 2	XM_027373270.1 PREDICTED: Penaeus vannamei G patch domain-containing protein 2-like (LOC113820886), mRNA	G patch domain-containing protein 2-like [Penaeus vannamei]		[R] KOG0154 RNA-binding protein RBM5 and related proteins, contain G-patch and RRM domains	G patch domain-containing protein 2 OS=Homo sapiens OX=9606 GN=GPATCH2 PE=1 SV=1	GO:0003676//nucleic acid binding
CL3092.Contig2_All	0.65	5.01	2.94629898	4.93E-18	1.48E-19		K01047//secretory phospholipase A2 [EC:3.1.1.4]+ko00590//Arachidonic acid metabolism+ko04975//Fat digestion and absorption+ko04972//Pancreatic secretion+ko00564//Glycerophospholipid metabolism+ko00565//Ether lipid metabolism+ko04270//Vascular smooth muscle contraction+ko04014//Ras signaling pathway+ko00592//alpha-Linolenic acid metabolism+ko00591//Linoleic acid metabolism+ko01100//Metabolic pathw…	XM_027373228.1 PREDICTED: Penaeus vannamei group 3 secretory phospholipase A2-like (LOC113820851), mRNA	hypothetical protein C7M84_017060 [Penaeus vannamei]	Phospholipase A2		Phospholipase A2 phaiodactylipin OS=Anuroctonus phaiodactylus OX=246982 PE=1 SV=2	GO:0005576//extracellular region;GO:0006644//phospholipid metabolic process;GO:0004623//phospholipase A2 activity;GO:0006644//phospholipid metabolic process;GO:0102568//phospholipase A2 activity consuming 1,2-dioleoylphosphatidylethanolamine);GO:0050482//arachidonic acid secretion;GO:0102567//phospholipase A2 activity (consuming 1,2-dipalmitoylphosphatidylcholine)
CL1147.Contig4_All	1.06	8.15	2.942735795	9.49E-22	2.38E-23		K18624//macrophage erythroblast attacher;K18624//macrophage erythroblast attacher	XM_027363256.1 PREDICTED: Penaeus vannamei glucose-induced degradation protein 8 homolog (LOC113811494), transcript variant X2, mRNA	glucose-induced degradation protein 8 homolog [Penaeus vannamei] >XP_027219057.1 glucose-induced degradation protein 8 homolog [Penaeus vannamei] >XP_027219058.1 glucose-induced degradation protein 8 homolog [Penaeus vannamei]	CTLH/CRA C-terminal to LisH motif domain	[Z] KOG2659 LisH motif-containing protein	Glucose-induced degradation protein 8 homolog OS=Homo sapiens OX=9606 GN=GID8 PE=1 SV=1
CL1101.Contig9_All	1.91	14.53	2.92739016	9.27E-155	2.13E-157		K01769//guanylate cyclase, other [EC:4.6.1.2]+ko00230//Purine metabolism;K01769//guanylate cyclase, other [EC:4.6.1.2]+ko00230//Purine metabolism;K01769//guanylate cyclase, other [EC:4.6.1.2]+ko00230//Purine metabolism;K01769//guanylate cyclase, other [EC:4.6.1.2]+ko00230//Purine metabolism;K01769//guanylate cyclase, other [EC:4.6.1.2]+ko00230//Purine metabolism	XM_027371820.1 PREDICTED: Penaeus vannamei receptor-type guanylate cyclase Gyc76C-like (LOC113819611), mRNA	LOW QUALITY PROTEIN: receptor-type guanylate cyclase Gyc76C-like [Penaeus vannamei]	Adenylate and Guanylate cyclase catalytic domain	[T] KOG1023 Natriuretic peptide receptor, guanylate cyclase	Atrial natriuretic peptide receptor 1 OS=Mus musculus OX=10090 GN=Npr1 PE=1 SV=2	GO:0005524//ATP binding;GO:0035556//intracellular signal transduction;GO:0004383//guanylate cyclase activity;GO:0016021//integral component of membrane;GO:0035556//intracellular signal transduction;GO:0035556//intracellular signal transduction;GO:0035556//intracellular signal transduction;GO:0035556//intracellular signal transduction;GO:0004672//protein kinase activity
CL1874.Contig2_All	0.26	1.96	2.914270126	6.15E-09	3.67E-10		K13172//serine/arginine repetitive matrix protein 2;K13172//serine/arginine repetitive matrix protein 2;K13172//serine/arginine repetitive matrix protein 2;K13172//serine/arginine repetitive matrix protein 2;K13172//serine/arginine repetitive matrix protein 2	JF828311.1 Penaeus monodon hypothetical protein (U1011) mRNA, partial cds	hypothetical protein C7M84_021292 [Penaeus vannamei]	BRE1 E3 ubiquitin ligase	[K] LSE0096 H SON DNA-binding protein/negative regulatory element-binding protein	Serine/arginine repetitive matrix protein 2 OS=Mus musculus OX=10090 GN=Srrm2 PE=1 SV=3
CL3150.Contig2_All	0.21	1.58	2.911463325	0.000193857	2.21E-05
CL2737.Contig3_All	0.34	2.55	2.906890596	0.000571355	7.24E-05	zf-C2H2	K15590//transcription factor EB+ko04137//Mitophagy - animal;K04739//cAMP-dependent protein kinase regulator+ko04910//Insulin signaling pathway;K17455//fascin 1/2;K16351//netrin-G2 ligand+ko04360//Axon guidance+ko04514//Cell adhesion molecules (CAMs);K06842//semaphorin 6+ko04360//Axon guidance	BX942836.11 Zebrafish DNA sequence from clone CH211-61G16 in linkage group 5, complete sequence	hypothetical protein EYF80_040305 [Liparis tanakae]	Lipocalin-like domain	[R] KOG0118 FOG: RRM domain	GATA zinc finger domain-containing protein 14 OS=Dictyostelium discoideum OX=44689 GN=gtaN PE=4 SV=1	GO:0005524//ATP binding;GO:0016021//integral component of membrane;GO:0055085//transmembrane transport;GO:0042626//ATPase-coupled transmembrane transporter activity;GO:0055085//transmembrane transport
CL1816.Contig1_All	0.55	4.11	2.90163487	4.02E-21	1.03E-22		K05619//transglutaminase 1 [EC:2.3.2.13];K05619//transglutaminase 1 [EC:2.3.2.13];K05619//transglutaminase 1 [EC:2.3.2.13];K05619//transglutaminase 1 [EC:2.3.2.13];K05619//transglutaminase 1 [EC:2.3.2.13]	XM_027379114.1 PREDICTED: Penaeus vannamei hemocyte protein-glutamine gamma-glutamyltransferase-like (LOC113826241), mRNA	putative hemocyte protein-glutamine gamma-glutamyltransferase [Penaeus vannamei]	Transglutaminase family, C-terminal ig like domain	[V] TWOG0528 Blood coagulation factor XIIIa/Transglutaminase	Hemocyte protein-glutamine gamma-glutamyltransferase OS=Tachypleus tridentatus OX=6853 PE=1 SV=1	GO:0046872//metal ion binding;GO:0018149//peptide cross-linking;GO:0003810//protein-glutamine gamma-glutamyltransferase activity;GO:0018149//peptide cross-linking
CL2730.Contig2_All	0.47	3.5	2.89662226	0.000571182	7.24E-05
Unigene24615_All	0.9	6.7	2.896164189	0.000571269	7.24E-05			AF360032.1 Penaeus (Litopenaeus) vannamei microsatellite TUMXLv6.31 sequence
CL3584.Contig1_All	1.04	7.74	2.895750038	7.34E-07	5.61E-08			XM_027351309.1 PREDICTED: Penaeus vannamei uncharacterized LOC113800526 (LOC113800526), transcript variant X5, mRNA	uncharacterized protein LOC113810844 isoform X1 [Penaeus vannamei] >XP_027218292.1 uncharacterized protein LOC113810844 isoform X2 [Penaeus vannamei] >XP_027218293.1 uncharacterized protein LOC113810844 isoform X2 [Penaeus vannamei]
CL2210.Contig2_All	0.23	1.71	2.894290559	0.00077718	0.000101641				unnamed protein product [Protopolystoma xenopodis]
CL601.Contig3_All	0.19	1.41	2.891623839	7.42E-13	3.09E-14		K05096//FMS-like tyrosine kinase 1 [EC:2.7.10.1]+ko04510//Focal adhesion+ko05323//Rheumatoid arthritis+ko05202//Transcriptional misregulation in cancer+ko04151//PI3K-Akt signaling pathway+ko04010//MAPK signaling pathway+ko04014//Ras signaling pathway+ko04015//Rap1 signaling pathway+ko04066//HIF-1 signaling pathway;K05096//FMS-like tyrosine kinase 1 [EC:2.7.10.1]+ko04510//Focal adhesion+ko05323//R…	XM_027351569.1 PREDICTED: Penaeus vannamei platelet-derived growth factor receptor alpha-like (LOC113800792), transcript variant X1, mRNA	putative vascular endothelial growth factor receptor 1-like isoform X1 [Penaeus vannamei]	Protein tyrosine and serine/threonine kinase	[T] KOG0200 Fibroblast/platelet-derived growth factor receptor and related receptor tyrosine kinases	Vascular endothelial growth factor receptor 2 OS=Coturnix japonica OX=93934 GN=KDR PE=1 SV=1	GO:0016021//integral component of membrane;GO:0004713//protein tyrosine kinase activity;GO:0005524//ATP binding
CL1255.Contig8_All	0.8	5.92	2.887525271	1.97E-16	6.53E-18			XM_027359393.1 PREDICTED: Penaeus vannamei uncharacterized LOC113808074 (LOC113808074), mRNA	uncharacterized protein LOC113808074 [Penaeus vannamei]	Pardaxin
CL3315.Contig2_All	0.36	2.66	2.885357434	0.000571096	7.24E-05		K07432//beta-1,4-N-acetylglucosaminyltransferase [EC:2.4.1.141]+ko00510//N-Glycan biosynthesis+ko01100//Metabolic pathways	XM_027360010.1 PREDICTED: Penaeus vannamei nucleolar protein 58-like (LOC113808575), mRNA	putative UPF0547 protein C16orf87-like isoform X1 [Penaeus vannamei]	Uncharacterised protein family UPF0547
Unigene24427_All	0.3	2.18	2.861293729	2.72E-05	2.66E-06			XM_027354625.1 PREDICTED: Penaeus vannamei methylmalonic aciduria and homocystinuria type D protein, mitochondrial-like (LOC113803801), transcript variant X1, mRNA	hypothetical protein C7M84_003427 [Penaeus vannamei]	Methylmalonic aciduria and homocystinuria type D protein			GO:0009235//cobalamin metabolic process;GO:0009235//cobalamin metabolic process
Unigene17415_All	0.94	6.77	2.848423172	9.52E-13	4.02E-14				hypothetical protein C7M84_009655 [Penaeus vannamei]				GO:0016021//integral component of membrane
Unigene15413_All	0.36	2.59	2.846883286	0.000980388	0.000129984			XM_027356849.1 PREDICTED: Penaeus vannamei methanethiol oxidase-like (LOC113805787), mRNA	golgin subfamily A member 6-like protein 2 [Penaeus vannamei]	Plant protein of unknown function (DUF641)			GO:0016021//integral component of membrane
CL3692.Contig1_All	0.45	3.2	2.830074999	3.40E-09	1.97E-10		K17751//myosin heavy chain 6/7+ko05416//Viral myocarditis+ko04261//Adrenergic signaling in cardiomyocytes+ko04260//Cardiac muscle contraction;K17751//myosin heavy chain 6/7+ko05416//Viral myocarditis+ko04261//Adrenergic signaling in cardiomyocytes+ko04260//Cardiac muscle contraction;K10352//myosin heavy chain+ko04530//Tight junction;K17751//myosin heavy chain 6/7+ko05416//Viral myocarditis+ko0426…	XR_003477590.1 PREDICTED: Penaeus vannamei myosin heavy chain, muscle-like (LOC113825418), misc_RNA	myosin heavy chain, muscle-like isoform X1 [Penaeus vannamei] >XP_027234047.1 myosin heavy chain, muscle-like isoform X2 [Penaeus vannamei]	Myosin tail	[Z] KOG0161 Myosin class II heavy chain	Myosin heavy chain, muscle OS=Drosophila melanogaster OX=7227 GN=Mhc PE=1 SV=4	GO:0016459//myosin complex;GO:0016459//myosin complex;GO:0005524//ATP binding;GO:0003774//motor activity;GO:0016459//myosin complex
Unigene18108_All	1.17	8.3	2.826602807	5.32E-07	4.00E-08
CL577.Contig5_All	0.24	1.67	2.798741792	2.19E-20	5.86E-22		K05668//ATP-binding cassette, subfamily C (CFTR/MRP), member 5+ko01523//Antifolate resistance+ko02010//ABC transporters;K05668//ATP-binding cassette, subfamily C (CFTR/MRP), member 5+ko01523//Antifolate resistance+ko02010//ABC transporters;K05668//ATP-binding cassette, subfamily C (CFTR/MRP), member 5+ko01523//Antifolate resistance+ko02010//ABC transporters	XM_027378859.1 PREDICTED: Penaeus vannamei multidrug resistance-associated protein 5-like (LOC113825996), transcript variant X2, mRNA	multidrug resistance-associated protein 5-like isoform X2 [Penaeus vannamei]	ABC transporter	[Q] KOG0054 Multidrug resistance-associated protein/mitoxantrone resistance protein, ABC superfamily	Multidrug resistance-associated protein 5 OS=Homo sapiens OX=9606 GN=ABCC5 PE=1 SV=2	GO:0016021//integral component of membrane;GO:0016887//ATPase activity;GO:0005524//ATP binding;GO:0042626//ATPase-coupled transmembrane transporter activity
CL664.Contig3_All	0.36	2.5	2.795859283	6.68E-21	1.74E-22		K18437//high affinity cAMP-specific and IBMX-insensitive 3',5'-cyclic phosphodiesterase 8 [EC:3.1.4.53]+ko00230//Purine metabolism+ko05032//Morphine addiction+ko04934//Cushing syndrome+ko04927//Cortisol synthesis and secretion;K18437//high affinity cAMP-specific and IBMX-insensitive 3',5'-cyclic phosphodiesterase 8 [EC:3.1.4.53]+ko00230//Purine metabolism+ko05032//Morphine addiction+ko04934//Cush…	XM_027360121.1 PREDICTED: Penaeus vannamei high affinity cAMP-specific and IBMX-insensitive 3',5'-cyclic phosphodiesterase 8B-like (LOC113808654), transcript variant X5, mRNA	high affinity cAMP-specific and IBMX-insensitive 3',5'-cyclic phosphodiesterase 8A-like isoform X4 [Penaeus vannamei]	3'5'-cyclic nucleotide phosphodiesterase	[T] KOG1229 3'5'-cyclic nucleotide phosphodiesterases	High affinity cAMP-specific and IBMX-insensitive 3',5'-cyclic phosphodiesterase 8 OS=Drosophila melanogaster OX=7227 GN=Pde8 PE=2 SV=1
CL629.Contig1_All	0.42	2.9	2.787591667	0.000193824	2.21E-05
Unigene497_All	1.31	9.02	2.783560622	6.41E-11	3.13E-12
CL1779.Contig3_All	0.49	3.37	2.781894937	3.67E-22	9.04E-24		K15306//Ran-binding protein 1+ko05203//Viral carcinogenesis+ko05166//Human T-cell leukemia virus 1 infection;K15306//Ran-binding protein 1+ko05203//Viral carcinogenesis+ko05166//Human T-cell leukemia virus 1 infection;K15306//Ran-binding protein 1+ko05203//Viral carcinogenesis+ko05166//Human T-cell leukemia virus 1 infection;K15306//Ran-binding protein 1+ko05203//Viral carcinogenesis+ko05166//Hum…	XM_027375493.1 PREDICTED: Penaeus vannamei ran-specific GTPase-activating protein-like (LOC113822946), mRNA	ran-specific GTPase-activating protein-like [Penaeus vannamei]	RanBP1 domain	[U] KOG0864 Ran-binding protein RANBP1 and related RanBD domain proteins	Ran-specific GTPase-activating protein OS=Mus musculus OX=10090 GN=Ranbp1 PE=1 SV=2	GO:0046907//intracellular transport;GO:0046907//intracellular transport
CL1539.Contig2_All	0.77	5.28	2.777607579	0.00077775	0.000101641			XM_027375649.1 PREDICTED: Penaeus vannamei uncharacterized LOC113823051 (LOC113823051), partial mRNA	uncharacterized protein LOC113823051, partial [Penaeus vannamei]
CL2892.Contig1_All	0.2	1.37	2.776103988	1.28E-06	1.01E-07		K14398//cleavage and polyadenylation specificity factor subunit 6/7+ko03015//mRNA surveillance pathway;K14398//cleavage and polyadenylation specificity factor subunit 6/7+ko03015//mRNA surveillance pathway;K14398//cleavage and polyadenylation specificity factor subunit 6/7+ko03015//mRNA surveillance pathway;K14398//cleavage and polyadenylation specificity factor subunit 6/7+ko03015//mRNA surveill…	XM_027377735.1 PREDICTED: Penaeus vannamei cleavage and polyadenylation specificity factor subunit CG7185-like (LOC113824963), transcript variant X1, mRNA	cleavage and polyadenylation specificity factor subunit CG7185-like isoform X1 [Penaeus vannamei]		[A] KOG4849 mRNA cleavage factor I subunit/CPSF subunit	Cleavage and polyadenylation specificity factor subunit CG7185 OS=Drosophila melanogaster OX=7227 GN=CG7185 PE=1 SV=2	GO:0003723//RNA binding
CL731.Contig3_All	0.33	2.26	2.775784843	2.72E-05	2.66E-06			XM_027369946.1 PREDICTED: Penaeus vannamei ERI1 exoribonuclease 3-like (LOC113817842), mRNA	putative ERI1 exoribonuclease 3 isoform X7 [Penaeus vannamei]				GO:0003676//nucleic acid binding
Unigene1974_All	1.99	13.6	2.772766316	5.07E-39	6.76E-41		K05738//myosin light chain 1;K12750//myosin light chain 4+ko04261//Adrenergic signaling in cardiomyocytes+ko04260//Cardiac muscle contraction+ko04371//Apelin signaling pathway;K12750//myosin light chain 4+ko04261//Adrenergic signaling in cardiomyocytes+ko04260//Cardiac muscle contraction+ko04371//Apelin signaling pathway;K12750//myosin light chain 4+ko04261//Adrenergic signaling in cardiomyocytes…	XM_027375218.1 PREDICTED: Penaeus vannamei myosin light chain alkali-like (LOC113822686), transcript variant X4, mRNA	myosin light chain alkali-like isoform X4 [Penaeus vannamei] >XP_027231020.1 myosin light chain alkali-like isoform X5 [Penaeus vannamei] >ADD70028.1 myosin light chain [Penaeus japonicus]	EF-hand domain	[Z] KOG0030 Myosin essential light chain, EF-Hand protein superfamily	Myosin light chain alkali OS=Drosophila simulans OX=7240 GN=Mlc1 PE=4 SV=3	GO:0005509//calcium ion binding
Unigene1711_All	0.94	6.42	2.771840635	0.000137599	1.53E-05			XM_027370114.1 PREDICTED: Penaeus vannamei superoxide dismutase [Cu-Zn]-like (LOC113817999), mRNA
CL1503.Contig3_All	0.75	5.09	2.762703156	6.05E-17	1.95E-18		K13172//serine/arginine repetitive matrix protein 2;K13171//serine/arginine repetitive matrix protein 1+ko03013//RNA transport+ko03015//mRNA surveillance pathway;K10955//mucin-2+ko05226//Gastric cancer+ko05146//Amoebiasis;K13171//serine/arginine repetitive matrix protein 1+ko03013//RNA transport+ko03015//mRNA surveillance pathway;K19475//WAS/WASL-interacting protein+ko04144//Endocytosis	XM_027363318.1 PREDICTED: Penaeus vannamei uncharacterized LOC113811550 (LOC113811550), transcript variant X2, mRNA	hypothetical protein C7M84_009715 [Penaeus vannamei]		[T] KOG1187 Serine/threonine protein kinase	Serine/arginine repetitive matrix protein 1 OS=Mus musculus OX=10090 GN=Srrm1 PE=1 SV=2
CL1571.Contig3_All	0.28	1.89	2.754887502	1.95E-09	1.11E-10			XM_027356000.1 PREDICTED: Penaeus vannamei UDP-N-acetylglucosamine transporter-like (LOC113805090), transcript variant X1, mRNA
Unigene10742_All	0.46	3.1	2.752562449	2.18E-07	1.55E-08		K22037//innexin;K22037//innexin;K22037//innexin;K22037//innexin	XM_027381501.1 PREDICTED: Penaeus vannamei innexin inx1-like (LOC113828516), mRNA	innexin inx1-like [Penaeus vannamei]	Innexin	[W] TWOG0193 Innexin-type channels	Innexin inx1 OS=Schistocerca americana OX=7009 GN=inx1 PE=1 SV=1	GO:0005921//gap junction;GO:0016021//integral component of membrane;GO:0006811//ion transport;GO:0005886//plasma membrane
CL532.Contig1_All	0.99	6.67	2.752186331	3.71E-11	1.77E-12		K08890//B lymphoid tyrosine kinase [EC:2.7.10.2];K05854//tyrosine-protein kinase Lyn [EC:2.7.10.2]+ko04730//Long-term depression+ko04611//Platelet activation+ko04664//Fc epsilon RI signaling pathway+ko04666//Fc gamma R-mediated phagocytosis+ko04662//B cell receptor signaling pathway+ko05203//Viral carcinogenesis+ko05120//Epithelial cell signaling in Helicobacter pylori infection+ko04062//Chemokin…	XM_027360702.1 PREDICTED: Penaeus vannamei tyrosine-protein kinase SRK3-like (LOC113809176), mRNA	tyrosine-protein kinase SRK3-like [Penaeus vannamei] >ROT86102.1 putative tyrosine-protein kinase Src64B [Penaeus vannamei]	Protein tyrosine and serine/threonine kinase	[T] KOG0197 Tyrosine kinases	Tyrosine-protein kinase Lck OS=Homo sapiens OX=9606 GN=LCK PE=1 SV=6	GO:0005524//ATP binding;GO:0004715//non-membrane spanning protein tyrosine kinase activity
CL2311.Contig1_All	1.13	7.57	2.743970528	2.27E-13	9.12E-15			XM_027383624.1 PREDICTED: Penaeus vannamei ankyrin repeat domain-containing protein 7-like (LOC113830408), mRNA	ankyrin repeat domain-containing protein 7-like [Penaeus vannamei]	RNase H
Unigene19441_All	0.57	3.8	2.736965594	2.18E-07	1.55E-08			XR_003475506.1 PREDICTED: Penaeus vannamei uncharacterized LOC113803450 (LOC113803450), ncRNA	TPA: helicase, putative [Neospora caninum Liverpool]	Adenylyl cyclase N-terminal extracellular and transmembrane region	[GO] KOG4157 beta-1,6-N-acetylglucosaminyltransferase, contains WSC domain	Major centromere autoantigen B OS=Mus musculus OX=10090 GN=Cenpb PE=2 SV=2
Unigene25826_All	0.62	4.12	2.732304217	1.11E-21	2.80E-23		K21444//poly(rC)-binding protein 3/4;K21444//poly(rC)-binding protein 3/4;K21444//poly(rC)-binding protein 3/4;K21444//poly(rC)-binding protein 3/4;K21444//poly(rC)-binding protein 3/4	XM_027375704.1 PREDICTED: Penaeus vannamei poly(rC)-binding protein 1-like (LOC113823061), mRNA	putative poly(rC)-binding protein 3 isoform X1 [Penaeus vannamei]	KH domain	[AR] KOG2190 PolyC-binding proteins alphaCP-1 and related KH domain proteins	Poly(rC)-binding protein 3 OS=Mus musculus OX=10090 GN=Pcbp3 PE=1 SV=3	GO:0003723//RNA binding
Unigene21462_All	0.76	5.05	2.732212064	6.60E-27	1.31E-28		K22037//innexin;K22037//innexin;K22037//innexin;K22037//innexin	XM_027351673.1 PREDICTED: Penaeus vannamei innexin inx2-like (LOC113800868), mRNA	innexin inx2-like [Penaeus vannamei] >ROT82406.1 innexin inx2 [Penaeus vannamei]	Innexin	[W] TWOG0193 Innexin-type channels	Innexin inx2 OS=Schistocerca americana OX=7009 GN=inx2 PE=1 SV=1	GO:0005921//gap junction;GO:0006811//ion transport;GO:0005886//plasma membrane;GO:0016021//integral component of membrane
Unigene17348_All	0.74	4.89	2.724237289	6.62E-06	5.80E-07
CL1774.Contig2_All	0.3	1.97	2.715161224	1.25E-32	2.03E-34	ARID	K11446//histone demethylase JARID1 [EC:1.14.11.-];K11446//histone demethylase JARID1 [EC:1.14.11.-];K11446//histone demethylase JARID1 [EC:1.14.11.-];K11446//histone demethylase JARID1 [EC:1.14.11.-];K11446//histone demethylase JARID1 [EC:1.14.11.-]	XM_027375278.1 PREDICTED: Penaeus vannamei lysine-specific demethylase 5A-like (LOC113822739), transcript variant X1, mRNA	lysine-specific demethylase 5A-like isoform X1 [Penaeus vannamei]	PLU-1-like protein	[R] KOG1246 DNA-binding protein jumonji/RBP2/SMCY, contains JmjC domain	Lysine-specific demethylase 5A OS=Homo sapiens OX=9606 GN=KDM5A PE=1 SV=3	GO:0046872//metal ion binding;GO:0005634//nucleus;GO:0005634//nucleus;GO:0008168//methyltransferase activity;GO:0032259//methylation;GO:0003677//DNA binding
CL1000.Contig2_All	8.89	58.3	2.713240559	0	0		K14290//exportin-1+ko03013//RNA transport+ko04013//MAPK signaling pathway - fly+ko03008//Ribosome biogenesis in eukaryotes+ko05164//Influenza A+ko05166//Human T-cell leukemia virus 1 infection;K14290//exportin-1+ko03013//RNA transport+ko04013//MAPK signaling pathway - fly+ko03008//Ribosome biogenesis in eukaryotes+ko05164//Influenza A+ko05166//Human T-cell leukemia virus 1 infection;K14290//expor…	XM_027379117.1 PREDICTED: Penaeus vannamei exportin-1-like (LOC113826243), mRNA	Exportin-1 [Penaeus vannamei]	CRM1 C terminal	[YU] KOG2020 Nuclear transport receptor CRM1/MSN5 (importin beta superfamily)	Exportin-1 OS=Mus musculus OX=10090 GN=Xpo1 PE=1 SV=1	GO:0006886//intracellular protein transport;GO:0005634//nucleus;GO:0005634//nucleus;GO:0006886//intracellular protein transport;GO:0008536//Ran GTPase binding;GO:0005049//nuclear export signal receptor activity
Unigene6726_All	3.87	25.13	2.6990052	2.65E-27	5.20E-29					PDGF/VEGF domain
Unigene7248_All	0.73	4.73	2.695871814	2.44E-23	5.70E-25			XM_027357870.1 PREDICTED: Penaeus vannamei uncharacterized LOC113806701 (LOC113806701), mRNA	uncharacterized protein LOC113806701 [Penaeus vannamei]	Centromere protein B dimerisation domain
Unigene16499_All	0.6	3.87	2.689299161	4.57E-06	3.93E-07
Unigene9183_All	1.02	6.57	2.687324218	4.57E-06	3.93E-07		K01803//triosephosphate isomerase (TIM) [EC:5.3.1.1]+ko01200//Carbon metabolism+ko00010//Glycolysis / Gluconeogenesis+ko01230//Biosynthesis of amino acids+ko00051//Fructose and mannose metabolism+ko00562//Inositol phosphate metabolism+ko01100//Metabolic pathways;K01803//triosephosphate isomerase (TIM) [EC:5.3.1.1]+ko01200//Carbon metabolism+ko00010//Glycolysis / Gluconeogenesis+ko01230//Biosynthe…	XM_027351812.1 PREDICTED: Penaeus vannamei triosephosphate isomerase-like (LOC113801005), mRNA	triosephosphate isomerase B-like [Penaeus vannamei]	Triosephosphate isomerase	[G] KOG1643 Triosephosphate isomerase	Triosephosphate isomerase OS=Scylla paramamosain OX=85552 PE=1 SV=1	GO:0004807//triose-phosphate isomerase activity;GO:0006094//gluconeogenesis;GO:0006096//glycolytic process;GO:0006096//glycolytic process
CL2321.Contig2_All	0.15	0.96	2.678071905	0.000777522	0.000101641		K14567//U3 small nucleolar RNA-associated protein 14+ko03008//Ribosome biogenesis in eukaryotes;K14567//U3 small nucleolar RNA-associated protein 14+ko03008//Ribosome biogenesis in eukaryotes;K14567//U3 small nucleolar RNA-associated protein 14+ko03008//Ribosome biogenesis in eukaryotes;K14567//U3 small nucleolar RNA-associated protein 14+ko03008//Ribosome biogenesis in eukaryotes;K14567//U3 smal…	XM_027355589.1 PREDICTED: Penaeus vannamei U3 small nucleolar RNA-associated protein 14 homolog A-like (LOC113804709), mRNA	LOW QUALITY PROTEIN: U3 small nucleolar RNA-associated protein 14 homolog A-like [Penaeus vannamei]	Utp14 protein	[S] KOG2172 Uncharacterized conserved protein	U3 small nucleolar RNA-associated protein 14 homolog B OS=Mus musculus OX=10090 GN=Utp14b PE=1 SV=2	GO:0032040//small-subunit processome;GO:0006364//rRNA processing;GO:0006364//rRNA processing
CL3124.Contig2_All	0.64	4.09	2.675957033	8.81E-08	5.96E-09		K04439//beta-arrestin+ko04144//Endocytosis+ko05032//Morphine addiction+ko04340//Hedgehog signaling pathway+ko04010//MAPK signaling pathway+ko04062//Chemokine signaling pathway+ko04740//Olfactory transduction+ko04926//Relaxin signaling pathway+ko04928//Parathyroid hormone synthesis, secretion and action;K04439//beta-arrestin+ko04144//Endocytosis+ko05032//Morphine addiction+ko04340//Hedgehog signal…	XR_003476322.1 PREDICTED: Penaeus vannamei uncharacterized LOC113812503 (LOC113812503), ncRNA	beta-arrestin1 [Penaeus japonicus]	Type VI secretion system, TssN	[T] KOG3865 Arrestin	Beta-arrestin-1 OS=Mus musculus OX=10090 GN=Arrb1 PE=1 SV=1	GO:0007165//signal transduction;GO:0007165//signal transduction;GO:0007165//signal transduction;GO:0007165//signal transduction;GO:0007165//signal transduction
CL3744.Contig1_All	1.03	6.56	2.671051477	1.27E-07	8.79E-09			XM_027361139.1 PREDICTED: Penaeus vannamei serine/arginine-rich splicing factor 7-like (LOC113809512), mRNA
Unigene5271_All	3.51	22.29	2.666853681	1.07E-34	1.64E-36		K05692//actin beta/gamma 1+ko04391//Hippo signaling pathway - fly+ko04390//Hippo signaling pathway+ko05414//Dilated cardiomyopathy (DCM)+ko05416//Viral myocarditis+ko05410//Hypertrophic cardiomyopathy (HCM)+ko05412//Arrhythmogenic right ventricular cardiomyopathy (ARVC)+ko04145//Phagosome+ko05132//Salmonella infection+ko05130//Pathogenic Escherichia coli infection+ko05131//Shigellosis+ko04810//Re…	XM_027371491.1 PREDICTED: Penaeus vannamei actin-like (LOC113819252), transcript variant X2, mRNA	fast-type skeletal muscle actin 3 [Penaeus vannamei]	Actin	[Z] KOG0676 Actin and related proteins	Actin-3, muscle-specific OS=Bactrocera dorsalis OX=27457 PE=2 SV=1	GO:0005737//cytoplasm;GO:0005737//cytoplasm;GO:0005856//cytoskeleton;GO:0005856//cytoskeleton;GO:0005524//ATP binding
Unigene20314_All	0.61	3.87	2.665452419	0.000392496	4.80E-05
CL20.Contig21_All	0.21	1.33	2.662965013	5.17E-08	3.39E-09		K12471//epsin+ko04144//Endocytosis;K12471//epsin+ko04144//Endocytosis;K12471//epsin+ko04144//Endocytosis;K12471//epsin+ko04144//Endocytosis;K12471//epsin+ko04144//Endocytosis	XM_027365643.1 PREDICTED: Penaeus vannamei epsin-2-like (LOC113813622), transcript variant X4, mRNA	epsin-2-like isoform X1 [Penaeus vannamei] >XP_027221442.1 epsin-2-like isoform X1 [Penaeus vannamei] >XP_027221443.1 epsin-2-like isoform X1 [Penaeus vannamei] >XP_027221444.1 epsin-2-like isoform X1 [Penaeus vannamei] >XP_027221445.1 epsin-2-like isoform X1 [Penaeus vannamei] >XP_027221446.1 epsin-2-like isoform X1 [Penaeus vannamei] >XP_027221447.1 epsin-2-like isoform X1 [Penaeus vannamei]	ENTH domain	[F] KOG2056 Equilibrative nucleoside transporter protein	Epsin-2 OS=Mus musculus OX=10090 GN=Epn2 PE=1 SV=1	GO:0030128//clathrin coat of endocytic vesicle;GO:0030128//clathrin coat of endocytic vesicle;GO:0030128//clathrin coat of endocytic vesicle;GO:0006897//endocytosis;GO:0006897//endocytosis
Unigene18124_All	0.61	3.86	2.6617197	5.53E-05	5.71E-06			XR_003476134.1 PREDICTED: Penaeus vannamei uncharacterized LOC113810502 (LOC113810502), ncRNA
Unigene25457_All	0.67	4.23	2.658424663	5.53E-05	5.71E-06		K00799//glutathione S-transferase [EC:2.5.1.18]+ko00980//Metabolism of xenobiotics by cytochrome P450+ko00982//Drug metabolism - cytochrome P450+ko00983//Drug metabolism - other enzymes+ko05225//Hepatocellular carcinoma+ko01524//Platinum drug resistance+ko05418//Fluid shear stress and atherosclerosis+ko00480//Glutathione metabolism+ko05200//Pathways in cancer+ko05204//Chemical carcinogenesis;K007…	XM_027380817.1 PREDICTED: Penaeus vannamei glutathione S-transferase Mu 1-like (LOC113827876), mRNA	glutathione S-transferase Mu 1-like [Penaeus vannamei]	Glutathione S-transferase, N-terminal domain	[O] KOG1695 Glutathione S-transferase	Glutathione S-transferase Mu 1 OS=Macaca fascicularis OX=9541 GN=GSTM1 PE=2 SV=3	GO:0004364//glutathione transferase activity
CL662.Contig5_All	0.17	1.06	2.640457613	9.31E-05	1.00E-05			XR_003475418.1 PREDICTED: Penaeus vannamei uncharacterized LOC113802256 (LOC113802256), transcript variant X2, ncRNA
CL1953.Contig1_All	0.49	3.05	2.637955588	6.36E-07	4.82E-08			AC217779.1 Homo sapiens, clone RP11-111I23, complete sequence
Unigene19295_All	0.65	4.04	2.63584367	5.33E-11	2.57E-12		K09542//crystallin, alpha B+ko04141//Protein processing in endoplasmic reticulum+ko04213//Longevity regulating pathway - multiple species;K09542//crystallin, alpha B+ko04141//Protein processing in endoplasmic reticulum+ko04213//Longevity regulating pathway - multiple species;K09542//crystallin, alpha B+ko04141//Protein processing in endoplasmic reticulum+ko04213//Longevity regulating pathway - mu…	XM_027356811.1 PREDICTED: Penaeus vannamei protein lethal(2)essential for life-like (LOC113805750), transcript variant X2, mRNA	protein lethal(2)essential for life-like isoform X2 [Penaeus vannamei] >ROT76364.1 heat shock protein [Penaeus vannamei]	Hsp20/alpha crystallin family	[O] KOG3591 Alpha crystallins	Heat shock protein beta-1 OS=Gallus gallus OX=9031 GN=HSPB1 PE=2 SV=1
CL3429.Contig3_All	1.06	6.58	2.634023319	4.61E-19	1.32E-20		K09640//transmembrane protease serine 9 [EC:3.4.21.-];K01362//ovochymase [EC:3.4.21.-];K09640//transmembrane protease serine 9 [EC:3.4.21.-];K01317//acrosin [EC:3.4.21.10];K09632//chymotrypsin-like protease [EC:3.4.21.-]+ko04974//Protein digestion and absorption+ko04972//Pancreatic secretion	XM_027369722.1 PREDICTED: Penaeus vannamei chymotrypsin A-like (LOC113817651), transcript variant X4, mRNA	chymotrypsin A-like isoform X1 [Penaeus vannamei] >XP_027225521.1 chymotrypsin A-like isoform X1 [Penaeus vannamei]		[E] KOG3627 Trypsin	Ovochymase-2 OS=Mus musculus OX=10090 GN=Ovch2 PE=2 SV=1	GO:0004252//serine-type endopeptidase activity
Unigene15745_All	2.33	14.43	2.63066944	6.74E-36	9.95E-38		K12757//myosin regulatory light chain 12+ko04360//Axon guidance+ko04810//Regulation of actin cytoskeleton+ko04510//Focal adhesion+ko04611//Platelet activation+ko04530//Tight junction+ko04670//Leukocyte transendothelial migration;K12757//myosin regulatory light chain 12+ko04360//Axon guidance+ko04810//Regulation of actin cytoskeleton+ko04510//Focal adhesion+ko04611//Platelet activation+ko04530//Ti…	XM_027356467.1 PREDICTED: Penaeus vannamei myosin regulatory light chain 2-like (LOC113805465), mRNA	myosin regulatory light chain 2-like [Penaeus vannamei] >ROT76584.1 myosin light chain 2 [Penaeus vannamei]	EF-hand domain	[Z] KOG0031 Myosin regulatory light chain, EF-Hand protein superfamily	Myosin regulatory light chain 2 OS=Bombyx mori OX=7091 PE=1 SV=1	GO:0005509//calcium ion binding
CL2184.Contig1_All	0.42	2.6	2.63005039	4.58E-06	3.93E-07		K10776//DNA ligase 3 [EC:6.5.1.1]+ko03410//Base excision repair;K10776//DNA ligase 3 [EC:6.5.1.1]+ko03410//Base excision repair;K10776//DNA ligase 3 [EC:6.5.1.1]+ko03410//Base excision repair;K10776//DNA ligase 3 [EC:6.5.1.1]+ko03410//Base excision repair	XM_027355776.1 PREDICTED: Penaeus vannamei DNA ligase 3-like (LOC113804867), mRNA	DNA ligase 3-like [Penaeus vannamei]	DNA ligase 3 BRCT domain			GO:0006310//DNA recombination;GO:0003677//DNA binding;GO:0051103//DNA ligation involved in DNA repair;GO:0006310//DNA recombination;GO:0003910//DNA ligase (ATP) activity;GO:0006260//DNA replication;GO:0008270//zinc ion binding;GO:0005524//ATP binding;GO:0006260//DNA replication;GO:0051103//DNA ligation involved in DNA repair;GO:0071897//DNA biosynthetic process;GO:0071897//DNA biosynthetic proces…
Unigene19607_All	0.82	5.03	2.616862585	6.62E-10	3.55E-11			XM_027360078.1 PREDICTED: Penaeus vannamei uncharacterized LOC113808618 (LOC113808618), mRNA	uncharacterized protein LOC113808618 [Penaeus vannamei]	Maltose acetyltransferase
CL948.Contig1_All	0.47	2.88	2.61533615	1.76E-08	1.09E-09			XM_027376838.1 PREDICTED: Penaeus vannamei glycogenin-1-like (LOC113824088), mRNA	glycogenin-1-like [Penaeus vannamei]
Unigene18012_All	0.85	5.19	2.610199792	9.31E-05	1.00E-05			XM_027374211.1 PREDICTED: Penaeus vannamei nuclear receptor subfamily 4 group A member 2-like (LOC113821695), transcript variant X3, mRNA
CL501.Contig1_All	0.29	1.77	2.609624555	0.000392434	4.80E-05		K13089//interleukin enhancer-binding factor 2;K13089//interleukin enhancer-binding factor 2;K13089//interleukin enhancer-binding factor 2;K13089//interleukin enhancer-binding factor 2;K13089//interleukin enhancer-binding factor 2	XM_027361226.1 PREDICTED: Penaeus vannamei interleukin enhancer-binding factor 2 homolog (LOC113809592), transcript variant X4, mRNA	interleukin enhancer-binding factor 2 homolog isoform X3 [Penaeus vannamei]	DZF domain	[K] KOG3793 Transcription factor NFAT, subunit NF45	Interleukin enhancer-binding factor 2 homolog OS=Danio rerio OX=7955 GN=ilf2 PE=2 SV=1	GO:0005524//ATP binding;GO:0006955//immune response;GO:0003723//RNA binding;GO:0016740//transferase activity;GO:0006955//immune response
Unigene3589_All	0.72	4.37	2.601564468	3.52E-08	2.26E-09			XR_003475477.1 PREDICTED: Penaeus vannamei uncharacterized LOC113803010 (LOC113803010), misc_RNA
Unigene17525_All	0.58	3.51	2.597346225	1.30E-05	1.21E-06
CL4000.Contig2_All	2.16	12.92	2.580502853	4.64E-82	2.39E-84		K22369//epoxide hydrolase 4 [EC:3.3.-.-];K22369//epoxide hydrolase 4 [EC:3.3.-.-];K22369//epoxide hydrolase 4 [EC:3.3.-.-];K22369//epoxide hydrolase 4 [EC:3.3.-.-];K22369//epoxide hydrolase 4 [EC:3.3.-.-]	XM_027378080.1 PREDICTED: Penaeus vannamei epoxide hydrolase 4-like (LOC113825264), mRNA	epoxide hydrolase 4-like [Penaeus vannamei]	TAP-like protein	[I] KOG4178 Soluble epoxide hydrolase	Epoxide hydrolase 3 OS=Xenopus tropicalis OX=8364 GN=ephx3 PE=2 SV=1	GO:0016787//hydrolase activity;GO:0016021//integral component of membrane
CL1926.Contig3_All	0.41	2.45	2.579085934	9.71E-10	5.30E-11			XM_027380995.1 PREDICTED: Penaeus vannamei jupiter microtubule associated homolog 1-like (LOC113828057), transcript variant X1, mRNA	microtubule-associated protein Jupiter-like isoform X1 [Penaeus vannamei]	Microtubule-Associated protein Jupiter		Microtubule-associated protein Jupiter OS=Drosophila melanogaster OX=7227 GN=Jupiter PE=1 SV=2
Unigene12163_All	0.64	3.81	2.573647187	4.29E-07	3.18E-08			MN996265.1 Penaeus vannamei anti-lipopolisaccharide factor 3 (ALF3) gene, complete cds	hypothetical protein C7M84_007877, partial [Penaeus vannamei]	ABC transporter transmembrane region
CL745.Contig1_All	1.83	10.88	2.571763003	3.09E-06	2.58E-07		K06840//semaphorin 3+ko04360//Axon guidance	LR778277.1 Coregonus sp. 'balchen' genome assembly, chromosome: 25	hypothetical protein RLOC_00005923 [Lonchura striata domestica]				GO:0016021//integral component of membrane
CL210.Contig3_All	7.65	45.47	2.571383351	1.29E-88	6.10E-91		K10104//ficolin;K10955//mucin-2+ko05226//Gastric cancer+ko05146//Amoebiasis;K10955//mucin-2+ko05226//Gastric cancer+ko05146//Amoebiasis;K21125//mucin-5AC+ko04657//IL-17 signaling pathway	XR_003477565.1 PREDICTED: Penaeus vannamei techylectin-5A-like (LOC113824943), transcript variant X2, misc_RNA	fibrinogen-like protein [Penaeus merguiensis]	Fibrinogen beta and gamma chains, C-terminal globular domain	[R] KOG2579 Ficolin and related extracellular proteins	Mucin-5AC OS=Homo sapiens OX=9606 GN=MUC5AC PE=1 SV=4
CL593.Contig4_All	0.56	3.31	2.563332485	1.58E-06	1.26E-07		K21848//lipid intermediate transporter;K21848//lipid intermediate transporter;K21848//lipid intermediate transporter;K21848//lipid intermediate transporter	XR_003476111.1 PREDICTED: Penaeus vannamei uncharacterized LOC113810151 (LOC113810151), ncRNA	hypothetical protein Anas_03305 [Armadillidium nasatum]	Arv1-like family	[S] KOG3134 Predicted membrane protein	Protein ARV1 OS=Homo sapiens OX=9606 GN=ARV1 PE=1 SV=1	GO:0032366//intracellular sterol transport;GO:0016021//integral component of membrane;GO:0032366//intracellular sterol transport
CL607.Contig1_All	0.54	3.19	2.562525112	2.06E-08	1.30E-09		K06252//tenascin+ko04512//ECM-receptor interaction+ko04510//Focal adhesion+ko05206//MicroRNAs in cancer+ko04151//PI3K-Akt signaling pathway+ko05165//Human papillomavirus infection;K06252//tenascin+ko04512//ECM-receptor interaction+ko04510//Focal adhesion+ko05206//MicroRNAs in cancer+ko04151//PI3K-Akt signaling pathway+ko05165//Human papillomavirus infection;K06252//tenascin+ko04512//ECM-receptor …	XM_027357345.1 PREDICTED: Penaeus vannamei ficolin-1-like (LOC113806222), mRNA	ficolin-1-like [Penaeus vannamei]	Fibrinogen beta and gamma chains, C-terminal globular domain	[R] KOG2579 Ficolin and related extracellular proteins	Tenascin-R OS=Homo sapiens OX=9606 GN=TNR PE=1 SV=3	GO:0016021//integral component of membrane
CL3830.Contig1_All	0.21	1.24	2.561878888	3.28E-05	3.24E-06		K11499//centromere protein F;K11499//centromere protein F;K10421//CAP-Gly domain-containing linker protein 1+ko04150//mTOR signaling pathway;K10352//myosin heavy chain+ko04530//Tight junction;K10388//plectin	XM_027383692.1 PREDICTED: Penaeus vannamei alpha-taxilin-like (LOC113830483), transcript variant X2, mRNA	alpha-taxilin-like isoform X1 [Penaeus vannamei]	Myosin-like coiled-coil protein	[Z] KOG1850 Myosin-like coiled-coil protein	Gamma-taxilin OS=Homo sapiens OX=9606 GN=TXLNG PE=1 SV=2	GO:0019905//syntaxin binding
CL1213.Contig1_All	0.6	3.52	2.552541023	3.00E-22	7.31E-24		K12893//splicing factor, arginine/serine-rich 4/5/6+ko03040//Spliceosome+ko05168//Herpes simplex infection;K12893//splicing factor, arginine/serine-rich 4/5/6+ko03040//Spliceosome+ko05168//Herpes simplex infection;K12893//splicing factor, arginine/serine-rich 4/5/6+ko03040//Spliceosome+ko05168//Herpes simplex infection;K12893//splicing factor, arginine/serine-rich 4/5/6+ko03040//Spliceosome+ko051…	XM_027381714.1 PREDICTED: Penaeus vannamei serine/arginine-rich splicing factor 5-like (LOC113828698), transcript variant X2, mRNA	serine/arginine-rich splicing factor 4-like isoform X2 [Penaeus vannamei]	RNA recognition motif. (a.k.a. RRM, RBD, or RNP domain)	[A] KOG0106 Alternative splicing factor SRp55/B52/SRp75 (RRM superfamily)	Serine/arginine-rich splicing factor 6 OS=Homo sapiens OX=9606 GN=SRSF6 PE=1 SV=2	GO:0003729//mRNA binding;GO:0000381//regulation of alternative mRNA splicing, via spliceosome;GO:0000381//regulation of alternative mRNA splicing, via spliceosome;GO:0000381//regulation of alternative mRNA splicing, via spliceosome;GO:0000381//regulation of alternative mRNA splicing, via spliceosome;GO:0005634//nucleus;GO:0005634//nucleus;GO:0003723//RNA binding;GO:0045292//mRNA cis splicing, via…
CL2091.Contig2_All	0.46	2.67	2.537133976	0.000233211	2.71E-05			XM_027377588.1 PREDICTED: Penaeus vannamei ubiquitin domain-containing protein 2-like (LOC113824799), transcript variant X2, mRNA	ubiquitin domain-containing protein 2-like isoform X1 [Penaeus vannamei]	Ubiquitin-binding domain	[S] KOG0013 Uncharacterized conserved protein	Ubiquitin domain-containing protein 2 OS=Bos taurus OX=9913 GN=UBTD2 PE=2 SV=1
CL2398.Contig3_All	0.3	1.74	2.5360529	6.40E-16	2.18E-17	ARID	K06107//erythrocyte membrane protein band 4.1;K06107//erythrocyte membrane protein band 4.1;K06107//erythrocyte membrane protein band 4.1;K06107//erythrocyte membrane protein band 4.1;K06107//erythrocyte membrane protein band 4.1	XM_027379462.1 PREDICTED: Penaeus vannamei protein 4.1 homolog (LOC113826562), mRNA	LOW QUALITY PROTEIN: protein 4.1 homolog [Penaeus vannamei]	4.1 protein C-terminal domain (CTD)	[R] KOG3527 Erythrocyte membrane protein 4.1 and related proteins of the ERM family	Band 4.1-like protein 1 OS=Homo sapiens OX=9606 GN=EPB41L1 PE=1 SV=2	GO:0005856//cytoskeleton;GO:0005198//structural molecule activity;GO:0003779//actin binding;GO:0005856//cytoskeleton
CL378.Contig6_All	0.24	1.39	2.533978572	1.74E-10	8.81E-12		K09173//regulatory factor X 1/2/3;K05287//phosphatidylinositol glycan, class F [EC:2.7.-.-]+ko00563//Glycosylphosphatidylinositol (GPI)-anchor biosynthesis+ko01100//Metabolic pathways	XM_027378747.1 PREDICTED: Penaeus vannamei methyltransferase-like protein 25 (LOC113825890), transcript variant X12, mRNA	methyltransferase-like protein 25 isoform X2 [Penaeus vannamei] >XP_027234538.1 methyltransferase-like protein 25 isoform X2 [Penaeus vannamei] >XP_027234540.1 methyltransferase-like protein 25 isoform X2 [Penaeus vannamei] >XP_027234541.1 methyltransferase-like protein 25 isoform X2 [Penaeus vannamei] >XP_027234542.1 methyltransferase-like protein 25 isoform X2 [Penaeus vannamei] >XP_027234543.1…	Methyltransferase domain	[A] KOG2651 rRNA adenine N-6-methyltransferase
Unigene17215_All	0.14	0.81	2.532495081	4.41E-13	1.81E-14		K06115//spectrin beta;K06115//spectrin beta;K06115//spectrin beta;K06115//spectrin beta	XM_027352182.1 PREDICTED: Penaeus vannamei spectrin beta chain-like (LOC113801627), transcript variant X8, mRNA	Spectrin beta chain [Armadillidium nasatum]	Spectrin repeat	[Z] KOG0517 Beta-spectrin	Spectrin beta chain OS=Drosophila melanogaster OX=7227 GN=beta-Spec PE=1 SV=2	GO:0003779//actin binding;GO:0008091//spectrin;GO:0008091//spectrin;GO:0051693//actin filament capping;GO:0005543//phospholipid binding;GO:0051693//actin filament capping;GO:0008091//spectrin;GO:0005200//structural constituent of cytoskeleton;GO:0051693//actin filament capping;GO:0051693//actin filament capping
CL2799.Contig2_All	0.52	3	2.528378972	0.000156838	1.75E-05			XM_027353559.1 PREDICTED: Penaeus vannamei uncharacterized LOC113802909 (LOC113802909), mRNA	hypothetical protein C7M84_002673 [Penaeus vannamei]				GO:0016021//integral component of membrane
Unigene11001_All	1.14	6.57	2.526859546	3.22E-20	8.70E-22		K07375//tubulin beta+ko04145//Phagosome+ko05130//Pathogenic Escherichia coli infection+ko04540//Gap junction;K07375//tubulin beta+ko04145//Phagosome+ko05130//Pathogenic Escherichia coli infection+ko04540//Gap junction;K07375//tubulin beta+ko04145//Phagosome+ko05130//Pathogenic Escherichia coli infection+ko04540//Gap junction	XM_027379564.1 PREDICTED: Penaeus vannamei tubulin beta chain-like (LOC113826673), mRNA	Tubulin beta-2 chain [Armadillidium nasatum]	Tubulin/FtsZ family, GTPase domain	[Z] KOG1375 Beta tubulin	Tubulin beta-4B chain OS=Bos taurus OX=9913 GN=TUBB4B PE=2 SV=1	GO:0005200//structural constituent of cytoskeleton;GO:0005874//microtubule;GO:0007017//microtubule-based process;GO:0003924//GTPase activity;GO:0005737//cytoplasm;GO:0005737//cytoplasm;GO:0005874//microtubule;GO:0005525//GTP binding
CL400.Contig2_All	0.52	2.98	2.518728802	1.30E-05	1.21E-06		K17770//mitochondrial import receptor subunit TOM20;K17770//mitochondrial import receptor subunit TOM20;K17770//mitochondrial import receptor subunit TOM20;K17770//mitochondrial import receptor subunit TOM20	XM_027374097.1 PREDICTED: Penaeus vannamei mitochondrial import receptor subunit TOM20 homolog (LOC113821585), mRNA	mitochondrial import receptor subunit TOM20 homolog [Penaeus vannamei]		[U] KOG4056 Translocase of outer mitochondrial membrane complex, subunit TOM20	Mitochondrial import receptor subunit TOM20 homolog OS=Pongo abelii OX=9601 GN=TOMM20 PE=2 SV=1	GO:0005742//mitochondrial outer membrane translocase complex;GO:0016021//integral component of membrane;GO:0005742//mitochondrial outer membrane translocase complex;GO:0005742//mitochondrial outer membrane translocase complex;GO:0006605//protein targeting;GO:0006605//protein targeting
CL242.Contig3_All	0.39	2.2	2.495957495	3.70E-05	3.67E-06		K16942//septin 2+ko05100//Bacterial invasion of epithelial cells;K16942//septin 2+ko05100//Bacterial invasion of epithelial cells;K16942//septin 2+ko05100//Bacterial invasion of epithelial cells;K16942//septin 2+ko05100//Bacterial invasion of epithelial cells	XM_027378359.1 PREDICTED: Penaeus vannamei septin-2B-like (LOC113825507), transcript variant X2, mRNA	septin-2B-like isoform X1 [Penaeus vannamei]	Septin	[DZU] KOG2655 Septin family protein (P-loop GTPase)	Septin-2B OS=Xenopus laevis OX=8355 GN=sept2-b PE=2 SV=1	GO:0005525//GTP binding
CL291.Contig1_All	0.72	4.05	2.491853096	6.64E-08	4.41E-09		K10371//troponin I, slow skeletal muscle;K10371//troponin I, slow skeletal muscle;K10371//troponin I, slow skeletal muscle;K18626//trichohyalin;K12327//caldesmon+ko04270//Vascular smooth muscle contraction	JX683729.1 Litopenaeus vannamei clone TPNi2 troponin I mRNA, complete cds	troponin I-like isoform X28 [Penaeus vannamei]	Troponin	[Z] KOG3977 Troponin I	Troponin I OS=Astacus leptodactylus OX=6717 PE=1 SV=1	GO:0005861//troponin complex;GO:0005861//troponin complex;GO:0005861//troponin complex
CL241.Contig3_All	0.21	1.18	2.490325627	0.000430147	5.28E-05		K13171//serine/arginine repetitive matrix protein 1+ko03013//RNA transport+ko03015//mRNA surveillance pathway;K13169//splicing factor, arginine/serine-rich 17;K13165//splicing factor, arginine/serine-rich 12;K13171//serine/arginine repetitive matrix protein 1+ko03013//RNA transport+ko03015//mRNA surveillance pathway	XM_027360714.1 PREDICTED: Penaeus vannamei uncharacterized LOC113809189 (LOC113809189), transcript variant X1, mRNA	hypothetical protein C7M84_007831 [Penaeus vannamei]	C2H2 type zinc-finger (2 copies)	[A] KOG4676 Splicing factor, arginine/serine-rich	Uncharacterized protein DDB_G0287625 OS=Dictyostelium discoideum OX=44689 GN=DDB_G0287625 PE=4 SV=1
CL233.Contig2_All	0.71	3.97	2.483248078	0.000392557	4.80E-05		K11436//type I protein arginine methyltransferase [EC:2.1.1.319];K11436//type I protein arginine methyltransferase [EC:2.1.1.319];K11436//type I protein arginine methyltransferase [EC:2.1.1.319]	XM_027351509.1 PREDICTED: Penaeus vannamei protein arginine N-methyltransferase 3-like (LOC113800708), mRNA	LOW QUALITY PROTEIN: protein arginine N-methyltransferase 3-like [Penaeus vannamei]	PRMT5 oligomerisation domain	[OKT] KOG1499 Protein arginine N-methyltransferase PRMT1 and related enzymes	Protein arginine N-methyltransferase 3 OS=Homo sapiens OX=9606 GN=PRMT3 PE=1 SV=4	GO:0016274//protein-arginine N-methyltransferase activity
Unigene13833_All	1.41	7.88	2.482500467	2.53E-32	4.17E-34
CL1332.Contig3_All	1.71	9.54	2.479992941	2.45E-97	9.87E-100		K01895//acetyl-CoA synthetase [EC:6.2.1.1]+ko01200//Carbon metabolism+ko00010//Glycolysis / Gluconeogenesis+ko00640//Propanoate metabolism+ko00620//Pyruvate metabolism+ko01100//Metabolic pathways+ko00630//Glyoxylate and dicarboxylate metabolism;K01895//acetyl-CoA synthetase [EC:6.2.1.1]+ko01200//Carbon metabolism+ko00010//Glycolysis / Gluconeogenesis+ko00640//Propanoate metabolism+ko00620//Pyruva…	XM_027356987.1 PREDICTED: Penaeus vannamei uncharacterized LOC113805919 (LOC113805919), transcript variant X2, mRNA	LOW QUALITY PROTEIN: acetyl-coenzyme A synthetase 2-like, mitochondrial [Penaeus vannamei]	AMP-binding enzyme	[I] KOG1175 Acyl-CoA synthetase	Acetyl-coenzyme A synthetase 2-like, mitochondrial OS=Homo sapiens OX=9606 GN=ACSS1 PE=1 SV=2
CL283.Contig2_All	1.14	6.35	2.477722767	2.23E-46	2.41E-48	T-box	K13335//peroxin-16+ko04146//Peroxisome;K01362//ovochymase [EC:3.4.21.-];K01362//ovochymase [EC:3.4.21.-];K09640//transmembrane protease serine 9 [EC:3.4.21.-];K09640//transmembrane protease serine 9 [EC:3.4.21.-]	XM_027353093.1 PREDICTED: Penaeus vannamei phenoloxidase-activating factor 2-like (LOC113802490), partial mRNA	unnamed protein product [Schistocephalus solidus]	Trypsin	[E] KOG3627 Trypsin	Bromodomain-containing protein DDB_G0280777 OS=Dictyostelium discoideum OX=44689 GN=DDB_G0280777 PE=4 SV=1	GO:0016021//integral component of membrane
Unigene17240_All	1.49	8.29	2.476059771	3.10E-06	2.58E-07				hypothetical protein BOX15_Mlig016034g1 [Macrostomum lignano]			Bromodomain-containing protein DDB_G0271118 OS=Dictyostelium discoideum OX=44689 GN=DDB_G0271118 PE=4 SV=1
CL2785.Contig1_All	0.37	2.05	2.470026734	0.000156811	1.75E-05			XM_027360858.1 PREDICTED: Penaeus vannamei uncharacterized LOC113809314 (LOC113809314), mRNA	uncharacterized protein LOC113809314 [Penaeus vannamei]
Unigene17578_All	1.15	6.36	2.467392904	1.44E-05	1.34E-06			XM_027376734.1 PREDICTED: Penaeus vannamei interferon alpha-inducible protein 27-like protein 2B (LOC113823997), mRNA
CL3818.Contig2_All	0.65	3.58	2.461447964	9.17E-09	5.54E-10		K07209//inhibitor of nuclear factor kappa-B kinase subunit beta [EC:2.7.11.10]+ko05131//Shigellosis+ko05222//Small cell lung cancer+ko04210//Apoptosis+ko01523//Antifolate resistance+ko04910//Insulin signaling pathway+ko05418//Fluid shear stress and atherosclerosis+ko05170//Human immunodeficiency virus 1 infection+ko04657//IL-17 signaling pathway+ko04658//Th1 and Th2 cell differentiation+ko04659//…	XM_027371627.1 PREDICTED: Penaeus vannamei inhibitor of nuclear factor kappa-B kinase subunit alpha-like (LOC113819389), transcript variant X2, mRNA	inhibitor of nuclear factor kappa-B kinase subunit alpha-like [Penaeus vannamei] >XP_027227428.1 inhibitor of nuclear factor kappa-B kinase subunit alpha-like [Penaeus vannamei]	IQBAL scaffold dimerization domain	[T] KOG4250 TANK binding protein kinase TBK1	Inhibitor of nuclear factor kappa-B kinase subunit alpha OS=Xenopus tropicalis OX=8364 GN=chuk PE=2 SV=1	GO:0004672//protein kinase activity;GO:0005524//ATP binding
CL710.Contig2_All	0.31	1.7	2.455194626	3.78E-17	1.20E-18	zf-C2HC	K16806//MAP7 domain-containing protein 1;K16806//MAP7 domain-containing protein 1;K16806//MAP7 domain-containing protein 1;K16806//MAP7 domain-containing protein 1;K16806//MAP7 domain-containing protein 1	XM_027382608.1 PREDICTED: Penaeus vannamei MAP7 domain-containing protein 2-like (LOC113829433), mRNA	MAP7 domain-containing protein 2-like [Penaeus vannamei]	MAP7 (E-MAP-115) family	[W] LSE0345 A 12S cruciferin seed storage protein/vicilin-like seed storage protein	Ensconsin OS=Gallus gallus OX=9031 GN=MAP7 PE=2 SV=1
CL2279.Contig2_All	0.83	4.55	2.454683304	2.82E-41	3.54E-43		K20478//golgin subfamily B member 1;K12478//early endosome antigen 1+ko04144//Endocytosis+ko04145//Phagosome+ko05152//Tuberculosis;K20478//golgin subfamily B member 1;K16808//nuclear mitotic apparatus protein 1;K11499//centromere protein F	XM_027382986.1 PREDICTED: Penaeus vannamei myosin-9-like (LOC113829812), mRNA	hypothetical protein C7M84_023090 [Penaeus vannamei]	Fez1	[Z] KOG0161 Myosin class II heavy chain	Flagellar attachment zone protein 1 OS=Trypanosoma brucei brucei (strain 927/4 GUTat10.1) OX=185431 GN=FAZ1 PE=4 SV=1
CL287.Contig2_All	1.67	9.15	2.453923641	0.000430013	5.28E-05
Unigene15882_All	1.34	7.32	2.449610648	3.39E-06	2.84E-07			XR_003477911.1 PREDICTED: Penaeus vannamei uncharacterized LOC113829536 (LOC113829536), ncRNA
CL310.Contig1_All	2.46	13.42	2.447654451	6.26E-56	5.23E-58		K01596//phosphoenolpyruvate carboxykinase (GTP) [EC:4.1.1.32]+ko03320//PPAR signaling pathway+ko04910//Insulin signaling pathway+ko00010//Glycolysis / Gluconeogenesis+ko00020//Citrate cycle (TCA cycle)+ko04931//Insulin resistance+ko00620//Pyruvate metabolism+ko04152//AMPK signaling pathway+ko04151//PI3K-Akt signaling pathway+ko04964//Proximal tubule bicarbonate reclamation+ko01100//Metabolic path…	XM_027371589.1 PREDICTED: Penaeus vannamei phosphoenolpyruvate carboxykinase, cytosolic [GTP]-like (LOC113819349), mRNA	phosphoenolpyruvate carboxykinase, cytosolic [GTP]-like [Penaeus vannamei] >ROT66027.1 phosphoenolpyruvate carboxykinase [Penaeus vannamei]	Phosphoenolpyruvate carboxykinase C-terminal P-loop domain	[C] KOG3749 Phosphoenolpyruvate carboxykinase	Phosphoenolpyruvate carboxykinase [GTP] OS=Drosophila melanogaster OX=7227 GN=Pepck PE=2 SV=2	GO:0004613//phosphoenolpyruvate carboxykinase (GTP) activity;GO:0006094//gluconeogenesis;GO:0016301//kinase activity;GO:0005525//GTP binding
CL2707.Contig3_All	6.9	37.59	2.445680648	2.00E-51	1.88E-53				hypothetical protein EYF80_043384 [Liparis tanakae]
CL2202.Contig2_All	0.39	2.12	2.442518236	2.94E-10	1.52E-11	MYB	K11865//protein MYSM1;K11865//protein MYSM1;K11865//protein MYSM1;K11865//protein MYSM1;K11865//protein MYSM1	XM_027369115.1 PREDICTED: Penaeus vannamei MPN domain-containing protein-like (LOC113817102), transcript variant X2, mRNA	MPN domain-containing protein-like [Penaeus vannamei] >XP_027224916.1 MPN domain-containing protein-like [Penaeus vannamei]	Restriction Enzyme Adenine Methylase Associated	[O] KOG1555 26S proteasome regulatory complex, subunit RPN11	MPN domain-containing protein OS=Homo sapiens OX=9606 GN=MPND PE=1 SV=1
CL2513.Contig2_All	0.99	5.36	2.43673257	1.62E-17	5.04E-19			XM_027357453.1 PREDICTED: Penaeus vannamei uncharacterized LOC113806316 (LOC113806316), transcript variant X3, mRNA	hypothetical protein D4764_17G0000410 [Takifugu flavidus]				GO:0016021//integral component of membrane;GO:0050825//ice binding
Unigene1706_All	11.61	62.45	2.4273336	2.49E-299	2.29E-302		K03250//translation initiation factor 3 subunit E+ko03013//RNA transport+ko05160//Hepatitis C	XM_027380935.1 PREDICTED: Penaeus vannamei uncharacterized LOC113827978 (LOC113827978), transcript variant X3, mRNA	hypothetical protein M91_20997, partial [Bos mutus]	Domain of unknown function (DUF4728)			GO:0016021//integral component of membrane
CL2153.Contig6_All	0.78	4.19	2.425404215	1.21E-06	9.56E-08		K01513//ectonucleotide pyrophosphatase/phosphodiesterase family member 1/3 [EC:3.1.4.1 3.6.1.9]+ko00230//Purine metabolism+ko00770//Pantothenate and CoA biosynthesis+ko00240//Pyrimidine metabolism+ko00760//Nicotinate and nicotinamide metabolism+ko00500//Starch and sucrose metabolism+ko00740//Riboflavin metabolism+ko01100//Metabolic pathways;K01513//ectonucleotide pyrophosphatase/phosphodiesterase…	XM_027358130.1 PREDICTED: Penaeus vannamei venom phosphodiesterase 2-like (LOC113806994), transcript variant X6, mRNA	venom phosphodiesterase 2-like isoform X3 [Penaeus vannamei]	DNA/RNA non-specific endonuclease	[R] KOG2645 Type I phosphodiesterase/nucleotide pyrophosphatase	Ectonucleotide pyrophosphatase/phosphodiesterase family member 3 OS=Mus musculus OX=10090 GN=Enpp3 PE=1 SV=2	GO:0003676//nucleic acid binding;GO:0046872//metal ion binding;GO:0016787//hydrolase activity
CL1463.Contig10_All	1.59	8.51	2.420132366	1.85E-07	1.30E-08			LN590718.1 Cyprinus carpio genome assembly common carp genome, scaffold: LG9, chromosome: 9
CL2344.Contig5_All	0.36	1.92	2.415037499	2.84E-07	2.05E-08		K19476//vacuolar protein sorting-associated protein IST1+ko04144//Endocytosis;K19476//vacuolar protein sorting-associated protein IST1+ko04144//Endocytosis;K19476//vacuolar protein sorting-associated protein IST1+ko04144//Endocytosis;K19476//vacuolar protein sorting-associated protein IST1+ko04144//Endocytosis	XM_027378764.1 PREDICTED: Penaeus vannamei IST1 homolog (LOC113825903), transcript variant X1, mRNA	IST1 homolog isoform X1 [Penaeus vannamei]	Endonuclease-reverse transcriptase	[Z] KOG2027 Spindle pole body protein	Proline-rich protein HaeIII subfamily 1 OS=Mus musculus OX=10090 GN=Prh1 PE=2 SV=2	GO:0015031//protein transport
CL526.Contig2_All	0.39	2.08	2.415037499	9.18E-09	5.54E-10		K07277//outer membrane protein insertion porin family;K07277//outer membrane protein insertion porin family;K07277//outer membrane protein insertion porin family;K07277//outer membrane protein insertion porin family	XM_027375960.1 PREDICTED: Penaeus vannamei sorting and assembly machinery component 50 homolog (LOC113823343), transcript variant X1, mRNA	sorting and assembly machinery component 50 homolog isoform X1 [Penaeus vannamei]	Omp85 superfamily domain	[R] KOG2602 Predicted cell surface protein homologous to bacterial outer membrane proteins	Sorting and assembly machinery component 50 homolog A OS=Danio rerio OX=7955 GN=samm50a PE=2 SV=1	GO:0016021//integral component of membrane;GO:0019867//outer membrane
CL1299.Contig4_All	14.67	78.14	2.413192385	7.87E-172	1.55E-174		K22556//mesencephalic astrocyte-derived neurotrophic factor;K22556//mesencephalic astrocyte-derived neurotrophic factor;K22556//mesencephalic astrocyte-derived neurotrophic factor;K22556//mesencephalic astrocyte-derived neurotrophic factor;K22556//mesencephalic astrocyte-derived neurotrophic factor	MK185664.1 Penaeus vannamei mesencephalic astrocyte-derived neurotrophic factor-like protein mRNA, complete cds	mesencephalic astrocyte-derived neurotrophic factor-like protein [Penaeus vannamei]	Degradation arginine-rich protein for mis-folding	[R] KOG4154 Arginine-rich protein	Mesencephalic astrocyte-derived neurotrophic factor homolog OS=Drosophila mojavensis OX=7230 GN=Manf PE=3 SV=1
CL3733.Contig1_All	0.22	1.17	2.410933101	2.19E-05	2.11E-06			XM_027374203.1 PREDICTED: Penaeus vannamei MOB kinase activator-like 1 (LOC113821688), mRNA
Unigene17211_All	3.58	19.02	2.409485754	1.47E-15	5.14E-17			LR584433.1 Salmo trutta genome assembly, chromosome: 5
CL410.Contig1_All	0.26	1.38	2.408084739	0.000392373	4.80E-05		K14308//nuclear pore complex protein Nup54+ko03013//RNA transport;K14308//nuclear pore complex protein Nup54+ko03013//RNA transport;K14308//nuclear pore complex protein Nup54+ko03013//RNA transport;K14308//nuclear pore complex protein Nup54+ko03013//RNA transport;K14308//nuclear pore complex protein Nup54+ko03013//RNA transport	XM_027372550.1 PREDICTED: Penaeus vannamei nucleoporin p54-like (LOC113820236), mRNA	putative nucleoporin p54-like isoform X2 [Penaeus vannamei]	Nucleoporin complex subunit 54	[YU] KOG3091 Nuclear pore complex, p54 component (sc Nup57)	Nuclear pore glycoprotein p62 OS=Homo sapiens OX=9606 GN=NUP62 PE=1 SV=3	GO:0005643//nuclear pore;GO:0005643//nuclear pore;GO:0005643//nuclear pore
Unigene4030_All	2.93	15.52	2.405155988	8.27E-10	4.48E-11			XM_027367858.1 PREDICTED: Penaeus vannamei H/ACA ribonucleoprotein complex subunit gar1-like (LOC113815845), mRNA	H/ACA ribonucleoprotein complex subunit gar1-like [Penaeus vannamei]				GO:0016021//integral component of membrane
CL2696.Contig1_All	2.32	12.26	2.401762269	6.06E-52	5.59E-54		K13172//serine/arginine repetitive matrix protein 2;K12740//NK-tumor recognition protein;K13172//serine/arginine repetitive matrix protein 2	XM_027355520.1 PREDICTED: Penaeus vannamei uncharacterized LOC113804631 (LOC113804631), mRNA	uncharacterized protein LOC113804631 [Penaeus vannamei] >ROT77241.1 hypothetical protein C7M84_004121 [Penaeus vannamei]	Bacterial protein of unknown function (DUF885)
Unigene19586_All	0.51	2.68	2.393663848	0.000701048	9.11E-05			XM_027372244.1 PREDICTED: Penaeus vannamei zinc finger protein Noc-like (LOC113819997), mRNA	zinc finger protein Noc-like [Penaeus vannamei]	Zinc finger, C2H2 type		Zinc finger protein 503 OS=Homo sapiens OX=9606 GN=ZNF503 PE=1 SV=1	GO:0003676//nucleic acid binding
CL3743.Contig1_All	0.29	1.52	2.389946518	3.83E-09	2.23E-10
Unigene20624_All	0.55	2.88	2.388565288	9.30E-06	8.35E-07			XM_027355580.1 PREDICTED: Penaeus vannamei hepatitis A virus cellular receptor 1-like (LOC113804698), transcript variant X2, mRNA		Disulphide isomerase
Unigene21347_All	1.25	6.54	2.387362541	3.93E-05	3.95E-06
Unigene13410_All	0.82	4.27	2.380540255	3.93E-05	3.95E-06			XM_027355278.1 PREDICTED: Penaeus vannamei wolframin-like (LOC113804408), mRNA
Unigene13177_All	5.95	30.96	2.379443898	7.40E-66	5.28E-68			XM_027352046.1 PREDICTED: Penaeus vannamei uncharacterized LOC113801232 (LOC113801232), mRNA	uncharacterized protein LOC113801232 [Penaeus vannamei] >ROT78738.1 hypothetical protein C7M84_002539 [Penaeus vannamei]	Fascin domain
CL210.Contig1_All	1.73	8.96	2.372726694	2.94E-17	9.31E-19		K10104//ficolin;K10955//mucin-2+ko05226//Gastric cancer+ko05146//Amoebiasis;K10955//mucin-2+ko05226//Gastric cancer+ko05146//Amoebiasis;K21125//mucin-5AC+ko04657//IL-17 signaling pathway	XM_027377713.1 PREDICTED: Penaeus vannamei techylectin-5A-like (LOC113824943), transcript variant X1, mRNA	fibrinogen-like protein [Penaeus merguiensis]	Fibrinogen beta and gamma chains, C-terminal globular domain	[R] KOG2579 Ficolin and related extracellular proteins	Mucin-5AC OS=Homo sapiens OX=9606 GN=MUC5AC PE=1 SV=4
CL2952.Contig3_All	0.07	0.36	2.362570079	0.000392619	4.80E-05		K04648//dynactin 1+ko05016//Huntington disease+ko04962//Vasopressin-regulated water reabsorption;K04648//dynactin 1+ko05016//Huntington disease+ko04962//Vasopressin-regulated water reabsorption;K04648//dynactin 1+ko05016//Huntington disease+ko04962//Vasopressin-regulated water reabsorption;K04648//dynactin 1+ko05016//Huntington disease+ko04962//Vasopressin-regulated water reabsorption;K04648//dyn…	XM_027380610.1 PREDICTED: Penaeus vannamei dynactin subunit 1-like (LOC113827722), transcript variant X3, mRNA	dynactin subunit 1-like isoform X2 [Penaeus vannamei]	Dynein associated protein	[DZ] KOG0971 Microtubule-associated protein dynactin DCTN1/Glued	Dynactin subunit 1 OS=Gallus gallus OX=9031 GN=DCTN1 PE=1 SV=2
Unigene21030_All	0.84	4.3	2.355875427	2.30E-16	7.66E-18		K06569//melanoma-associated antigen p97;K06569//melanoma-associated antigen p97;K06569//melanoma-associated antigen p97;K06569//melanoma-associated antigen p97	XM_027359278.1 PREDICTED: Penaeus vannamei transferrin-like (LOC113807950), mRNA	pacifastin heavy chain precursor [Penaeus vannamei]	Transferrin	[P] TWOG0508 Transferrin/Lactotransferrin	Melanotransferrin OS=Homo sapiens OX=9606 GN=MELTF PE=1 SV=2	GO:0005615//extracellular space;GO:0005576//extracellular region
Unigene10788_All	2.16	10.96	2.343144581	5.69E-10	3.03E-11		K10955//mucin-2+ko05226//Gastric cancer+ko05146//Amoebiasis;K21125//mucin-5AC+ko04657//IL-17 signaling pathway;K21125//mucin-5AC+ko04657//IL-17 signaling pathway;K10955//mucin-2+ko05226//Gastric cancer+ko05146//Amoebiasis;K21125//mucin-5AC+ko04657//IL-17 signaling pathway	XM_027357361.1 PREDICTED: Penaeus vannamei cuticle protein 64-like (LOC113806236), mRNA	uncharacterized protein LOC112564005 [Pomacea canaliculata]	WAP-type (Whey Acidic Protein) 'four-disulfide core'	[R] TWOG0094 Lectins containing Jacalin domain	Keratinocyte proline-rich protein OS=Rattus norvegicus OX=10116 GN=Kprp PE=2 SV=1
Unigene7400_All	0.65	3.29	2.339575961	0.000274408	3.23E-05			XM_027352651.1 PREDICTED: Penaeus vannamei estradiol 17-beta-dehydrogenase 8-like (LOC113802141), mRNA
CL4163.Contig2_All	4.46	22.57	2.339290803	5.34E-38	7.33E-40		K02991//small subunit ribosomal protein S6e+ko01521//EGFR tyrosine kinase inhibitor resistance+ko04910//Insulin signaling pathway+ko04714//Thermogenesis+ko03010//Ribosome+ko05205//Proteoglycans in cancer+ko04371//Apelin signaling pathway+ko04151//PI3K-Akt signaling pathway+ko04150//mTOR signaling pathway+ko04066//HIF-1 signaling pathway;K02991//small subunit ribosomal protein S6e+ko01521//EGFR ty…	XM_027355297.1 PREDICTED: Penaeus vannamei 40S ribosomal protein S6-like (LOC113804422), mRNA	40S ribosomal protein S6-like [Penaeus vannamei]	Ribosomal protein S6e	[J] KOG1646 40S ribosomal protein S6	40S ribosomal protein S6 OS=Mus musculus OX=10090 GN=Rps6 PE=1 SV=1	GO:0005840//ribosome;GO:0006412//translation;GO:0003735//structural constituent of ribosome;GO:0003676//nucleic acid binding;GO:0006412//translation;GO:0005840//ribosome
Unigene13609_All	2.07	10.46	2.337180179	1.24E-47	1.29E-49	bHLH	K21958//extracellular serine/threonine protein kinase FAM20C [EC:2.7.11.1];K08741//DNA mismatch repair protein MSH5;K22526//myocardin;K22282//fatty acid hydroxylase domain-containing protein 2;K06760//contactin 2+ko04514//Cell adhesion molecules (CAMs)	AC240625.4 Rattus norvegicus Y Chr BAC RNAEX-92M20 (Amplicon Express Rat SHR-Akr BAC library) complete sequence	hypothetical protein AMELA_G00184770, partial [Ameiurus melas]				GO:0016021//integral component of membrane
CL883.Contig5_All	0.78	3.93	2.332983283	7.91E-07	6.07E-08	MBD	K11590//methyl-CpG-binding domain protein 2;K11590//methyl-CpG-binding domain protein 2;K11590//methyl-CpG-binding domain protein 2;K11590//methyl-CpG-binding domain protein 2;K11590//methyl-CpG-binding domain protein 2	XM_027356720.1 PREDICTED: Penaeus vannamei methyl-CpG-binding domain protein 2-like (LOC113805672), mRNA	LOW QUALITY PROTEIN: methyl-CpG-binding domain protein 2-like [Penaeus vannamei]		[KB] KOG4161 Methyl-CpG binding transcription regulators	Methyl-CpG-binding domain protein 2 OS=Homo sapiens OX=9606 GN=MBD2 PE=1 SV=1	GO:0016581//NuRD complex;GO:0008327//methyl-CpG binding;GO:0016581//NuRD complex;GO:0016581//NuRD complex;GO:0042025//host cell nucleus
CL2923.Contig3_All	0.35	1.76	2.330148602	2.75E-08	1.76E-09		K12580//CCR4-NOT transcription complex subunit 3+ko03018//RNA degradation;K12580//CCR4-NOT transcription complex subunit 3+ko03018//RNA degradation;K12580//CCR4-NOT transcription complex subunit 3+ko03018//RNA degradation;K12580//CCR4-NOT transcription complex subunit 3+ko03018//RNA degradation;K12580//CCR4-NOT transcription complex subunit 3+ko03018//RNA degradation	XM_027352079.1 PREDICTED: Penaeus vannamei CCR4-NOT transcription complex subunit 3-like (LOC113801259), mRNA	LOW QUALITY PROTEIN: dentin sialophosphoprotein-like, partial [Oncorhynchus kisutch]	Not1 N-terminal domain, CCR4-Not complex component	[Y] KOG2992 Nucleolar GTPase/ATPase p130	Protein rtoA OS=Dictyostelium discoideum OX=44689 GN=rtoA PE=2 SV=2
CL835.Contig3_All	0.36	1.81	2.329920886	1.52E-05	1.42E-06		K03251//translation initiation factor 3 subunit D+ko03013//RNA transport;K03251//translation initiation factor 3 subunit D+ko03013//RNA transport;K03251//translation initiation factor 3 subunit D+ko03013//RNA transport;K03251//translation initiation factor 3 subunit D+ko03013//RNA transport;K03251//translation initiation factor 3 subunit D+ko03013//RNA transport	XM_027358442.1 PREDICTED: Penaeus vannamei eukaryotic translation initiation factor 3 subunit D-like (LOC113807229), transcript variant X5, mRNA	eukaryotic translation initiation factor 3 subunit D-like isoform X5 [Penaeus vannamei]	Eukaryotic translation initiation factor 3 subunit 7 (eIF-3)	[J] KOG2479 Translation initiation factor 3, subunit d (eIF-3d)	Eukaryotic translation initiation factor 3 subunit D OS=Aedes aegypti OX=7159 GN=eIF3-S7 PE=3 SV=1	GO:0001732//formation of cytoplasmic translation initiation complex;GO:0003743//translation initiation factor activity;GO:0016282//eukaryotic 43S preinitiation complex;GO:0002191//cap-dependent translational initiation;GO:0005852//eukaryotic translation initiation factor 3 complex;GO:0005852//eukaryotic translation initiation factor 3 complex;GO:0002191//cap-dependent translational initiation;GO:…
Unigene17498_All	2.77	13.83	2.319843275	2.42E-16	8.08E-18			XR_003476896.1 PREDICTED: Penaeus vannamei uncharacterized LOC113818448 (LOC113818448), ncRNA	uncharacterized protein LOC113825421 [Penaeus vannamei] >XP_027234049.1 uncharacterized protein LOC113825421 [Penaeus vannamei] >XP_027234050.1 uncharacterized protein LOC113825421 [Penaeus vannamei] >XP_027234051.1 uncharacterized protein LOC113825421 [Penaeus vannamei]
Unigene17311_All	0.7	3.47	2.309508836	3.23E-07	2.34E-08		K17498//transcription factor SPN1;K17498//transcription factor SPN1;K05030//calcium-activated chloride channel regulator 3/4+ko04972//Pancreatic secretion+ko04924//Renin secretion;K11423//histone-lysine N-methyltransferase SETD2 [EC:2.1.1.43]+ko00310//Lysine degradation;K15176//RNA polymerase-associated protein CTR9	XM_027368449.1 PREDICTED: Penaeus vannamei calcium-activated chloride channel regulator 3A-1-like (LOC113816382), mRNA	calcium-activated chloride channel regulator 3A-1-like [Penaeus vannamei]	Bacterial Ig domain	[A] KOG1869 Splicing coactivator SRm160/300, subunit SRm300	Serine/arginine repetitive matrix protein 2 OS=Mus musculus OX=10090 GN=Srrm2 PE=1 SV=3	GO:0004725//protein tyrosine phosphatase activity;GO:0016021//integral component of membrane
Unigene26028_All	0.98	4.85	2.307131093	3.69E-29	6.76E-31	zf-C2H2	K13094//RNA-binding protein 5/10;K13094//RNA-binding protein 5/10;K13094//RNA-binding protein 5/10;K13094//RNA-binding protein 5/10;K13094//RNA-binding protein 5/10	XM_027362825.1 PREDICTED: Penaeus vannamei RNA-binding protein 5-like (LOC113811154), mRNA	RNA-binding protein 5-like [Penaeus vannamei]	OCRE domain	[K] KOG1874 KEKE-like motif-containing transcription regulator (Rlr1)/suppressor of sin4	RNA-binding protein 5 OS=Xenopus tropicalis OX=8364 GN=rbm5 PE=2 SV=1	GO:0003676//nucleic acid binding
CL279.Contig2_All	1.06	5.23	2.302746682	7.62E-18	2.33E-19			XM_027380592.1 PREDICTED: Penaeus vannamei uncharacterized LOC113827711 (LOC113827711), mRNA	uncharacterized protein LOC113827711 [Penaeus vannamei]	Sulfate permease family
CL2272.Contig1_All	1.66	8.19	2.30268021	0.000105761	1.15E-05			XM_027375825.1 PREDICTED: Penaeus vannamei uncharacterized LOC113823205 (LOC113823205), mRNA	hypothetical protein C7M84_014460 [Penaeus vannamei]
Unigene17479_All	0.67	3.27	2.287057635	0.00044556	5.50E-05			CP020687.1 Oryzias latipes strain Hd-rR chromosome 23 sequence
CL1558.Contig2_All	2.94	14.34	2.286156964	1.68E-15	5.88E-17		K12819//pre-mRNA-processing factor SLU7+ko03040//Spliceosome;K12819//pre-mRNA-processing factor SLU7+ko03040//Spliceosome;K13108//smad nuclear-interacting protein 1;K13100//pre-mRNA-splicing factor CWC22	XM_027369603.1 PREDICTED: Penaeus vannamei pre-mRNA-splicing factor SLU7-like (LOC113817546), mRNA	pre-mRNA-splicing factor CWC22 homolog [Mizuhopecten yessoensis]	Nuclear RNA-splicing-associated protein	[S] KOG2985 Uncharacterized conserved protein	Zinc finger CCHC domain-containing protein 10 OS=Rattus norvegicus OX=10116 GN=Zcchc10 PE=2 SV=2
CL1707.Contig6_All	5.36	25.88	2.271532712	2.15E-48	2.20E-50			XM_027363541.1 PREDICTED: Penaeus vannamei uncharacterized LOC113811741 (LOC113811741), transcript variant X2, mRNA	uncharacterized protein LOC113811741 isoform X1 [Penaeus vannamei] >XP_027219342.1 uncharacterized protein LOC113811741 isoform X1 [Penaeus vannamei] >XP_027219343.1 uncharacterized protein LOC113811741 isoform X1 [Penaeus vannamei] >XP_027219344.1 uncharacterized protein LOC113811741 isoform X1 [Penaeus vannamei] >ROT71767.1 hypothetical protein C7M84_009898 [Penaeus vannamei]	Domain of unknown function (DUF4728)			GO:0016021//integral component of membrane
Unigene16416_All	0.68	3.28	2.270089163	0.000171353	1.94E-05
CL3230.Contig1_All	0.72	3.47	2.268866851	9.30E-06	8.35E-07
CL2235.Contig1_All	0.49	2.36	2.267933205	0.000716261	9.32E-05			XM_027382860.1 PREDICTED: Penaeus vannamei ankyrin repeat domain-containing protein 65-like (LOC113829648), mRNA	ankyrin [Penaeus vannamei]				GO:0016021//integral component of membrane
CL2044.Contig1_All	6.63	31.62	2.253756592	6.06E-87	2.96E-89		K03063//26S proteasome regulatory subunit T3+ko03050//Proteasome+ko05169//Epstein-Barr virus infection;K03063//26S proteasome regulatory subunit T3+ko03050//Proteasome+ko05169//Epstein-Barr virus infection;K03063//26S proteasome regulatory subunit T3+ko03050//Proteasome+ko05169//Epstein-Barr virus infection;K03063//26S proteasome regulatory subunit T3+ko03050//Proteasome+ko05169//Epstein-Barr vir…	XM_027364989.1 PREDICTED: Penaeus vannamei 26S proteasome regulatory subunit 6B-like (LOC113813053), mRNA	26S proteasome regulatory subunit 6B-like [Penaeus vannamei]	ATPase family associated with various cellular activities (AAA)	[O] KOG0727 26S proteasome regulatory complex, ATPase RPT3	26S proteasome regulatory subunit 6B OS=Manduca sexta OX=7130 PE=2 SV=1	GO:0006396//RNA processing;GO:0006396//RNA processing;GO:0003723//RNA binding;GO:0004000//adenosine deaminase activity;GO:0016021//integral component of membrane;GO:0008233//peptidase activity;GO:0030163//protein catabolic process;GO:0005737//cytoplasm;GO:0005524//ATP binding;GO:0005737//cytoplasm;GO:0036402//proteasome-activating ATPase activity
Unigene7519_All	0.61	2.9	2.249171752	2.96E-08	1.89E-09		K10955//mucin-2+ko05226//Gastric cancer+ko05146//Amoebiasis;K22022//mucin-21;K21125//mucin-5AC+ko04657//IL-17 signaling pathway;K21125//mucin-5AC+ko04657//IL-17 signaling pathway	XR_003475477.1 PREDICTED: Penaeus vannamei uncharacterized LOC113803010 (LOC113803010), misc_RNA	DNA mismatch repair protein, C-terminal domain-containing protein [Toxoplasma gondii VEG] >CEL75613.1 TPA: DNA mismatch repair protein, putative [Toxoplasma gondii VEG]	NADH-ubiquinone oxidoreductase MWFE subunit	[T] LSE0513 C 7-transmembrane receptor	Mucin-5AC OS=Homo sapiens OX=9606 GN=MUC5AC PE=1 SV=4	GO:0005524//ATP binding;GO:0030983//mismatched DNA binding;GO:0006298//mismatch repair;GO:0006298//mismatch repair;GO:0006298//mismatch repair;GO:0032300//mismatch repair complex;GO:0032300//mismatch repair complex;GO:0016887//ATPase activity
CL3699.Contig1_All	4.83	22.94	2.247770297	2.10E-70	1.35E-72			XM_027379156.1 PREDICTED: Penaeus vannamei uncharacterized protein DKFZp434B061-like (LOC113826286), transcript variant X3, mRNA	putative proline-rich extensin-like protein EPR1 [Penaeus vannamei]
CL732.Contig3_All	0.31	1.47	2.245476034	1.55E-09	8.64E-11		K13194//double stranded RNA-specific editase B [EC:3.5.-.-];K13194//double stranded RNA-specific editase B [EC:3.5.-.-];K13194//double stranded RNA-specific editase B [EC:3.5.-.-];K13194//double stranded RNA-specific editase B [EC:3.5.-.-]	KF956055.1 Marsupenaeus japonicus double-stranded RNA-specific adenosine deaminase (ADAR) mRNA, complete cds	double-stranded RNA-specific adenosine deaminase [Penaeus japonicus]	Adenosine-deaminase (editase) domain	[A] KOG2777 tRNA-specific adenosine deaminase 1	Double-stranded RNA-specific editase 1 OS=Homo sapiens OX=9606 GN=ADARB1 PE=1 SV=1	GO:0004000//adenosine deaminase activity;GO:0003723//RNA binding;GO:0006396//RNA processing;GO:0006396//RNA processing
CL461.Contig2_All	0.69	3.27	2.244622369	8.68E-07	6.68E-08		K02148//V-type H+-transporting ATPase subunit C+ko04145//Phagosome+ko04721//Synaptic vesicle cycle+ko05323//Rheumatoid arthritis+ko00190//Oxidative phosphorylation+ko05110//Vibrio cholerae infection+ko04150//mTOR signaling pathway+ko05120//Epithelial cell signaling in Helicobacter pylori infection+ko04966//Collecting duct acid secretion+ko01100//Metabolic pathways+ko05165//Human papillomavirus in…	XM_027381427.1 PREDICTED: Penaeus vannamei V-type proton ATPase subunit C-like (LOC113828445), mRNA	V-type proton ATPase subunit C-like [Penaeus vannamei] >ROT84878.1 vacuolar-H-ATPase subunit C [Penaeus vannamei]		[C] KOG2909 Vacuolar H+-ATPase V1 sector, subunit C	V-type proton ATPase subunit C OS=Drosophila melanogaster OX=7227 GN=Vha44 PE=2 SV=5	GO:0033180//proton-transporting V-type ATPase, V1 domain;GO:0033180//proton-transporting V-type ATPase, V1 domain;GO:0015078//proton transmembrane transporter activity
CL349.Contig1_All	0.11	0.52	2.2410081	0.00043008	5.28E-05	zf-C2H2	K17943//pumilio RNA-binding family;K17943//pumilio RNA-binding family;K17943//pumilio RNA-binding family;K17943//pumilio RNA-binding family;K17943//pumilio RNA-binding family	XM_027361012.1 PREDICTED: Penaeus vannamei pumilio homolog 2-like (LOC113809418), mRNA	pumilio-like protein 2, partial [Procambarus clarkii]	Pumilio-family RNA binding repeat	[J] KOG1488 Translational repressor Pumilio/PUF3 and related RNA-binding proteins (Puf superfamily)	Pumilio homolog 1 OS=Gallus gallus OX=9031 GN=PUM1 PE=2 SV=1	GO:0003723//RNA binding
CL834.Contig2_All	0.39	1.84	2.238159737	0.000105743	1.15E-05		K04984//transient receptor potential cation channel subfamily A member 1+ko04750//Inflammatory mediator regulation of TRP channels;K04984//transient receptor potential cation channel subfamily A member 1+ko04750//Inflammatory mediator regulation of TRP channels;K04984//transient receptor potential cation channel subfamily A member 1+ko04750//Inflammatory mediator regulation of TRP channels;K04984…	XM_027366274.1 PREDICTED: Penaeus vannamei uncharacterized LOC113814241 (LOC113814241), partial mRNA	Transient receptor potential cation channel subfamily A member 1 [Penaeus vannamei]	Polycystin cation channel	[R] KOG0510 Ankyrin repeat protein	Serine/arginine repetitive matrix protein 1 OS=Gallus gallus OX=9031 GN=SRRM1 PE=2 SV=1	GO:0016021//integral component of membrane;GO:0005216//ion channel activity
CL159.Contig2_All	0.93	4.38	2.235628248	1.57E-51	1.46E-53		K15501//serine/threonine-protein phosphatase 6 regulatory subunit 3;K15501//serine/threonine-protein phosphatase 6 regulatory subunit 3;K15501//serine/threonine-protein phosphatase 6 regulatory subunit 3;K15501//serine/threonine-protein phosphatase 6 regulatory subunit 3;K15501//serine/threonine-protein phosphatase 6 regulatory subunit 3	XM_027380736.1 PREDICTED: Penaeus vannamei serine/threonine-protein phosphatase 6 regulatory subunit 3-like (LOC113827823), transcript variant X3, mRNA	serine/threonine-protein phosphatase 6 regulatory subunit 3-like isoform X1 [Penaeus vannamei]	SIT4 phosphatase-associated protein	[D] KOG2073 SAP family cell cycle dependent phosphatase-associated protein	Serine/threonine-protein phosphatase 6 regulatory subunit 3 OS=Mus musculus OX=10090 GN=Ppp6r3 PE=1 SV=1
CL2438.Contig2_All	6.49	30.44	2.229677976	3.51E-109	1.23E-111			XM_027377638.1 PREDICTED: Penaeus vannamei uncharacterized LOC113824871 (LOC113824871), mRNA	uncharacterized protein LOC113824871 [Penaeus vannamei]
Unigene17327_All	0.29	1.36	2.229481846	6.03E-06	5.23E-07			XM_027367186.1 PREDICTED: Penaeus vannamei phosphorylase b kinase gamma catalytic chain, skeletal muscle/heart isoform-like (LOC113815105), mRNA
CL464.Contig3_All	0.67	3.14	2.228531558	1.81E-08	1.13E-09		K03012//DNA-directed RNA polymerase II subunit RPB4+ko03020//RNA polymerase+ko05016//Huntington disease;K03012//DNA-directed RNA polymerase II subunit RPB4+ko03020//RNA polymerase+ko05016//Huntington disease;K03012//DNA-directed RNA polymerase II subunit RPB4+ko03020//RNA polymerase+ko05016//Huntington disease;K03012//DNA-directed RNA polymerase II subunit RPB4+ko03020//RNA polymerase+ko05016//Hu…	XM_027370369.1 PREDICTED: Penaeus vannamei DNA-directed RNA polymerase II subunit RPB4-like (LOC113818194), mRNA	DNA-directed RNA polymerase II subunit RPB4-like [Penaeus vannamei] >XP_027226170.1 DNA-directed RNA polymerase II subunit RPB4-like [Penaeus vannamei]	RNA polymerase Rpb4	[K] KOG2351 RNA polymerase II, fourth largest subunit	DNA-directed RNA polymerase II subunit RPB4 OS=Homo sapiens OX=9606 GN=POLR2D PE=1 SV=1	GO:0006352//DNA-templated transcription, initiation;GO:0030880//RNA polymerase complex;GO:0006352//DNA-templated transcription, initiation;GO:0003824//catalytic activity;GO:0030880//RNA polymerase complex;GO:0000166//nucleotide binding;GO:0003899//DNA-directed 5'-3' RNA polymerase activity
CL2355.Contig1_All	1.76	8.24	2.227068909	9.64E-06	8.67E-07			XR_003477216.1 PREDICTED: Penaeus vannamei uncharacterized LOC113821752 (LOC113821752), transcript variant X2, ncRNA
CL165.Contig10_All	0.75	3.51	2.22650853	2.68E-29	4.87E-31	bHLH	K15603//transcription factor 4/12;K15603//transcription factor 4/12;K15603//transcription factor 4/12;K15603//transcription factor 4/12;K15603//transcription factor 4/12	XM_027369718.1 PREDICTED: Penaeus vannamei transcription factor 12-like (LOC113817650), transcript variant X12, mRNA	transcription factor 12-like isoform X7 [Penaeus vannamei]	Helix-loop-helix DNA-binding domain	[K] KOG3910 Helix loop helix transcription factor	Transcription factor 4 OS=Homo sapiens OX=9606 GN=TCF4 PE=1 SV=3
CL2901.Contig2_All	0.54	2.52	2.222392421	8.68E-07	6.68E-08		K11142//cytosol aminopeptidase [EC:3.4.11.1 3.4.11.5]+ko00330//Arginine and proline metabolism+ko00480//Glutathione metabolism+ko01100//Metabolic pathways;K11142//cytosol aminopeptidase [EC:3.4.11.1 3.4.11.5]+ko00330//Arginine and proline metabolism+ko00480//Glutathione metabolism+ko01100//Metabolic pathways;K11142//cytosol aminopeptidase [EC:3.4.11.1 3.4.11.5]+ko00330//Arginine and proline metab…	XM_027363092.1 PREDICTED: Penaeus vannamei cytosol aminopeptidase-like (LOC113811350), transcript variant X3, mRNA	cytosol aminopeptidase-like isoform X3 [Penaeus vannamei]	Cytosol aminopeptidase family, catalytic domain	[R] KOG2597 Predicted aminopeptidase of the M17 family	Cytosol aminopeptidase OS=Xenopus tropicalis OX=8364 GN=lap3 PE=2 SV=1	GO:0004177//aminopeptidase activity;GO:0005737//cytoplasm;GO:0005737//cytoplasm;GO:0008235//metalloexopeptidase activity;GO:0030145//manganese ion binding
CL2514.Contig1_All	0.57	2.66	2.222392421	8.67E-07	6.68E-08		K17495//CUB and sushi domain-containing protein;K17495//CUB and sushi domain-containing protein;K17495//CUB and sushi domain-containing protein;K17495//CUB and sushi domain-containing protein	XM_027370733.1 PREDICTED: Penaeus vannamei sushi, von Willebrand factor type A, EGF and pentraxin domain-containing protein 1-like (LOC113818545), mRNA	sushi, von Willebrand factor type A, EGF and pentraxin domain-containing protein 1-like [Penaeus vannamei]	EGF-like domain	[T] KOG1217 Fibrillins and related proteins containing Ca2+-binding EGF-like domains	Wnt inhibitory factor 1 OS=Danio rerio OX=7955 GN=wif1 PE=2 SV=1	GO:0005509//calcium ion binding
CL1684.Contig2_All	1.25	5.83	2.221567789	1.93E-65	1.39E-67		K04978//transient receptor potential cation channel subfamily M member 3;K04978//transient receptor potential cation channel subfamily M member 3;K04978//transient receptor potential cation channel subfamily M member 3;K04978//transient receptor potential cation channel subfamily M member 3	XM_027364424.1 PREDICTED: Penaeus vannamei transient receptor potential cation channel trpm-like (LOC113812519), mRNA	transient receptor potential cation channel trpm-like [Penaeus vannamei]	Ion transport protein	[PT] KOG3614 Ca2+/Mg2+-permeable cation channels (LTRPC family)	Transient receptor potential cation channel trpm OS=Drosophila melanogaster OX=7227 GN=Trpm PE=1 SV=1	GO:0005216//ion channel activity;GO:0051262//protein tetramerization;GO:0016021//integral component of membrane
CL165.Contig5_All	1.06	4.93	2.217523382	9.87E-27	1.98E-28		K15603//transcription factor 4/12;K15603//transcription factor 4/12;K15603//transcription factor 4/12;K15603//transcription factor 4/12;K15603//transcription factor 4/12	XM_027369718.1 PREDICTED: Penaeus vannamei transcription factor 12-like (LOC113817650), transcript variant X12, mRNA	transcription factor 12-like isoform X10 [Penaeus vannamei]		[K] KOG3910 Helix loop helix transcription factor	Protein daughterless OS=Drosophila melanogaster OX=7227 GN=da PE=1 SV=1	GO:0046983//protein dimerization activity
Unigene18705_All	0.66	3.06	2.212993723	2.29E-06	1.88E-07		K04237//partitioning defective protein 3+ko04391//Hippo signaling pathway - fly+ko04390//Hippo signaling pathway+ko04360//Axon guidance+ko04144//Endocytosis+ko04530//Tight junction+ko04015//Rap1 signaling pathway+ko04080//Neuroactive ligand-receptor interaction+ko04520//Adherens junction+ko04062//Chemokine signaling pathway+ko05165//Human papillomavirus infection;K04237//partitioning defective pr…	XM_027356546.1 PREDICTED: Penaeus vannamei partitioning defective 3 homolog (LOC113805534), transcript variant X10, mRNA	partitioning defective 3 homolog isoform X10 [Penaeus vannamei]		[R] KOG1516 Carboxylesterase and related proteins	Trichohyalin OS=Homo sapiens OX=9606 GN=TCHH PE=1 SV=2
CL3203.Contig1_All	0.65	3.01	2.211251864	9.74E-10	5.32E-11			XM_027369295.1 PREDICTED: Penaeus vannamei splicing factor 3A subunit 3-like (LOC113817269), mRNA	uncharacterized protein LOC113821509 [Penaeus vannamei]
CL1581.Contig1_All	6.23	28.81	2.209265592	5.40E-34	8.41E-36		K03098//apolipoprotein D and lipocalin family protein;K03098//apolipoprotein D and lipocalin family protein;K03098//apolipoprotein D and lipocalin family protein;K03098//apolipoprotein D and lipocalin family protein	XM_027377479.1 PREDICTED: Penaeus vannamei crustacyanin-A1 subunit-like (LOC113824715), mRNA	crustacyanin-A1 subunit-like [Penaeus vannamei] >ROT62673.1 crustacyanin subunit C [Penaeus vannamei]	Lipocalin / cytosolic fatty-acid binding protein family		Crustacyanin-A1 subunit OS=Homarus gammarus OX=6707 PE=1 SV=1	GO:0031409//pigment binding
CL1775.Contig1_All	0.45	2.08	2.208586622	0.000716156	9.32E-05			LR129804.1 Plasmodium yoelii strain 2CL genome assembly, chromosome: 7
CL1433.Contig10_All	0.29	1.34	2.208108195	2.51E-05	2.45E-06		K14301//nuclear pore complex protein Nup107+ko03013//RNA transport;K14301//nuclear pore complex protein Nup107+ko03013//RNA transport;K14301//nuclear pore complex protein Nup107+ko03013//RNA transport;K14301//nuclear pore complex protein Nup107+ko03013//RNA transport;K14301//nuclear pore complex protein Nup107+ko03013//RNA transport	XM_027356129.1 PREDICTED: Penaeus vannamei nuclear pore complex protein Nup107-like (LOC113805177), mRNA	hypothetical protein C7M84_003698 [Penaeus vannamei]	Nuclear pore protein 84 / 107	[YU] KOG1964 Nuclear pore complex, rNup107 component (sc Nup84)	Nuclear pore complex protein Nup107 OS=Rattus norvegicus OX=10116 GN=Nup107 PE=1 SV=1	GO:0031080//nuclear pore outer ring;GO:0006406//mRNA export from nucleus;GO:0017056//structural constituent of nuclear pore;GO:0031965//nuclear membrane;GO:0031080//nuclear pore outer ring;GO:0006406//mRNA export from nucleus;GO:0031080//nuclear pore outer ring;GO:0006406//mRNA export from nucleus;GO:0006606//protein import into nucleus;GO:0006606//protein import into nucleus;GO:0031965//nuclear …
CL2122.Contig2_All	4.4	20.29	2.205193436	1.13E-187	1.96E-190		K18464//WASH complex subunit strumpellin+ko04144//Endocytosis;K18464//WASH complex subunit strumpellin+ko04144//Endocytosis;K18464//WASH complex subunit strumpellin+ko04144//Endocytosis;K18464//WASH complex subunit strumpellin+ko04144//Endocytosis;K18464//WASH complex subunit strumpellin+ko04144//Endocytosis	XM_027360882.1 PREDICTED: Penaeus vannamei WASH complex subunit 5-like (LOC113809325), mRNA	WASH complex subunit 5-like [Penaeus vannamei] >ROT73624.1 Strumpellin [Penaeus vannamei]	Hereditary spastic paraplegia protein strumpellin	[O] KOG0183 20S proteasome, regulatory subunit alpha type PSMA7/PRE6	WASH complex subunit 5 OS=Xenopus tropicalis OX=8364 GN=washc5 PE=2 SV=1	GO:0071203//WASH complex;GO:0071203//WASH complex;GO:0071203//WASH complex
Unigene23182_All	0.51	2.35	2.204091605	9.73E-06	8.76E-07		K06115//spectrin beta;K06115//spectrin beta;K06115//spectrin beta;K06115//spectrin beta;K06115//spectrin beta	XM_027352831.1 PREDICTED: Penaeus vannamei spectrin alpha chain, non-erythrocytic 1-like (LOC113802286), mRNA	spectrin alpha chain, non-erythrocytic 1-like [Penaeus vannamei]	Spectrin repeat	[Z] KOG0517 Beta-spectrin	Spectrin alpha chain, non-erythrocytic 1 OS=Gallus gallus OX=9031 GN=SPTAN1 PE=1 SV=3	GO:0005543//phospholipid binding;GO:0003779//actin binding
CL1012.Contig2_All	0.48	2.19	2.189824559	5.92E-06	5.13E-07			XM_027380338.1 PREDICTED: Penaeus vannamei uncharacterized LOC113827456 (LOC113827456), mRNA	uncharacterized protein LOC113827456 [Penaeus vannamei]			Transcription termination factor 5, mitochondrial OS=Drosophila melanogaster OX=7227 GN=mTerf5 PE=1 SV=1
CL1741.Contig1_All	3.52	16.06	2.189824559	7.75E-35	1.18E-36		K21760//bifunctional lysine-specific demethylase and histidyl-hydroxylase MINA [EC:1.14.11.-]	XM_027375201.1 PREDICTED: Penaeus vannamei uncharacterized LOC113822661 (LOC113822661), mRNA	hypothetical protein C7M84_018237 [Penaeus vannamei]	PT repeat
CL1314.Contig2_All	1.93	8.78	2.185620092	2.26E-06	1.85E-07			XM_027383758.1 PREDICTED: Penaeus vannamei uncharacterized LOC113830551 (LOC113830551), mRNA	uncharacterized protein LOC113830551 [Penaeus vannamei] >ROT78822.1 hypothetical protein C7M84_002449 [Penaeus vannamei]	Uncharacterized conserved protein (DUF2367)			GO:0016021//integral component of membrane
CL190.Contig2_All	0.94	4.27	2.183503408	0.000274453	3.23E-05
CL2763.Contig1_All	1.04	4.72	2.182203331	0.000105724	1.15E-05
Unigene3380_All	7.09	32.13	2.180063448	6.52E-20	1.78E-21	bHLH	K06467//CD22 antigen+ko04640//Hematopoietic cell lineage+ko04514//Cell adhesion molecules (CAMs)+ko04662//B cell receptor signaling pathway;K01540//sodium/potassium-transporting ATPase subunit beta+ko04024//cAMP signaling pathway+ko04022//cGMP-PKG signaling pathway+ko04919//Thyroid hormone signaling pathway+ko04918//Thyroid hormone synthesis+ko04911//Insulin secretion+ko04261//Adrenergic signalin…	LR584410.1 Salmo trutta genome assembly, chromosome: 1	hypothetical protein F7725_004916 [Dissostichus mawsoni]			Putative uncharacterized protein FLJ46204 OS=Homo sapiens OX=9606 PE=5 SV=2	GO:0005887//integral component of plasma membrane
CL3708.Contig2_All	2.24	10.15	2.17990909	2.45E-20	6.57E-22			XM_027374037.1 PREDICTED: Penaeus vannamei uncharacterized LOC113821531 (LOC113821531), transcript variant X2, mRNA	uncharacterized protein LOC113821531 [Penaeus vannamei] >XP_027229838.1 uncharacterized protein LOC113821531 [Penaeus vannamei]
Unigene17594_All	2.19	9.92	2.179409251	0.000701151	9.11E-05			XM_027354683.1 PREDICTED: Penaeus vannamei ovoinhibitor-like (LOC113803873), mRNA	LOW QUALITY PROTEIN: ovoinhibitor-like [Penaeus vannamei]	Viral unique short region 6
Unigene4991_All	0.78	3.53	2.178122154	8.67E-07	6.68E-08			XM_027360575.1 PREDICTED: Penaeus vannamei keratin-associated protein 17-1-like (LOC113809086), mRNA	unnamed protein product, partial [Heligmosomoides polygyrus]
CL351.Contig7_All	1.15	5.2	2.176877762	1.26E-18	3.66E-20			XR_003476820.1 PREDICTED: Penaeus vannamei uncharacterized LOC113817824 (LOC113817824), transcript variant X3, ncRNA
CL20.Contig27_All	0.37	1.67	2.174250927	6.03E-06	5.23E-07		K12471//epsin+ko04144//Endocytosis;K10955//mucin-2+ko05226//Gastric cancer+ko05146//Amoebiasis	XM_027376415.1 PREDICTED: Penaeus vannamei epsin-2-like (LOC113823725), mRNA	epsin-2-like isoform X1 [Penaeus vannamei] >XP_027221442.1 epsin-2-like isoform X1 [Penaeus vannamei] >XP_027221443.1 epsin-2-like isoform X1 [Penaeus vannamei] >XP_027221444.1 epsin-2-like isoform X1 [Penaeus vannamei] >XP_027221445.1 epsin-2-like isoform X1 [Penaeus vannamei] >XP_027221446.1 epsin-2-like isoform X1 [Penaeus vannamei] >XP_027221447.1 epsin-2-like isoform X1 [Penaeus vannamei]		[F] KOG2056 Equilibrative nucleoside transporter protein	Myosin-G heavy chain OS=Dictyostelium discoideum OX=44689 GN=myoG PE=3 SV=1
CL1233.Contig4_All	0.18	0.81	2.169925001	4.07E-05	4.10E-06		K19636//usherin;K19636//usherin;K19636//usherin;K19636//usherin	XM_027375823.1 PREDICTED: Penaeus vannamei phosphatidylinositol phosphatase PTPRQ-like (LOC113823202), transcript variant X2, mRNA	phosphatidylinositol phosphatase PTPRQ-like isoform X1 [Penaeus vannamei]	Fibronectin type III domain	[T] KOG1215 Low-density lipoprotein receptors containing Ca2+-binding EGF-like domains	Usherin OS=Homo sapiens OX=9606 GN=USH2A PE=1 SV=3
Unigene7031_All	0.78	3.51	2.169925001	4.83E-08	3.17E-09
CL442.Contig1_All	1.11	4.99	2.168480139	5.46E-11	2.63E-12			AC215774.4 Pongo abelii BAC clone CH276-59F17 from chromosome unknown, complete sequence
Unigene7113_All	1.05	4.7	2.162271429	4.77E-12	2.12E-13		K10104//ficolin;K10104//ficolin;K06252//tenascin+ko04512//ECM-receptor interaction+ko04510//Focal adhesion+ko05206//MicroRNAs in cancer+ko04151//PI3K-Akt signaling pathway+ko05165//Human papillomavirus infection	XM_027358296.1 PREDICTED: Penaeus vannamei ficolin-1-like (LOC113807116), transcript variant X2, mRNA	ficolin-1-like isoform X3 [Penaeus vannamei]	Fibrinogen beta and gamma chains, C-terminal globular domain	[R] KOG2579 Ficolin and related extracellular proteins	Ficolin-2 OS=Rattus norvegicus OX=10116 GN=Fcn2 PE=2 SV=1
Unigene17779_All	0.91	4.05	2.153983458	5.37E-07	4.04E-08			LR131932.1 Cottoperca gobio genome assembly, chromosome: 24
CL1072.Contig4_All	0.79	3.5	2.147430364	4.82E-08	3.16E-09			XM_027383692.1 PREDICTED: Penaeus vannamei alpha-taxilin-like (LOC113830483), transcript variant X2, mRNA	alpha-taxilin-like isoform X2 [Penaeus vannamei]				GO:0019905//syntaxin binding
Unigene14217_All	0.96	4.24	2.142957954	2.28E-06	1.87E-07			XM_027377238.1 PREDICTED: Penaeus vannamei microtubule-associated protein tau-like (LOC113824507), mRNA
CL81.Contig1_All	18.25	80.46	2.140375274	1.79E-100	7.04E-103		K10955//mucin-2+ko05226//Gastric cancer+ko05146//Amoebiasis	XM_027375674.1 PREDICTED: Penaeus vannamei uncharacterized LOC113823067 (LOC113823067), mRNA	uncharacterized protein LOC113823067 [Penaeus vannamei]	Gram-negative porin
CL1535.Contig1_All	3.8	16.63	2.129716845	2.07E-18	6.06E-20			XM_027351129.1 PREDICTED: Penaeus vannamei anti-lipopolysaccharide factor-like (LOC113800363), mRNA
Unigene12837_All	0.63	2.75	2.126007885	9.61E-06	8.64E-07				hypothetical protein C7M84_007962 [Penaeus vannamei]	YokU-like protein, putative antitoxin
Unigene15913_All	0.94	4.07	2.114296133	9.61E-06	8.64E-07
CL1752.Contig2_All	0.4	1.73	2.112700133	7.86E-08	5.27E-09	Tub	K07378//neuroligin+ko04514//Cell adhesion molecules (CAMs);K07378//neuroligin+ko04514//Cell adhesion molecules (CAMs);K07378//neuroligin+ko04514//Cell adhesion molecules (CAMs);K07378//neuroligin+ko04514//Cell adhesion molecules (CAMs)	XM_027372089.1 PREDICTED: Penaeus vannamei carboxylesterase 4A-like (LOC113819867), mRNA	PREDICTED: uncharacterized serine-rich protein C215.13-like [Megachile rotundata]	Carboxylesterase family	[GO] KOG4157 beta-1,6-N-acetylglucosaminyltransferase, contains WSC domain	Spore coat protein SP96 OS=Dictyostelium discoideum OX=44689 GN=cotA PE=4 SV=2	GO:0003700//DNA-binding transcription factor activity;GO:0004190//aspartic-type endopeptidase activity;GO:0005634//nucleus;GO:0016021//integral component of membrane;GO:0005634//nucleus
CL825.Contig10_All	0.56	2.42	2.111508315	1.53E-20	4.05E-22	ARID	K17095//annexin A7/11;K13098//RNA-binding protein FUS+ko05202//Transcriptional misregulation in cancer;K17095//annexin A7/11;K13098//RNA-binding protein FUS+ko05202//Transcriptional misregulation in cancer;K19720//collagen, type III, alpha+ko04933//AGE-RAGE signaling pathway in diabetic complications+ko04611//Platelet activation+ko05146//Amoebiasis+ko04974//Protein digestion and absorption+ko0492…	XM_027371016.1 PREDICTED: Penaeus vannamei RNA-binding protein cabeza-like (LOC113818823), transcript variant X3, mRNA	RNA-binding protein cabeza-like isoform X1 [Penaeus vannamei]	YqjK-like protein	[R] KOG1995 Conserved Zn-finger protein		GO:0006355//regulation of transcription, DNA-templated;GO:0046872//metal ion binding;GO:0006355//regulation of transcription, DNA-templated;GO:0003723//RNA binding;GO:0006355//regulation of transcription, DNA-templated;GO:0006355//regulation of transcription, DNA-templated
Unigene17328_All	1.39	5.95	2.097804785	0.000104604	1.13E-05		K18271//retinol-binding protein 4	XM_027377474.1 PREDICTED: Penaeus vannamei crustacyanin-C1 subunit-like (LOC113824710), mRNA	crustacyanin-C1 subunit-like [Penaeus vannamei] >ROT62680.1 crustacyanin subunit C [Penaeus vannamei]	Lipocalin / cytosolic fatty-acid binding protein family		Crustacyanin-C1 subunit OS=Homarus gammarus OX=6707 PE=1 SV=1	GO:0031409//pigment binding
CL418.Contig2_All	0.92	3.93	2.094823546	0.000705498	9.17E-05			XM_027372511.1 PREDICTED: Penaeus vannamei translation initiation factor IF-2-like (LOC113820209), mRNA	uncharacterized protein LOC113820209 [Penaeus vannamei]		[AR] KOG2146 Splicing coactivator SRm160/300, subunit SRm160 (contains PWI domain)		GO:0016021//integral component of membrane
CL3287.Contig2_All	3.97	16.92	2.091518656	8.45E-120	2.58E-122		K07883//Ras-related protein Rab-3C;K07883//Ras-related protein Rab-3C;K07883//Ras-related protein Rab-3C	XM_027375140.1 PREDICTED: Penaeus vannamei ras-related protein Rab-3-like (LOC113822611), mRNA	Ras-related protein Rab-3 [Armadillidium vulgare]	Ras family	[U] KOG0093 GTPase Rab3, small G protein superfamily	Ras-related protein Rab-3 OS=Drosophila melanogaster OX=7227 GN=Rab3 PE=1 SV=1	GO:0072659//protein localization to plasma membrane;GO:0031410//cytoplasmic vesicle;GO:0072659//protein localization to plasma membrane;GO:0031982//vesicle;GO:0005768//endosome;GO:0009306//protein secretion;GO:0017157//regulation of exocytosis;GO:0005768//endosome;GO:0017157//regulation of exocytosis;GO:0006904//vesicle docking involved in exocytosis;GO:0008021//synaptic vesicle;GO:0031410//cytop…
CL3813.Contig3_All	1.7	7.23	2.088460901	0.000165733	1.87E-05	bHLH	K21958//extracellular serine/threonine protein kinase FAM20C [EC:2.7.11.1];K08741//DNA mismatch repair protein MSH5;K12330//Rho guanine nucleotide exchange factor 1+ko04810//Regulation of actin cytoskeleton+ko04611//Platelet activation+ko05200//Pathways in cancer+ko05205//Proteoglycans in cancer+ko04270//Vascular smooth muscle contraction+ko04928//Parathyroid hormone synthesis, secretion and acti…	LR584421.1 Salmo trutta genome assembly, chromosome: 23	Acetylcholine receptor subunit alpha-like protein [Ooceraea biroi]			Putative uncharacterized protein FLJ46204 OS=Homo sapiens OX=9606 PE=5 SV=2	GO:0022848//acetylcholine-gated cation-selective channel activity;GO:0016021//integral component of membrane;GO:0004888//transmembrane signaling receptor activity;GO:0045211//postsynaptic membrane;GO:0003676//nucleic acid binding;GO:0022848//acetylcholine-gated cation-selective channel activity
CL630.Contig6_All	0.81	3.43	2.082214763	2.79E-19	7.87E-21		K12893//splicing factor, arginine/serine-rich 4/5/6+ko03040//Spliceosome+ko05168//Herpes simplex infection;K12893//splicing factor, arginine/serine-rich 4/5/6+ko03040//Spliceosome+ko05168//Herpes simplex infection;K12893//splicing factor, arginine/serine-rich 4/5/6+ko03040//Spliceosome+ko05168//Herpes simplex infection;K12893//splicing factor, arginine/serine-rich 4/5/6+ko03040//Spliceosome+ko051…	XM_027363292.1 PREDICTED: Penaeus vannamei serine/arginine-rich splicing factor 4-like (LOC113811523), transcript variant X2, mRNA	serine/arginine-rich splicing factor 5-like isoform X1 [Penaeus vannamei]	RNA recognition motif. (a.k.a. RRM, RBD, or RNP domain)	[A] KOG0106 Alternative splicing factor SRp55/B52/SRp75 (RRM superfamily)	Serine/arginine-rich splicing factor 4 OS=Mus musculus OX=10090 GN=Srsf4 PE=2 SV=1
Unigene17190_All	0.53	2.24	2.079434467	1.22E-07	8.44E-09		K13149//integrator complex subunit 12;K13149//integrator complex subunit 12;K13149//integrator complex subunit 12	XM_027366174.1 PREDICTED: Penaeus vannamei integrator complex subunit 12-like (LOC113814106), transcript variant X2, mRNA	integrator complex subunit 12-like isoform X1 [Penaeus vannamei] >XP_027221975.1 integrator complex subunit 12-like isoform X1 [Penaeus vannamei]	PHD-finger	[R] KOG4323 Polycomb-like PHD Zn-finger protein	Integrator complex subunit 12 OS=Xenopus tropicalis OX=8364 GN=ints12 PE=2 SV=1	GO:0016180//snRNA processing;GO:0016180//snRNA processing;GO:0046872//metal ion binding
Unigene10443_All	5.01	21.15	2.077775155	1.97E-68	1.33E-70		K00815//tyrosine aminotransferase [EC:2.6.1.5]+ko01230//Biosynthesis of amino acids+ko00400//Phenylalanine, tyrosine and tryptophan biosynthesis+ko00360//Phenylalanine metabolism+ko00130//Ubiquinone and other terpenoid-quinone biosynthesis+ko00350//Tyrosine metabolism+ko01100//Metabolic pathways+ko00270//Cysteine and methionine metabolism;K00815//tyrosine aminotransferase [EC:2.6.1.5]+ko01230//Bi…	XM_027378623.1 PREDICTED: Penaeus vannamei 1-aminocyclopropane-1-carboxylate synthase-like protein 1 (LOC113825795), transcript variant X2, mRNA	1-aminocyclopropane-1-carboxylate synthase-like protein 1 isoform X1 [Penaeus vannamei]	Aminotransferase class I and II		1-aminocyclopropane-1-carboxylate synthase-like protein 1 OS=Takifugu rubripes OX=31033 GN=accs PE=3 SV=1	GO:0009058//biosynthetic process;GO:0003824//catalytic activity;GO:0030170//pyridoxal phosphate binding
CL11.Contig7_All	2.76	11.64	2.076350886	1.53E-42	1.85E-44		K02930//large subunit ribosomal protein L4e+ko03010//Ribosome;K02930//large subunit ribosomal protein L4e+ko03010//Ribosome;K02930//large subunit ribosomal protein L4e+ko03010//Ribosome;K02930//large subunit ribosomal protein L4e+ko03010//Ribosome;K02930//large subunit ribosomal protein L4e+ko03010//Ribosome	XM_027350820.1 PREDICTED: Penaeus vannamei 60S ribosomal protein L4-A-like (LOC113800097), transcript variant X1, mRNA	hypothetical protein C7M84_023806 [Penaeus vannamei]	Ribosomal protein L4/L1 family	[A] KOG1475 Ribosomal protein RPL1/RPL2/RL4L4	60S ribosomal protein L4-B OS=Xenopus laevis OX=8355 GN=rpl4-b PE=2 SV=2	GO:0003735//structural constituent of ribosome;GO:0005840//ribosome;GO:0005840//ribosome;GO:0006412//translation;GO:0006412//translation
Unigene5382_All	0.96	4.04	2.073248982	0.000432424	5.32E-05	zf-C2H2	K06467//CD22 antigen+ko04640//Hematopoietic cell lineage+ko04514//Cell adhesion molecules (CAMs)+ko04662//B cell receptor signaling pathway;K04677//mothers against decapentaplegic homolog 6+ko04350//TGF-beta signaling pathway;K22125//myoferlin	LR792553.1 Pseudochaenichthys georgianus genome assembly, chromosome: 8	hypothetical protein FD754_000242, partial [Muntiacus muntjak]			Putative uncharacterized protein FLJ46204 OS=Homo sapiens OX=9606 PE=5 SV=2	GO:0004888//transmembrane signaling receptor activity;GO:0016021//integral component of membrane;GO:0022848//acetylcholine-gated cation-selective channel activity;GO:0003676//nucleic acid binding;GO:0022848//acetylcholine-gated cation-selective channel activity;GO:0045211//postsynaptic membrane
CL1581.Contig2_All	11.14	46.88	2.073223337	1.48E-39	1.96E-41		K18271//retinol-binding protein 4	XM_027377485.1 PREDICTED: Penaeus vannamei crustacyanin-C1 subunit-like (LOC113824721), mRNA	crustacyanin-C1 subunit-like [Penaeus vannamei]	Lipocalin / cytosolic fatty-acid binding protein family	[M] KOG4824 Apolipoprotein D/Lipocalin	Crustacyanin-C1 subunit OS=Homarus gammarus OX=6707 PE=1 SV=1	GO:0031409//pigment binding
CL533.Contig8_All	0.35	1.47	2.070389328	3.23E-07	2.35E-08		K00914//phosphatidylinositol 3-kinase [EC:2.7.1.137]+ko04145//Phagosome+ko04140//Autophagy - animal+ko04070//Phosphatidylinositol signaling system+ko04136//Autophagy - other+ko04371//Apelin signaling pathway+ko00562//Inositol phosphate metabolism+ko05152//Tuberculosis+ko01100//Metabolic pathways+ko05167//Kaposi sarcoma-associated herpesvirus infection;K20796//histone-lysine N-methyltransferase PR…	XM_027361661.1 PREDICTED: Penaeus vannamei uncharacterized LOC113809979 (LOC113809979), transcript variant X1, mRNA	piggyBac transposable element-derived protein 3-like [Penaeus vannamei]	Transposase IS4		PiggyBac transposable element-derived protein 2 OS=Homo sapiens OX=9606 GN=PGBD2 PE=2 SV=1
CL3721.Contig2_All	0.36	1.51	2.068479738	0.000106537	1.16E-05		K00615//transketolase [EC:2.2.1.1]+ko01200//Carbon metabolism+ko01230//Biosynthesis of amino acids+ko00030//Pentose phosphate pathway+ko01100//Metabolic pathways;K00615//transketolase [EC:2.2.1.1]+ko01200//Carbon metabolism+ko01230//Biosynthesis of amino acids+ko00030//Pentose phosphate pathway+ko01100//Metabolic pathways;K00615//transketolase [EC:2.2.1.1]+ko01200//Carbon metabolism+ko01230//Bios…	XM_027380217.1 PREDICTED: Penaeus vannamei transketolase-like protein 2 (LOC113827332), mRNA	Transketolase [Armadillidium nasatum]	Transketolase, thiamine diphosphate binding domain	[G] KOG0523 Transketolase	Transketolase-like protein 2 OS=Mus musculus OX=10090 GN=Tktl2 PE=1 SV=1	GO:0003824//catalytic activity
Unigene23832_All	0.74	3.1	2.06667104	0.000432289	5.32E-05	Homeobox	K19947//F-actin monooxygenase [EC:1.14.13.225];K19947//F-actin monooxygenase [EC:1.14.13.225];K19947//F-actin monooxygenase [EC:1.14.13.225];K19947//F-actin monooxygenase [EC:1.14.13.225]	XM_027362139.1 PREDICTED: Penaeus vannamei F-actin-monooxygenase MICAL2-like (LOC113810462), mRNA	LOW QUALITY PROTEIN: F-actin-monooxygenase MICAL2-like [Penaeus vannamei]	Calponin homology (CH) domain	[TZ] KOG1700 Regulatory protein MLP and related LIM proteins	[F-actin]-monooxygenase MICAL3 OS=Homo sapiens OX=9606 GN=MICAL3 PE=1 SV=2	GO:0046872//metal ion binding
CL2226.Contig5_All	0.53	2.22	2.066495412	2.41E-05	2.35E-06		K00799//glutathione S-transferase [EC:2.5.1.18]+ko00980//Metabolism of xenobiotics by cytochrome P450+ko00982//Drug metabolism - cytochrome P450+ko00983//Drug metabolism - other enzymes+ko05225//Hepatocellular carcinoma+ko01524//Platinum drug resistance+ko05418//Fluid shear stress and atherosclerosis+ko00480//Glutathione metabolism+ko05200//Pathways in cancer+ko05204//Chemical carcinogenesis;K007…	XM_027381105.1 PREDICTED: Penaeus vannamei glutathione S-transferase 1-like (LOC113828161), transcript variant X2, mRNA	glutathione S-transferase 1-like isoform X2 [Penaeus vannamei]	Glutathione S-transferase, N-terminal domain	[O] KOG0867 Glutathione S-transferase	Glutathione S-transferase 1, isoform B OS=Anopheles gambiae OX=7165 GN=GstD1 PE=2 SV=2	GO:0004364//glutathione transferase activity
Unigene8472_All	1.42	5.94	2.064572001	1.71E-12	7.35E-14			XR_003476587.1 PREDICTED: Penaeus vannamei uncharacterized LOC113815349 (LOC113815349), ncRNA		Flagella accessory protein C (FlaC)
Unigene11223_All	2.65	11.07	2.062590957	0.000432491	5.32E-05			BX927363.9 Zebrafish DNA sequence from clone DKEYP-30E7 in linkage group 9, complete sequence
CL1008.Contig5_All	1.02	4.26	2.062284278	0.000432357	5.32E-05			XM_027355486.1 PREDICTED: Penaeus vannamei uncharacterized LOC113804595 (LOC113804595), transcript variant X2, mRNA	uncharacterized protein LOC113804595 isoform X2 [Penaeus vannamei]	Family of unknown function (DUF5472)			GO:0016021//integral component of membrane
CL590.Contig4_All	1.24	5.17	2.05982416	5.04E-18	1.52E-19		K07375//tubulin beta+ko04145//Phagosome+ko05130//Pathogenic Escherichia coli infection+ko04540//Gap junction;K07375//tubulin beta+ko04145//Phagosome+ko05130//Pathogenic Escherichia coli infection+ko04540//Gap junction;K07375//tubulin beta+ko04145//Phagosome+ko05130//Pathogenic Escherichia coli infection+ko04540//Gap junction;K07375//tubulin beta+ko04145//Phagosome+ko05130//Pathogenic Escherichia …	XM_027372252.1 PREDICTED: Penaeus vannamei tubulin beta chain-like (LOC113820001), mRNA	tubulin beta-4B chain isoform X2 [Erpetoichthys calabaricus]	Tubulin/FtsZ family, GTPase domain	[Z] KOG1375 Beta tubulin	Tubulin beta-4B chain OS=Bos taurus OX=9913 GN=TUBB4B PE=2 SV=1	GO:0005737//cytoplasm;GO:0005874//microtubule;GO:0000226//microtubule cytoskeleton organization;GO:0005737//cytoplasm;GO:0005525//GTP binding;GO:0007017//microtubule-based process;GO:0000278//mitotic cell cycle;GO:0005200//structural constituent of cytoskeleton;GO:0005874//microtubule;GO:0003924//GTPase activity;GO:0003725//double-stranded RNA binding
Unigene22600_All	0.85	3.54	2.058214614	0.000165705	1.87E-05			XM_027372256.1 PREDICTED: Penaeus vannamei uncharacterized LOC113820006 (LOC113820006), mRNA
CL2102.Contig2_All	1.53	6.32	2.046392905	2.19E-10	1.12E-11		K19607//X-linked retinitis pigmentosa GTPase regulator;K19607//X-linked retinitis pigmentosa GTPase regulator;K19607//X-linked retinitis pigmentosa GTPase regulator;K19607//X-linked retinitis pigmentosa GTPase regulator	XM_015318968.1 PREDICTED: Polistes dominula uncharacterized LOC107065355 (LOC107065355), transcript variant X3, mRNA	spore wall protein 2-like, partial [Dendronephthya gigantea]
CL198.Contig3_All	1.29	5.31	2.041340795	1.16E-31	1.94E-33	RFX	K15617//LIM domain-binding protein 1+ko05202//Transcriptional misregulation in cancer;K15617//LIM domain-binding protein 1+ko05202//Transcriptional misregulation in cancer;K15617//LIM domain-binding protein 1+ko05202//Transcriptional misregulation in cancer;K15617//LIM domain-binding protein 1+ko05202//Transcriptional misregulation in cancer;K15617//LIM domain-binding protein 1+ko05202//Transcrip…	XM_027360352.1 PREDICTED: Penaeus vannamei LIM domain-binding protein 2-like (LOC113808855), transcript variant X2, mRNA	LIM domain-binding protein 2-like isoform X2 [Penaeus vannamei]	LIM-domain binding protein	[K] KOG2181 LIM domain binding protein LDB1/NLI/CLIM	LIM domain-binding protein 2 OS=Gallus gallus OX=9031 GN=LDB2 PE=2 SV=1	GO:0003712//transcription coregulator activity;GO:0006357//regulation of transcription by RNA polymerase II;GO:0005634//nucleus;GO:0030274//LIM domain binding;GO:0006357//regulation of transcription by RNA polymerase II;GO:0006357//regulation of transcription by RNA polymerase II;GO:0006357//regulation of transcription by RNA polymerase II;GO:0005634//nucleus
Unigene15912_All	0.65	2.66	2.032914622	1.47E-05	1.37E-06			XM_027359247.1 PREDICTED: Penaeus vannamei uncharacterized LOC113807921 (LOC113807921), mRNA	hypothetical protein C7M84_006765 [Penaeus vannamei]		[W] KOG3544 Collagens (type IV and type XIII), and related proteins		GO:0016021//integral component of membrane
CL3756.Contig1_All	1.23	5.03	2.031900084	6.55E-05	6.83E-06
CL4151.Contig1_All	7.41	30.28	2.030819758	3.94E-101	1.53E-103			XR_003475802.1 PREDICTED: Penaeus vannamei uncharacterized LOC113806506 (LOC113806506), ncRNA
Unigene12647_All	1.73	7.04	2.024803391	0.000682169	8.77E-05
Unigene7763_All	94.94	386.19	2.024222853	4.90E-94	2.09E-96		K14739//metallothionein 1/2+ko04212//Longevity regulating pathway - worm+ko04978//Mineral absorption	KP226136.1 Marsupenaeus japonicus metallothionein mRNA, complete cds	metallothionein, partial [Penaeus monodon]			Metallothionein-1 OS=Homarus americanus OX=6706 PE=1 SV=2	GO:0046872//metal ion binding
CL473.Contig5_All	1.21	4.92	2.023651268	5.24E-30	9.32E-32	Fork	K08823//CDC-like kinase [EC:2.7.12.1];K08823//CDC-like kinase [EC:2.7.12.1];K08823//CDC-like kinase [EC:2.7.12.1];K08823//CDC-like kinase [EC:2.7.12.1];K08823//CDC-like kinase [EC:2.7.12.1]	XM_027373277.1 PREDICTED: Penaeus vannamei probable dual specificity protein kinase madd-3 (LOC113820902), transcript variant X6, mRNA	dual specificity protein kinase CLK2 isoform X3 [Cryptotermes secundus]	Protein kinase domain	[T] KOG0671 LAMMER dual specificity kinases	Serine/threonine-protein kinase Doa OS=Drosophila melanogaster OX=7227 GN=Doa PE=1 SV=2	GO:0005524//ATP binding;GO:0004672//protein kinase activity;GO:0004674//protein serine/threonine kinase activity
Unigene1743_All	7.58	30.82	2.023597108	7.76E-37	1.10E-38			XM_027380429.1 PREDICTED: Penaeus vannamei myosin-11-like (LOC113827534), mRNA	myosin-11-like [Penaeus vannamei]
Unigene7774_All	2.15	8.74	2.02329662	0.000262514	3.08E-05
CL508.Contig1_All	0.62	2.52	2.023083613	0.000273457	3.22E-05			XM_027359439.1 PREDICTED: Penaeus vannamei leucine-rich repeat-containing protein 14-like (LOC113808111), transcript variant X1, mRNA	leucine-rich repeat-containing protein 14-like isoform X1 [Penaeus vannamei] >XP_027215241.1 leucine-rich repeat-containing protein 14-like isoform X1 [Penaeus vannamei] >XP_027215243.1 leucine-rich repeat-containing protein 14-like isoform X1 [Penaeus vannamei] >XP_027215244.1 leucine-rich repeat-containing protein 14-like isoform X1 [Penaeus vannamei]
Unigene21926_All	0.78	3.17	2.022936811	0.000682067	8.77E-05
Unigene6197_All	1.58	6.42	2.022648739	0.000681966	8.77E-05
Unigene1207_All	4.26	17.26	2.018507129	6.80E-22	1.69E-23			XM_027366879.1 PREDICTED: Penaeus vannamei uncharacterized LOC113814820 (LOC113814820), mRNA		Scramblase	[S] KOG3594 FOG: Cadherin repeats	Zinc finger CCCH domain-containing protein 13 OS=Mus musculus OX=10090 GN=Zc3h13 PE=1 SV=1
CL4194.Contig1_All	0.86	3.48	2.016678741	6.40E-09	3.82E-10		K20044//phosphatidylinositol-binding clathrin assembly protein;K20044//phosphatidylinositol-binding clathrin assembly protein;K20044//phosphatidylinositol-binding clathrin assembly protein;K20044//phosphatidylinositol-binding clathrin assembly protein;K20044//phosphatidylinositol-binding clathrin assembly protein	XM_027380402.1 PREDICTED: Penaeus vannamei phosphatidylinositol-binding clathrin assembly protein LAP-like (LOC113827504), transcript variant X9, mRNA	phosphatidylinositol-binding clathrin assembly protein LAP-like isoform X8 [Penaeus vannamei]	ANTH domain	[TU] KOG0251 Clathrin assembly protein AP180 and related proteins, contain ENTH domain	Phosphatidylinositol-binding clathrin assembly protein LAP OS=Drosophila melanogaster OX=7227 GN=lap PE=1 SV=3
CL1353.Contig4_All	0.22	0.89	2.016301812	1.47E-05	1.37E-06		K01052//lysosomal acid lipase/cholesteryl ester hydrolase [EC:3.1.1.13]+ko04142//Lysosome+ko04979//Cholesterol metabolism+ko00100//Steroid biosynthesis;K01052//lysosomal acid lipase/cholesteryl ester hydrolase [EC:3.1.1.13]+ko04142//Lysosome+ko04979//Cholesterol metabolism+ko00100//Steroid biosynthesis;K01052//lysosomal acid lipase/cholesteryl ester hydrolase [EC:3.1.1.13]+ko04142//Lysosome+ko049…	XM_027352443.1 PREDICTED: Penaeus vannamei gastric triacylglycerol lipase-like (LOC113801959), mRNA	gastric triacylglycerol lipase-like [Penaeus vannamei]	Partial alpha/beta-hydrolase lipase region	[I] KOG2624 Triglyceride lipase-cholesterol esterase	Lipase member K OS=Homo sapiens OX=9606 GN=LIPK PE=2 SV=2	GO:0016042//lipid catabolic process;GO:0016788//hydrolase activity, acting on ester bonds
CL1705.Contig2_All	0.55	2.22	2.013056153	5.17E-11	2.49E-12		K03175//TNF receptor-associated factor 6 [EC:2.3.2.27]+ko04144//Endocytosis+ko04140//Autophagy - animal+ko05133//Pertussis+ko05222//Small cell lung cancer+ko04214//Apoptosis - fly+ko05170//Human immunodeficiency virus 1 infection+ko04657//IL-17 signaling pathway+ko04380//Osteoclast differentiation+ko04722//Neurotrophin signaling pathway+ko05145//Toxoplasmosis+ko05142//Chagas disease (American try…	XM_027376245.1 PREDICTED: Penaeus vannamei TNF receptor-associated factor 6-like (LOC113823573), transcript variant X4, mRNA	TNF receptor-associated factor 6-like [Penaeus vannamei] >XP_027232044.1 TNF receptor-associated factor 6-like [Penaeus vannamei] >XP_027232045.1 TNF receptor-associated factor 6-like [Penaeus vannamei] >XP_027232046.1 TNF receptor-associated factor 6-like [Penaeus vannamei]	TRAF-type zinc finger	[T] KOG0297 TNF receptor-associated factor	TNF receptor-associated factor 6 OS=Rattus norvegicus OX=10116 GN=Traf6 PE=2 SV=1	GO:0042981//regulation of apoptotic process;GO:0007165//signal transduction;GO:0007165//signal transduction;GO:0007165//signal transduction;GO:0042981//regulation of apoptotic process;GO:0007165//signal transduction;GO:0007165//signal transduction;GO:0008270//zinc ion binding;GO:0042981//regulation of apoptotic process
CL2433.Contig4_All	0.59	2.38	2.012174714	5.32E-14	2.04E-15		K13184//ATP-dependent RNA helicase A [EC:3.6.4.13];K13184//ATP-dependent RNA helicase A [EC:3.6.4.13];K13184//ATP-dependent RNA helicase A [EC:3.6.4.13];K13184//ATP-dependent RNA helicase A [EC:3.6.4.13];K13184//ATP-dependent RNA helicase A [EC:3.6.4.13]	XM_027352733.1 PREDICTED: Penaeus vannamei ATP-dependent RNA helicase A-like (LOC113802200), transcript variant X2, mRNA	Dosage compensation regulator [Penaeus vannamei]	Helicase conserved C-terminal domain	[K] KOG0921 Dosage compensation complex, subunit MLE	ATP-dependent RNA helicase A OS=Bos taurus OX=9913 GN=DHX9 PE=1 SV=1	GO:0004386//helicase activity;GO:0003723//RNA binding;GO:0005524//ATP binding
Unigene13900_All	2.82	11.28	2	3.49E-10	1.82E-11			XM_027367857.1 PREDICTED: Penaeus vannamei uncharacterized LOC113815844 (LOC113815844), mRNA	uncharacterized protein LOC113815844 [Penaeus vannamei]				GO:0016021//integral component of membrane
CL411.Contig4_All	0.95	3.79	1.99619843	3.83E-05	3.85E-06		K19201//Sin3 histone deacetylase corepressor complex component SDS3;K19201//Sin3 histone deacetylase corepressor complex component SDS3;K19201//Sin3 histone deacetylase corepressor complex component SDS3;K19201//Sin3 histone deacetylase corepressor complex component SDS3;K19201//Sin3 histone deacetylase corepressor complex component SDS3	XM_027369451.1 PREDICTED: Penaeus vannamei sin3 histone deacetylase corepressor complex component SDS3-like (LOC113817399), mRNA	sin3 histone deacetylase corepressor complex component SDS3-like [Penaeus vannamei]		[DK] KOG4466 Component of histone deacetylase complex (breast carcinoma metastasis suppressor 1 protein in human)	Sin3 histone deacetylase corepressor complex component SDS3 OS=Bos taurus OX=9913 GN=SUDS3 PE=2 SV=1
Unigene20761_All	3.32	13.18	1.989095224	8.76E-23	2.10E-24			XM_031569363.1 PREDICTED: Clupea harengus transducin-like enhancer protein 3-B (LOC105906541), transcript variant X7, mRNA
CL1901.Contig4_All	0.54	2.14	1.986579484	6.07E-05	6.29E-06		K11315//transcriptional adapter 3+ko05165//Human papillomavirus infection;K11315//transcriptional adapter 3+ko05165//Human papillomavirus infection;K11315//transcriptional adapter 3+ko05165//Human papillomavirus infection;K11315//transcriptional adapter 3+ko05165//Human papillomavirus infection	XM_027359893.1 PREDICTED: Penaeus vannamei transcriptional adapter 3-B-like (LOC113808473), transcript variant X6, mRNA	transcriptional adapter 3-B-like isoform X1 [Penaeus vannamei]	Histone acetyltransferases subunit 3	[B] KOG4191 Histone acetyltransferases PCAF/SAGA/ADA, subunit TADA3L/NGG1	Transcriptional adapter 3 OS=Xenopus tropicalis OX=8364 GN=tada3 PE=2 SV=1
Unigene23233_All	0.74	2.93	1.985303489	2.32E-05	2.24E-06			XM_027368908.1 PREDICTED: Penaeus vannamei uncharacterized LOC113816916 (LOC113816916), mRNA	hypothetical protein C7M84_005654 [Penaeus vannamei]	Uncharacterized protein conserved in bacteria (DUF2141)
CL399.Contig10_All	0.44	1.74	1.983511877	3.83E-05	3.85E-06			XR_003476940.1 PREDICTED: Penaeus vannamei uncharacterized LOC113818936 (LOC113818936), ncRNA
CL696.Contig5_All	0.41	1.62	1.982297998	0.000247704	2.89E-05		K20225//capicua transcriptional repressor+ko04013//MAPK signaling pathway - fly;K08147//MFS transporter, SP family, solute carrier family 2 (facilitated glucose transporter), member 10;K08147//MFS transporter, SP family, solute carrier family 2 (facilitated glucose transporter), member 10;K08147//MFS transporter, SP family, solute carrier family 2 (facilitated glucose transporter), member 10;K081…	XM_027380728.1 PREDICTED: Penaeus vannamei protein spinster homolog 1-like (LOC113827815), mRNA	Major facilitator superfamily [Trinorchestia longiramus]	Major Facilitator Superfamily	[G] KOG1330 Sugar transporter/spinster transmembrane protein	Protein spinster homolog 3 OS=Danio rerio OX=7955 GN=spns3 PE=2 SV=1	GO:0016021//integral component of membrane;GO:0022857//transmembrane transporter activity
Unigene24066_All	0.78	3.07	1.976692627	0.000411087	5.04E-05		K16848//Ras GTPase-activating-like protein IQGAP1+ko04810//Regulation of actin cytoskeleton+ko05205//Proteoglycans in cancer+ko04520//Adherens junction;K16848//Ras GTPase-activating-like protein IQGAP1+ko04810//Regulation of actin cytoskeleton+ko05205//Proteoglycans in cancer+ko04520//Adherens junction;K16848//Ras GTPase-activating-like protein IQGAP1+ko04810//Regulation of actin cytoskeleton+ko0…	XM_027369406.1 PREDICTED: Penaeus vannamei ras GTPase-activating-like protein IQGAP3 (LOC113817373), mRNA	ras GTPase-activating-like protein IQGAP3 [Penaeus vannamei] >ROT67562.1 putative ras GTPase-activating-like protein IQGAP1 isoform X2 [Penaeus vannamei]	RasGAP C-terminus	[T] KOG2128 Ras GTPase-activating protein family - IQGAP	Ras GTPase-activating-like protein IQGAP2 OS=Homo sapiens OX=9606 GN=IQGAP2 PE=1 SV=4	GO:0007165//signal transduction;GO:0007165//signal transduction;GO:0043087//regulation of GTPase activity;GO:0007165//signal transduction;GO:0007165//signal transduction;GO:0007165//signal transduction
CL283.Contig5_All	7	27.45	1.971379322	1.84E-64	1.36E-66		K13335//peroxin-16+ko04146//Peroxisome;K12311//lysosomal alpha-mannosidase [EC:3.2.1.24]+ko04142//Lysosome+ko00511//Other glycan degradation;K01362//ovochymase [EC:3.4.21.-];K01362//ovochymase [EC:3.4.21.-];K09640//transmembrane protease serine 9 [EC:3.4.21.-]	XM_027353100.1 PREDICTED: Penaeus vannamei phenoloxidase-activating factor 2-like (LOC113802496), mRNA	phenoloxidase-activating factor 2-like [Penaeus vannamei]	Trypsin	[E] KOG3627 Trypsin	Phenoloxidase-activating factor 2 OS=Holotrichia diomphalia OX=33394 GN=PPAF2 PE=1 SV=1	GO:0004252//serine-type endopeptidase activity
CL4140.Contig1_All	0.96	3.76	1.969626351	3.66E-05	3.63E-06			XM_027360855.1 PREDICTED: Penaeus vannamei uncharacterized LOC113809313 (LOC113809313), transcript variant X1, mRNA	uncharacterized protein LOC113809313 isoform X1 [Penaeus vannamei]			Wiskott-Aldrich syndrome protein homolog OS=Mus musculus OX=10090 GN=Was PE=1 SV=1
CL753.Contig3_All	1.2	4.69	1.966553517	1.12E-43	1.33E-45		K20278//inositol polyphosphate 5-phosphatase INPP5E [EC:3.1.3.36]+ko04070//Phosphatidylinositol signaling system+ko00562//Inositol phosphate metabolism+ko01100//Metabolic pathways;K20278//inositol polyphosphate 5-phosphatase INPP5E [EC:3.1.3.36]+ko04070//Phosphatidylinositol signaling system+ko00562//Inositol phosphate metabolism+ko01100//Metabolic pathways;K20278//inositol polyphosphate 5-phosph…	XM_027355404.1 PREDICTED: Penaeus vannamei inositol polyphosphate 5-phosphatase E-like (LOC113804514), mRNA	inositol polyphosphate 5-phosphatase E-like [Penaeus vannamei]	Endonuclease/Exonuclease/phosphatase family	[U] KOG0565 Inositol polyphosphate 5-phosphatase and related proteins	Inositol polyphosphate 5-phosphatase E OS=Drosophila melanogaster OX=7227 GN=INPP5E PE=1 SV=1	GO:0046856//phosphatidylinositol dephosphorylation;GO:0016787//hydrolase activity;GO:0046856//phosphatidylinositol dephosphorylation
Unigene7119_All	1.06	4.14	1.965566503	1.39E-05	1.30E-06		K16351//netrin-G2 ligand+ko04360//Axon guidance+ko04514//Cell adhesion molecules (CAMs);K20639//Rho GTPase-activating protein 18/28/40;K17985//activating molecule in BECN1-regulated autophagy protein 1+ko04140//Autophagy - animal+ko04137//Mitophagy - animal	AP022703.1 Plectropomus leopardus DNA, chromosome 4, nearly complete sequence	hypothetical protein D9C73_028006 [Collichthys lucidus]	Protein of unknown function (DUF3043)	[R] KOG4574 RNA-binding protein (contains RRM and Pumilio-like repeats)	Bromodomain-containing protein DDB_G0280777 OS=Dictyostelium discoideum OX=44689 GN=DDB_G0280777 PE=4 SV=1	GO:0055085//transmembrane transport;GO:0004842//ubiquitin-protein transferase activity;GO:0005524//ATP binding;GO:0055085//transmembrane transport;GO:0016021//integral component of membrane;GO:0042626//ATPase-coupled transmembrane transporter activity
Unigene14028_All	4.1	16.01	1.965277493	1.22E-37	1.70E-39	bHLH	K06467//CD22 antigen+ko04640//Hematopoietic cell lineage+ko04514//Cell adhesion molecules (CAMs)+ko04662//B cell receptor signaling pathway;K08741//DNA mismatch repair protein MSH5;K21958//extracellular serine/threonine protein kinase FAM20C [EC:2.7.11.1]	XM_027367707.1 PREDICTED: Penaeus vannamei cysteine dioxygenase type 1-like (LOC113815679), mRNA	hypothetical protein AMELA_G00228880, partial [Ameiurus melas]
Unigene14672_All	1.13	4.41	1.964455883	6.79E-08	4.51E-09			XM_027367791.1 PREDICTED: Penaeus vannamei uncharacterized LOC113815774 (LOC113815774), mRNA	uncharacterized protein LOC113815774 [Penaeus vannamei]
Unigene4345_All	1.18	4.57	1.953407306	9.49E-05	1.02E-05					PDGF/VEGF domain
CL3729.Contig6_All	0.74	2.86	1.950417971	8.80E-10	4.79E-11	zf-C2H2	K10955//mucin-2+ko05226//Gastric cancer+ko05146//Amoebiasis;K10955//mucin-2+ko05226//Gastric cancer+ko05146//Amoebiasis;K10955//mucin-2+ko05226//Gastric cancer+ko05146//Amoebiasis;K10955//mucin-2+ko05226//Gastric cancer+ko05146//Amoebiasis	XR_827500.4 PREDICTED: Esox lucius uncharacterized LOC105007113 (LOC105007113), ncRNA	hypothetical protein C7M84_000664 [Penaeus vannamei]	Sel1 repeat	[WV] KOG1216 von Willebrand factor and related coagulation proteins	Mucin-2 OS=Homo sapiens OX=9606 GN=MUC2 PE=1 SV=2	GO:0032259//methylation;GO:0005247//voltage-gated chloride channel activity;GO:0016021//integral component of membrane;GO:0008168//methyltransferase activity
CL3986.Contig1_All	1.28	4.94	1.948367232	8.65E-13	3.63E-14		K04512//dishevelled associated activator of morphogenesis+ko04310//Wnt signaling pathway;K04512//dishevelled associated activator of morphogenesis+ko04310//Wnt signaling pathway;K04512//dishevelled associated activator of morphogenesis+ko04310//Wnt signaling pathway;K04512//dishevelled associated activator of morphogenesis+ko04310//Wnt signaling pathway;K04512//dishevelled associated activator of…	XM_027353448.1 PREDICTED: Penaeus vannamei inverted formin-2-like (LOC113802820), mRNA	inverted formin-2-like [Penaeus vannamei]	Formin Homology 2 Domain	[TZ] KOG1922 Rho GTPase effector BNI1 and related formins	FH2 domain-containing protein 1 OS=Homo sapiens OX=9606 GN=FHDC1 PE=1 SV=2	GO:0030036//actin cytoskeleton organization;GO:0003779//actin binding;GO:0017048//Rho GTPase binding
CL1982.Contig4_All	5.04	19.42	1.946047562	9.80E-33	1.59E-34		K18273//alpha-tectorin;K21125//mucin-5AC+ko04657//IL-17 signaling pathway;K21125//mucin-5AC+ko04657//IL-17 signaling pathway;K10955//mucin-2+ko05226//Gastric cancer+ko05146//Amoebiasis;K21125//mucin-5AC+ko04657//IL-17 signaling pathway	XM_027372840.1 PREDICTED: Penaeus vannamei filaggrin-2-like (LOC113820488), transcript variant X30, mRNA	filaggrin-2-like isoform X21 [Penaeus vannamei]			Mucin-5AC OS=Homo sapiens OX=9606 GN=MUC5AC PE=1 SV=4
CL1734.Contig2_All	1.08	4.16	1.945552216	0.000432559	5.32E-05		K07573//exosome complex component CSL4+ko03018//RNA degradation;K07573//exosome complex component CSL4+ko03018//RNA degradation;K07573//exosome complex component CSL4+ko03018//RNA degradation	XM_027364426.1 PREDICTED: Penaeus vannamei exosome complex component CSL4-like (LOC113812521), mRNA	exosome complex component CSL4-like [Penaeus vannamei]	Exosome component EXOSC1/CSL4	[J] KOG3409 Exosomal 3'-5' exoribonuclease complex, subunit ski4 (Csl4)	Exosome complex component CSL4 OS=Homo sapiens OX=9606 GN=EXOSC1 PE=1 SV=1	GO:0000178//exosome (RNase complex);GO:0006396//RNA processing;GO:0006396//RNA processing;GO:0003723//RNA binding;GO:0000178//exosome (RNase complex)
Unigene16077_All	0.83	3.19	1.942373182	7.33E-07	5.60E-08			XM_027362281.1 PREDICTED: Penaeus vannamei uncharacterized LOC113810645 (LOC113810645), transcript variant X5, mRNA	uncharacterized protein LOC113810645 isoform X2 [Penaeus vannamei] >ROT72612.1 hypothetical protein C7M84_008973 [Penaeus vannamei]	Zinc finger, C3HC4 type (RING finger)	[O] KOG2177 Predicted E3 ubiquitin ligase		GO:0046872//metal ion binding
Unigene7448_All	1.19	4.57	1.941232592	0.000640685	8.20E-05
Unigene7_All	1.28	4.91	1.939579214	1.20E-39	1.58E-41		K06086//sorbin and SH3 domain containing 1+ko03320//PPAR signaling pathway+ko04910//Insulin signaling pathway+ko04520//Adherens junction;K06086//sorbin and SH3 domain containing 1+ko03320//PPAR signaling pathway+ko04910//Insulin signaling pathway+ko04520//Adherens junction;K06086//sorbin and SH3 domain containing 1+ko03320//PPAR signaling pathway+ko04910//Insulin signaling pathway+ko04520//Adhere…	XM_027354645.1 PREDICTED: Penaeus vannamei uncharacterized LOC113803830 (LOC113803830), mRNA	putative microtubule-associated protein futsch [Penaeus vannamei]	Variant SH3 domain	[T] KOG4225 Sorbin and SH3 domain-containing protein	Vitellogenin-2 OS=Gallus gallus OX=9031 GN=VTG2 PE=1 SV=1
CL2930.Contig2_All	11.37	43.54	1.937109153	3.61E-30	6.35E-32		K03098//apolipoprotein D and lipocalin family protein;K03098//apolipoprotein D and lipocalin family protein;K03098//apolipoprotein D and lipocalin family protein;K18271//retinol-binding protein 4;K18271//retinol-binding protein 4	XM_027377476.1 PREDICTED: Penaeus vannamei crustacyanin-A2 subunit-like (LOC113824712), mRNA	crustacyanin-A2 subunit-like [Penaeus vannamei]	Lipocalin-like domain	[T] LSE0513 C 7-transmembrane receptor	Crustacyanin-A2 subunit OS=Homarus gammarus OX=6707 PE=1 SV=1	GO:0031409//pigment binding
CL2136.Contig1_All	1.05	4.02	1.936806174	1.28E-12	5.48E-14			XM_027380939.1 PREDICTED: Penaeus vannamei uncharacterized LOC113827984 (LOC113827984), mRNA	hypothetical protein C7M84_021602 [Penaeus vannamei]				GO:0016021//integral component of membrane
CL3174.Contig2_All	0.46	1.76	1.935869663	5.31E-10	2.81E-11		K11996//adenylyltransferase and sulfurtransferase [EC:2.7.7.80 2.8.1.11]+ko04122//Sulfur relay system	XR_003477038.1 PREDICTED: Penaeus vannamei transmembrane protein 62-like (LOC113819713), transcript variant X2, misc_RNA	transmembrane protein 62-like [Penaeus vannamei]	Bacterial Ig-like domain	[A] KOG0701 dsRNA-specific nuclease Dicer and related ribonucleases	Transmembrane protein 62 OS=Mus musculus OX=10090 GN=Tmem62 PE=2 SV=1	GO:0016021//integral component of membrane
CL1955.Contig1_All	1.8	6.86	1.93021167	6.09E-12	2.73E-13		K19720//collagen, type III, alpha+ko04933//AGE-RAGE signaling pathway in diabetic complications+ko04611//Platelet activation+ko05146//Amoebiasis+ko04974//Protein digestion and absorption+ko04926//Relaxin signaling pathway;K10955//mucin-2+ko05226//Gastric cancer+ko05146//Amoebiasis;K10955//mucin-2+ko05226//Gastric cancer+ko05146//Amoebiasis;K10955//mucin-2+ko05226//Gastric cancer+ko05146//Amoebias…	XM_027380568.1 PREDICTED: Penaeus vannamei uncharacterized LOC113827665 (LOC113827665), transcript variant X2, mRNA	uncharacterized protein LOC113827665 isoform X2 [Penaeus vannamei]	Chitin binding Peritrophin-A domain		Salivary glue protein Sgs-3 OS=Drosophila simulans OX=7240 GN=Sgs3 PE=2 SV=2	GO:0005581//collagen trimer;GO:0008061//chitin binding;GO:0005576//extracellular region
CL2035.Contig3_All	0.99	3.76	1.925232232	2.41E-08	1.53E-09		K22904//presqualene diphosphate phosphatase [EC:3.1.3.-];K22904//presqualene diphosphate phosphatase [EC:3.1.3.-];K22904//presqualene diphosphate phosphatase [EC:3.1.3.-];K22904//presqualene diphosphate phosphatase [EC:3.1.3.-];K22904//presqualene diphosphate phosphatase [EC:3.1.3.-]	XM_027383581.1 PREDICTED: Penaeus vannamei phospholipid phosphatase 6-like (LOC113830369), transcript variant X1, mRNA	phospholipid phosphatase 6-like [Penaeus vannamei] >XP_027239383.1 phospholipid phosphatase 6-like [Penaeus vannamei] >XP_027239384.1 phospholipid phosphatase 6-like [Penaeus vannamei] >ROT83355.1 Presqualene diphosphate phosphatase [Penaeus vannamei]	PAP2 superfamily	[S] KOG4268 Uncharacterized conserved protein containing PAP2 domain	Phospholipid phosphatase 6 OS=Rattus norvegicus OX=10116 GN=Plpp6 PE=2 SV=1	GO:0016021//integral component of membrane
Unigene20627_All	10.61	40.23	1.922847082	1.79E-77	1.00E-79			XM_027368880.1 PREDICTED: Penaeus vannamei uncharacterized LOC113816893 (LOC113816893), transcript variant X2, mRNA
CL1401.Contig2_All	2.48	9.36	1.916168409	1.00E-22	2.40E-24		K12862//pleiotropic regulator 1+ko03040//Spliceosome;K12862//pleiotropic regulator 1+ko03040//Spliceosome;K12862//pleiotropic regulator 1+ko03040//Spliceosome;K12862//pleiotropic regulator 1+ko03040//Spliceosome;K12862//pleiotropic regulator 1+ko03040//Spliceosome	XM_027364001.1 PREDICTED: Penaeus vannamei pleiotropic regulator 1-like (LOC113812169), mRNA	pleiotropic regulator 1-like [Penaeus vannamei]	WD domain, G-beta repeat	[A] KOG0285 Pleiotropic regulator 1	Pleiotropic regulator 1 OS=Homo sapiens OX=9606 GN=PLRG1 PE=1 SV=1
Unigene12920_All	0.83	3.13	1.914979416	0.000385313	4.68E-05		K02184//formin 2+ko04320//Dorso-ventral axis formation;K02184//formin 2+ko04320//Dorso-ventral axis formation;K02184//formin 2+ko04320//Dorso-ventral axis formation;K12567//titin [EC:2.7.11.1]+ko05414//Dilated cardiomyopathy (DCM)+ko05410//Hypertrophic cardiomyopathy (HCM);K02184//formin 2+ko04320//Dorso-ventral axis formation	XM_027380334.1 PREDICTED: Penaeus vannamei msx2-interacting protein-like (LOC113827451), mRNA	hypothetical protein C7M84_021235 [Penaeus vannamei]		[T] KOG1187 Serine/threonine protein kinase	Lysine-specific demethylase 6B OS=Mus musculus OX=10090 GN=Kdm6b PE=1 SV=1	GO:0046872//metal ion binding
Unigene5620_All	13.86	52.21	1.913398901	1.17E-24	2.59E-26
CL1269.Contig2_All	14.53	54.69	1.912242359	1.28E-241	1.67E-244			XM_027358233.1 PREDICTED: Penaeus vannamei syndecan-3-like (LOC113807065), mRNA		Intrinsic membrane protein PufX		Probable serine/threonine-protein kinase clkA OS=Dictyostelium discoideum OX=44689 GN=clkA PE=3 SV=1
Unigene17462_All	2.78	10.43	1.90758237	8.91E-06	7.97E-07			XM_027352307.1 PREDICTED: Penaeus vannamei uncharacterized LOC113801883 (LOC113801883), transcript variant X2, mRNA	uncharacterized protein LOC113801883 isoform X1 [Penaeus vannamei]				GO:0016021//integral component of membrane
CL1130.Contig5_All	6.66	24.92	1.903709986	2.01E-48	2.05E-50		K04364//growth factor receptor-binding protein 2+ko04630//Jak-STAT signaling pathway+ko05223//Non-small cell lung cancer+ko05226//Gastric cancer+ko05225//Hepatocellular carcinoma+ko04320//Dorso-ventral axis formation+ko04510//Focal adhesion+ko04072//Phospholipase D signaling pathway+ko01521//EGFR tyrosine kinase inhibitor resistance+ko01522//Endocrine resistance+ko04917//Prolactin signaling pathw…	XM_027369627.1 PREDICTED: Penaeus vannamei protein enhancer of sevenless 2B-like (LOC113817579), transcript variant X6, mRNA	SH2 domain [Trinorchestia longiramus]	SH3 domain	[T] KOG3601 Adaptor protein GRB2, contains SH2 and SH3 domains	Protein E(sev)2B OS=Drosophila simulans OX=7240 GN=drk PE=3 SV=1	GO:0005654//nucleoplasm;GO:0005654//nucleoplasm
CL2783.Contig2_All	3.49	13.01	1.898322021	4.67E-87	2.28E-89		K11488//polycomb group RING finger protein 3+ko04550//Signaling pathways regulating pluripotency of stem cells	XM_027378484.1 PREDICTED: Penaeus vannamei putative uncharacterized protein DDB_G0282133 (LOC113825637), mRNA	putative uncharacterized protein DDB_G0282133 [Penaeus vannamei]	Nuclear cap-binding protein subunit 3	[S] KOG4483 Uncharacterized conserved protein	R3H and coiled-coil domain-containing protein 1 OS=Mus musculus OX=10090 GN=R3hcc1 PE=1 SV=3
CL314.Contig1_All	2.73	10.16	1.895927546	5.28E-05	5.43E-06			XM_027379877.1 PREDICTED: Penaeus vannamei transcriptional regulator ATRX homolog (LOC113826980), mRNA	transcriptional regulator ATRX homolog [Penaeus vannamei]
CL148.Contig3_All	0.58	2.15	1.890211854	7.33E-07	5.60E-08		K01681//aconitate hydratase [EC:4.2.1.3]+ko01200//Carbon metabolism+ko01230//Biosynthesis of amino acids+ko00020//Citrate cycle (TCA cycle)+ko01100//Metabolic pathways+ko01210//2-Oxocarboxylic acid metabolism+ko00630//Glyoxylate and dicarboxylate metabolism;K01681//aconitate hydratase [EC:4.2.1.3]+ko01200//Carbon metabolism+ko01230//Biosynthesis of amino acids+ko00020//Citrate cycle (TCA cycle)+k…	XM_027361834.1 PREDICTED: Penaeus vannamei cytoplasmic aconitate hydratase-like (LOC113810130), mRNA	iron regulatory protein [Eriocheir sinensis]	Aconitase family (aconitate hydratase)	[AJ] KOG0452 RNA-binding translational regulator IRP (aconitase superfamily)	Cytoplasmic aconitate hydratase OS=Homo sapiens OX=9606 GN=ACO1 PE=1 SV=3	GO:0005737//cytoplasm;GO:0010040//response to iron(II) ion;GO:0005737//cytoplasm;GO:0006879//cellular iron ion homeostasis;GO:0003994//aconitate hydratase activity;GO:0051539//4 iron, 4 sulfur cluster binding;GO:0006879//cellular iron ion homeostasis
CL993.Contig5_All	0.98	3.59	1.87313019	2.08E-11	9.69E-13		K07376//cGMP-dependent protein kinase 1 [EC:2.7.11.12]+ko04022//cGMP-PKG signaling pathway+ko04730//Long-term depression+ko04611//Platelet activation+ko04714//Thermogenesis+ko04713//Circadian entrainment+ko04540//Gap junction+ko04970//Salivary secretion+ko04270//Vascular smooth muscle contraction+ko04740//Olfactory transduction+ko04923//Regulation of lipolysis in adipocytes	LM993663.2 Plasmodium yoelii strain 17X genome assembly, chromosome: 9	putative ATP-dependent RNA helicase YTHDC2 [Penaeus vannamei]	Not1 N-terminal domain, CCR4-Not complex component			GO:0003964//RNA-directed DNA polymerase activity;GO:0004386//helicase activity;GO:0005524//ATP binding
CL278.Contig9_All	0.58	2.12	1.869939459	3.51E-11	1.67E-12		K13091//RNA-binding protein 39;K13091//RNA-binding protein 39;K13091//RNA-binding protein 39;K13091//RNA-binding protein 39;K13091//RNA-binding protein 39	XM_027380760.1 PREDICTED: Penaeus vannamei RNA-binding protein 39-like (LOC113827827), transcript variant X1, mRNA	RNA-binding protein 39-like [Penaeus vannamei] >XP_027236562.1 RNA-binding protein 39-like [Penaeus vannamei]	RNA recognition motif. (a.k.a. RRM, RBD, or RNP domain)	[K] KOG0147 Transcriptional coactivator CAPER (RRM superfamily)	RNA-binding protein 39 OS=Pongo abelii OX=9601 GN=RBM39 PE=2 SV=1	GO:0006397//mRNA processing;GO:0005634//nucleus;GO:0006397//mRNA processing;GO:0005634//nucleus;GO:0003723//RNA binding
CL354.Contig3_All	0.29	1.06	1.869939459	9.30E-08	6.30E-09	ARID	K07874//Ras-related protein Rab-1A+ko05134//Legionellosis;K07874//Ras-related protein Rab-1A+ko05134//Legionellosis;K07874//Ras-related protein Rab-1A+ko05134//Legionellosis;K07874//Ras-related protein Rab-1A+ko05134//Legionellosis;K07874//Ras-related protein Rab-1A+ko05134//Legionellosis	XM_027380256.1 PREDICTED: Penaeus vannamei protein split ends-like (LOC113827377), mRNA	protein split ends-like [Penaeus vannamei]	RBB1NT (NUC162) domain	[K] KOG2744 DNA-binding proteins Bright/BRCAA1/RBP1 and related proteins containing BRIGHT domain	AT-rich interactive domain-containing protein 4B OS=Mus musculus OX=10090 GN=Arid4b PE=1 SV=1	GO:0005634//nucleus;GO:0003677//DNA binding;GO:0005634//nucleus
CL1762.Contig1_All	2.79	10.18	1.867400534	2.21E-40	2.83E-42		K18038//tyrosine-protein phosphatase non-receptor type 9 [EC:3.1.3.48];K18038//tyrosine-protein phosphatase non-receptor type 9 [EC:3.1.3.48];K18038//tyrosine-protein phosphatase non-receptor type 9 [EC:3.1.3.48];K18038//tyrosine-protein phosphatase non-receptor type 9 [EC:3.1.3.48]	XM_027379899.1 PREDICTED: Penaeus vannamei tyrosine-protein phosphatase non-receptor type 9-like (LOC113827001), transcript variant X1, mRNA	tyrosine-protein phosphatase non-receptor type 9-like isoform X1 [Penaeus vannamei]	Protein-tyrosine phosphatase	[T] KOG4228 Protein tyrosine phosphatase	Tyrosine-protein phosphatase non-receptor type 9 OS=Rattus norvegicus OX=10116 GN=Ptpn9 PE=2 SV=1	GO:0004725//protein tyrosine phosphatase activity
CL1660.Contig1_All	0.64	2.33	1.864186145	3.04E-09	1.75E-10			XM_027367432.1 PREDICTED: Penaeus vannamei titin homolog (LOC113815336), mRNA	hypothetical protein C7M84_012785 [Penaeus vannamei]		[S] KOG4798 Uncharacterized conserved protein	MICOS complex subunit MIC27 OS=Caenorhabditis elegans OX=6239 GN=moma-1 PE=2 SV=1	GO:0061617//MICOS complex;GO:0061617//MICOS complex;GO:0061617//MICOS complex;GO:0042407//cristae formation
CL1028.Contig5_All	1.11	4.04	1.863795616	1.01E-20	2.64E-22
CL2902.Contig2_All	1.22	4.44	1.863678529	9.99E-29	1.86E-30		K02649//phosphoinositide-3-kinase regulatory subunit alpha/beta/delta+ko04360//Axon guidance+ko04024//cAMP signaling pathway+ko04140//Autophagy - animal+ko04630//Jak-STAT signaling pathway+ko04810//Regulation of actin cytoskeleton+ko05222//Small cell lung cancer+ko05223//Non-small cell lung cancer+ko05226//Gastric cancer+ko05225//Hepatocellular carcinoma+ko04510//Focal adhesion+ko04933//AGE-RAGE …	XM_027362260.1 PREDICTED: Penaeus vannamei phosphatidylinositol 3-kinase regulatory subunit alpha-like (LOC113810630), transcript variant X2, mRNA	hypothetical protein C7M84_008962 [Penaeus vannamei]	SH2 domain	[T] KOG4637 Adaptor for phosphoinositide 3-kinase	Phosphatidylinositol 3-kinase regulatory subunit alpha OS=Mus musculus OX=10090 GN=Pik3r1 PE=1 SV=2	GO:0035556//intracellular signal transduction;GO:0035556//intracellular signal transduction;GO:0035556//intracellular signal transduction;GO:0035556//intracellular signal transduction;GO:0046872//metal ion binding;GO:0035556//intracellular signal transduction
Unigene16099_All	1.03	3.74	1.860393933	2.18E-05	2.10E-06		K03250//translation initiation factor 3 subunit E+ko03013//RNA transport+ko05160//Hepatitis C	XM_027377903.1 PREDICTED: Penaeus vannamei ras-related protein Rab6 (LOC113825121), transcript variant X1, mRNA	uncharacterized protein LOC113803219 [Penaeus vannamei]				GO:0051056//regulation of small GTPase mediated signal transduction;GO:0016021//integral component of membrane;GO:0051056//regulation of small GTPase mediated signal transduction;GO:0005096//GTPase activator activity;GO:0051056//regulation of small GTPase mediated signal transduction;GO:0051056//regulation of small GTPase mediated signal transduction;GO:0051056//regulation of small GTPase mediate…
CL915.Contig1_All	1.92	6.97	1.860052345	0.000148726	1.66E-05			XM_027376383.1 PREDICTED: Penaeus vannamei uncharacterized LOC113823695 (LOC113823695), transcript variant X19, mRNA
CL1660.Contig6_All	2.86	10.37	1.858328842	2.03E-19	5.70E-21			XM_027367432.1 PREDICTED: Penaeus vannamei titin homolog (LOC113815336), mRNA	hypothetical protein C7M84_012785 [Penaeus vannamei]	Apolipoprotein O	[S] KOG4798 Uncharacterized conserved protein	MICOS complex subunit MIC27 OS=Caenorhabditis elegans OX=6239 GN=moma-1 PE=2 SV=1	GO:0042407//cristae formation;GO:0061617//MICOS complex;GO:0061617//MICOS complex;GO:0061617//MICOS complex
CL4149.Contig1_All	4.2	15.17	1.852759853	1.33E-65	9.57E-68			XM_027381582.1 PREDICTED: Penaeus vannamei 1-phosphatidylinositol 4,5-bisphosphate phosphodiesterase gamma-1-like (LOC113828575), mRNA
CL2222.Contig2_All	1.39	5.01	1.84972572	2.67E-20	7.16E-22		K06569//melanoma-associated antigen p97;K06569//melanoma-associated antigen p97;K06569//melanoma-associated antigen p97;K06569//melanoma-associated antigen p97	XM_027359278.1 PREDICTED: Penaeus vannamei transferrin-like (LOC113807950), mRNA	LOW QUALITY PROTEIN: transferrin-like [Penaeus vannamei]	Transferrin	[P] TWOG0508 Transferrin/Lactotransferrin	Transferrin OS=Blaberus discoidalis OX=6981 PE=1 SV=1	GO:0005576//extracellular region
CL4065.Contig2_All	2.12	7.64	1.849508373	5.24E-61	4.12E-63		K12076//disks large protein 1+ko04391//Hippo signaling pathway - fly+ko04390//Hippo signaling pathway+ko04660//T cell receptor signaling pathway+ko04530//Tight junction+ko05203//Viral carcinogenesis+ko05165//Human papillomavirus infection+ko05166//Human T-cell leukemia virus 1 infection;K12076//disks large protein 1+ko04391//Hippo signaling pathway - fly+ko04390//Hippo signaling pathway+ko04660//…	XM_027360783.1 PREDICTED: Penaeus vannamei disks large 1 tumor suppressor protein-like (LOC113809244), mRNA	LOW QUALITY PROTEIN: disks large 1 tumor suppressor protein-like [Penaeus vannamei]	Guanylate kinase	[F] KOG0708 Membrane-associated guanylate kinase MAGUK (contains PDZ, SH3, HOOK and GUK domains)	Disks large 1 tumor suppressor protein OS=Drosophila melanogaster OX=7227 GN=dlg1 PE=1 SV=2
CL3153.Contig2_All	1.28	4.6	1.845490051	4.30E-06	3.68E-07
CL3935.Contig3_All	1.39	4.99	1.843954933	3.16E-05	3.11E-06		K11468//YY1-associated factor 2;K11468//YY1-associated factor 2;K11468//YY1-associated factor 2;K11468//YY1-associated factor 2	XM_027373129.1 PREDICTED: Penaeus vannamei YY1-associated factor 2-like (LOC113820764), transcript variant X4, mRNA	YY1-associated factor 2-like isoform X2 [Penaeus vannamei] >XP_027228929.1 YY1-associated factor 2-like isoform X2 [Penaeus vannamei] >XP_027228930.1 YY1-associated factor 2-like isoform X2 [Penaeus vannamei] >ROT65071.1 hypothetical protein C7M84_016983 [Penaeus vannamei]	Yaf2/RYBP C-terminal binding motif	[K] KOG4477 RING1 interactor RYBP and related Zn-finger-containing proteins	YY1-associated factor 2 OS=Homo sapiens OX=9606 GN=YAF2 PE=1 SV=3	GO:0045893//positive regulation of transcription, DNA-templated;GO:0045893//positive regulation of transcription, DNA-templated;GO:0046872//metal ion binding;GO:0045893//positive regulation of transcription, DNA-templated;GO:0045893//positive regulation of transcription, DNA-templated;GO:0045893//positive regulation of transcription, DNA-templated
Unigene5041_All	2.52	9.04	1.842899039	4.30E-06	3.68E-07			XM_027379564.1 PREDICTED: Penaeus vannamei tubulin beta chain-like (LOC113826673), mRNA
CL733.Contig4_All	1.86	6.67	1.84238414	1.55E-37	2.16E-39			XM_027366189.1 PREDICTED: Penaeus vannamei uncharacterized LOC113814162 (LOC113814162), mRNA	uncharacterized protein LOC113814162 [Penaeus vannamei]	Family of unknown function (DUF5662)
CL98.Contig2_All	0.65	2.33	1.841818332	5.49E-11	2.65E-12	HMG	K11800//WD repeat-containing protein 22;K11800//WD repeat-containing protein 22;K11800//WD repeat-containing protein 22;K11800//WD repeat-containing protein 22;K11800//WD repeat-containing protein 22	XM_027363748.1 PREDICTED: Penaeus vannamei dentin sialophosphoprotein-like (LOC113811898), transcript variant X1, mRNA	DDB1- and CUL4-associated factor 5-like [Penaeus vannamei]	Proacrosin binding protein sp32	[R] KOG4227 WD40 repeat protein	DDB1- and CUL4-associated factor 5 OS=Homo sapiens OX=9606 GN=DCAF5 PE=1 SV=2
CL2243.Contig2_All	4.01	14.35	1.839376595	1.89E-05	1.78E-06
Unigene3850_All	1.21	4.32	1.836024265	0.000211349	2.43E-05		K05619//transglutaminase 1 [EC:2.3.2.13];K05619//transglutaminase 1 [EC:2.3.2.13];K05619//transglutaminase 1 [EC:2.3.2.13];K05619//transglutaminase 1 [EC:2.3.2.13]	XM_027379114.1 PREDICTED: Penaeus vannamei hemocyte protein-glutamine gamma-glutamyltransferase-like (LOC113826241), mRNA	hemocyte protein-glutamine gamma-glutamyltransferase-like [Penaeus vannamei]	Transglutaminase family	[V] TWOG0528 Blood coagulation factor XIIIa/Transglutaminase	Coagulation factor XIII A chain OS=Mus musculus OX=10090 GN=F13a1 PE=1 SV=3	GO:0046872//metal ion binding;GO:0018149//peptide cross-linking;GO:0018149//peptide cross-linking;GO:0003810//protein-glutamine gamma-glutamyltransferase activity
CL786.Contig1_All	1.33	4.74	1.833460813	5.89E-10	3.14E-11	PC4		XM_027377326.1 PREDICTED: Penaeus vannamei RNA polymerase II transcriptional coactivator KIWI-like (LOC113824578), transcript variant X3, mRNA	RNA polymerase II transcriptional coactivator KIWI-like [Penaeus vannamei] >XP_027233126.1 RNA polymerase II transcriptional coactivator KIWI-like [Penaeus vannamei] >XP_027233127.1 RNA polymerase II transcriptional coactivator KIWI-like [Penaeus vannamei] >XP_027233128.1 RNA polymerase II transcriptional coactivator KIWI-like [Penaeus vannamei] >ROT62777.1 hypothetical protein C7M84_019360 [Pena…	Transcriptional Coactivator p15 (PC4)	[K] KOG2712 Transcriptional coactivator	Activated RNA polymerase II transcriptional coactivator p15 OS=Gallus gallus OX=9031 GN=SUB1 PE=2 SV=1	GO:0006355//regulation of transcription, DNA-templated;GO:0006355//regulation of transcription, DNA-templated;GO:0006355//regulation of transcription, DNA-templated;GO:0003677//DNA binding;GO:0006355//regulation of transcription, DNA-templated
CL3220.Contig2_All	1.03	3.67	1.833135726	5.54E-08	3.64E-09	zf-MIZ	K04706//E3 SUMO-protein ligase PIAS1 [EC:2.3.2.-]+ko04630//Jak-STAT signaling pathway+ko04120//Ubiquitin mediated proteolysis+ko05160//Hepatitis C;K04706//E3 SUMO-protein ligase PIAS1 [EC:2.3.2.-]+ko04630//Jak-STAT signaling pathway+ko04120//Ubiquitin mediated proteolysis+ko05160//Hepatitis C;K04706//E3 SUMO-protein ligase PIAS1 [EC:2.3.2.-]+ko04630//Jak-STAT signaling pathway+ko04120//Ubiquitin …	MH238442.1 Penaeus japonicus protein inhibitor of activated STAT mRNA, complete cds	protein inhibitor of activated STAT [Penaeus japonicus]	PINIT domain	[K] KOG2169 Zn-finger transcription factor	E3 SUMO-protein ligase PIAS2 OS=Rattus norvegicus OX=10116 GN=Pias2 PE=1 SV=1	GO:0008270//zinc ion binding;GO:0016874//ligase activity
CL905.Contig3_All	1.06	3.77	1.830500259	0.0001487	1.66E-05			XM_027360972.1 PREDICTED: Penaeus vannamei uncharacterized LOC113809395 (LOC113809395), mRNA	hypothetical protein C7M84_025007 [Penaeus vannamei]	Myb/SANT-like DNA-binding domain			GO:0003676//nucleic acid binding
CL3040.Contig1_All	0.65	2.31	1.829381228	7.21E-06	6.40E-07		K21763//mitogen-activated protein kinase binding protein 1;K21763//mitogen-activated protein kinase binding protein 1;K21763//mitogen-activated protein kinase binding protein 1;K21763//mitogen-activated protein kinase binding protein 1;K21763//mitogen-activated protein kinase binding protein 1	XM_027363096.1 PREDICTED: Penaeus vannamei WD repeat-containing protein 62-like (LOC113811365), mRNA	Mitogen-activated protein kinase-binding protein 1 [Penaeus vannamei]	Spo0E like sporulation regulatory protein	[S] KOG1408 WD40 repeat protein	WD repeat-containing protein 62 OS=Homo sapiens OX=9606 GN=WDR62 PE=1 SV=4	GO:0016301//kinase activity
CL2049.Contig3_All	0.81	2.87	1.825056924	1.22E-05	1.12E-06		K01887//arginyl-tRNA synthetase [EC:6.1.1.19]+ko00970//Aminoacyl-tRNA biosynthesis;K01887//arginyl-tRNA synthetase [EC:6.1.1.19]+ko00970//Aminoacyl-tRNA biosynthesis;K01887//arginyl-tRNA synthetase [EC:6.1.1.19]+ko00970//Aminoacyl-tRNA biosynthesis;K01887//arginyl-tRNA synthetase [EC:6.1.1.19]+ko00970//Aminoacyl-tRNA biosynthesis;K01887//arginyl-tRNA synthetase [EC:6.1.1.19]+ko00970//Aminoacyl-tR…	XM_027369640.1 PREDICTED: Penaeus vannamei probable arginine--tRNA ligase, mitochondrial (LOC113817593), mRNA	probable arginine--tRNA ligase, mitochondrial [Penaeus vannamei]	tRNA synthetases class I (R)	[J] KOG1195 Arginyl-tRNA synthetase	Probable arginine--tRNA ligase, mitochondrial OS=Bos taurus OX=9913 GN=RARS2 PE=2 SV=1
Unigene15429_All	1.16	4.11	1.825013589	1.44E-07	1.00E-08	zf-C2H2	K09228//KRAB domain-containing zinc finger protein;K09228//KRAB domain-containing zinc finger protein;K09228//KRAB domain-containing zinc finger protein;K09228//KRAB domain-containing zinc finger protein;K09228//KRAB domain-containing zinc finger protein	XM_027375488.1 PREDICTED: Penaeus vannamei protein bric-a-brac 1-like (LOC113822944), transcript variant X3, mRNA	putative zinc finger protein 66 [Crassostrea virginica] >XP_022303386.1 putative zinc finger protein 66 [Crassostrea virginica]	Zinc finger, C2H2 type	[R] KOG1721 FOG: Zn-finger	Zinc finger protein 572 OS=Homo sapiens OX=9606 GN=ZNF572 PE=1 SV=1	GO:0003676//nucleic acid binding
Unigene8720_All	0.85	3.01	1.824228741	0.000915168	0.000120898		K02085//adenomatosis polyposis coli protein+ko04390//Hippo signaling pathway+ko04810//Regulation of actin cytoskeleton+ko05226//Gastric cancer+ko05225//Hepatocellular carcinoma+ko04550//Signaling pathways regulating pluripotency of stem cells+ko04310//Wnt signaling pathway+ko05217//Basal cell carcinoma+ko05213//Endometrial cancer+ko05210//Colorectal cancer+ko05200//Pathways in cancer+ko05206//Mic…	XM_027354972.1 PREDICTED: Penaeus vannamei adenomatous polyposis coli protein-like (LOC113804138), transcript variant X1, mRNA	putative adenomatous polyposis coli protein-like isoform X3 [Penaeus vannamei]	APC repeat	[TZ] KOG2122 Beta-catenin-binding protein APC, contains ARM repeats	Adenomatous polyposis coli protein 2 OS=Mus musculus OX=10090 GN=Apc2 PE=1 SV=1	GO:0030178//negative regulation of Wnt signaling pathway;GO:0030178//negative regulation of Wnt signaling pathway;GO:0030178//negative regulation of Wnt signaling pathway;GO:0016055//Wnt signaling pathway;GO:0016055//Wnt signaling pathway;GO:0016055//Wnt signaling pathway;GO:0016055//Wnt signaling pathway;GO:0030178//negative regulation of Wnt signaling pathway;GO:0030178//negative regulation of …
CL1720.Contig1_All	0.95	3.36	1.822461814	2.56E-06	2.11E-07	bHLH	K17696//DNA-binding protein inhibitor ID, other+ko04350//TGF-beta signaling pathway;K17696//DNA-binding protein inhibitor ID, other+ko04350//TGF-beta signaling pathway;K17696//DNA-binding protein inhibitor ID, other+ko04350//TGF-beta signaling pathway;K17696//DNA-binding protein inhibitor ID, other+ko04350//TGF-beta signaling pathway;K17696//DNA-binding protein inhibitor ID, other+ko04350//TGF-be…	XM_027373913.1 PREDICTED: Penaeus vannamei protein extra-macrochaetae-like (LOC113821424), mRNA	protein extra-macrochaetae-like [Penaeus vannamei]	Helix-loop-helix DNA-binding domain	[K] TWOG0524 Inhibitor of DNA binding 3, dominant negative helix-loop-helix protein	Protein extra-macrochaetae OS=Drosophila melanogaster OX=7227 GN=emc PE=1 SV=2	GO:0005737//cytoplasm;GO:0045892//negative regulation of transcription, DNA-templated;GO:0046983//protein dimerization activity;GO:0045892//negative regulation of transcription, DNA-templated;GO:0005634//nucleus;GO:0045892//negative regulation of transcription, DNA-templated;GO:0005737//cytoplasm;GO:0045892//negative regulation of transcription, DNA-templated;GO:0045892//negative regulation of tr…
CL1074.Contig2_All	0.71	2.5	1.816037165	0.000593658	7.54E-05		K10570//DNA excision repair protein ERCC-8+ko03420//Nucleotide excision repair+ko04120//Ubiquitin mediated proteolysis;K10570//DNA excision repair protein ERCC-8+ko03420//Nucleotide excision repair+ko04120//Ubiquitin mediated proteolysis;K10570//DNA excision repair protein ERCC-8+ko03420//Nucleotide excision repair+ko04120//Ubiquitin mediated proteolysis;K10570//DNA excision repair protein ERCC-8…	XM_027370899.1 PREDICTED: Penaeus vannamei DNA excision repair protein ERCC-8-like (LOC113818710), transcript variant X5, mRNA	DNA excision repair protein ERCC-8-like [Penaeus vannamei] >XP_027226697.1 DNA excision repair protein ERCC-8-like [Penaeus vannamei] >XP_027226698.1 DNA excision repair protein ERCC-8-like [Penaeus vannamei] >XP_027226699.1 DNA excision repair protein ERCC-8-like [Penaeus vannamei] >XP_027226700.1 DNA excision repair protein ERCC-8-like [Penaeus vannamei]	WD domain, G-beta repeat	[KL] KOG4283 Transcription-coupled repair protein CSA, contains WD40 domain	DNA excision repair protein ERCC-8 OS=Homo sapiens OX=9606 GN=ERCC8 PE=1 SV=1
Unigene611_All	1.15	4.04	1.812721432	0.000192334	2.20E-05		K07935//intraflagellar transport protein 22;K07935//intraflagellar transport protein 22;K07935//intraflagellar transport protein 22;K07935//intraflagellar transport protein 22;K07935//intraflagellar transport protein 22	XM_027366273.1 PREDICTED: Penaeus vannamei intraflagellar transport protein 22 homolog (LOC113814240), mRNA	intraflagellar transport protein 22 homolog [Penaeus vannamei] >ROT69876.1 putative intraflagellar transport protein 22-like [Penaeus vannamei]	Ras of Complex, Roc, domain of DAPkinase		Intraflagellar transport protein 22 homolog OS=Macaca fascicularis OX=9541 GN=IFT22 PE=2 SV=1	GO:0031514//motile cilium
CL1376.Contig1_All	1.37	4.81	1.811861001	0.000211384	2.43E-05		K15009//SH3 and multiple ankyrin repeat domains protein+ko04724//Glutamatergic synapse	AL844152.9 Zebrafish DNA sequence from clone DKEY-37L7 in linkage group 13, complete sequence	hypothetical protein M514_12221 [Trichuris suis]	Amino acid permease		Integrator complex subunit 5-like protein OS=Dictyostelium discoideum OX=44689 GN=DDB_G0279251 PE=3 SV=1	GO:0016021//integral component of membrane
Unigene8978_All	1.45	5.09	1.811612756	9.02E-07	6.96E-08
CL1581.Contig3_All	8.33	29.22	1.810567777	1.34E-24	3.00E-26		K03098//apolipoprotein D and lipocalin family protein;K03098//apolipoprotein D and lipocalin family protein;K03098//apolipoprotein D and lipocalin family protein;K03098//apolipoprotein D and lipocalin family protein;K03098//apolipoprotein D and lipocalin family protein	XR_003477542.1 PREDICTED: Penaeus vannamei crustacyanin-A1 subunit-like (LOC113824727), misc_RNA	crustacyanin-A1 subunit-like [Penaeus vannamei]	Lipocalin / cytosolic fatty-acid binding protein family		Crustacyanin-A1 subunit OS=Homarus gammarus OX=6707 PE=1 SV=1	GO:0031409//pigment binding
Unigene10964_All	2.33	8.17	1.810006123	0.000547323	6.84E-05	ARID	K17095//annexin A7/11;K03345//sentrin-specific protease 2 (axin associating molecule) [EC:3.4.22.68]+ko04310//Wnt signaling pathway+ko03013//RNA transport;K13098//RNA-binding protein FUS+ko05202//Transcriptional misregulation in cancer;K05769//Rho guanine nucleotide exchange factor 4/29+ko04810//Regulation of actin cytoskeleton		hypothetical protein EZS28_029918, partial [Streblomastix strix]	UvrD-like helicase C-terminal domain		AT-rich interactive domain-containing protein 1A OS=Mus musculus OX=10090 GN=Arid1a PE=1 SV=1
CL2489.Contig1_All	0.87	3.05	1.809721937	0.000355219	4.28E-05
CL2930.Contig1_All	33.49	117.27	1.808031709	1.62E-62	1.23E-64		K03098//apolipoprotein D and lipocalin family protein;K18271//retinol-binding protein 4;K18271//retinol-binding protein 4;K03098//apolipoprotein D and lipocalin family protein;K18271//retinol-binding protein 4	XM_027377486.1 PREDICTED: Penaeus vannamei crustacyanin-A2 subunit-like (LOC113824722), mRNA	crustacyanin-A2 subunit-like [Penaeus vannamei] >ROT62662.1 crustacyanin subunit A [Penaeus vannamei]	Lipocalin-like domain	[M] KOG4824 Apolipoprotein D/Lipocalin	Crustacyanin-A2 subunit OS=Homarus gammarus OX=6707 PE=1 SV=1	GO:0031409//pigment binding
CL1458.Contig2_All	0.56	1.96	1.807354922	5.83E-07	4.40E-08		K05766//protein phosphatase slingshot [EC:3.1.3.16 3.1.3.48]+ko04360//Axon guidance+ko04810//Regulation of actin cytoskeleton;K11124//protein SMG6 [EC:3.1.-.-]+ko03015//mRNA surveillance pathway;K05766//protein phosphatase slingshot [EC:3.1.3.16 3.1.3.48]+ko04360//Axon guidance+ko04810//Regulation of actin cytoskeleton;K05766//protein phosphatase slingshot [EC:3.1.3.16 3.1.3.48]+ko04360//Axon gui…	XM_027357697.1 PREDICTED: Penaeus vannamei uncharacterized LOC113806546 (LOC113806546), transcript variant X2, mRNA	uncharacterized protein LOC113806546 isoform X2 [Penaeus vannamei]	Protein of unknown function (DUF3645)			GO:0008138//protein tyrosine/serine/threonine phosphatase activity;GO:0004725//protein tyrosine phosphatase activity
CL1568.Contig3_All	0.34	1.19	1.807354922	1.12E-05	1.02E-06		K18747//protein sex-lethal;K18747//protein sex-lethal;K18747//protein sex-lethal;K18747//protein sex-lethal;K18747//protein sex-lethal	XM_027354032.1 PREDICTED: Penaeus vannamei sex-lethal homolog (LOC113803286), mRNA	sex-lethal variant 1 [Penaeus vannamei]	RNA recognition motif. (a.k.a. RRM, RBD, or RNP domain)	[R] KOG0118 FOG: RRM domain	Sex-lethal homolog OS=Chrysomya rufifacies OX=45450 GN=SXL PE=2 SV=2	GO:0003723//RNA binding;GO:1990904//ribonucleoprotein complex
CL1250.Contig2_All	1.11	3.88	1.805496976	5.02E-18	1.51E-19		K08145//MFS transporter, SP family, solute carrier family 2 (facilitated glucose transporter), member 8;K08145//MFS transporter, SP family, solute carrier family 2 (facilitated glucose transporter), member 8;K08145//MFS transporter, SP family, solute carrier family 2 (facilitated glucose transporter), member 8	XM_027383759.1 PREDICTED: Penaeus vannamei facilitated trehalose transporter Tret1-like (LOC113830554), transcript variant X2, mRNA	facilitated trehalose transporter Tret1-like [Penaeus vannamei] >XP_027239560.1 facilitated trehalose transporter Tret1-like [Penaeus vannamei] >XP_027239561.1 facilitated trehalose transporter Tret1-like [Penaeus vannamei] >ROT83225.1 hypothetical protein C7M84_023587 [Penaeus vannamei]	Sugar (and other) transporter	[R] KOG0254 Predicted transporter (major facilitator superfamily)	Facilitated trehalose transporter Tret1 OS=Drosophila pseudoobscura pseudoobscura OX=46245 GN=Tret1 PE=3 SV=3	GO:0008643//carbohydrate transport;GO:0022857//transmembrane transporter activity;GO:0016021//integral component of membrane
CL149.Contig7_All	0.43	1.5	1.802553936	1.63E-12	6.97E-14		K20163//DENN domain-containing protein 4;K20163//DENN domain-containing protein 4;K20163//DENN domain-containing protein 4;K20163//DENN domain-containing protein 4;K20163//DENN domain-containing protein 4	XM_027369902.1 PREDICTED: Penaeus vannamei C-myc promoter-binding protein-like (LOC113817803), partial mRNA	C-myc promoter-binding protein [Armadillidium vulgare]	dDENN domain	[T] KOG2127 Calmodulin-binding protein CRAG, contains DENN domain	DENN domain-containing protein 4C OS=Homo sapiens OX=9606 GN=DENND4C PE=1 SV=3
CL1829.Contig1_All	1.72	5.99	1.800147438	1.21E-07	8.37E-09			XM_027351469.1 PREDICTED: Penaeus vannamei uncharacterized LOC113800661 (LOC113800661), mRNA	putative ectonucleoside triphosphate diphosphohydrolase 2-like isoform X3 [Penaeus vannamei]				GO:0016787//hydrolase activity;GO:0005576//extracellular region;GO:0005184//neuropeptide hormone activity;GO:0005184//neuropeptide hormone activity;GO:0016021//integral component of membrane;GO:0005524//ATP binding
Unigene292_All	0.98	3.41	1.798918085	1.03E-05	9.24E-07			XM_027361326.1 PREDICTED: Penaeus vannamei uncharacterized LOC113809666 (LOC113809666), transcript variant X3, mRNA
Unigene7174_All	1.22	4.24	1.797183117	2.33E-06	1.92E-07			XM_027360169.1 PREDICTED: Penaeus vannamei thiamin pyrophosphokinase 1-like (LOC113808694), transcript variant X3, mRNA
Unigene25433_All	1.01	3.51	1.797115738	0.000322616	3.87E-05		K20017//Bcl-2 family protein+ko04214//Apoptosis - fly+ko04215//Apoptosis - multiple species;K20017//Bcl-2 family protein+ko04214//Apoptosis - fly+ko04215//Apoptosis - multiple species;K20017//Bcl-2 family protein+ko04214//Apoptosis - fly+ko04215//Apoptosis - multiple species;K20017//Bcl-2 family protein+ko04214//Apoptosis - fly+ko04215//Apoptosis - multiple species;K20017//Bcl-2 family protein+ko…	XM_027354848.1 PREDICTED: Penaeus vannamei bcl-2-related ovarian killer protein-like (LOC113804020), mRNA	Bcl-2-related ovarian killer protein [Scylla paramamosain]	Apoptosis regulator proteins, Bcl-2 family	[T] KOG4728 Anti-apoptotic Bcl-2 family proteins, prevent opening of mitochondrial porin channel	Bcl-2-related ovarian killer protein homolog A OS=Danio rerio OX=7955 GN=boka PE=2 SV=1	GO:0042981//regulation of apoptotic process;GO:0042981//regulation of apoptotic process;GO:0042981//regulation of apoptotic process;GO:0016021//integral component of membrane
CL2700.Contig4_All	21.4	74.31	1.795945573	6.15E-223	8.49E-226		K03783//purine-nucleoside phosphorylase [EC:2.4.2.1]+ko00230//Purine metabolism+ko00240//Pyrimidine metabolism+ko00760//Nicotinate and nicotinamide metabolism+ko01100//Metabolic pathways;K03783//purine-nucleoside phosphorylase [EC:2.4.2.1]+ko00230//Purine metabolism+ko00240//Pyrimidine metabolism+ko00760//Nicotinate and nicotinamide metabolism+ko01100//Metabolic pathways;K03783//purine-nucleoside…	XM_027371184.1 PREDICTED: Penaeus vannamei purine nucleoside phosphorylase-like (LOC113818958), transcript variant X4, mRNA	purine nucleoside phosphorylase-like isoform X2 [Penaeus vannamei]	Phosphorylase superfamily	[F] KOG3984 Purine nucleoside phosphorylase	Purine nucleoside phosphorylase OS=Mus musculus OX=10090 GN=Pnp PE=1 SV=2	GO:0004731//purine-nucleoside phosphorylase activity;GO:0009116//nucleoside metabolic process;GO:0009116//nucleoside metabolic process
Unigene17437_All	1.32	4.58	1.794809669	4.43E-05	4.49E-06		K17751//myosin heavy chain 6/7+ko05416//Viral myocarditis+ko04261//Adrenergic signaling in cardiomyocytes+ko04260//Cardiac muscle contraction;K17751//myosin heavy chain 6/7+ko05416//Viral myocarditis+ko04261//Adrenergic signaling in cardiomyocytes+ko04260//Cardiac muscle contraction;K17751//myosin heavy chain 6/7+ko05416//Viral myocarditis+ko04261//Adrenergic signaling in cardiomyocytes+ko04260//…	XR_003476717.1 PREDICTED: Penaeus vannamei myosin heavy chain, muscle-like (LOC113816524), misc_RNA	myosin heavy chain type 2 [Penaeus vannamei]	Myosin tail	[Z] KOG0161 Myosin class II heavy chain	Myosin heavy chain, muscle OS=Drosophila melanogaster OX=7227 GN=Mhc PE=1 SV=4	GO:0003774//motor activity;GO:0051015//actin filament binding;GO:0016459//myosin complex;GO:0016459//myosin complex;GO:0005524//ATP binding;GO:0016459//myosin complex
CL450.Contig2_All	0.62	2.15	1.793996539	3.16E-05	3.11E-06			XM_027361452.1 PREDICTED: Penaeus vannamei programmed cell death protein 10-like (LOC113809779), mRNA	Programmed cell death protein 10 [Penaeus vannamei]
CL1743.Contig3_All	3.58	12.4	1.792308628	2.78E-06	2.31E-07			XM_027354816.1 PREDICTED: Penaeus vannamei ryncolin-1-like (LOC113803998), mRNA	ryncolin-1-like [Penaeus vannamei] >APU53504.1 fibrinogen-related protein 2 [Penaeus vannamei]
Unigene14337_All	0.82	2.83	1.787106238	0.000192366	2.20E-05		K01080//phosphatidate phosphatase [EC:3.1.3.4]+ko04072//Phospholipase D signaling pathway+ko00600//Sphingolipid metabolism+ko04666//Fc gamma R-mediated phagocytosis+ko04975//Fat digestion and absorption+ko00564//Glycerophospholipid metabolism+ko00565//Ether lipid metabolism+ko00561//Glycerolipid metabolism+ko05231//Choline metabolism in cancer+ko01100//Metabolic pathways;K01080//phosphatidate pho…	XM_027383173.1 PREDICTED: Penaeus vannamei phospholipid phosphatase 2-like (LOC113830003), mRNA	phospholipid phosphatase 2-like [Penaeus vannamei]	PAP2 superfamily	[I] KOG3030 Lipid phosphate phosphatase and related enzymes of the PAP2 family	Phospholipid phosphatase 1 OS=Mus musculus OX=10090 GN=Plpp1 PE=1 SV=1	GO:0006644//phospholipid metabolic process;GO:0016021//integral component of membrane;GO:0006644//phospholipid metabolic process;GO:0008195//phosphatidate phosphatase activity
Unigene16611_All	2.78	9.58	1.784940773	2.51E-08	1.59E-09			XR_003475688.1 PREDICTED: Penaeus vannamei uncharacterized LOC113805506 (LOC113805506), ncRNA
Unigene16790_All	1.33	4.57	1.78076792	6.08E-06	5.28E-07		K01623//fructose-bisphosphate aldolase, class I [EC:4.1.2.13]+ko01200//Carbon metabolism+ko00010//Glycolysis / Gluconeogenesis+ko01230//Biosynthesis of amino acids+ko00051//Fructose and mannose metabolism+ko00030//Pentose phosphate pathway+ko01100//Metabolic pathways;K01623//fructose-bisphosphate aldolase, class I [EC:4.1.2.13]+ko01200//Carbon metabolism+ko00010//Glycolysis / Gluconeogenesis+ko01…	XM_027359746.1 PREDICTED: Penaeus vannamei fructose-bisphosphate aldolase-like (LOC113808336), mRNA	fructose 1,6-biphosphate-aldolase A [Penaeus vannamei]	Fructose-bisphosphate aldolase class-I	[G] KOG1557 Fructose-biphosphate aldolase	Fructose-bisphosphate aldolase OS=Drosophila melanogaster OX=7227 GN=Ald1 PE=1 SV=5	GO:0004332//fructose-bisphosphate aldolase activity;GO:0006096//glycolytic process;GO:0006096//glycolytic process
CL852.Contig2_All	2.4	8.22	1.776103988	2.61E-05	2.56E-06
CL3893.Contig2_All	1.77	6.05	1.773185782	5.68E-09	3.36E-10		K13249//translocon-associated protein subunit alpha+ko04141//Protein processing in endoplasmic reticulum;K13249//translocon-associated protein subunit alpha+ko04141//Protein processing in endoplasmic reticulum;K13249//translocon-associated protein subunit alpha+ko04141//Protein processing in endoplasmic reticulum;K13249//translocon-associated protein subunit alpha+ko04141//Protein processing in e…	XM_027352485.1 PREDICTED: Penaeus vannamei translocon-associated protein subunit alpha-like (LOC113802009), mRNA	Translocon-associated protein subunit alpha [Penaeus vannamei]	Translocon-associated protein (TRAP), alpha subunit	[U] KOG1631 Translocon-associated complex TRAP, alpha subunit	Translocon-associated protein subunit alpha OS=Bos taurus OX=9913 GN=SSR1 PE=2 SV=1	GO:0005789//endoplasmic reticulum membrane;GO:0016021//integral component of membrane
CL905.Contig8_All	0.67	2.29	1.773114598	9.80E-07	7.64E-08	zf-C2H2	K09228//KRAB domain-containing zinc finger protein;K09228//KRAB domain-containing zinc finger protein	XM_027352663.1 PREDICTED: Penaeus vannamei uncharacterized LOC113802143 (LOC113802143), mRNA	uncharacterized protein LOC113802143 [Penaeus vannamei]	Myb/SANT-like DNA-binding domain			GO:0003676//nucleic acid binding
CL3133.Contig2_All	1.73	5.9	1.769942917	2.05E-07	1.45E-08			XM_027368042.1 PREDICTED: Penaeus vannamei zinc transporter ZIP1-like (LOC113816022), mRNA
Unigene453_All	1.51	5.13	1.764410276	5.18E-09	3.04E-10		K08743//ectonucleotide pyrophosphatase/phosphodiesterase family member 6 [EC:3.1.4.-]+ko00565//Ether lipid metabolism;K08743//ectonucleotide pyrophosphatase/phosphodiesterase family member 6 [EC:3.1.4.-]+ko00565//Ether lipid metabolism;K08743//ectonucleotide pyrophosphatase/phosphodiesterase family member 6 [EC:3.1.4.-]+ko00565//Ether lipid metabolism;K08743//ectonucleotide pyrophosphatase/phosph…	XM_027353575.1 PREDICTED: Penaeus vannamei ectonucleotide pyrophosphatase/phosphodiesterase family member 6-like (LOC113802922), mRNA	ectonucleotide pyrophosphatase/phosphodiesterase family member 6-like [Penaeus vannamei]	Type I phosphodiesterase / nucleotide pyrophosphatase	[R] KOG2645 Type I phosphodiesterase/nucleotide pyrophosphatase	Glycerophosphocholine cholinephosphodiesterase ENPP6 OS=Danio rerio OX=7955 GN=enpp6 PE=2 SV=1	GO:0003824//catalytic activity
CL1153.Contig3_All	1.75	5.94	1.763108009	4.50E-33	7.20E-35		K22615//NLR family CARD domain containing 5;K22615//NLR family CARD domain containing 5;K22615//NLR family CARD domain containing 5;K22614//NLR family CARD domain-containing protein 3;K22614//NLR family CARD domain-containing protein 3	XM_027373446.1 PREDICTED: Penaeus vannamei uncharacterized LOC113821017 (LOC113821017), transcript variant X1, mRNA	uncharacterized protein LOC113821017 [Penaeus vannamei] >XP_027229248.1 uncharacterized protein LOC113821017 [Penaeus vannamei] >XP_027229249.1 uncharacterized protein LOC113821017 [Penaeus vannamei]	NACHT domain	[S] LSE0038 H Uncharacterized protein, contains PAAD/DAPIN/pyrin domain and LRR repeats	NACHT, LRR and PYD domains-containing protein 10 OS=Mus musculus OX=10090 GN=Nlrp10 PE=1 SV=1
Unigene11200_All	1.04	3.52	1.7589919	4.00E-05	4.03E-06
CL2561.Contig4_All	3.23	10.93	1.758687331	7.16E-12	3.23E-13			XM_027356042.1 PREDICTED: Penaeus vannamei uncharacterized LOC113805115 (LOC113805115), mRNA	uncharacterized protein LOC113805115 [Penaeus vannamei]	Domain of unknown function (DUF834)
Unigene16582_All	2.01	6.8	1.758339245	1.34E-08	8.27E-10		K17277//epidermal growth factor receptor kinase substrate 8;K17277//epidermal growth factor receptor kinase substrate 8;K17277//epidermal growth factor receptor kinase substrate 8;K17277//epidermal growth factor receptor kinase substrate 8;K17277//epidermal growth factor receptor kinase substrate 8		hypothetical protein C7M84_006400 [Penaeus vannamei]	SH3 domain	[T] KOG3557 Epidermal growth factor receptor kinase substrate	Epidermal growth factor receptor kinase substrate 8-like protein 3 OS=Homo sapiens OX=9606 GN=EPS8L3 PE=1 SV=2	GO:0016021//integral component of membrane;GO:0005337//nucleoside transmembrane transporter activity
CL1128.Contig1_All	0.58	1.96	1.756728849	2.51E-08	1.59E-09	zf-C2H2	K01965//propionyl-CoA carboxylase alpha chain [EC:6.4.1.3]+ko01200//Carbon metabolism+ko00640//Propanoate metabolism+ko00280//Valine, leucine and isoleucine degradation+ko01100//Metabolic pathways+ko00630//Glyoxylate and dicarboxylate metabolism;K01965//propionyl-CoA carboxylase alpha chain [EC:6.4.1.3]+ko01200//Carbon metabolism+ko00640//Propanoate metabolism+ko00280//Valine, leucine and isoleuc…	XM_027358528.1 PREDICTED: Penaeus vannamei propionyl-CoA carboxylase alpha chain, mitochondrial-like (LOC113807294), mRNA	propionyl-CoA carboxylase alpha chain, mitochondrial-like [Penaeus vannamei] >ROT75223.1 Propionyl-CoA carboxylase alpha chain, mitochondrial [Penaeus vannamei]	Carbamoyl-phosphate synthase L chain, ATP binding domain	[IE] KOG0238 3-Methylcrotonyl-CoA carboxylase, biotin-containing subunit/Propionyl-CoA carboxylase, alpha chain/Acetyl-CoA carboxylase, biotin carboxylase subunit	Propionyl-CoA carboxylase alpha chain, mitochondrial OS=Mus musculus OX=10090 GN=Pcca PE=1 SV=2	GO:0016874//ligase activity;GO:0005524//ATP binding;GO:0046872//metal ion binding
CL143.Contig4_All	5.11	17.23	1.753527505	6.10E-61	4.80E-63		K14943//muscleblind;K14943//muscleblind;K14943//muscleblind;K14943//muscleblind;K10955//mucin-2+ko05226//Gastric cancer+ko05146//Amoebiasis	XM_027364597.1 PREDICTED: Penaeus vannamei muscleblind-like protein (LOC113812678), mRNA	mucin-2-like [Maylandia zebra]		[R] KOG1520 Predicted alkaloid synthase/Surface mucin Hemomucin	Salivary glue protein Sgs-3 OS=Drosophila yakuba OX=7245 GN=Sgs3 PE=2 SV=3	GO:0008061//chitin binding;GO:0005576//extracellular region
CL2577.Contig3_All	0.89	3	1.75308526	7.36E-14	2.85E-15			XR_003475435.1 PREDICTED: Penaeus vannamei uncharacterized LOC113802589 (LOC113802589), ncRNA
Unigene13380_All	1.66	5.57	1.746494086	2.60E-07	1.86E-08		K14327//regulator of nonsense transcripts 2+ko03013//RNA transport+ko03015//mRNA surveillance pathway;K17418//large subunit ribosomal protein L37;K19703//4-hydroxysphinganine ceramide fatty acyl 2-hydroxylase [EC:1.14.18.6];K19703//4-hydroxysphinganine ceramide fatty acyl 2-hydroxylase [EC:1.14.18.6]	XM_027365564.1 PREDICTED: Penaeus vannamei cytochrome b5-like (LOC113813557), mRNA	cytochrome b5-like [Penaeus vannamei]	Cytochrome b5-like Heme/Steroid binding domain	[C] KOG0537 Cytochrome b5	Cytochrome b5 OS=Drosophila melanogaster OX=7227 GN=Cyt-b5 PE=2 SV=1	GO:0046872//metal ion binding;GO:0020037//heme binding
Unigene1610_All	6.53	21.86	1.743138504	5.23E-19	1.50E-20			XM_027354760.1 PREDICTED: Penaeus vannamei neuroparsin-A-like (LOC113803948), mRNA	neuroparsin-A-like [Penaeus vannamei]	Neuroparsin		Neuroparsin-A OS=Locusta migratoria OX=7004 PE=1 SV=3
Unigene11943_All	1.53	5.1	1.736965594	1.13E-06	8.87E-08			XM_027369551.1 PREDICTED: Penaeus vannamei uncharacterized LOC113817480 (LOC113817480), transcript variant X1, mRNA	uncharacterized protein LOC113817480 isoform X1 [Penaeus vannamei] >ROT79836.1 hypothetical protein C7M84_001460 [Penaeus vannamei]	Mab-21 protein
Unigene243_All	3.92	13.05	1.735124247	4.25E-29	7.81E-31		K04209//neuropeptide F receptor	XM_027377834.1 PREDICTED: Penaeus vannamei uncharacterized LOC113825056 (LOC113825056), mRNA	uncharacterized protein LOC113825056 [Penaeus vannamei]	7 transmembrane receptor (rhodopsin family)			GO:0016021//integral component of membrane
Unigene15530_All	0.67	2.23	1.734810709	0.000741402	9.66E-05
Unigene14873_All	3.96	13.18	1.734778035	3.55E-16	1.19E-17		K04593//adhesion G protein-coupled receptor L2;K04593//adhesion G protein-coupled receptor L2;K04595//adhesion G protein-coupled receptor L4;K04595//adhesion G protein-coupled receptor L4;K04595//adhesion G protein-coupled receptor L4	XM_027365495.1 PREDICTED: Penaeus vannamei adhesion G protein-coupled receptor L4-like (LOC113813501), transcript variant X2, mRNA	adhesion G protein-coupled receptor L4-like isoform X1 [Penaeus vannamei]	7 transmembrane receptor (Secretin family)	[T] KOG4193 G protein-coupled receptors	Adhesion G protein-coupled receptor L4 OS=Homo sapiens OX=9606 GN=ADGRL4 PE=1 SV=3	GO:0007166//cell surface receptor signaling pathway;GO:0007166//cell surface receptor signaling pathway;GO:0007166//cell surface receptor signaling pathway;GO:0004930//G protein-coupled receptor activity;GO:0007166//cell surface receptor signaling pathway;GO:0016021//integral component of membrane;GO:0007166//cell surface receptor signaling pathway
CL1312.Contig3_All	4.5	14.97	1.734077315	7.22E-25	1.59E-26		K17776//metaxin;K17776//metaxin;K17776//metaxin;K17776//metaxin;K17776//metaxin	XM_027359898.1 PREDICTED: Penaeus vannamei failed axon connections-like (LOC113808479), mRNA	failed axon connections-like [Penaeus vannamei]	Glutathione S-transferase, C-terminal domain	[T] KOG4244 Failed axon connections (fax) protein/glutathione S-transferase-like protein	Failed axon connections OS=Drosophila melanogaster OX=7227 GN=fax PE=1 SV=1
Unigene13987_All	1.7	5.64	1.730160416	9.03E-08	6.12E-09					GGL domain
Unigene17274_All	8.12	26.93	1.729662597	4.65E-17	1.49E-18			XM_027355548.1 PREDICTED: Penaeus vannamei sodium-coupled monocarboxylate transporter 1-like (LOC113804663), mRNA	hypothetical protein GW7_15101, partial [Heterocephalus glaber]				GO:0016021//integral component of membrane
CL1872.Contig1_All	1.79	5.93	1.728072517	3.38E-42	4.13E-44		K05096//FMS-like tyrosine kinase 1 [EC:2.7.10.1]+ko04510//Focal adhesion+ko05323//Rheumatoid arthritis+ko05202//Transcriptional misregulation in cancer+ko04151//PI3K-Akt signaling pathway+ko04010//MAPK signaling pathway+ko04014//Ras signaling pathway+ko04015//Rap1 signaling pathway+ko04066//HIF-1 signaling pathway;K05096//FMS-like tyrosine kinase 1 [EC:2.7.10.1]+ko04510//Focal adhesion+ko05323//R…	XM_027354435.1 PREDICTED: Penaeus vannamei vascular endothelial growth factor receptor 2-like (LOC113803634), transcript variant X2, mRNA	vascular endothelial growth factor receptor 1-like isoform X1 [Penaeus vannamei] >XP_027210236.1 vascular endothelial growth factor receptor 1-like isoform X1 [Penaeus vannamei]	Protein tyrosine and serine/threonine kinase	[T] KOG0200 Fibroblast/platelet-derived growth factor receptor and related receptor tyrosine kinases	Vascular endothelial growth factor receptor 1 OS=Gallus gallus OX=9031 GN=FLT1 PE=2 SV=1	GO:0004714//transmembrane receptor protein tyrosine kinase activity;GO:0016021//integral component of membrane;GO:0004714//transmembrane receptor protein tyrosine kinase activity;GO:0005524//ATP binding
CL448.Contig4_All	0.27	0.89	1.720845929	1.45E-12	6.19E-14		K19947//F-actin monooxygenase [EC:1.14.13.225];K19947//F-actin monooxygenase [EC:1.14.13.225];K19947//F-actin monooxygenase [EC:1.14.13.225];K19947//F-actin monooxygenase [EC:1.14.13.225];K19947//F-actin monooxygenase [EC:1.14.13.225]	XM_027353545.1 PREDICTED: Penaeus vannamei protein-methionine sulfoxide oxidase mical3a-like (LOC113802897), mRNA	putative protein-methionine sulfoxide oxidase Mical isoform X2 [Penaeus vannamei]	Bivalent Mical/EHBP Rab binding domain	[TZ] KOG1700 Regulatory protein MLP and related LIM proteins	Protein-methionine sulfoxide oxidase mical3b OS=Danio rerio OX=7955 GN=mical3b PE=3 SV=2	GO:0046872//metal ion binding;GO:0016709//oxidoreductase activity, acting on paired donors, with incorporation or reduction of molecular oxygen, NAD(P)H as one donor, and incorporation of one atom of oxygen;GO:0006887//exocytosis;GO:0006887//exocytosis;GO:0017137//Rab GTPase binding
CL10.Contig3_All	0.48	1.58	1.718818247	5.34E-08	3.51E-09		K10421//CAP-Gly domain-containing linker protein 1+ko04150//mTOR signaling pathway;K10421//CAP-Gly domain-containing linker protein 1+ko04150//mTOR signaling pathway;K10421//CAP-Gly domain-containing linker protein 1+ko04150//mTOR signaling pathway;K10421//CAP-Gly domain-containing linker protein 1+ko04150//mTOR signaling pathway;K10421//CAP-Gly domain-containing linker protein 1+ko04150//mTOR si…	XM_027373573.1 PREDICTED: Penaeus vannamei CAP-Gly domain-containing linker protein 1-like (LOC113821126), mRNA	CAP-Gly domain-containing linker protein 1-like [Penaeus vannamei]	CAP-Gly domain	[ZR] KOG4568 Cytoskeleton-associated protein and related proteins	CAP-Gly domain-containing linker protein 1 OS=Mus musculus OX=10090 GN=Clip1 PE=1 SV=1
CL131.Contig2_All	14.31	46.8	1.709484858	2.57E-242	3.25E-245		K10955//mucin-2+ko05226//Gastric cancer+ko05146//Amoebiasis;K10955//mucin-2+ko05226//Gastric cancer+ko05146//Amoebiasis;K21125//mucin-5AC+ko04657//IL-17 signaling pathway;K17298//mucin-13	XM_027381537.1 PREDICTED: Penaeus vannamei uncharacterized LOC113828542 (LOC113828542), transcript variant X3, mRNA	uncharacterized protein LOC113828542 isoform X1 [Penaeus vannamei] >XP_027237337.1 uncharacterized protein LOC113828542 isoform X1 [Penaeus vannamei] >XP_027237338.1 uncharacterized protein LOC113828542 isoform X1 [Penaeus vannamei] >XP_027237339.1 uncharacterized protein LOC113828542 isoform X1 [Penaeus vannamei] >XP_027237340.1 uncharacterized protein LOC113828542 isoform X1 [Penaeus vannamei] …	Axin-1 tankyrase binding domain	[PT] KOG3599 Ca2+-modulated nonselective cation channel polycystin	Location of vulva defective 1 OS=Caenorhabditis elegans OX=6239 GN=lov-1 PE=1 SV=4
CL1490.Contig5_All	1.93	6.3	1.706750981	3.98E-11	1.90E-12		K13172//serine/arginine repetitive matrix protein 2;K13172//serine/arginine repetitive matrix protein 2;K13172//serine/arginine repetitive matrix protein 2;K13172//serine/arginine repetitive matrix protein 2;K13172//serine/arginine repetitive matrix protein 2	XM_027350868.1 PREDICTED: Penaeus vannamei uncharacterized LOC113800144 (LOC113800144), transcript variant X1, mRNA	uncharacterized protein LOC113800144 isoform X1 [Penaeus vannamei]	Domain of unknown function (DUF4789)	[A] KOG4676 Splicing factor, arginine/serine-rich	Protamine OS=Phorcus turbinatus OX=43341 PE=1 SV=1	GO:0008017//microtubule binding;GO:0005524//ATP binding;GO:0007018//microtubule-based movement;GO:0003777//microtubule motor activity
CL689.Contig1_All	0.73	2.38	1.704993204	3.93E-07	2.90E-08		K04432//mitogen-activated protein kinase kinase 3 [EC:2.7.12.2]+ko05014//Amyotrophic lateral sclerosis (ALS)+ko04218//Cellular senescence+ko04912//GnRH signaling pathway+ko05170//Human immunodeficiency virus 1 infection+ko04668//TNF signaling pathway+ko04664//Fc epsilon RI signaling pathway+ko04714//Thermogenesis+ko05145//Toxoplasmosis+ko04620//Toll-like receptor signaling pathway+ko04624//Toll a…	XM_027357177.1 PREDICTED: Penaeus vannamei dual specificity mitogen-activated protein kinase kinase 6-like (LOC113806070), mRNA	dual specificity mitogen-activated protein kinase kinase 6-like [Penaeus vannamei]	Protein kinase domain	[T] KOG0984 Mitogen-activated protein kinase (MAPK) kinase MKK3/MKK6	Dual specificity mitogen-activated protein kinase kinase 6 OS=Mus musculus OX=10090 GN=Map2k6 PE=1 SV=1	GO:0004674//protein serine/threonine kinase activity;GO:0005524//ATP binding
CL2915.Contig3_All	1.24	4.04	1.704015172	5.34E-08	3.51E-09	HMG	K11430//histone-lysine N-methyltransferase EZH2 [EC:2.1.1.43]+ko05206//MicroRNAs in cancer+ko00310//Lysine degradation;K11430//histone-lysine N-methyltransferase EZH2 [EC:2.1.1.43]+ko05206//MicroRNAs in cancer+ko00310//Lysine degradation;K11430//histone-lysine N-methyltransferase EZH2 [EC:2.1.1.43]+ko05206//MicroRNAs in cancer+ko00310//Lysine degradation;K11430//histone-lysine N-methyltransferase…	XM_027360170.1 PREDICTED: Penaeus vannamei histone-lysine N-methyltransferase E(z)-like (LOC113808695), mRNA	histone-lysine N-methyltransferase E(z)-like [Penaeus vannamei]	SET domain	[K] KOG1079 Transcriptional repressor EZH1	Histone-lysine N-methyltransferase E(z) OS=Drosophila melanogaster OX=7227 GN=E(z) PE=1 SV=2
CL2363.Contig2_All	1.52	4.95	1.703357202	5.24E-19	1.50E-20	zf-C2H2	K05619//transglutaminase 1 [EC:2.3.2.13];K05619//transglutaminase 1 [EC:2.3.2.13];K05619//transglutaminase 1 [EC:2.3.2.13];K05619//transglutaminase 1 [EC:2.3.2.13]	XM_027362945.1 PREDICTED: Penaeus vannamei annulin-like (LOC113811248), transcript variant X2, mRNA	annulin-like isoform X2 [Penaeus vannamei] >ROT72200.1 Annulin [Penaeus vannamei]	Transglutaminase family	[V] TWOG0528 Blood coagulation factor XIIIa/Transglutaminase	Annulin OS=Schistocerca americana OX=7009 PE=2 SV=1	GO:0003810//protein-glutamine gamma-glutamyltransferase activity;GO:0018149//peptide cross-linking;GO:0018149//peptide cross-linking;GO:0046872//metal ion binding
CL1642.Contig5_All	1.09	3.54	1.699421225	1.66E-08	1.03E-09		K11294//nucleolin+ko05130//Pathogenic Escherichia coli infection;K14563//rRNA 2'-O-methyltransferase fibrillarin [EC:2.1.1.-]+ko03008//Ribosome biogenesis in eukaryotes;K14563//rRNA 2'-O-methyltransferase fibrillarin [EC:2.1.1.-]+ko03008//Ribosome biogenesis in eukaryotes;K14563//rRNA 2'-O-methyltransferase fibrillarin [EC:2.1.1.-]+ko03008//Ribosome biogenesis in eukaryotes;K14563//rRNA 2'-O-meth…	XM_027350767.1 PREDICTED: Penaeus vannamei uncharacterized LOC113800045 (LOC113800045), mRNA	basic proline-rich protein-like, partial [Camelus dromedarius]	Dipicolinate synthase subunit A N-terminal domain	[R] KOG1995 Conserved Zn-finger protein	Mucin-21 OS=Homo sapiens OX=9606 GN=MUC21 PE=1 SV=2
CL1555.Contig4_All	0.61	1.98	1.698619283	8.57E-10	4.66E-11		K10407//kinesin light chain+ko05132//Salmonella infection;K10407//kinesin light chain+ko05132//Salmonella infection;K10407//kinesin light chain+ko05132//Salmonella infection;K10407//kinesin light chain+ko05132//Salmonella infection	XM_027372050.1 PREDICTED: Penaeus vannamei kinesin light chain-like (LOC113819781), transcript variant X13, mRNA	kinesin light chain-like isoform X3 [Penaeus vannamei]	Tetratricopeptide repeat	[Z] KOG1840 Kinesin light chain	Kinesin light chain OS=Drosophila melanogaster OX=7227 GN=Klc PE=1 SV=1	GO:0005871//kinesin complex;GO:0003777//microtubule motor activity;GO:0005871//kinesin complex;GO:0005871//kinesin complex
CL1521.Contig2_All	0.98	3.18	1.698173111	4.43E-11	2.12E-12	NF-YA	K08064//nuclear transcription factor Y, alpha+ko04612//Antigen processing and presentation+ko05152//Tuberculosis;K08064//nuclear transcription factor Y, alpha+ko04612//Antigen processing and presentation+ko05152//Tuberculosis;K08064//nuclear transcription factor Y, alpha+ko04612//Antigen processing and presentation+ko05152//Tuberculosis;K08064//nuclear transcription factor Y, alpha+ko04612//Antig…	XM_027376572.1 PREDICTED: Penaeus vannamei nuclear transcription factor Y subunit alpha-like (LOC113823825), transcript variant X8, mRNA	nuclear transcription factor Y subunit alpha-like isoform X7 [Penaeus vannamei]	CCAAT-binding transcription factor (CBF-B/NF-YA) subunit B	[K] KOG1561 CCAAT-binding factor, subunit B (HAP2)	Nuclear transcription factor Y subunit alpha OS=Dictyostelium discoideum OX=44689 GN=nfyA PE=3 SV=1
Unigene12113_All	1.41	4.57	1.696499003	6.61E-14	2.56E-15			XM_027359654.1 PREDICTED: Penaeus vannamei uncharacterized LOC113808267 (LOC113808267), transcript variant X1, mRNA	hypothetical protein C7M84_000064 [Penaeus vannamei]	Domain of unknown function (DUF4728)			GO:0016021//integral component of membrane
CL1186.Contig2_All	1.31	4.24	1.694497453	5.26E-12	2.34E-13		K12301//MFS transporter, ACS family, solute carrier family 17 (sodium-dependent inorganic phosphate cotransporter), member 5+ko04142//Lysosome;K12301//MFS transporter, ACS family, solute carrier family 17 (sodium-dependent inorganic phosphate cotransporter), member 5+ko04142//Lysosome;K12301//MFS transporter, ACS family, solute carrier family 17 (sodium-dependent inorganic phosphate cotransporter…	XM_027369157.1 PREDICTED: Penaeus vannamei sodium-dependent phosphate transport protein 1, chloroplastic-like (LOC113817147), transcript variant X2, mRNA	sodium-dependent phosphate transport protein 1, chloroplastic-like isoform X1 [Penaeus vannamei]	Major Facilitator Superfamily	[G] KOG2532 Permease of the major facilitator superfamily	Sialin OS=Ovis aries OX=9940 GN=SLC17A5 PE=2 SV=1	GO:0022857//transmembrane transporter activity;GO:0016021//integral component of membrane
Unigene5130_All	1.24	4.01	1.693262116	1.87E-11	8.68E-13			XM_027355181.1 PREDICTED: Penaeus vannamei transmembrane protein 147-like (LOC113804316), mRNA		Selenoprotein SelK_SelG
CL1993.Contig2_All	0.57	1.84	1.690671942	3.62E-05	3.59E-06			XM_027358676.1 PREDICTED: Penaeus vannamei uncharacterized LOC113807424 (LOC113807424), mRNA	putative integrin-alpha FG-GAP repeat-containing protein 2-like isoform X1 [Penaeus vannamei]	AhpC/TSA antioxidant enzyme			GO:0007229//integrin-mediated signaling pathway;GO:0007229//integrin-mediated signaling pathway;GO:0055114//oxidation-reduction process;GO:0007229//integrin-mediated signaling pathway;GO:0007229//integrin-mediated signaling pathway;GO:0007229//integrin-mediated signaling pathway
CL42.Contig1_All	3.37	10.87	1.689531444	1.17E-27	2.26E-29			XM_027356694.1 PREDICTED: Penaeus vannamei uncharacterized LOC113805641 (LOC113805641), transcript variant X1, mRNA		GWT1
[truncated: 3,784 more rows]
